# Supplementary material for: Chemical characterization of organic vapors from wood, straw, cow dung, and coal burning
Source: Copernicus journal article supplement (doi:10.5194/acp-25-2707-2025), 2025-03-03
Supplement: Supplementary file 1 [file acp-25-2707-2025-supplement.zip]

## Sheet: EFs
			pine stove					pine open					beech stove					straw					cow dung						coal
ions	m/z	kptr	average relative contribution	SD	average EFS			average relative contribution	SD	average EFS	SD		average relative contribution	SD	average EFS	SD		average relative contribution	SD	average EFS	SD		average relative contribution	SD	average EFS	SD			average relative contribution	SD	average EFS	SD
C3H3+	39.0229	2	0.332253	0.0450857	0.0681667	0.0258412		0.368783	0.0320426	0.0527666	0.00524727		0.342683	0.111894	0.119911	0.0796509		0.459517	0.101429	0.0711334	0.0337573		0.270598	0.0348963	0.00174905	0.000483806			0.332551	0.332551	0.0147505	0.0147505
C3H5+	41.0386	1.75	1.8799	0.19357	0.406219	0.150682		1.72527	0.2106	0.25779	0.0276165		1.73255	0.563481	0.639995	0.427693		2.20922	0.866006	0.316159	0.102655		0.919271	0.124164	0.00660696	0.00195479			1.70295	1.70295	0.08134	0.08134
C2H4N+	42.0338	3.82	0.0187618	0.00522456	0.0038372	0.00122354		0.0910768	0.00699028	0.013702	0.000798194		0.0108462	0.00127371	0.00364766	0.00203525		0.0993011	0.0696642	0.0272522	0.0257723		0.134773	0.0147716	0.00101822	0.000283409			0.111095	0.111095	0.0051724	0.0051724
C2H3O+	43.0178	2	3.09187	0.101102	0.690317	0.239404		1.94493	0.0619163	0.313339	0.037337		3.93659	0.863864	1.22394	0.541631		3.306	0.720153	0.575424	0.30203		0.746681	0.0350351	0.00583603	0.0011413			1.79082	1.79082	0.0873462	0.0873462
C3H7+	43.0542	1.59	0.942269	0.0650131	0.212591	0.0758581		1.07876	0.143157	0.169193	0.0191082		1.16612	0.27512	0.437787	0.279552		1.1649	0.540567	0.165373	0.0442187		0.912134	0.134233	0.00726163	0.00230048			1.66248	1.66248	0.0857444	0.0857444
CH2NO+	44.0131	2	0.00926475	0.00893346	0.00159485	0.00136199		0.0167444	0.00218586	0.00262307	0.000227049		0.00482328	0.00273839	0.00129323	0.000298905		0.077651	0.0780899	0.0255535	0.0271254		0.00972847	0.00560004	7.80862e-05	4.12828e-05			0.0052405	0.0052405	0.000251719	0.000251719
C2H6N+	44.0495	2	0.00877529	0.00301857	0.00198537	0.000780266		0.00783703	0.000453001	0.00124858	8.1941e-05		0.00517148	0.00178678	0.00157647	0.000630889		0.0307599	0.00419011	0.0064874	0.00469069		0.0233614	0.00720076	0.000184732	4.78838e-05			0.00380048	0.00380048	0.000185337	0.000185337
C2H5O+	45.0335	3.09	3.90495	0.538176	0.925199	0.350852		2.57351	0.254557	0.423525	0.0407213		2.37121	0.793501	0.927413	0.569904		3.6292	0.445804	0.691405	0.378714		1.32076	0.225312	0.0114255	0.00334131			0.372152	0.372152	0.0190966	0.0190966
CH4NO+	46.0287	3.73	0.0101267	0.0202533	0.00147592	0.00295183		0.0238661	0.00304496	0.00381343	0.000223685		0.0344373	0.0175418	0.00995491	0.00271279		0.586157	0.589587	0.20198	0.214523		0.0254166	0.0202082	0.000220554	0.000171394			0.0288633	0.0288633	0.00152316	0.00152316
CH3O2+	47.0128	1.92	0.0784784	0.0148553	0.0189379	0.00606109		0.0436022	0.00120279	0.00761007	0.00081287		0.0605539	0.0276074	0.0178982	0.00406882		0.0516622	0.00969613	0.0100796	0.00555929		0.0420372	0.00558966	0.000390194	7.13473e-05			0.0516652	0.0516652	0.00270583	0.00270583
C2H7O+	47.0491	2.31	0.0115497	0.0174088	0.00196134	0.00265602		0.0197054	0.00223509	0.00348886	0.000474165		0.0331768	0.00479439	0.0121841	0.00697709		0.0807242	0.0813882	0.0285186	0.0304761		0.0378856	0.00215263	0.000352685	5.39354e-05			0.0296424	0.0296424	0.00148321	0.00148321
C4H3+	51.0229	2	0.0231628	0.00792647	0.00597813	0.00203883		0.00609609	0.000468253	0.00110096	8.87515e-05		0.00748936	0.00265231	0.00267359	0.00106717		0.00472771	0.000747936	0.00114405	0.000792801		0.00472418	0.00370058	5.26091e-05	4.46332e-05			0.00965834	0.00965834	0.000531977	0.000531977
C4H5+	53.0386	2	0.127763	0.0446934	0.0356167	0.0168801		0.105287	0.00606467	0.021002	0.00270654		0.115827	0.0351601	0.0490697	0.0251053		0.109504	0.0211359	0.0235719	0.0118834		0.106526	0.00423485	0.00127664	0.000251425			0.126172	0.126172	0.00737934	0.00737934
C3H4N+	54.0338	3.55	0.0164767	0.018931	0.00372553	0.00350611		0.122527	0.000797598	0.0245126	0.00224913		0.0148482	0.00457143	0.00536545	0.00143308		0.0521353	0.00964961	0.0145062	0.011033		0.120071	0.0177767	0.00149074	0.000320428			0.0368426	0.0368426	0.00212966	0.00212966
C3H5O+	57.0335	1.57	6.79766	1.78824	2.00362	0.794612		6.8576	0.304589	1.45815	0.145185		5.07625	1.20641	2.35905	1.21537		5.01392	2.20127	0.978584	0.314546		10.8939	1.39465	0.153133	0.0433603			2.82788	2.82788	0.183597	0.183597
C4H9+	57.0699	1.78	0.562003	0.0891339	0.16961	0.0627618		0.41018	0.0543962	0.0863079	0.0103047		0.463931	0.234178	0.263182	0.215339		0.563964	0.211101	0.115439	0.0408203		1.25789	0.175736	0.0178301	0.00559908			1.05872	1.05872	0.0725115	0.0725115
C2H4NO+	58.0287	2	0.00361399	0.00611393	0.000792572	0.00119511		0.0002874	0.000315813	5.22208e-05	5.7961e-05		0.00443045	0.00298061	0.00159461	0.000569632		0.0246595	0.00295205	0.00637177	0.00404419		0.0343518	0.00334156	0.000487101	5.70778e-05			0.0033884	0.0033884	0.000237718	0.000237718
C3H7O+	59.0491	3.21	3.2254	0.448139	1.0058	0.386622		2.2814	0.346866	0.502618	0.0714141		1.99111	0.76016	1.05183	0.692806		4.79163	0.856645	1.42812	1.01666		2.3694	0.329015	0.0358424	0.010892			0.689622	0.689622	0.0480479	0.0480479
C2H6NO+	60.0444	3.7	0.053414	0.0179992	0.0155531	0.00399514		0.0510493	0.00649866	0.0110183	0.000968858		0.020035	0.00996241	0.00730823	0.00147344		0.102019	0.0444778	0.0358018	0.0317297		0.200739	0.0521535	0.00296956	0.000416509			0.0346241	0.0346241	0.00236186	0.00236186
C2H5O2+	61.0284	2.23	5.49309	0.549546	1.75332	0.661607		3.0951	0.330195	0.725761	0.121125		5.20395	2.34327	2.02498	0.538814		4.33885	0.685601	1.33914	1.03438		2.09114	0.197352	0.0333719	0.00713925			2.81153	2.81153	0.197419	0.197419
CH4NO2+	62.0237	3.7	0.0102792	0.0205584	0.00203031	0.00406063		0.0330837	0.00486003	0.00748637	0.000872871		0.0215692	0.0107227	0.00841536	0.00238237		0.0673676	0.0678854	0.0315223	0.0336414		0.0150108	0.00277205	0.000241633	3.45976e-05			0.00459706	0.00459706	0.000326049	0.000326049
C2H7O2+	63.0441	2	0.617278	0.097165	0.205093	0.0774722		0.510938	0.0366169	0.119226	0.0111118		0.212986	0.06585	0.116027	0.0690622		0.243397	0.0885255	0.0857979	0.069772		0.528333	0.0878999	0.00907578	0.00259834			0.181566	0.181566	0.0129146	0.0129146
CH5O3+	65.0233	2	0.0302745	0.00775794	0.00999075	0.0029619		0.0156509	0.00070965	0.00384337	0.000478527		0.00998699	0.00406782	0.00429605	0.00142103		0.010918	0.00513592	0.00424216	0.00372101		0.0508361	0.00364762	0.000929602	0.000222972			0.0173769	0.0173769	0.001254	0.001254
C5H7+	67.0542	1.81	0.672323	0.280729	0.239563	0.126244		0.49181	0.0142241	0.124278	0.0144135		0.439935	0.198766	0.25314	0.150602		0.497739	0.133044	0.129419	0.0560823		0.62406	0.0475151	0.0120956	0.00274171			1.88405	1.88405	0.138081	0.138081
C4H6N+	68.0495	2	0.0345442	0.00902611	0.0116904	0.0033353		0.337265	0.00662145	0.0850775	0.0073685		0.0760903	0.0166019	0.0420273	0.0219214		0.468887	0.0806443	0.132783	0.0671905		1.7938	0.176784	0.0354952	0.00630857			0.101094	0.101094	0.00773657	0.00773657
C4H5O+	69.0335	2	1.5057	0.472304	0.536604	0.195509		0.934024	0.091399	0.242139	0.0288863		1.38059	0.461262	0.88973	0.644878		1.01285	0.272148	0.269209	0.117299		1.00175	0.167572	0.0207947	0.00627031			0.232231	0.232231	0.0181462	0.0181462
C5H9+	69.0699	1.95	0.316946	0.063306	0.117794	0.0501416		0.619923	0.110714	0.153842	0.0194666		0.216598	0.0970657	0.138296	0.091141		0.496295	0.143933	0.129821	0.0526208		0.934893	0.156562	0.0194944	0.00632948			0.362952	0.362952	0.0297135	0.0297135
C3H4NO+	70.0287	2	0.0229457	0.00767107	0.00788344	0.00312946		0.023122	0.00143894	0.00598688	0.000519276		0.0141742	0.00326136	0.0085423	0.0063361		0.0353775	0.00705094	0.0109347	0.00683443		0.0995336	0.0163173	0.00211699	0.000587059			0.00361972	0.00361972	0.000289767	0.000289767
C4H8N+	70.0651	2	0.019498	0.00318589	0.00690971	0.0018136		0.0799863	0.0157196	0.0199233	0.00268696		0.0138577	0.00444686	0.00897202	0.00648746		0.108171	0.0189596	0.0312918	0.0157694		0.39813	0.0537267	0.00853009	0.00248575			0.0230905	0.0230905	0.00196188	0.00196188
C3H3O2+	71.0128	2	0.193556	0.0532837	0.0712872	0.0251615		0.158739	0.0192976	0.0404378	0.00316971		0.071469	0.0119524	0.0379745	0.0172783		0.128563	0.113404	0.0650609	0.0653213		0.245901	0.00730903	0.00534796	0.00109823			0.128728	0.128728	0.0100592	0.0100592
C4H7O+	71.0491	3.87	1.47462	0.11402	0.549982	0.189191		0.955056	0.0669072	0.256883	0.0307776		1.04078	0.278769	0.646856	0.396166		1.44732	0.173878	0.501127	0.342023		0.627688	0.0985976	0.0137594	0.00397737			0.148561	0.148561	0.0118352	0.0118352
C5H11+	71.0855	1.87	0.120083	0.0239695	0.0449434	0.0161435		0.150312	0.0409883	0.0380553	0.00767564		0.0886126	0.0419163	0.0613192	0.0462867		0.179317	0.0571356	0.0475557	0.0185195		0.406596	0.0648513	0.00903414	0.00303803			0.26578	0.26578	0.0234772	0.0234772
C3H6NO+	72.0444	2	0.0330293	0.00847452	0.0116601	0.00248892		0.0383899	0.0030725	0.010523	0.00152111		0.0133582	0.00499099	0.00853807	0.00677983		0.0700134	0.0197829	0.0203477	0.0106442		0.128985	0.00896224	0.00284881	0.000369415			0.0284631	0.0284631	0.00222674	0.00222674
C3H5O2+	73.0284	2	0.264457	0.0217755	0.0997335	0.0302364		0.255161	0.00767336	0.0680182	0.00430383		0.241728	0.0894004	0.115276	0.0306182		0.37746	0.19479	0.0935194	0.0330823		0.238986	0.0132093	0.00545774	0.000900745			0.186775	0.186775	0.0151725	0.0151725
C4H9O+	73.0648	3.14	1.06848	0.165708	0.413549	0.160266		0.428538	0.0812495	0.117904	0.0200666		0.913165	0.453574	0.668895	0.55435		1.73334	0.333408	0.636749	0.444401		0.825287	0.127185	0.019204	0.00574545			0.147873	0.147873	0.0131466	0.0131466
C2H4NO2+	74.0237	2	0.168167	0.0739779	0.0632062	0.0258989		0.0233619	0.00231048	0.00612379	0.000255126		0.0443669	0.022443	0.0207764	0.00556715		0.111554	0.111994	0.062186	0.0656722		0.134939	0.0260442	0.00310111	0.000441959			0.0489461	0.0489461	0.00413286	0.00413286
C3H8NO+	74.06	2	0.0204886	0.0041649	0.00742745	0.00113256		0.0392792	0.00421353	0.0105473	0.000842994		0.0182763	0.00273475	0.011435	0.00783307		0.0841833	0.00834608	0.0299059	0.0212771		0.184074	0.03092	0.00422386	0.000302555			0.0294869	0.0294869	0.00251616	0.00251616
C3H7O2+	75.0441	2.33	3.25961	0.296083	1.28418	0.483041		1.73658	0.265936	0.510593	0.102859		4.33848	0.657803	2.73712	1.67859		4.66778	0.330281	1.64963	1.10315		2.20686	0.32449	0.0525821	0.00683685			1.8194	1.8194	0.159542	0.159542
C2H6NO2+	76.0393	3.63	0.0117318	0.00754465	0.0037861	0.0015087		0.0186841	0.000326195	0.00522795	0.000422898		0.0131226	0.00281578	0.00847691	0.00610512		0.0349712	0.0218324	0.017048	0.0159328		0.0259771	0.00332988	0.000641126	0.00010824			0.00671645	0.00671645	0.000588793	0.000588793
C2H5O3+	77.0233	2	0.162813	0.0537152	0.062663	0.0186778		0.229604	0.041662	0.0627529	0.00750933		0.0894436	0.0402929	0.0457754	0.0155501		0.0408255	0.0204689	0.0192183	0.0174062		0.0625176	0.00828423	0.00158813	0.000324549			0.227726	0.227726	0.0192256	0.0192256
C6H5+	77.0386	2	0.0742171	0.011875	0.0293608	0.00878698		0.05429	0.00553811	0.0154183	0.00202861		0.0409146	0.00786778	0.0250816	0.0141634		0.0439329	0.00285944	0.016246	0.0109723		0.057319	0.005187	0.00147919	0.000364477			0.133725	0.133725	0.011438	0.011438
CH4NO3+	78.0186	2	0.00594498	0.00324293	0.00245964	0.00131929		0	0	0	0		0.000581861	0.000300822	0.000296146	0.000122047		0.013979	0.0140373	0.0082215	0.00868861		0.0070974	0.00140496	0.00018213	3.64968e-05			0.000786329	0.000786329	6.91566e-05	6.91566e-05
C5H4N+	78.0338	2	0.00448302	0.00184899	0.00168388	0.000591845		0.00549324	0.000310978	0.00160855	0.000194015		0.000477966	0.000346333	0.000410862	0.000422985		0.00187976	0.00188697	0.00110525	0.00116679		0.0047504	0.00106174	0.00012356	3.12056e-05			0.0193432	0.0193432	0.00162453	0.00162453
C6H7+	79.0542	1.93	1.94903	0.771324	0.78257	0.347901		1.54406	0.195047	0.45347	0.0693527		1.03582	0.320265	0.611032	0.274929		0.597035	0.130234	0.190214	0.0950766		0.619748	0.0997317	0.0167021	0.00386666			5.68024	5.68024	0.492754	0.492754
C5H6N+	80.0495	2.79	0.0107292	0.00293322	0.0043138	0.00128096		0.0373769	0.00446373	0.0111582	0.00168134		0.00817275	0.00222954	0.00477241	0.00184116		0.100485	0.034858	0.0442061	0.0351959		0.476469	0.0724325	0.0129601	0.00207753			0.0364779	0.0364779	0.00304504	0.00304504
C5H5O+	81.0335	2	0.98314	0.349925	0.419791	0.222339		1.31718	0.0373475	0.393694	0.0298502		1.69585	0.48668	0.966151	0.371593		1.40252	0.237713	0.581579	0.438768		1.02615	0.194134	0.028315	0.00339132			1.39063	1.39063	0.127107	0.127107
C6H9+	81.0699	2	2.0916	1.72295	1.06395	1.00009		1.6265	0.417541	0.499965	0.126286		0.453842	0.224714	0.321662	0.196266		0.613031	0.0890171	0.209964	0.110679		0.558991	0.0571275	0.0160167	0.00431053			0.67531	0.67531	0.0636163	0.0636163
C4H4NO+	82.0287	2	0.000534876	0.00106975	0.000140281	0.000280561		0.00118654	0.000156976	0.000327752	3.43042e-05		9.1129e-05	0.000149624	6.65288e-05	0.000136061		0.000921449	0.000700719	0.000234657	0.0001242		0.00149421	0.00107341	4.24826e-05	3.59746e-05			0.00419492	0.00419492	0.000385555	0.000385555
C5H8N+	82.0651	2	0.0608763	0.00739711	0.0274796	0.0128594		0.130183	0.0149552	0.0395709	0.00428909		0.091607	0.0425323	0.0730761	0.0549458		0.338357	0.0752156	0.114683	0.0562021		0.839508	0.0859479	0.0246223	0.00638281			0.0366877	0.0366877	0.00360715	0.00360715
C5H7O+	83.0491	2	4.1582	0.818792	1.85174	0.778325		1.77292	0.221397	0.565791	0.0980178		4.35321	1.13751	3.28472	2.32679		3.87229	0.242874	1.46896	0.895521		2.94957	0.134561	0.087795	0.0171073			0.824927	0.824927	0.077383	0.077383
C6H11+	83.0855	1.96	0.200115	0.0242555	0.0893938	0.0362761		0.209925	0.0126663	0.0640962	0.00474543		0.138072	0.0579676	0.107078	0.0732447		0.283486	0.0660031	0.0937922	0.0432196		0.308322	0.0523339	0.00939785	0.00323339			0.235625	0.235625	0.0241548	0.0241548
C4H6NO+	84.0444	2	0.066162	0.0216841	0.0285358	0.0105001		0.0311082	0.00231492	0.00967527	0.000855062		0.0251845	0.0157353	0.0224657	0.0227845		0.0713743	0.013874	0.0246296	0.0128142		0.165366	0.0167766	0.00504848	0.00107755			0.0185199	0.0185199	0.00178462	0.00178462
C5H10N+	84.0808	2	0.0194603	0.00281173	0.00825263	0.00193989		0.134735	0.0317894	0.0397249	0.00648458		0.0160722	0.00683867	0.0127132	0.00882766		0.170271	0.0419248	0.055996	0.0246159		0.321503	0.0515477	0.00999358	0.00313282			0.0127727	0.0127727	0.00131193	0.00131193
C4H5O2+	85.0284	2	0.575958	0.229622	0.246543	0.112765		1.24459	0.183262	0.402453	0.0722685		1.03904	0.208943	0.635513	0.228052		1.46467	0.341826	0.647707	0.522536		1.19863	0.200086	0.0365853	0.0041473			2.20966	2.20966	0.212842	0.212842
C5H9O+	85.0648	2	3.76034	0.675802	1.70393	0.696338		1.00603	0.081902	0.337201	0.0563497		2.51143	0.921157	2.00721	1.46671		2.66875	0.295854	1.00491	0.57293		1.4644	0.157712	0.0462148	0.0123363			0.356289	0.356289	0.0351815	0.0351815
C6H13+	85.1012	2.01	0.0536247	0.00793877	0.0240278	0.00832106		0.0925187	0.0139313	0.0282816	0.00285661		0.0396308	0.0194611	0.0331402	0.0249543		0.113368	0.029786	0.0374213	0.0162062		0.139312	0.0243191	0.00447456	0.00159454			0.181012	0.181012	0.0192565	0.0192565
C3H4NO2+	86.0237	2	0.0132093	0.0126208	0.00409427	0.00354931		0.0221849	0.00381779	0.00679722	0.000767136		0.0153336	0.0114863	0.00937481	0.00656584		0.0165013	0.0141962	0.0101227	0.0104081		0.0298774	0.0040677	0.000947121	0.000183587			0.0208716	0.0208716	0.00202083	0.00202083
C4H8NO+	86.06	2	0.0447139	0.00798214	0.0190404	0.00334852		0.103679	0.00484566	0.0331322	0.00284149		0.0376792	0.0103195	0.0286579	0.0212013		0.201725	0.0168021	0.0824044	0.0565726		0.339892	0.0416568	0.0107808	0.00187295			0.0510614	0.0510614	0.00505601	0.00505601
C4H7O2+	87.0441	1.7	6.05638	1.25003	2.79737	1.16388		3.23836	0.0840104	1.06743	0.123971		6.92253	1.10791	4.98414	2.66687		6.72142	3.06612	1.95485	0.514311		4.73039	0.610408	0.153518	0.0272157			4.65246	4.65246	0.460374	0.460374
C5H11O+	87.0804	3.24	0.530149	0.142142	0.24434	0.102978		0.131968	0.0240818	0.0444396	0.00827674		0.337484	0.191354	0.305442	0.277121		0.523016	0.0995843	0.228891	0.159049		0.214988	0.0290412	0.00714943	0.0020947			0.0703545	0.0703545	0.00753343	0.00753343
C3H6NO2+	88.0393	2	0.121677	0.0436137	0.0530651	0.0166058		0.045106	0.00615986	0.0144203	0.00143986		0.038261	0.0114914	0.0274856	0.0187827		0.0852097	0.0140794	0.0382068	0.0279977		0.117342	0.00594273	0.00391033	0.000623596			0.0481695	0.0481695	0.00487885	0.00487885
C4H10NO+	88.0757	2	0.0164192	0.0043276	0.00708134	0.00131897		0.0253147	0.00346485	0.00799142	0.000696761		0.00839885	0.00224993	0.0064585	0.00425374		0.0680027	0.0166133	0.0248435	0.0136308		0.119708	0.00845171	0.00402094	0.000822748			0.0148145	0.0148145	0.00153447	0.00153447
C3H5O3+	89.0233	2	0.527676	0.232127	0.241799	0.100815		0.366338	0.0677321	0.114868	0.0135103		0.102592	0.0409512	0.0609515	0.0194543		0.139367	0.139996	0.0937217	0.0991536		0.209976	0.0161346	0.00712215	0.00100179			0.501793	0.501793	0.0479035	0.0479035
C4H9O2+	89.0597	2.19	0.965098	0.0671413	0.457879	0.184075		0.588058	0.077972	0.202002	0.0362255		1.12896	0.167003	0.77116	0.392949		1.23761	0.1089	0.519966	0.340968		0.614158	0.0549525	0.0208491	0.00298413			0.573408	0.573408	0.0583807	0.0583807
C2H4NO3+	90.0186	2	0.101891	0.0687333	0.0412557	0.0186544		0.131997	0.0151163	0.043133	0.00359464		0.0307691	0.0139031	0.0183124	0.00631597		0.492231	0.494287	0.334607	0.353632		0.167292	0.0257315	0.00574377	0.000669557			0.0744934	0.0744934	0.00738159	0.00738159
C3H8NO2+	90.055	3.78	0.00829452	0.00468634	0.00324958	0.000971476		0.0135055	0.00121864	0.00440868	0.000288748		0.00641812	0.00218719	0.00530059	0.00436847		0.0158713	0.00112857	0.00693344	0.00485857		0.0137856	0.00199474	0.000477489	8.00019e-05			0.00597741	0.00597741	0.000609168	0.000609168
C3H7O3+	91.039	2	0.162008	0.0263993	0.0748055	0.0221957		0.23586	0.00535754	0.0799427	0.00697554		0.159088	0.0642506	0.0942037	0.0240961		0.132696	0.033846	0.0650734	0.0535138		0.13794	0.0208158	0.00485434	0.000683628			0.31958	0.31958	0.0326494	0.0326494
C7H7+	91.0542	2	0.324912	0.0647069	0.163941	0.0774238		0.277395	0.0106282	0.094538	0.0102395		0.215406	0.0448766	0.172151	0.111806		0.375696	0.110013	0.186402	0.14649		0.645455	0.0388179	0.0233088	0.00534754			1.10846	1.10846	0.116184	0.116184
C2H6NO3+	92.0342	2	0.00156356	0.00134152	0.000557587	0.000411466		0.000765179	0.000110378	0.000251297	2.23836e-05		0.00142115	0.000714314	0.000851335	0.000287873		0.00130255	0.00131401	0.000910214	0.000974033		0.00253396	0.000998996	8.88152e-05	2.62486e-05			0.00223941	0.00223941	0.000234765	0.000234765
C2H5O4+	93.0182	2	0.0428029	0.0197899	0.0204551	0.00866853		0.0515639	0.0123619	0.0165172	0.00267943		0.0175065	0.0092107	0.0104738	0.00353024		0.0263469	0.00281013	0.0106752	0.00608258		0.0291097	0.00308981	0.00109795	0.000265365			0.0254026	0.0254026	0.00236882	0.00236882
C6H5O+	93.0335	2	0.0335027	0.0102009	0.0148689	0.00263528		0.0413723	0.000560551	0.0143629	0.00130388		0.0391831	0.0128137	0.0258193	0.0108211		0.0217658	0.00454181	0.00859575	0.00536987		0	0	0	0			0	0	0	0
C3H9O3+	93.0546	2	0.0506646	0.00656519	0.0243563	0.00803254		0.0329467	0.00106456	0.0114897	0.00110622		0.0754428	0.0137127	0.0608121	0.0419637		0.0538939	0.00468682	0.0233827	0.0152324		0.118085	0.017008	0.0043719	0.000703422			0.157949	0.157949	0.0167457	0.0167457
C7H9+	93.0699	2.08	1.07059	0.26913	0.559525	0.277987		0.672027	0.0279931	0.237004	0.0288736		0.461157	0.196054	0.403097	0.290302		0.616507	0.0789855	0.247934	0.137243		0.762345	0.0671824	0.0289509	0.00769806			4.47158	4.47158	0.476357	0.476357
C5H4NO+	94.0287	2	0.0378858	0.00991563	0.0188807	0.00848429		0.0255131	0.00575574	0.00898472	0.00203426		0.0144763	0.0105747	0.0121209	0.0121734		0.0486064	0.0215466	0.0153421	0.00387241		0.1672	0.035872	0.00649292	0.0020805			0	0	0	0
C6H8N+	94.0651	2.37	0.0148779	0.00234458	0.00752086	0.00306849		0.0451279	0.00635279	0.0148438	0.00103484		0.0131885	0.00300305	0.0105994	0.00625469		0.0886023	0.0177889	0.043351	0.0322538		0.284567	0.0877442	0.0105751	0.00284284			0.0382948	0.0382948	0.00406958	0.00406958
C5H3O2+	95.0128	2	0.283943	0.0343848	0.139924	0.0472928		0.055872	0.0333747	0.0221909	0.0109035		0.213999	0.0914088	0.147385	0.0777017		0.406963	0.0543717	0.186123	0.126424		0.357684	0.0304187	0.0139011	0.00231421			0.0238778	0.0238778	0.0026835	0.0026835
C2H7O4+	95.0339	2	0.0464301	0.0142687	0.0208917	0.00171272		0.0265011	0.00964787	0.00929541	0.00266712		0.00554142	0.00771607	0.0068401	0.00965842		0.0170737	0.0189022	0.00274326	0.00278554		0.0889608	0.046867	0.00330777	0.0016151			0.281978	0.281978	0.0292479	0.0292479
C6H7O+	95.0491	2.16	1.24052	0.189429	0.626574	0.253005		1.24168	0.0710194	0.425088	0.0301076		1.53049	0.221233	1.15013	0.647871		1.54436	0.171938	0.726562	0.520494		1.3677	0.113684	0.0529287	0.00749705			2.77621	2.77621	0.292492	0.292492
C7H11+	95.0855	2	0.407833	0.163134	0.228549	0.146465		0.481345	0.0397937	0.170546	0.0214523		0.248464	0.117488	0.224014	0.157181		0.452701	0.0602375	0.186591	0.102493		0.401181	0.0547062	0.0159952	0.00500397			0.284981	0.284981	0.0331772	0.0331772
C5H6NO+	96.0444	2	0.0214477	0.0104117	0.0090963	0.00169231		0.0239082	0.00105893	0.00826824	0.000422408		0.0223984	0.00563028	0.018992	0.0144675		0.0416426	0.0174604	0.0228759	0.0205787		0.106018	0.0248377	0.00407752	0.000518015			0.0500693	0.0500693	0.00532627	0.00532627
C6H10N+	96.0808	2	0.0357913	0.00243173	0.0185449	0.00747467		0.180713	0.0235854	0.0637836	0.00680083		0.0400584	0.0271278	0.040676	0.0350921		0.434808	0.1047	0.165803	0.075017		1.40629	0.105585	0.0567825	0.014311			0.0411019	0.0411019	0.0048779	0.0048779
C5H5O2+	97.0284	2	10.1397	1.31033	5.11582	1.73757		2.21951	1.41158	0.885284	0.460253		7.1316	3.23327	4.98013	2.72885		6.55062	0.737177	2.92364	1.86496		5.06633	0.474322	0.205042	0.0328142			2.04494	2.04494	0.224957	0.224957
C6H9O+	97.0648	2	1.87494	0.243137	0.972628	0.385843		0.761698	0.0977589	0.284152	0.0494668		1.7482	0.247645	1.4565	0.915422		1.80772	0.141095	0.800935	0.48349		1.32411	0.102899	0.0535762	0.0080348			0.757284	0.757284	0.0829357	0.0829357
C7H13+	97.1012	2	0.101783	0.0123218	0.0531609	0.0212553		0.124945	0.0101813	0.0442582	0.00304052		0.0789905	0.0282922	0.0708076	0.0474146		0.175871	0.0460553	0.0666138	0.0290214		0.177985	0.0284704	0.00744992	0.00256161			0.147413	0.147413	0.0178686	0.0178686
C4H4NO2+	98.0237	2	0.0782108	0.0160054	0.0382932	0.0089964		0.0113208	0.000222485	0.0041731	0.000419733		0.0237589	0.0235182	0.0263054	0.0289629		0.0424235	0.0132513	0.0164559	0.00834487		0.112257	0.0244298	0.00455275	0.000843057			0.0215502	0.0215502	0.00237873	0.00237873
C5H8NO+	98.06	2	0.0513841	0.0149405	0.0255315	0.00778257		0.0308266	0.0043092	0.0109549	0.00108587		0.0184283	0.01204	0.0191583	0.019534		0.0712618	0.0137081	0.0286521	0.0146583		0.219221	0.00926303	0.0090914	0.00149721			0.0308458	0.0308458	0.00339696	0.00339696
C6H12N+	98.0964	2	0.0115396	0.00157252	0.00574618	0.00144076		0.0699812	0.0201889	0.0237687	0.00495906		0.00237902	0.00193827	0.00219704	0.00155693		0.102994	0.0286484	0.0387333	0.0158261		0.152081	0.0166836	0.00643775	0.00181358			0.00879702	0.00879702	0.00104718	0.00104718
C5H7O2+	99.0441	2	1.03096	0.289658	0.528168	0.230243		1.42965	0.171156	0.539383	0.0880419		1.85118	0.229328	1.38307	0.612209		1.23224	0.185551	0.534814	0.323257		1.06561	0.101074	0.0445882	0.00450068			2.16597	2.16597	0.242859	0.242859
C6H11O+	99.0804	2	0.789254	0.161515	0.41185	0.158151		0.246926	0.0165822	0.0957786	0.014919		0.525479	0.194299	0.493096	0.36736		0.759652	0.0888482	0.339393	0.198645		0.404842	0.0378495	0.0174089	0.00459992			0.137903	0.137903	0.0159841	0.0159841
C4H6NO2+	100.039	2	0.0875178	0.0351434	0.0404303	0.00643387		0.123647	0.0238796	0.0444369	0.00602468		0.0601656	0.0196054	0.0457598	0.0257669		0.0814619	0.0301573	0.0295	0.0113624		0.154462	0.0180855	0.00658227	0.000721166			0.0615391	0.0615391	0.00707433	0.00707433
C5H10NO+	100.076	2	0.000799772	0.00159954	0.000256471	0.000512943		0.00455382	0.00214669	0.00232362	0.00109536		0.0143726	0.00133504	0.0113449	0.00603655		0.0848212	0.0286331	0.0469976	0.0379186		0.234016	0.00839385	0.0101021	0.00155523			0.0210152	0.0210152	0.00245836	0.00245836
C4H5O3+	101.023	2	1.52159	0.629478	0.812677	0.365126		0.824508	0.140906	0.296889	0.0329906		0.54574	0.191126	0.374997	0.118968		0.463969	0.181632	0.272032	0.236951		0.480035	0.0694603	0.0211777	0.00470158			0.782701	0.782701	0.0853435	0.0853435
C5H9O2+	101.06	2	1.41017	0.130408	0.760048	0.296592		0.806359	0.0601485	0.311386	0.0443025		1.51241	0.0441133	1.23506	0.669012		1.21625	0.227423	0.504904	0.250747		0.80286	0.0249537	0.0354442	0.00609953			1.39046	1.39046	0.158881	0.158881
C6H13O+	101.096	2	0.173948	0.0348778	0.0926331	0.0356656		0.0229583	0.010321	0.0104931	0.00433223		0.132032	0.0880999	0.14506	0.140886		0.220408	0.0337691	0.0992349	0.0566683		0.163012	0.0203441	0.00734473	0.00215178			0.101089	0.101089	0.012641	0.012641
C3H4NO3+	102.019	2	0.0637883	0.0306971	0.0327612	0.0134922		0.0190111	0.00443729	0.00676403	0.00107332		0.0185702	0.00815576	0.0128359	0.00506126		0.0370296	0.037211	0.0285924	0.0302851		0.0609684	0.00815446	0.002721	0.000459714			0.0152405	0.0152405	0.00173959	0.00173959
C4H8NO2+	102.055	2	0.0376663	0.00851935	0.0188858	0.00323734		0.0247091	0.000459168	0.00928911	0.000669433		0.021928	0.00297274	0.0182692	0.0110291		0.063128	0.030368	0.0387632	0.0344535		0.111806	0.0103399	0.00499176	0.000667348			0.0280774	0.0280774	0.00321887	0.00321887
C5H12NO+	102.091	2	0.0207771	0.0052477	0.0105301	0.00248578		0.0294291	0.00585099	0.0108007	0.00151961		0.00907817	0.00260954	0.00836662	0.00557373		0.0539358	0.00990789	0.0272418	0.0191086		0.316875	0.0370497	0.0144863	0.00383724			0.0104743	0.0104743	0.00127028	0.00127028
C4H7O3+	103.039	3.15	0.337303	0.068791	0.182127	0.0794573		0.76805	0.0413825	0.295409	0.0270887		0.425831	0.123116	0.304831	0.101902		0.387773	0.111368	0.213423	0.177675		0.295764	0.0378782	0.0134251	0.00204636			0.7594	0.7594	0.0878089	0.0878089
C8H7+	103.054	2	0.0957537	0.0389239	0.050416	0.0241912		0.143418	0.0274716	0.0547529	0.0108084		0.0664096	0.0323857	0.0434191	0.0200109		0.0388622	0.00824851	0.0202316	0.0159431		0.0332265	0.0115907	0.00152981	0.000559548			0.447344	0.447344	0.0487908	0.0487908
C5H11O2+	103.075	2.38	0.284139	0.0214265	0.156142	0.0602493		0.0913435	0.0173493	0.0366775	0.007958		0.276177	0.0403377	0.24592	0.164303		0.211959	0.0255827	0.105793	0.0702411		0.189568	0.00871492	0.00876605	0.00187323			0.140549	0.140549	0.0163561	0.0163561
C3H6NO3+	104.034	2	0.069014	0.0220122	0.0348114	0.00658346		0.0349353	0.00376896	0.0133417	0.00121069		0.0341484	0.0115297	0.0254737	0.0117722		0.0734294	0.0484503	0.0503984	0.0492509		0.130414	0.0231244	0.0059925	0.00090695			0.0435466	0.0435466	0.00513562	0.00513562
C7H6N+	104.049	4.32	0.030212	0.0043095	0.0164707	0.005897		0.0783596	0.0182401	0.0289924	0.006487		0.0216574	0.00954078	0.0157018	0.00864217		0.0616004	0.0408976	0.0412426	0.0374797		0.0539056	0.0137072	0.00250623	0.000628499			0.0807516	0.0807516	0.00885997	0.00885997
C4H10NO2+	104.071	3.84	0.00794363	0.00285724	0.00408604	0.00117881		0.00503049	0.000330641	0.00204747	0.000314797		0.00359077	0.000421538	0.00292316	0.00151055		0.0210823	0.0180355	0.0156044	0.0157566		0.0201298	0.00185225	0.000933811	0.000115947			0.00508345	0.00508345	0.000585999	0.000585999
C3H5O4+	105.018	2	0.221541	0.111566	0.122943	0.0607335		0.220591	0.0612717	0.0786241	0.0155295		0.0364603	0.0205659	0.0249969	0.0108009		0.0465033	0.0467547	0.0369972	0.0392457		0.0387185	0.00462184	0.00181532	0.000164794			0.163816	0.163816	0.0176182	0.0176182
C7H5O+	105.033	2	0.00890529	0.00725294	0.00406965	0.00259103		0.0308841	0.00268701	0.0120355	0.00149251		0.0136639	0.00410062	0.0113493	0.00726509		0.0153238	0.0106045	0.0106375	0.0101935		0.0259775	0.00737335	0.00123282	0.000350188			0.0163086	0.0163086	0.00185347	0.00185347
C4H9O3+	105.055	2	0.0897947	0.0117693	0.0497228	0.0182349		0.0616647	0.00053265	0.0243304	0.00242375		0.0928084	0.0100811	0.0776643	0.0384113		0.071209	0.0152811	0.030158	0.0146361		0.158348	0.0178941	0.00749513	0.00109581			0.184385	0.184385	0.0219317	0.0219317
C8H9+	105.07	2.24	0.325473	0.138946	0.177927	0.0882259		0.290926	0.0375761	0.117367	0.0203504		0.171967	0.0594033	0.142222	0.0711232		0.175461	0.0139612	0.0895736	0.0610724		0.268422	0.0316413	0.0129213	0.00304388			0.954229	0.954229	0.110923	0.110923
C5H13O2+	105.091	2	0.0100604	0.00180677	0.00555886	0.00201619		0.00339447	0.000452179	0.00135681	0.000194822		0.00828143	0.00502035	0.00919762	0.00845587		0.00924881	0.00133849	0.00427587	0.00238596		0.0476073	0.00613141	0.00232199	0.000695187			0.023177	0.023177	0.002825	0.002825
C2H4NO4+	106.013	2	0.00336093	0.0019551	0.00162017	0.000620668		0.00329932	0.000663111	0.00123191	0.000162266		0.000964859	0.000338024	0.00073301	0.000339961		0.00279108	0.00280048	0.00223559	0.00235636		0.00499178	0.000880745	0.000238365	3.85516e-05			0.00235921	0.00235921	0.000276309	0.000276309
C3H8NO3+	106.05	2	0.00133482	0.000594031	0.000637113	8.0548e-05		0.0018692	6.4499e-05	0.000727005	5.7419e-05		0.00099463	0.000280959	0.000743934	0.000275006		0.00175229	0.00147859	0.00131295	0.00132505		0.00655981	0.00152206	0.000314007	8.10474e-05			0.00171421	0.00171421	0.000208022	0.000208022
C7H8N+	106.065	2	0.000585836	0.00117167	0.000199223	0.000398447		0.00590572	0.000855581	0.00221751	0.000315724		0.000552697	0.000719127	0.000207938	0.000246809		0.00956118	0.00960431	0.00767453	0.00811932		0.0306382	0.0107188	0.00147067	0.000450394			0.00804463	0.00804463	0.000891712	0.000891712
C3H7O4+	107.034	2	0.044228	0.018199	0.0234885	0.00759528		0.0353783	0.0102748	0.0133086	0.00282925		0.00949221	0.00587405	0.00881586	0.0079437		0.00870725	0.00739718	0.00663413	0.0067868		0.0647727	0.0227121	0.00313547	0.0010903			0.11673	0.11673	0.0133038	0.0133038
C7H7O+	107.049	2	0.728774	0.123488	0.40018	0.138179		1.20646	0.242965	0.479876	0.0987004		0.644556	0.136481	0.55887	0.341365		0.362902	0.156415	0.227434	0.196611		0.399057	0.101862	0.0198383	0.00580046			0.677842	0.677842	0.0780578	0.0780578
C8H11+	107.086	2.26	0.266421	0.0497047	0.15597	0.0665124		0.231821	0.0152018	0.0942838	0.0110136		0.159629	0.0764967	0.165873	0.123718		0.292641	0.0237216	0.145008	0.0896399		0.22412	0.0607211	0.0115356	0.00502359			1.38017	1.38017	0.17398	0.17398
C6H6NO+	108.044	2	0.0131761	0.00620631	0.00686619	0.00284344		0.0187397	0.00103838	0.0074	0.000651718		0.00585037	0.00456611	0.00706303	0.00713556		0.0409539	0.0262924	0.028721	0.0270972		0.267497	0.0774609	0.0131067	0.002863			0.0423652	0.0423652	0.00493509	0.00493509
C7H10N+	108.081	2	0.0112967	0.0110021	0.00573062	0.00478279		0.130764	0.0336636	0.0476335	0.00849344		0.031958	0.00414383	0.0291824	0.0192614		0.195379	0.0178978	0.10382	0.0744356		0.980315	0.261358	0.0479429	0.00938515			0.139012	0.139012	0.0173834	0.0173834
C6H5O2+	109.028	2.22	0.0621149	0.12423	0.021719	0.0434379		1.41097	0.0949735	0.569674	0.062596		0.344077	0.0808355	0.278366	0.125223		1.47482	1.48422	1.21994	1.29755		0.573975	0.103639	0.0296225	0.00760114			0.396101	0.396101	0.0488508	0.0488508
C7H9O+	109.065	2.34	0.466683	0.131757	0.269219	0.131438		0.636077	0.0409851	0.246431	0.0052773		1.05321	0.20593	0.926235	0.585895		0.67393	0.0300873	0.347575	0.230743		0.59097	0.0711799	0.0300633	0.00387943			0.90927	0.90927	0.110903	0.110903
C8H13+	109.101	2	0.120799	0.0258112	0.0749232	0.0403887		0.210622	0.0131844	0.0855597	0.00962507		0.106284	0.051962	0.113269	0.0835624		0.226711	0.0318453	0.107481	0.059071		0.229259	0.0297939	0.0120771	0.00376971			0.119193	0.119193	0.0161964	0.0161964
C5H4NO2+	110.024	2	0.000441923	0.000883846	0.000165901	0.000331802		0	0	0	0		0.000211359	0.000387738	0.000274426	0.000477283		0.000237247	0.000354849	3.94531e-05	5.49193e-05		0.0725382	0.0654978	0.0035844	0.00312529			0	0	0	0
C6H8NO+	110.06	2	0.00489413	0.00343569	0.00263997	0.00183828		0.0190678	0.00155796	0.00750062	0.000255357		0.01507	0.00486163	0.0153609	0.0125795		0.0293004	0.00675611	0.0169662	0.0136687		0.0852494	0.0160092	0.00434962	0.0004014			0.0192433	0.0192433	0.00236965	0.00236965
C7H12N+	110.096	2	0.00420241	0.000438377	0.00245035	0.000969224		0.0154375	0.00163365	0.00623025	0.000542768		0.0025742	0.00185659	0.00307029	0.00272583		0.0390269	0.0102565	0.0166867	0.00712515		0.154327	0.00610808	0.00817292	0.0018212			0.0078161	0.0078161	0.00103864	0.00103864
C6H7O2+	111.044	2	1.33265	0.478268	0.781551	0.424574		1.76285	0.202293	0.747138	0.120306		1.94396	0.483206	1.56928	0.692951		1.09086	0.0940161	0.594678	0.417164		1.01519	0.160483	0.0537598	0.0101541			1.52901	1.52901	0.190962	0.190962
C7H11O+	111.08	2	3.16887	0.275451	1.87233	0.745128		1.75764	0.0809798	0.725635	0.0739264		3.81865	0.473055	3.55283	2.22382		3.4494	0.330334	1.75585	1.06163		2.93766	0.293908	0.155652	0.0224018			2.24009	2.24009	0.280354	0.280354
C5H6NO2+	112.039	2	0.0285547	0.00929597	0.0157932	0.00552348		0.0303838	0.000504839	0.0125755	0.0010033		0.025378	0.0113059	0.0271705	0.0223616		0.055168	0.0216557	0.0354491	0.0297678		0.16419	0.0144307	0.00885751	0.00123286			0.026259	0.026259	0.00330028	0.00330028
C6H10NO+	112.076	2	0.0146501	0.00161399	0.00842889	0.00241379		0.0144456	0.000845831	0.00589352	0.000317513		0.0107507	0.00553002	0.0123181	0.0111571		0.0321973	0.0045357	0.0155559	0.00892042		0.0995368	0.00740287	0.00536126	0.000605982			0.012852	0.012852	0.00163148	0.00163148
C5H5O3+	113.023	2	0.0873507	0.0244216	0.0482453	0.0121583		0.273268	0.00800883	0.117424	0.0133696		0.153712	0.0176457	0.132424	0.0601007		0.141223	0.0727142	0.0965804	0.0872519		0.209749	0.0297524	0.0115201	0.00219482			0.243337	0.243337	0.0307896	0.0307896
C6H9O2+	113.06	2	2.31034	0.156609	1.3785	0.487199		2.92633	0.0992572	1.20764	0.0834266		3.39032	0.303003	3.0573	1.71443		1.71396	0.451639	0.758822	0.353899		1.55552	0.159109	0.0849341	0.00823126			4.31964	4.31964	0.552269	0.552269
C7H13O+	113.096	2	0.190579	0.0300662	0.111831	0.0363252		0.0862321	0.00574258	0.037889	0.00575235		0.138442	0.0589026	0.152433	0.120668		0.213538	0.0254212	0.107628	0.061568		0.136574	0.0136967	0.00767463	0.00200712			0.0695901	0.0695901	0.0093117	0.0093117
C8H17+	113.132	2	0.00215125	0.000806625	0.00118326	0.000380855		0.00528554	0.000375936	0.00211938	2.79719e-05		6.9793e-05	0.000156062	8.81846e-05	0.000197187		0.00602869	0.00204125	0.00251576	0.000976975		0.0161028	0.00136829	0.000904391	0.000225625			0.0223252	0.0223252	0.00305299	0.00305299
C4H4NO3+	114.019	2	0.0104928	0.00954814	0.00441186	0.00361708		0.0141973	0.00230093	0.00574149	0.000568343		0.0145588	0.00531124	0.0118596	0.00555567		0.0358128	0.0145399	0.0238059	0.0215606		0.0733294	0.0129443	0.0040342	0.000417722			0.0197937	0.0197937	0.00256673	0.00256673
C5H8NO2+	114.055	2	0.127637	0.0289827	0.0717901	0.0148761		0.061652	0.00730389	0.0268275	0.00436408		0.056477	0.0069773	0.05272	0.0305757		0.161577	0.0903329	0.113604	0.10156		0.473366	0.0458305	0.0265577	0.00435953			0.039916	0.039916	0.00518043	0.00518043
C6H12NO+	114.091	2	0.0108237	0.00582639	0.00584561	0.00238991		0.0148529	0.000306202	0.00626698	0.000470464		0.00570318	0.000576328	0.00524639	0.00272616		0.0359941	0.0122825	0.0225254	0.0178503		0.12946	0.00800057	0.00730521	0.00131003			0.0103423	0.0103423	0.00139996	0.00139996
C5H7O3+	115.039	2	0.225349	0.070776	0.127414	0.039822		0.45191	0.0100949	0.196768	0.0219924		0.413933	0.0628536	0.355471	0.145067		0.259845	0.0744536	0.129373	0.0804571		0.764717	0.0717655	0.0433584	0.00495824			0.545332	0.545332	0.0704929	0.0704929
C9H7+	115.054	2	0.107655	0.0215259	0.0611904	0.010596		0.142577	0.00432318	0.0605832	0.00520182		0.0792505	0.0279809	0.0601888	0.0152228		0.0556557	0.0438961	0.0439998	0.0436791		0.0614058	0.0335221	0.00365671	0.00209252			0.319179	0.319179	0.0400148	0.0400148
C6H11O2+	115.075	2	0.349572	0.0330661	0.214077	0.0817488		0.189011	0.00670912	0.0819948	0.0092103		0.373266	0.041557	0.36493	0.232252		0.304086	0.0416601	0.151846	0.0835176		0.307795	0.0192768	0.0175687	0.00254746			0.342566	0.342566	0.0441804	0.0441804
C7H15O+	115.112	3.27	0.0188275	0.00361344	0.0111934	0.00375021		0.010274	0.000774465	0.00449647	0.000617701		0.00870389	0.00623799	0.0111237	0.0113184		0.0306206	0.00545654	0.0177374	0.0123652		0.0204371	0.00235038	0.00119393	0.000330266			0.0120993	0.0120993	0.0016973	0.0016973
C4H6NO3+	116.034	2	0.0341254	0.0136106	0.0192938	0.00548098		0.0199936	0.00315148	0.00834406	0.000878948		0.015326	0.00392884	0.0133225	0.00672324		0.0304174	0.0167359	0.0220488	0.0201826		0.0818851	0.0118684	0.00468905	0.00051528			0.0181675	0.0181675	0.00238171	0.00238171
C5H10NO2+	116.071	2	0.0207157	0.00827339	0.0115123	0.00288064		0.0216617	0.00113774	0.00936297	0.000999922		0.0187366	0.00151087	0.017142	0.00915505		0.038796	0.0195361	0.0273133	0.0243124		0.105368	0.00812358	0.00611405	0.000869492			0.0193119	0.0193119	0.00254401	0.00254401
C6H14NO+	116.107	2	0.00646333	0.00131619	0.00373984	0.000807588		0.0176884	0.00405085	0.00731234	0.00118026		0.00433369	0.000913888	0.00437218	0.00265041		0.025678	0.00271449	0.0142276	0.00934177		0.181529	0.013307	0.0107263	0.00255426			0.00601738	0.00601738	0.000830681	0.000830681
C4H5O4+	117.018	2	0.0455037	0.023047	0.0273988	0.0126478		0.0194588	0.0089653	0.00701638	0.00285122		0.000476469	0.000743684	0.000773356	0.00128364		0.0222261	0.0223758	0.0197527	0.0210294		0.0289455	0.00655779	0.00173008	0.000490756			0.0185075	0.0185075	0.00223203	0.00223203
C8H5O+	117.033	2	0.0325763	0.0160001	0.0172168	0.00416418		0	0	0	0		0.00269692	0.0040308	0.00397065	0.00569269		0.00581281	0.00631586	0.00536655	0.0063847		0.130376	0.104313	0.007291	0.0055333			0.0306788	0.0306788	0.00407199	0.00407199
C5H9O3+	117.055	2	0.308751	0.266197	0.182308	0.155953		2.37466	0.132765	1.07304	0.144737		1.47865	0.276048	1.32925	0.699278		0.725077	0.178482	0.349792	0.193625		1.03551	0.184004	0.0604571	0.010121			1.19347	1.19347	0.15647	0.15647
C9H9+	117.07	2	0.364664	0.0565725	0.217163	0.0547495		0.594711	0.062466	0.264752	0.0404267		0.278839	0.106571	0.219248	0.0949832		0.161778	0.0177144	0.0933809	0.0658731		0.1124	0.0650774	0.00673197	0.00362798			3.48518	3.48518	0.436257	0.436257
C6H13O2+	117.091	2	0.0663244	0.00874232	0.0408581	0.0143817		0.0164596	0.00476687	0.00772874	0.00223167		0.0437103	0.0259928	0.0539165	0.0492073		0.0483623	0.0122053	0.0225775	0.0101349		0.0895522	0.00563906	0.00538277	0.00128935			0.140545	0.140545	0.0178595	0.0178595
C7H17O+	117.127	2	0.00121442	0.00050335	0.000694441	0.000231935		0.00299849	0.00110536	0.0015778	0.000586938		6.55647e-06	1.46607e-05	8.57935e-06	1.9184e-05		0.00115705	0.00119656	0.000237757	0.000238058		4.62265e-05	9.24531e-05	3.14296e-06	6.28591e-06			0.0159099	0.0159099	0.00201219	0.00201219
C3H4NO4+	118.013	2	0.00421855	0.00210705	0.00247808	0.000971648		0.00316786	0.00087686	0.00128595	0.00025326		0.000748209	0.000524727	0.000497985	0.000154871		0.00964763	0.00969959	0.00863416	0.00915834		0.0110177	0.00218449	0.000653697	0.000135107			0.0017547	0.0017547	0.000219561	0.000219561
C4H8NO3+	118.05	2	0.0131009	0.00344261	0.00748882	0.000981496		0.0138089	0.00129218	0.00617756	0.000748951		0.0120931	0.00305042	0.0124332	0.00916609		0.014679	0.00430455	0.00951882	0.00777076		0.0365846	0.00828418	0.0021574	0.000439911			0.0134885	0.0134885	0.00181295	0.00181295
C8H8N+	118.065	2	0.00570141	0.00101069	0.00339044	0.000793336		0.0188924	0.00536219	0.00770044	0.00209841		0.00546263	0.004577	0.00307661	0.001606		0.0211933	0.00782145	0.0143294	0.0119571		0.0767844	0.0231048	0.00454694	0.00113958			0.130949	0.130949	0.0165895	0.0165895
C5H12NO2+	118.086	2	0.00967698	0.00325622	0.00567626	0.00161498		0.00631041	0.000824238	0.00279224	0.000442408		0.00329988	0.00109175	0.00297764	0.00141438		0.0155695	0.00815224	0.0111798	0.00979736		0.0367508	0.00216809	0.00223865	0.000484879			0.0150261	0.0150261	0.00194782	0.00194782
C4H7O4+	119.034	2	0.0745134	0.0322487	0.046222	0.019742		0.0648701	0.0117708	0.0274186	0.00321658		0.0229361	0.0125916	0.0167676	0.00388033		0.0154178	0.012188	0.0127942	0.0128592		0.0630215	0.0111363	0.00384789	0.000896162			0.0845597	0.0845597	0.0106826	0.0106826
C8H7O+	119.049	2	0.11775	0.0176409	0.0717696	0.0204368		0.0874475	0.0151626	0.0401072	0.00805289		0.0885434	0.0127082	0.0886683	0.0537485		0.0557207	0.00603207	0.0292033	0.0170857		0.0738898	0.0144377	0.00455177	0.0011387			0.16757	0.16757	0.0224517	0.0224517
C5H11O3+	119.07	2	0.04913	0.00389705	0.0307036	0.0104614		0.0366661	0.0011595	0.0161729	0.00123353		0.052606	0.00407174	0.0496335	0.026643		0.0312125	0.00477747	0.0156517	0.00825396		0.109366	0.00798725	0.00667626	0.000905596			0.16617	0.16617	0.0223843	0.0223843
C9H11+	119.086	2	0.159386	0.0276036	0.101412	0.0389126		0.193041	0.019063	0.0896848	0.0151118		0.0946024	0.0323596	0.0961798	0.0547342		0.106925	0.00417681	0.0589169	0.0368723		0.222099	0.0371257	0.0137576	0.00354353			0.75071	0.75071	0.101726	0.101726
C6H15O2+	119.107	2	0.00779182	0.000459386	0.00487025	0.0016346		0.00239189	0.00138715	0.00120287	0.000576629		0.00319287	0.00152687	0.00377256	0.00303741		0.00487052	0.000384988	0.0026794	0.00164711		0.0130342	0.00191196	0.000822248	0.000264706			0.0267982	0.0267982	0.00373416	0.00373416
C3H6NO4+	120.029	2	0.00832136	0.0038771	0.00489241	0.00172003		0.00316581	0.000597948	0.00135132	0.000168741		0.00180125	0.000830054	0.00141292	0.000439922		0.00887305	0.00892262	0.0080797	0.0085751		0.00962789	0.00209638	0.000583681	6.82331e-05			0.00301191	0.00301191	0.000403799	0.000403799
C7H6NO+	120.044	2	0.0010237	0.00204741	0.000394447	0.000788895		0.010542	0.000978287	0.00442341	4.78597e-05		0.00410516	0.00180551	0.00444505	0.00392484		0.00728858	0.00740009	0.00669586	0.00726414		0.0270998	0.00509047	0.0016443	0.00011645			0.00734851	0.00734851	0.000974438	0.000974438
C4H10NO3+	120.066	2	0.00396634	0.00587232	0.00188998	0.00220831		0.0290319	0.00247483	0.0128939	0.00112392		0.00813756	0.00252935	0.00677239	0.00233992		0.0144945	0.0110544	0.0119351	0.0118961		0.0689624	0.0189597	0.00432707	0.00152627			0.00577888	0.00577888	0.000788281	0.000788281
C8H10N+	120.081	2	0.0064144	0.00341864	0.00383535	0.00175799		0.0159381	0.000521829	0.00696641	0.000396353		0.00401758	0.000879718	0.00417197	0.00271171		0.019061	0.0037983	0.011992	0.00944502		0.0806688	0.01592	0.00487789	0.000223798			0.0307049	0.0307049	0.00418283	0.00418283
C7H5O2+	121.028	2	0.00248748	0.00302724	0.00122553	0.00114261		0.0159146	0.00238497	0.00685732	0.000617471		0.00735857	0.00205919	0.00651514	0.00289814		0.00648797	0.000783117	0.0038419	0.00269672		0.0116063	0.00395076	0.000740526	0.000315964			0.00891639	0.00891639	0.00121095	0.00121095
C4H9O4+	121.05	2	0.00454543	0.00552182	0.00241982	0.00225913		0.0517335	0.00810604	0.0232149	0.00303539		0.0204836	0.00562942	0.0195034	0.011734		0.00438383	0.00448449	0.00117145	0.000703731		0.0806937	0.0272393	0.00500344	0.00180101			0.111996	0.111996	0.0150115	0.0150115
C8H9O+	121.065	3.54	0.0678438	0.0253052	0.0430694	0.0231943		0.129857	0.0185613	0.0576662	0.00897356		0.0987225	0.0116566	0.0939066	0.0487506		0.112447	0.014166	0.0684495	0.049408		0.140201	0.0339796	0.0086875	0.00158007			0.0837387	0.0837387	0.0109694	0.0109694
C9H13+	121.101	2.4	0.13482	0.0500658	0.0958336	0.0607711		0.125572	0.00304847	0.0578644	0.00673507		0.073987	0.0385926	0.0907006	0.074711		0.138992	0.0133387	0.078962	0.0495405		0.128201	0.0287814	0.00839063	0.0032043			0.486865	0.486865	0.0711319	0.0711319
C3H8NO4+	122.045	2	0.00362762	0.00174154	0.00205745	0.000745649		0.00912286	0.000535255	0.0040019	0.000127973		0.00342232	0.00176931	0.00256237	0.00052988		0.00326402	0.00327365	0.00301151	0.00316944		0.0265726	0.0165258	0.00163569	0.000994899			0.00925278	0.00925278	0.00121256	0.00121256
C7H8NO+	122.06	2	0.0052022	0.00250164	0.00311321	0.00153155		0.0235634	0.00324277	0.0101579	0.00135887		0.0072033	0.00186337	0.00706035	0.00452532		0.0220502	0.00831865	0.0155151	0.0131446		0.237904	0.0570309	0.0150167	0.0026252			0.126669	0.126669	0.0162792	0.0162792
C8H12N+	122.096	2	0.00192962	0.00312006	0.000950718	0.00126371		0.0298897	0.00495173	0.0128292	0.00123916		0.00979259	0.0055015	0.0124408	0.0122807		0.0517687	0.00372786	0.0308092	0.0214244		0.215099	0.0394695	0.0135748	0.001605			0.0444415	0.0444415	0.00653737	0.00653737
C3H7O5+	123.029	2	0.0112048	0.00362516	0.00682729	0.00174287		0.00649282	0.00435417	0.00274129	0.00152572		0.00284663	0.00304407	0.00426011	0.00522618		0.000624112	0.000679378	0.000606344	0.000722846		0.0180731	0.00914946	0.00116785	0.000640691			0.0410414	0.0410414	0.00521665	0.00521665
C7H7O2+	123.044	2	0.124052	0.202523	0.061028	0.0820661		1.23568	0.149289	0.564214	0.082185		0.48569	0.0983296	0.453551	0.227951		0.297659	0.0392001	0.18224	0.133835		0.31453	0.118738	0.0209236	0.0098549			0.413883	0.413883	0.0562906	0.0562906
C4H11O4+	123.065	2	0.00615944	0.00318373	0.00372229	0.00155166		0.0082494	0.000393542	0.00392092	0.00054348		0.0067237	0.00709627	0.0102231	0.0127974		0.00258673	0.0023398	0.000750549	0.000288726		0.0301624	0.0161125	0.0018951	0.000873498			0.020336	0.020336	0.00279407	0.00279407
C8H11O+	123.08	2	0.17349	0.0408688	0.113551	0.0534815		0.297084	0.0156404	0.132015	0.00508538		0.445952	0.0860797	0.453145	0.304069		0.241955	0.0365852	0.125605	0.0668274		0.377156	0.0672141	0.0244873	0.00417986			0.365659	0.365659	0.0505619	0.0505619
C9H15+	123.117	2	0.0470278	0.0142355	0.0339055	0.0210413		0.109263	0.0032496	0.0494964	0.00328581		0.0243475	0.0141358	0.0301223	0.0225824		0.0875531	0.0123758	0.0464395	0.025034		0.127599	0.0178358	0.00859544	0.00280454			0.0366387	0.0366387	0.00569306	0.00569306
C6H6NO2+	124.039	4.36	0.000527977	0.00105595	0.000210264	0.000420528		9.72595e-05	6.37347e-05	4.46101e-05	2.33586e-05		0.000499165	0.000687333	0.000792913	0.00109294		0.000854153	0.000522113	0.00063048	0.000574561		0.00801167	0.00256	0.0005115	0.000117602			0.000979812	0.000979812	0.000130585	0.000130585
C7H10NO+	124.076	2	0.00382163	0.00319195	0.00232944	0.00190653		0.0116669	0.000409874	0.00526192	0.000280403		0.00949642	0.00388243	0.0114167	0.0101686		0.0188291	0.00531316	0.0128263	0.0103892		0.062694	0.0101601	0.00409501	0.000377195			0.00968276	0.00968276	0.0013483	0.0013483
C8H14N+	124.112	2	0.00271271	0.000394695	0.00184154	0.000909332		0.0087684	0.00125328	0.00395467	0.000403685		0.00246595	0.00152321	0.00321455	0.00270872		0.0198864	0.00511239	0.00980431	0.00435335		0.0782183	0.00275674	0.0052657	0.00111317			0.00273104	0.00273104	0.000405722	0.000405722
C6H5O3+	125.023	2	0.0215571	0.0431142	0.00865366	0.0173073		0.291985	0.0139242	0.140881	0.0187805		0.137141	0.0221909	0.132825	0.0619562		0.204628	0.179396	0.183662	0.190369		0.132618	0.0607438	0.00931124	0.00516805			0.176722	0.176722	0.0246634	0.0246634
C3H9O5+	125.044	2	0.0205604	0.0219472	0.0119641	0.0106496		0.0126133	0.00829844	0.00584593	0.00307131		0.0309101	0.0362209	0.0485033	0.062072		0.000708599	0.00116045	0.000772969	0.00128723		0.103601	0.0850024	0.00668935	0.0053276			0.146492	0.146492	0.0203369	0.0203369
C8H13O+	125.096	2	0.488119	0.0514524	0.326366	0.13833		0.332118	0.0136147	0.15142	0.0107354		0.618198	0.0884806	0.646048	0.410852		0.500697	0.0597537	0.282316	0.165162		0.50059	0.0593431	0.0338048	0.00578691			0.362613	0.362613	0.0512029	0.0512029
C9H17+	125.132	2	0.0119997	0.00183166	0.00827455	0.00413694		0.0287826	0.00124319	0.0132074	0.000808673		0.000244678	0.000537608	0.000339012	0.000753344		0.0167373	0.00379107	0.00838052	0.00391434		0.0488131	0.0058442	0.00338569	0.0010237			0.0309053	0.0309053	0.00477008	0.00477008
C5H4NO3+	126.019	2	0.0668778	0.00958729	0.0431735	0.0127678		0.00569731	0.00353395	0.00297876	0.00151316		0.0217046	0.00824607	0.0207422	0.0112781		0.0807723	0.0512807	0.065133	0.0599509		0.208357	0.0178414	0.0142429	0.00189653			0.00793826	0.00793826	0.00113829	0.00113829
C6H8NO2+	126.055	2	0.00868616	0.00675301	0.00519398	0.00376178		0.0269386	0.00274161	0.0123749	0.000936153		0.0196055	0.00388382	0.0212068	0.0147261		0.0292168	0.00678287	0.0195956	0.0151978		0.0902436	0.0144833	0.0061485	0.0011414			0.0214526	0.0214526	0.00302415	0.00302415
C7H12NO+	126.091	2	0.00291791	0.000986315	0.00184875	0.000713871		0.0049557	0.000190237	0.00227698	0.000154847		0.00344762	0.00139095	0.00422004	0.0034945		0.0115234	0.00066224	0.00670874	0.00426123		0.040522	0.00333582	0.00277047	0.000342068			0.00369387	0.00369387	0.000529021	0.000529021
C6H7O3+	127.039	2	0.0162422	0.0324843	0.00662605	0.0132521		0.846237	0.0904636	0.395756	0.0362053		0.184157	0.0402137	0.173417	0.0784451		0.0660518	0.036174	0.0522843	0.0485984		0.112802	0.0658486	0.00813735	0.00554322			0.160951	0.160951	0.0230122	0.0230122
C10H7+	127.054	2	0.00323186	0.00646372	0.00131861	0.00263722		0.111128	0.0121394	0.0509948	0.00353552		0.00756645	0.00817651	0.00400847	0.002845		0.00521309	0.00527955	0.00506143	0.00546336		0.00634694	0.00534213	0.000469234	0.00041779			0.0329829	0.0329829	0.00467707	0.00467707
C7H11O2+	127.075	2	0.142473	0.114921	0.089631	0.0711141		0.505415	0.022615	0.233056	0.0106956		0.553977	0.0865683	0.5559	0.32131		0.266107	0.0523265	0.138835	0.0714918		0.294548	0.0320479	0.0204098	0.00250309			0.504486	0.504486	0.0725319	0.0725319
C8H15O+	127.112	2	0.0498806	0.00574621	0.0330824	0.0107233		0.0435459	0.00443387	0.0210244	0.00314487		0.0246958	0.0110629	0.0304272	0.023796		0.0528072	0.0068119	0.0288795	0.0155771		0.0616242	0.00647748	0.00436498	0.00105416			0.0331526	0.0331526	0.00501203	0.00501203
C5H6NO3+	128.034	2	0.00980715	0.00445492	0.00566401	0.000964971		0.0202811	0.00303129	0.00962067	0.00120265		0.0142321	0.00248783	0.0145978	0.00866667		0.0168114	0.00447301	0.0117089	0.00956212		0.0519676	0.0133592	0.00360555	0.000831143			0.0132418	0.0132418	0.00192895	0.00192895
C9H6N+	128.049	2	0.00833314	0.00179175	0.00535002	0.00154451		0.0108802	0.00124992	0.00499575	0.000596767		0.00654512	0.00606156	0.00388636	0.00173358		0.00528847	0.00529344	0.00509977	0.00531872		0.0285226	0.00693336	0.00207084	0.000714774			0.0405411	0.0405411	0.00552904	0.00552904
C6H10NO2+	128.071	2	0.0179024	0.00690925	0.0111809	0.0036985		0.0228924	0.00138083	0.0104974	0.000610855		0.0151087	0.00321447	0.0143618	0.00678146		0.0346175	0.0161377	0.0265377	0.0234846		0.10333	0.0158884	0.00730463	0.00129529			0.0247772	0.0247772	0.00344031	0.00344031
C7H14NO+	128.107	2	0.00679882	0.00230266	0.00430132	0.00137108		0.00738125	0.000191594	0.00346242	0.000221336		0.00285971	0.000512476	0.0028076	0.00126473		0.0166596	0.00526639	0.011534	0.00897893		0.0767863	0.00452274	0.00546903	0.000950948			0.00701635	0.00701635	0.00101827	0.00101827
C5H5O4+	129.018	2	0.0359308	0.0156476	0.0230186	0.00790666		0.0632166	0.0124733	0.0288354	0.00372755		0.0202966	0.0108059	0.0163531	0.00416616		0.0207422	0.0205049	0.0202006	0.021367		0.0345079	0.00710557	0.00251401	0.000719682			0.0295917	0.0295917	0.00422059	0.00422059
C6H9O3+	129.055	2	0.0341371	0.0429542	0.0197801	0.0198677		0.29345	0.012499	0.145298	0.0181421		0.191591	0.0222452	0.191318	0.0965164		0.064576	0.018692	0.0339782	0.018894		0.140206	0.0238728	0.0100908	0.00212363			0.245484	0.245484	0.0351459	0.0351459
C10H9+	129.07	2	0.198799	0.0427347	0.133595	0.0555935		0.33894	0.0962061	0.153762	0.0415159		0.186865	0.0370208	0.192562	0.10695		0.0559397	0.0234059	0.0425177	0.0368838		0.105463	0.031564	0.0074635	0.00186405			1.89816	1.89816	0.251506	0.251506
C7H13O2+	129.091	2	0.0694751	0.00990746	0.0465782	0.0166341		0.0638382	0.00793338	0.0299779	0.004081		0.080605	0.00847868	0.0848329	0.0499086		0.0590933	0.00730187	0.0332652	0.0184859		0.0951462	0.0095914	0.00684523	0.00108111			0.206143	0.206143	0.0283697	0.0283697
C8H17O+	129.127	2	0.0105978	0.00218719	0.00686685	0.0016724		0.0141739	0.00114495	0.00679065	0.000805229		0.00202792	0.00156718	0.0029647	0.00303329		0.0199782	0.00196519	0.0113649	0.00652068		0.0261248	0.00306999	0.00192976	0.000563295			0.0255921	0.0255921	0.00390579	0.00390579
C4H4NO4+	130.013	2	0.0074323	0.00377338	0.00487729	0.00206709		0.00381034	0.000829316	0.00174034	0.000253287		0.00244737	0.000906857	0.00224288	0.000990067		0.00760882	0.00418574	0.00622024	0.00577514		0.0162339	0.00299438	0.00118065	0.000275341			0.00115453	0.00115453	0.000168669	0.000168669
C5H8NO3+	130.05	2	0.00693472	0.00302459	0.00412142	0.000661427		0.0107953	0.00146402	0.00507504	0.000461175		0.00636107	0.00217662	0.0057483	0.00220793		0.0070254	0.00325066	0.0054723	0.00487423		0.0395542	0.00592598	0.00288847	0.000598075			0.00459673	0.00459673	0.000694437	0.000694437
C9H8N+	130.065	2	0.00573276	0.00197244	0.00369604	0.00135656		0.0140587	0.00182464	0.00619304	0.000370226		0.00721775	0.00233203	0.00695991	0.00374694		0.0118564	0.00764448	0.0101221	0.0097727		0.0367117	0.0088005	0.00263637	0.000467355			0.0613711	0.0613711	0.00836367	0.00836367
C6H12NO2+	130.086	2	0.0107247	0.00567455	0.00679162	0.00295845		0.0192856	0.00138288	0.00911481	0.00083798		0.0110354	0.00169737	0.0109233	0.00524743		0.0184421	0.00944001	0.0146471	0.0131134		0.0670513	0.00825962	0.00490654	0.000866113			0.0183158	0.0183158	0.00262926	0.00262926
C7H16NO+	130.123	2	0.00346707	0.000977079	0.00219904	0.00040293		0.00373299	0.000557731	0.00177898	0.000202651		0.0013067	0.000463845	0.00154055	0.0010617		0.00744516	0.00273725	0.00534224	0.00422109		0.0377381	0.00496061	0.00279053	0.000662055			0.00453594	0.00453594	0.000717368	0.000717368
C5H7O4+	131.034	2	0.0241091	0.00903705	0.0155416	0.00420421		0.0474648	0.0056187	0.0224231	0.00166168		0.0166596	0.00471323	0.0152973	0.00530628		0.01282	0.00789094	0.0108371	0.0102828		0.0652943	0.0129104	0.00487661	0.00135437			0.0564133	0.0564133	0.00811846	0.00811846
C9H7O+	131.049	2	0.0370825	0.015051	0.0229099	0.00518087		0.0948517	0.0155542	0.0432859	0.00389762		0.0372867	0.00906068	0.0426646	0.0307711		0.0192278	0.0147938	0.0171267	0.0170514		0.0725869	0.0193625	0.0053161	0.0013525			0.0578126	0.0578126	0.00839111	0.00839111
C6H11O3+	131.07	2	0.147044	0.0160706	0.103573	0.0450537		0.12796	0.0057298	0.0618641	0.00431322		0.125796	0.0355237	0.117636	0.0482167		0.059539	0.00687663	0.0345256	0.0205322		0.113526	0.0169505	0.00832134	0.000972024			0.229369	0.229369	0.0335863	0.0335863
C10H11+	131.086	2	0.129312	0.00867699	0.0888159	0.0301389		0.130783	0.0254704	0.0650582	0.0135097		0.0927849	0.0210084	0.0982255	0.0516577		0.0613621	0.00827864	0.0399672	0.0277263		0.109139	0.0374537	0.00809389	0.00260535			0.519535	0.519535	0.0770361	0.0770361
C7H15O2+	131.107	2	0.0245652	0.00251243	0.0168088	0.00552544		0.0109083	0.00169629	0.00544657	0.000997894		0.0120098	0.00728752	0.0166322	0.015153		0.0171834	0.00340744	0.00932229	0.00456557		0.0354677	0.00300897	0.00267927	0.00065841			0.0560937	0.0560937	0.00838805	0.00838805
C4H6NO4+	132.029	2	0.00569887	0.00257583	0.00345649	0.000689167		0.00877329	0.00118188	0.0042062	0.000397813		0.00375474	0.00136472	0.00341692	0.00126074		0.00735859	0.00218135	0.00535526	0.00448009		0.0277945	0.00586417	0.00206502	0.000445698			0.00464761	0.00464761	0.000685447	0.000685447
C5H10NO3+	132.066	2	0.00319994	0.00216793	0.00195024	0.00109481		0.00841193	0.000503778	0.00416422	0.000398911		0.00463445	0.000642972	0.00468372	0.00227845		0.00535549	0.00274197	0.00432057	0.00391948		0.0408079	0.00774137	0.00305505	0.000675054			0.00631743	0.00631743	0.000940597	0.000940597
C9H10N+	132.081	2	0.00108971	0.000902828	0.00063166	0.000323607		0.00658958	0.00077486	0.00300905	0.00029535		0.00235407	0.000571547	0.00224585	0.000892441		0.0177704	0.00691619	0.0136666	0.0119151		0.067367	0.0151925	0.00498642	0.000827531			0.0229089	0.0229089	0.00336145	0.00336145
C6H14NO2+	132.102	2	0.00420507	0.000661377	0.0028234	0.00077294		0.0032063	0.000187365	0.00156259	0.000154644		0.00150971	0.000242717	0.001579	0.000785252		0.00435563	0.00270398	0.00365236	0.00329892		0.0142008	0.00160494	0.00109197	0.000287584			0.00439676	0.00439676	0.000662013	0.000662013
C8H5O2+	133.028	2	0.00114447	0.0022738	0.000489242	0.000971603		0.00180465	0.000761268	0.0011846	0.000516169		0	0	0	0		0.0035343	0.00368983	0.00365673	0.00414543		0.0190542	0.00790536	0.00144356	0.000596247			0.00587572	0.00587572	0.000833575	0.000833575
C5H9O4+	133.05	2	0.0304462	0.0088175	0.0195071	0.00246931		0.085563	0.0118089	0.0409876	0.00363806		0.0333129	0.00858498	0.0332083	0.0164746		0.0187047	0.0187987	0.0188824	0.0200077		0.0746532	0.0107921	0.00573179	0.00129005			0.0858482	0.0858482	0.0126106	0.0126106
C9H9O+	133.065	2	0.154631	0.0159895	0.106845	0.0350271		0.183937	0.0152796	0.0945866	0.0145079		0.197437	0.0392382	0.224737	0.150483		0.0923385	0.0198193	0.0638904	0.0480494		0.172046	0.0441127	0.0131066	0.00317276			0.343559	0.343559	0.052198	0.052198
C6H13O3+	133.086	2	0.0199989	0.00186456	0.0141323	0.00543774		0.00955665	0.000475803	0.00481863	0.000522074		0.0129846	0.0024047	0.0150055	0.0105144		0.00741058	0.00113017	0.00415665	0.0022158		0.0284204	0.00867439	0.00211815	0.000495642			0.0484873	0.0484873	0.00729376	0.00729376
C10H13+	133.101	2	0.149947	0.0280587	0.110377	0.0576926		0.0970383	0.0149272	0.0487991	0.00868084		0.042655	0.0155896	0.0485026	0.0267104		0.0467223	0.00286501	0.0285213	0.0175692		0.145197	0.0279875	0.0112461	0.00303026			0.213269	0.213269	0.0332382	0.0332382
C6H15NO2+	133.11	2	0.0230144	0.00452547	0.0170309	0.00926868		0.0239278	0.00537125	0.0116993	0.00257846		0.00788314	0.00670417	0.00587099	0.00435159		0.00173321	0.00184649	0.00164761	0.00165914		0.0198469	0.0115037	0.00154121	0.00084923			0.0455998	0.0455998	0.00695626	0.00695626
C7H17O2+	133.122	2	0.00410902	0.000642496	0.00295187	0.00135371		0.00227182	0.00038156	0.00113798	0.000211083		0.000715758	0.000393822	0.000957676	0.000753556		0.00164666	0.000121512	0.0009799	0.000572527		0.00439943	0.000972663	0.000350775	0.000135725			0.00818007	0.00818007	0.00130168	0.00130168
C8H8NO+	134.06	2	0.00113451	0.00177262	0.000603758	0.000758846		0.00764385	0.000883693	0.00351733	0.000139556		0.00429458	0.001507	0.0053868	0.00465991		0.0101457	0.00686263	0.00906647	0.00885844		0.0345137	0.0129469	0.00262466	0.000866966			0.0124714	0.0124714	0.00185529	0.00185529
C5H12NO3+	134.081	2	0.00531468	0.0103833	0.00235533	0.00444379		0.0843513	0.00542483	0.0435097	0.00567127		0.0299388	0.00746847	0.030103	0.0153573		0.0261877	0.0143245	0.0215479	0.0197158		0.15671	0.0461874	0.0122281	0.00437288			0.00694495	0.00694495	0.00106938	0.00106938
C9H12N+	134.096	2	0.00423536	0.00468201	0.00280052	0.0028289		0.0237674	0.000750575	0.012066	0.00127697		0.00506992	0.002002	0.00452838	0.00143681		0.0083768	0.00319884	0.00650593	0.00570457		0.0290019	0.00680263	0.0022211	0.000440498			0.0110891	0.0110891	0.00171657	0.00171657
C4H7O5+	135.029	2	0.00624867	0.00241317	0.00431614	0.0015932		0.00546253	0.00110187	0.00255158	0.000320621		0.00148052	0.00094414	0.0021284	0.00208159		0.00241562	0.00243425	0.0024826	0.00264964		0.0146066	0.00203588	0.00114224	0.000187106			0.0217681	0.0217681	0.00306171	0.00306171
C8H7O2+	135.044	2	0.00808193	0.0154958	0.00368818	0.00665361		0.0825121	0.00890321	0.044853	0.00873798		0.0736488	0.0108501	0.0816873	0.0511271		0.029907	0.00481245	0.0181588	0.0115364		0.0610429	0.0137918	0.00479398	0.0012209			0.0584657	0.0584657	0.00891357	0.00891357
C5H11O4+	135.065	2	0.00610441	0.0106505	0.00305556	0.0045582		0.141224	0.0165122	0.0714727	0.00837125		0.0558724	0.014219	0.0587078	0.0340877		0.0122584	0.00571239	0.00619442	0.0032316		0.0867872	0.0332285	0.00678645	0.00301077			0.13784	0.13784	0.0207324	0.0207324
C9H11O+	135.08	2	0.0379052	0.025532	0.0270874	0.0214084		0.110076	0.00342035	0.0542504	0.00324964		0.100647	0.0136935	0.107373	0.0586954		0.0637908	0.00377479	0.0415128	0.0282568		0.128038	0.0252367	0.0099874	0.00165096			0.101641	0.101641	0.015223	0.015223
C6H15O3+	135.102	2	0.0103597	0.00250591	0.00782052	0.00430532		0.00245132	0.000627182	0.00123331	0.000252545		0.00822488	0.00230773	0.0100276	0.00793003		0.00567004	0.000796448	0.00337582	0.00213776		0.029279	0.0131093	0.00223222	0.000816525			0.0240786	0.0240786	0.00379062	0.00379062
C10H15+	135.117	2.45	0.0794423	0.0376483	0.0648102	0.0478782		0.104531	0.0127725	0.0519961	0.00734776		0.0244061	0.00961529	0.0309209	0.0210654		0.0493083	0.00440248	0.032039	0.0211308		0.0767021	0.00975034	0.00619344	0.00183828			0.108459	0.108459	0.017917	0.017917
C3H6NO5+	136.024	2	0.00043564	0.000871281	0.00019039	0.000380781		0.000996941	6.74807e-05	0.000480817	2.08804e-05		0.000181361	0.000138025	0.000122272	5.76246e-05		0.000900498	0.000890835	0.000927772	0.000994541		0.00269181	0.000567152	0.000208904	1.41659e-05			0.00101179	0.00101179	0.000144924	0.000144924
C7H6NO2+	136.039	2	0.000681746	0.00112861	0.000300792	0.000492886		0.00190231	0.00041924	0.000978752	0.000184823		0.00107632	0.000979538	0.00171059	0.00201568		0.00265978	0.00268744	0.00276109	0.00296547		0.0232935	0.00734072	0.00177679	0.000320578			0.00299372	0.00299372	0.000447334	0.000447334
C4H10NO4+	136.06	2	0.00187406	0.00308286	0.000922696	0.00131456		0.0136451	0.00122197	0.0067299	0.00040103		0.0040765	0.0030208	0.00284777	0.000968767		0.00535724	0.00536677	0.00550318	0.00576445		0.0294671	0.0107139	0.00232862	0.0008907			0.0113107	0.0113107	0.00168315	0.00168315
C8H10NO+	136.076	2	0.0012402	0.0018055	0.000683617	0.000779038		0.0103474	0.00150364	0.00484683	0.000323681		0.00504879	0.00105746	0.00591282	0.00415038		0.0132823	0.00455513	0.0102778	0.00879032		0.086505	0.0209546	0.00674666	0.000976773			0.0798578	0.0798578	0.0116952	0.0116952
C9H14N+	136.112	2	0.00615561	0.00643891	0.00552917	0.00619235		0.00950457	0.00137335	0.0047259	0.000508456		0.00272439	0.00134909	0.00375732	0.00321008		0.013666	0.000194307	0.00864974	0.00557057		0.070655	0.0137874	0.00551197	0.00037117			0.00780143	0.00780143	0.00127025	0.00127025
C4H9O5+	137.044	2	0.0049684	0.00322329	0.00396869	0.00318352		0.00671059	0.000160868	0.00348647	0.000392462		0.00301112	0.00249156	0.00469701	0.00510968		0.00108845	0.000481771	0.000550562	0.000286613		0.0129207	0.00694036	0.00103265	0.000589889			0.013221	0.013221	0.0019538	0.0019538
C8H9O2+	137.06	2	0.0539753	0.103988	0.0248623	0.0453625		0.514981	0.0300955	0.253996	0.00822337		0.316301	0.0670815	0.321071	0.143719		0.1547	0.0347494	0.112743	0.088626		0.199408	0.0607567	0.0165971	0.00665277			0.24557	0.24557	0.0377786	0.0377786
C5H13O4+	137.081	2	0.00263038	0.00341151	0.00159492	0.00163713		0.00851905	0.00117375	0.00421201	0.000379274		0.00569631	0.00384576	0.00843211	0.00902705		0.00241585	0.000578946	0.00151537	0.00109984		0.00856417	0.00687515	0.000651837	0.000483245			0.0105741	0.0105741	0.00162958	0.00162958
C9H13O+	137.096	2	0.209554	0.0528973	0.151219	0.0730971		0.358046	0.0121275	0.18144	0.0129768		0.488545	0.0896982	0.564938	0.391496		0.232622	0.0409498	0.132712	0.0675137		0.361273	0.0733895	0.0291799	0.00564308			0.343554	0.343554	0.0532675	0.0532675
C10H17+	137.132	2.37	1.66808	1.8602	1.52072	1.75045		1.08222	0.407113	0.566798	0.193387		0.0582857	0.032899	0.058804	0.0357942		0.0936195	0.00972942	0.0582119	0.0350966		0.165762	0.0280518	0.0138559	0.00479082			0.0140195	0.0140195	0.00232891	0.00232891
C7H8NO2+	138.055	2	0.00305785	0.00611569	0.00135649	0.00271298		0.00975623	0.00136225	0.00543061	0.00109286		0.0126166	0.00729166	0.0183246	0.0172174		0.0203247	0.00386151	0.0123447	0.00773952		0.0581845	0.0135012	0.00466253	0.000809408			0.0118012	0.0118012	0.00180435	0.00180435
C8H12NO+	138.091	2	0.00524027	0.0054234	0.00353032	0.00322796		0.0197186	0.0016571	0.00965411	0.000165449		0.0127525	0.00276928	0.0144596	0.00972618		0.0179686	0.00690998	0.0143731	0.0123303		0.0717345	0.011596	0.00583994	0.000835534			0.012164	0.012164	0.00189581	0.00189581
C9H16N+	138.128	2	0.137321	0.156402	0.125601	0.147219		0.0678231	0.00872424	0.036965	0.0070141		0.00894299	0.00531368	0.0128494	0.0106878		0.0331625	0.00884915	0.018007	0.0077608		0.144352	0.0163979	0.0118739	0.00183141			0.00546289	0.00546289	0.000870871	0.000870871
C7H7O3+	139.039	2	0.0243236	0.0486473	0.0108677	0.0217353		0.439007	0.0411317	0.22728	0.0222894		0.203559	0.0453087	0.211913	0.101359		0.101472	0.018025	0.0612917	0.0379898		0.152785	0.0404329	0.0129281	0.00463125			0.235528	0.235528	0.0367262	0.0367262
C8H11O2+	139.075	2	0.164613	0.158062	0.117928	0.113025		0.929214	0.1533	0.455375	0.0440262		0.647633	0.154361	0.682168	0.355303		0.142241	0.0115702	0.0904569	0.0590807		0.230648	0.0794898	0.0195795	0.00856935			0.758865	0.758865	0.118902	0.118902
C9H15O+	139.112	2	0.0929048	0.0137489	0.0689532	0.0305916		0.10416	0.00948749	0.0522069	0.00524133		0.10459	0.0160416	0.123478	0.0813033		0.0915465	0.0128236	0.0558102	0.0310639		0.112806	0.0124522	0.00945032	0.00164317			0.0985836	0.0985836	0.0155376	0.0155376
C10H19+	139.148	2	0.00248294	0.00130973	0.00190024	0.00147782		0.0104774	0.00376329	0.00495354	0.00135912		1.81198e-05	4.05172e-05	2.82065e-05	6.30716e-05		0.00393896	0.000710976	0.00226084	0.00111498		0.0210962	0.00274533	0.0018176	0.000578123			0.0105075	0.0105075	0.00177282	0.00177282
C6H6NO3+	140.034	2	0.00147607	0.00295214	0.000664253	0.00132851		0.00430679	0.000626994	0.00222468	0.00026148		0.0028692	0.00168035	0.00411823	0.00355389		0.0069589	0.00334225	0.00590422	0.00534867		0.0222169	0.00409991	0.00185524	0.00031667			0.00502959	0.00502959	0.000791969	0.000791969
C10H6N+	140.049	2	0.000966442	0.00169968	0.000462482	0.000759168		0.00959475	0.000250401	0.00493238	0.000346021		0.00951204	0.00985997	0.00600169	0.00435024		0.00219875	0.00220734	0.00233381	0.00246435		0.0194618	0.00551998	0.00163163	0.000517463			0.00927372	0.00927372	0.00146378	0.00146378
C7H10NO2+	140.071	2	0.00224946	0.00303956	0.00139287	0.00151701		0.0159909	0.00259024	0.00811379	0.000921258		0.00932997	0.00275761	0.0119587	0.00945545		0.0103606	0.0019089	0.00754643	0.00580684		0.0360938	0.00956194	0.00305733	0.000986329			0.0126909	0.0126909	0.00198151	0.00198151
C8H14NO+	140.107	2	0.00246975	0.00143849	0.00176333	0.00113711		0.00566634	0.000288196	0.00285207	0.0001277		0.00288883	0.000737267	0.0036219	0.00262794		0.00910475	0.000616659	0.00604408	0.00405708		0.0396018	0.00519972	0.00334876	0.000512566			0.00565306	0.00565306	0.000891247	0.000891247
C6H5O4+	141.018	2	0.0229464	0.0100039	0.0161662	0.00580153		0.0337597	0.00641177	0.0167637	0.0020149		0.00889669	0.00367179	0.00845822	0.00287378		0.0292011	0.0294286	0.0313544	0.0334706		0.0134877	0.00555458	0.0011592	0.000461732			0.0177976	0.0177976	0.00271343	0.00271343
C10H5O+	141.033	2	0.0036461	0.00193561	0.00226573	0.000705347		0.00288656	0.00191879	0.0014433	0.000781045		0.00297564	0.0037563	0.00546832	0.00748327		0.00353522	0.00356806	0.00380182	0.00407302		0.0232283	0.0139491	0.00195716	0.00114865			0.032375	0.032375	0.00495334	0.00495334
C7H9O3+	141.055	2	0.00416692	0.00833385	0.00188894	0.00377788		0.0852515	0.00461305	0.0446742	0.00362667		0.0817025	0.0209382	0.089415	0.0539757		0.017406	0.00189383	0.011086	0.00709905		0.0405267	0.011539	0.00351207	0.00124729			0.0588063	0.0588063	0.00932703	0.00932703
C11H9+	141.07	2	0.00559604	0.0111921	0.00253706	0.00507412		0.0782948	0.00738671	0.039722	0.00202175		0.0269668	0.0191893	0.0204852	0.00506622		0.0128555	0.013012	0.0138629	0.014946		0.0451752	0.00826242	0.00391966	0.00103813			0.0949817	0.0949817	0.0146504	0.0146504
C8H13O2+	141.091	2	0.0340661	0.0262031	0.024326	0.0197477		0.149967	0.0081892	0.0771583	0.00406826		0.140708	0.024739	0.160118	0.100423		0.0615345	0.0130534	0.0352375	0.0175519		0.0845782	0.0120873	0.00723883	0.00108575			0.11559	0.11559	0.0184622	0.0184622
C9H17O+	141.127	2	0.0158917	0.00177249	0.0117282	0.00410298		0.0191484	0.00341319	0.00993718	0.00182612		0.00348669	0.00162864	0.00448604	0.00281078		0.0166387	0.00174518	0.0102813	0.00578789		0.0277343	0.00374392	0.00241274	0.000546555			0.0154467	0.0154467	0.00262239	0.00262239
C10H21+	141.164	2	0.000173468	0.00031772	8.71388e-05	0.000142104		0.00256131	0.000327837	0.00128345	8.43671e-05		0	0	0	0		0.00227587	0.000153504	0.00154937	0.00104729		0.0115009	0.00103854	0.00100997	0.00026034			0.00891552	0.00891552	0.00151774	0.00151774
C5H4NO4+	142.013	2	0.0037397	0.00192116	0.00251977	0.000840465		0.00287054	0.000788312	0.00144042	0.000286712		0.00241723	0.000730183	0.00248878	0.00113747		0.00478766	0.00368616	0.00470857	0.00469108		0.0130388	0.00383379	0.00112906	0.000386945			0.00205756	0.00205756	0.000325313	0.000325313
C6H8NO3+	142.05	2	0.00133094	0.00249054	0.000627673	0.00112982		0.0101476	0.00121028	0.00527277	0.000478373		0.00845375	0.00199537	0.00942352	0.005695		0.00649574	0.0036363	0.00579552	0.00541365		0.0215472	0.0162671	0.00197827	0.00170675			0.0062043	0.0062043	0.000991877	0.000991877
C10H8N+	142.065	2	0.000684966	0.000728688	0.000450374	0.000394407		0.00589297	0.000262188	0.00306563	0.000176957		0.00196128	0.00189914	0.00122979	0.000677641		0.00139422	0.00140546	0.00150863	0.00161155		0.0100075	0.00311069	0.000894048	0.000365824			0.00664513	0.00664513	0.00104325	0.00104325
C7H12NO2+	142.086	2	0.00355312	0.00373519	0.00236758	0.00208009		0.0122595	0.00152061	0.00621111	0.000411778		0.00656053	0.00133235	0.00710726	0.00373756		0.0113674	0.00461966	0.00941794	0.00811893		0.0400847	0.00736162	0.0034997	0.000735585			0.00875291	0.00875291	0.0013835	0.0013835
C8H16NO+	142.123	2	0.00234325	0.00103703	0.00163588	0.000666445		0.00305656	8.51294e-05	0.00158957	9.98019e-05		0.00100677	0.000252468	0.00118159	0.00061596		0.00707526	0.00247086	0.00558443	0.00446832		0.0378301	0.00219924	0.00332276	0.00058434			0.00263248	0.00263248	0.000439517	0.000439517
C6H7O4+	143.034	2	0.00628657	0.00622573	0.00326602	0.00291934		0.0794516	0.00637514	0.0420309	0.00348761		0.0255684	0.00838168	0.0259848	0.0107885		0.0134372	0.00797613	0.0122038	0.011608		0.0347783	0.0254438	0.00323653	0.00272385			0.0493584	0.0493584	0.00780584	0.00780584
C10H7O+	143.049	2	0.00140621	0.00174345	0.000712867	0.000796213		0.0204241	0.00148041	0.0103156	0.00024128		0	0	0	0		0.00228503	0.00231895	0.00250404	0.00271419		0.00768063	0.00722068	0.000762266	0.000744601			0.0146656	0.0146656	0.00223145	0.00223145
C7H11O3+	143.07	2	0.0558476	0.0550159	0.039729	0.0359005		0.452581	0.0240139	0.2451	0.0262084		0.286657	0.0600491	0.310778	0.159375		0.0893707	0.0233788	0.0507984	0.0253		0.199326	0.0371574	0.0176163	0.00392061			0.464475	0.464475	0.0742117	0.0742117
C11H11+	143.086	2	0.0322079	0.0123122	0.0241385	0.0134816		0.0746318	0.0109764	0.035883	0.00274667		0.0564021	0.0143548	0.0591148	0.0261967		0.0235044	0.0111809	0.0204423	0.0185024		0.0567291	0.0122856	0.00493126	0.0007222			0.608264	0.608264	0.0930731	0.0930731
C8H15O2+	143.107	2	0.0307017	0.00572371	0.0227899	0.00871557		0.0334593	0.00236403	0.0171967	0.00130646		0.0355526	0.00523029	0.041176	0.024633		0.0275946	0.0033796	0.017041	0.00927861		0.0509973	0.00636134	0.00452564	0.000827409			0.11652	0.11652	0.018145	0.018145
C9H19O+	143.143	2	0.00989129	0.00233642	0.00693832	0.00107468		0.00497297	0.00400485	0.00270304	0.00183466		0.00111437	0.000787298	0.00116366	0.00062795		0.0132562	0.00137993	0.00907162	0.00611615		0.0171771	0.00181916	0.00154354	0.00036135			0.01612	0.01612	0.00273889	0.00273889
C5H6NO4+	144.029	2	0.00432405	0.00197016	0.00290788	0.000702783		0.00823797	0.0013323	0.00432711	0.000513854		0.00396081	0.00120837	0.00417036	0.00199947		0.00480303	0.00385083	0.00483638	0.00486526		0.0229132	0.00480335	0.00204802	0.000532096			0.00383732	0.00383732	0.000615054	0.000615054
C6H10NO3+	144.066	2	0.00119271	0.00238542	0.000552302	0.0011046		0.0478864	0.00610105	0.0250475	0.0022088		0.00776635	0.00297097	0.00759155	0.00250836		0.00820747	0.00826192	0.00899357	0.00957234		0.0539712	0.0357729	0.00506663	0.00390727			0.00470359	0.00470359	0.000772569	0.000772569
C10H10N+	144.081	2	0.000603144	0.00120629	0.000279324	0.000558648		0.00841538	0.00110749	0.00422082	0.000231915		0.00257617	0.000723319	0.00283019	0.00156305		0.00460615	0.00428584	0.00490594	0.0051266		0.0224682	0.00461081	0.00198937	0.000429381			0.019333	0.019333	0.00302388	0.00302388
C7H14NO2+	144.102	2	0.00448004	0.00304886	0.00314294	0.00190404		0.00819739	0.000688581	0.00424229	0.000382516		0.0065378	0.000848655	0.00758816	0.00443116		0.0102883	0.00434661	0.00867738	0.0074191		0.0414035	0.005633	0.00369609	0.000549069			0.00834432	0.00834432	0.00136489	0.00136489
C8H18NO+	144.138	2	0.00165811	0.000712211	0.00112624	0.000271815		0.00243643	0.000123827	0.00128622	0.000108658		0.000489073	0.000229242	0.000620062	0.000377458		0.0037679	0.00142292	0.00301892	0.00240573		0.0227971	0.00362672	0.00206673	0.000498092			0.00322009	0.00322009	0.000553842	0.000553842
C6H9O4+	145.05	2	0.0242856	0.0447423	0.0122175	0.0205167		0.573879	0.0535127	0.31858	0.0417063		0.140311	0.0252177	0.151925	0.0671332		0.0401529	0.0107223	0.0295594	0.0228445		0.128019	0.0455948	0.0118661	0.00522638			0.146007	0.146007	0.0237113	0.0237113
C10H9O+	145.065	2	0.0349582	0.0699164	0.0163009	0.0326019		0.652107	0.0709521	0.343191	0.0251828		0.170266	0.068815	0.1638	0.0487983		0.0540219	0.0543469	0.0595682	0.0632964		0.201327	0.0667041	0.0187585	0.00806939			0.360511	0.360511	0.0576358	0.0576358
C7H13O3+	145.086	2	0.0160209	0.0131308	0.0117765	0.0100867		0.0406476	0.00344058	0.0209277	0.000396578		0.0400746	0.0126753	0.0425013	0.0216737		0.0170894	0.00269322	0.0105155	0.00574544		0.0472503	0.00683356	0.00425359	0.000567988			0.100751	0.100751	0.0165051	0.0165051
C11H13+	145.101	2	0.0683791	0.01116	0.052207	0.0218514		0.0942634	0.0220023	0.0500233	0.0113456		0.0820671	0.0164899	0.0987313	0.0544664		0.0566741	0.0101082	0.0420769	0.0303225		0.127686	0.032387	0.011549	0.00265236			0.291871	0.291871	0.0485434	0.0485434
C8H17O2+	145.122	2	0.0144438	0.00208654	0.0107254	0.00316573		0.0115283	0.00253157	0.00633049	0.00141733		0.00620425	0.00262762	0.00841814	0.00623325		0.00926028	0.000706981	0.00605654	0.00356837		0.0190944	0.00313292	0.00177429	0.00050171			0.0325459	0.0325459	0.00545008	0.00545008
C5H8NO4+	146.045	2	0.0044136	0.00302271	0.00273672	0.00142764		0.0285272	0.00251286	0.0158137	0.00188592		0.0116236	0.0030329	0.0125375	0.00596006		0.00791096	0.00141191	0.0055341	0.00392236		0.0222674	0.00602679	0.00205442	0.000663351			0.00603838	0.00603838	0.000988243	0.000988243
C9H8NO+	146.06	2	9.31911e-05	0.000186382	4.3755e-05	8.751e-05		0.00301943	0.000304955	0.00152022	6.69833e-05		0.000726319	0.00105173	0.000360238	0.000392119		0.00126457	0.00128344	0.00141523	0.00153422		0.0109931	0.00144148	0.001014	0.000184655			0.00481064	0.00481064	0.000748763	0.000748763
C6H12NO3+	146.081	2	0.00101792	0.00203584	0.000478002	0.000956005		0.0102791	0.00038174	0.00577949	0.000745669		0.00443109	0.00115132	0.00467407	0.00194969		0.00409027	0.0022583	0.00368423	0.00339677		0.0337169	0.00991073	0.00314249	0.00115535			0.00266349	0.00266349	0.000446726	0.000446726
C10H12N+	146.096	2	0.000879307	0.000760555	0.000616155	0.00049006		0.00356829	3.84022e-05	0.00194074	0.000168054		0.00182556	0.000320825	0.00232589	0.00155534		0.00465493	0.00156609	0.00384275	0.00320349		0.023186	0.00475779	0.0021124	0.000392545			0.00486248	0.00486248	0.000824928	0.000824928
C7H16NO2+	146.118	2	0.00107761	0.000461762	0.000772096	0.000300612		0.00135573	0.000209986	0.000724528	0.000118163		0.000406214	9.10844e-05	0.00043998	0.000178615		0.00182229	0.000984119	0.00162451	0.00142394		0.00883714	0.00136442	0.000827947	0.000210082			0.00162866	0.00162866	0.000283291	0.000283291
C5H7O5+	147.029	2	0.011837	0.00556503	0.00862089	0.00313539		0.0186132	0.00393786	0.00942668	0.00126686		0.00403171	0.00138547	0.00432415	0.00220843		0.00350823	0.00335759	0.00385198	0.00403409		0.0148279	0.0033121	0.00138575	0.000395727			0.019537	0.019537	0.00309773	0.00309773
C9H7O2+	147.044	2	0.00477322	0.00954643	0.00225632	0.00451264		0.0722528	0.00513575	0.0417671	0.00673639		0.0431077	0.0105267	0.0517851	0.0350055		0.0191952	0.00630815	0.0155767	0.0130689		0.0485008	0.0118361	0.00455731	0.00133299			0.0547598	0.0547598	0.00913898	0.00913898
C6H11O4+	147.065	2	0.00315599	0.00606307	0.00154495	0.00284209		0.0470997	0.00390239	0.025925	0.0025847		0.021483	0.00281238	0.025468	0.0151233		0.006137	0.00468248	0.00612069	0.00617981		0.0351342	0.00584525	0.00330612	0.000797446			0.0494048	0.0494048	0.0081439	0.0081439
C10H11O+	147.08	2	0.0781927	0.0278934	0.0616806	0.0371149		0.19202	0.00460107	0.106906	0.0118219		0.168004	0.0389158	0.201448	0.126178		0.0685968	0.00954651	0.0511311	0.0370274		0.135688	0.0345348	0.0126005	0.00300925			0.229132	0.229132	0.0384784	0.0384784
C7H15O3+	147.102	2	0.0154023	0.00453678	0.0118995	0.00614584		0.0193307	0.000710323	0.0108987	0.00133128		0.0183685	0.00469127	0.0218082	0.0134244		0.00771689	0.000317838	0.00541421	0.0036576		0.0197182	0.00943596	0.00175759	0.000748365			0.0510472	0.0510472	0.00862118	0.00862118
C11H15+	147.117	2	0.0195005	0.0026681	0.015014	0.00569133		0.0356472	0.00553421	0.0198551	0.00356446		0.0107673	0.00413096	0.0141822	0.00857372		0.0173146	0.00101326	0.0115563	0.00695409		0.0497286	0.00972174	0.00469663	0.00118054			0.0697992	0.0697992	0.0122905	0.0122905
C8H19O2+	147.138	2	0.00234286	0.00047095	0.00174371	0.000520275		0.00139444	0.000923996	0.000836799	0.000452738		0.000611103	0.000315354	0.00078136	0.000465947		0.00216616	0.00020973	0.00148581	0.000943952		0.00755234	0.00122645	0.000729014	0.000236191			0.0115414	0.0115414	0.0020582	0.0020582
C4H6NO5+	148.024	2	0.00563008	0.00292071	0.00406268	0.00153564		0.00491171	0.00100953	0.00256332	0.000346677		0.00163545	0.000838778	0.00152856	0.000383325		0.00298418	0.00300132	0.00335709	0.00356452		0.00687221	0.00131087	0.000637659	8.54643e-05			0.00299063	0.00299063	0.000488104	0.000488104
C8H6NO2+	148.039	2	0.000581686	0.00116337	0.000276839	0.000553678		0.00777946	0.00176081	0.00407128	0.000632903		0.00211834	0.00113394	0.00227533	0.00134386		0.00384508	0.00390189	0.00436142	0.0047268		0.0104414	0.00269067	0.000965225	0.000226561			0.00457666	0.00457666	0.000760153	0.000760153
C5H10NO4+	148.06	2	0.000961677	0.000907037	0.000522195	0.000426513		0.00519799	0.000545991	0.00279555	0.000201518		0.00111209	0.00100719	0.000749604	0.000398979		0.00189	0.00190012	0.00212571	0.00225454		0.0125074	0.0019747	0.00118435	0.000252688			0.00248035	0.00248035	0.000408089	0.000408089
C9H10NO+	148.076	2	0.000994265	0.00152579	0.000594723	0.000729943		0.00830965	0.000981335	0.00439996	0.000279536		0.00633183	0.00162587	0.00829919	0.00639022		0.00947911	0.00661773	0.009448	0.00928321		0.0392658	0.0075727	0.00363389	0.000277678			0.0104256	0.0104256	0.00170772	0.00170772
C6H14NO3+	148.097	2	0.00868309	0.00835432	0.00615882	0.00521704		0.0226515	0.000677504	0.0125511	0.00110623		0.0119718	0.00503706	0.0118008	0.00395491		0.0135925	0.0099134	0.013579	0.0131388		0.0734637	0.0132048	0.00695184	0.00152516			0.00427066	0.00427066	0.0007243	0.0007243
C10H14N+	148.112	2	0.000740718	0.000772533	0.000545965	0.000527068		0.00216061	9.10531e-05	0.00116333	5.50637e-05		0.000717076	0.000186711	0.00095379	0.000742435		0.00276798	0.000618427	0.00216684	0.00164999		0.0138189	0.00125502	0.00130601	0.00016198			0.00318107	0.00318107	0.000562932	0.000562932
C8H5O3+	149.023	2	0.00646906	0.012617	0.00310335	0.00604314		0.0486993	0.00365646	0.0266324	0.0018416		0.0261312	0.00553054	0.0288936	0.011499		0.0214752	0.0137788	0.0208451	0.0202642		0.0262126	0.00413231	0.00253294	0.00060873			0.037017	0.037017	0.0059937	0.0059937
C5H9O5+	149.044	2	0.00512565	0.00199246	0.00356205	0.000532578		0.00971671	0.00208719	0.00526501	0.000835975		0.00462371	0.00284149	0.00726893	0.00732101		0.00228021	0.000933706	0.00198356	0.00179121		0.0176095	0.00535076	0.00167031	0.000528047			0.0319177	0.0319177	0.00514777	0.00514777
C9H9O2+	149.06	2	0.0166416	0.0232708	0.0105671	0.0116249		0.257602	0.0128295	0.146598	0.0172201		0.144872	0.0297621	0.169488	0.0983659		0.0524096	0.00990464	0.0401075	0.0307011		0.0949662	0.0266117	0.00921565	0.0031271			0.121073	0.121073	0.0204377	0.0204377
C6H13O4+	149.081	2	0.00254131	0.00285471	0.00178718	0.00167725		0.0200035	0.00261887	0.0112332	0.00145399		0.00771424	0.00254175	0.010602	0.00867986		0.00301432	0.000692291	0.00233636	0.00188321		0.0112487	0.00664902	0.00103566	0.000603571			0.01947	0.01947	0.0032473	0.0032473
C10H13O+	149.096	2	0.0149229	0.0131464	0.0120324	0.0118319		0.0724641	0.00194695	0.0395828	0.00245861		0.0532706	0.00723937	0.0641257	0.037479		0.0275786	0.000660991	0.019399	0.0128364		0.0490331	0.0104945	0.00467414	0.000926189			0.0464596	0.0464596	0.00784995	0.00784995
C7H17O3+	149.117	2	0.00308346	0.00141942	0.00242971	0.00155339		0.00593042	0.000461091	0.00324051	0.000220924		0.00485837	0.000799622	0.00615714	0.0041746		0.00284812	0.000278918	0.00201436	0.00138387		0.012588	0.0056568	0.0011673	0.000443736			0.010747	0.010747	0.0018895	0.0018895
C11H17+	149.132	2	0.0109979	0.00168407	0.00894366	0.00437457		0.022738	0.00229211	0.0122757	0.00138215		0.00632453	0.00311055	0.0092763	0.00689927		0.0191765	0.00110017	0.0129888	0.0078112		0.0427971	0.00601186	0.00419873	0.00116736			0.0468523	0.0468523	0.0086919	0.0086919
C4H8NO5+	150.04	2	0.0024929	0.00141078	0.00174203	0.000672425		0.00116282	0.000115507	0.000603586	1.90201e-05		0.000546204	0.000582629	0.00032857	0.000242121		0.00025921	0.000185039	9.87897e-05	4.28045e-05		0.000627745	0.000520852	6.83235e-05	5.96634e-05			0.00146947	0.00146947	0.000237954	0.000237954
C5H12NO4+	150.076	2	0.00171774	0.00331389	0.000843724	0.00159267		0.01653	0.000754947	0.00918752	0.000683882		0.00377966	0.00310796	0.00274401	0.00131681		0.0136249	0.0136401	0.0154241	0.0161025		0.031543	0.0139393	0.00318181	0.00172924			0.005281	0.005281	0.000878904	0.000878904
C9H12NO+	150.091	2	0.000763087	0.00148226	0.000381472	0.000709738		0.00726359	0.00101007	0.0038607	0.000286627		0.00514431	0.00111023	0.00664921	0.00477454		0.00780369	0.00787167	0.00893017	0.00955424		0.04365	0.0102864	0.0041678	0.000658445			0.0179679	0.0179679	0.00294523	0.00294523
C10H16N+	150.128	2	0.000113395	0.000226791	5.47342e-05	0.000109468		0.00317698	0.000397037	0.00168929	0.000101683		0.000902235	6.60315e-05	0.00112539	0.000665779		0.00472692	0.000847621	0.00367315	0.00279906		0.0244233	0.00423286	0.00234303	0.000260067			0.00239269	0.00239269	0.000424994	0.000424994
C4H7O6+	151.024	2	0.000813858	0.000428739	0.000544227	0.000166331		0.00143428	0.000464349	0.00077076	0.000188059		0.00139213	0.000773192	0.00218266	0.00202793		0.00134008	0.000235233	0.00103941	0.000796681		0.00495524	0.00343912	0.00046979	0.000320999			0.00318887	0.00318887	0.000510048	0.000510048
C8H7O3+	151.039	2	0.00295176	0.00590351	0.00143348	0.00286695		0.0636599	0.00563359	0.0359117	0.00355471		0.0241178	0.00771791	0.0259266	0.0107113		0.00925976	0.00933738	0.0106604	0.0113964		0.0221503	0.0125902	0.00231253	0.00145809			0.0198314	0.0198314	0.00337157	0.00337157
C5H11O5+	151.06	2	0.00489032	0.00651702	0.00272529	0.00301936		0.0133277	0.00303097	0.00747822	0.00135727		0.0120351	0.00992902	0.020757	0.0234997		0.00494152	0.00308882	0.00451336	0.0044531		0.0395784	0.028589	0.00372339	0.00235072			0.0356519	0.0356519	0.0059316	0.0059316
C9H11O2+	151.075	2	0.0194238	0.0388475	0.00943514	0.0188703		0.194327	0.00912005	0.109693	0.00959307		0.15505	0.0231292	0.180511	0.0917328		0.120064	0.0384989	0.0701279	0.0331571		0.186011	0.0413058	0.018184	0.00350598			0.0953135	0.0953135	0.0162878	0.0162878
C6H15O4+	151.096	2	0.0144606	0.0247752	0.00834161	0.0120213		0.0772271	0.00658351	0.0441989	0.00510363		0.0525223	0.00827325	0.0674226	0.0448528		0.0284355	0.00433553	0.0204129	0.0145184		0.0238491	0.019642	0.00221057	0.00177307			0.0605076	0.0605076	0.0103189	0.0103189
C10H15O+	151.112	2	0.0297422	0.0105986	0.024428	0.0151541		0.0962237	0.00606141	0.0525084	0.0039334		0.0586862	0.009075	0.07489	0.0499053		0.0317196	0.00425596	0.0205854	0.0113124		0.0448973	0.00948016	0.00442093	0.000926665			0.0477746	0.0477746	0.00820371	0.00820371
C11H19+	151.148	2	0.00524724	0.00185536	0.00448229	0.00305441		0.0106315	0.00253574	0.00559786	0.000909243		0.000678904	0.000448552	0.000994965	0.000740396		0.0127518	0.0019477	0.00811566	0.00420581		0.0348006	0.00332173	0.00351638	0.000973572			0.00858945	0.00858945	0.00160238	0.00160238
C7H6NO3+	152.034	2	0.000237629	0.000475257	0.000116166	0.000232332		0.000512452	0.000167116	0.000330636	0.000106613		0.000796625	0.000309349	0.00115938	0.000961444		0.00153559	0.0008903	0.00149025	0.00142316		0.00610994	0.00298221	0.000608373	0.000340791			0.00130872	0.00130872	0.000223281	0.000223281
C4H10NO5+	152.055	2	0.000541473	0.000839411	0.00026811	0.000410458		0.00711526	0.000828998	0.00412668	0.000560026		0.000601711	0.000566454	0.000527123	0.000493783		0.00131173	0.000711423	0.000625261	0.000132205		0.00591506	0.00393365	0.000603461	0.000461381			0.002847	0.002847	0.000482791	0.000482791
C8H10NO2+	152.071	2	0.00214258	0.00428515	0.00104766	0.00209533		0.0102283	0.00175321	0.00606933	0.00111675		0.0129467	0.00611537	0.0197749	0.0177755		0.0143462	0.00302825	0.00963377	0.00606968		0.0448299	0.0125136	0.00433411	0.000873522			0.0127179	0.0127179	0.002161	0.002161
C9H14NO+	152.107	2	0.00165516	0.00202463	0.00117701	0.00121527		0.00899695	0.000807624	0.00483398	7.67729e-05		0.00478013	0.000937559	0.00579692	0.00351277		0.00612427	0.00377629	0.00601598	0.0056872		0.0263378	0.00372395	0.00261287	0.000350352			0.00436876	0.00436876	0.00075036	0.00075036
C8H9O3+	153.055	2	0.0092773	0.0185546	0.00456591	0.00913181		0.858884	0.0858117	0.491033	0.0510969		0.16767	0.049309	0.189529	0.0913077		0.0468393	0.0091759	0.031262	0.0195247		0.119109	0.0767132	0.012499	0.00948097			0.18728	0.18728	0.0323828	0.0323828
C12H9+	153.07	2	0.00102616	0.00205232	0.000505085	0.00101017		0.325079	0.0431619	0.170333	0.00927794		0.0254926	0.0258665	0.0188616	0.0152673		0.0203143	0.0203143	0.0233168	0.0240564		0.0846262	0.0460894	0.00896752	0.00545513			0.226641	0.226641	0.0363831	0.0363831
C5H13O5+	153.076	2	0.021328	0.0315965	0.0143374	0.017763		0.142836	0.0333347	0.0833561	0.0168737		0.0974272	0.057962	0.156115	0.156889		0.0135221	0.00431019	0.0089826	0.0065678		0.0507656	0.0467661	0.00495899	0.00460813			0.201778	0.201778	0.0347515	0.0347515
C9H13O2+	153.091	2	0.0937632	0.1182	0.0682285	0.0755916		0.924128	0.123033	0.503517	0.0365721		0.698854	0.176491	0.819993	0.463337		0.164846	0.0243318	0.108831	0.0636751		0.238637	0.0680412	0.024439	0.00869911			0.621008	0.621008	0.107421	0.107421
C10H17O+	153.127	2	0.0350402	0.0061231	0.0292981	0.0148716		0.096775	0.0139132	0.05335	0.00784072		0.0198229	0.00579594	0.0264746	0.0152876		0.022229	0.000807766	0.0157814	0.0100693		0.0314605	0.00431198	0.00322699	0.000745383			0.0238554	0.0238554	0.00413239	0.00413239
C8H12NO2+	154.086	2	0.00295078	0.00541812	0.00161451	0.00264667		0.0368687	0.00528391	0.0203306	0.00176704		0.0235461	0.00538221	0.0300609	0.0206424		0.0207245	0.00632645	0.0177527	0.014665		0.0835085	0.0198834	0.00858789	0.0025534			0.0242415	0.0242415	0.00417689	0.00417689
C9H16NO+	154.123	2	0.00160741	0.00105163	0.0012919	0.000973432		0.00517169	0.000320408	0.00284396	0.000135275		0.00191008	0.000445771	0.00230612	0.00121494		0.00486018	0.00135308	0.00408235	0.00325155		0.0213267	0.00228315	0.00218998	0.000341493			0.00253933	0.00253933	0.000444125	0.000444125
C10H20N+	154.159	2	0.0102947	0.0107134	0.0102692	0.0114296		0.0118521	0.00336946	0.00694404	0.00188902		0.00016097	0.000174171	0.000169856	0.000183595		0.0018928	0.000782731	0.00161897	0.00129803		0.0113407	0.00133083	0.00119458	0.000342071			0.00059777	0.00059777	0.000107746	0.000107746
C7H7O4+	155.034	2	0.00545324	0.00617605	0.00330102	0.00291702		0.0534	0.00579752	0.0301357	0.00231584		0.0417443	0.0167218	0.0437769	0.0153854		0.0137499	0.0019269	0.0108262	0.00814646		0.0227114	0.0047428	0.00238409	0.000677989			0.0295643	0.0295643	0.00511151	0.00511151
C4H11O6+	155.055	2	0.0022786	0.0045572	0.00113619	0.00227237		0.0256067	0.00642958	0.0151735	0.00327507		0.0651284	0.0595428	0.117687	0.147688		0.00659628	0.00209932	0.00429353	0.00269639		0.0308559	0.0201003	0.00310863	0.0019947			0.0550288	0.0550288	0.00964798	0.00964798
C8H11O3+	155.07	2	0.0062641	0.0125282	0.0031238	0.0062476		0.250474	0.0224163	0.14443	0.0135021		0.379452	0.111686	0.481202	0.351939		0.0555681	0.0162976	0.0330694	0.014522		0.0764809	0.0244537	0.00797276	0.00299008			0.156831	0.156831	0.0275833	0.0275833
C12H11+	155.086	2.63	0.00385955	0.00554232	0.00257413	0.00297344		0.0403007	0.00771326	0.0218464	0.00258501		0.0219918	0.0155917	0.0181067	0.00668675		0.00965173	0.00970324	0.011416	0.01226		0.0167544	0.00302954	0.0017424	0.000357502			0.0546477	0.0546477	0.00920305	0.00920305
C9H15O2+	155.107	2	0.0117076	0.0112379	0.00919424	0.00843141		0.0732519	0.00335018	0.0417519	0.00260166		0.0467592	0.00900161	0.0606937	0.0417307		0.023018	0.00408188	0.0148566	0.00779711		0.0335417	0.00540128	0.0034925	0.000680648			0.0528274	0.0528274	0.00922563	0.00922563
C10H19O+	155.143	2	0.0173881	0.0126735	0.0168515	0.0150662		0.0307585	0.00181673	0.0171363	0.00102361		0.00224587	0.00128643	0.00283613	0.00177924		0.00804841	0.000484504	0.00591348	0.00384945		0.0147433	0.00119505	0.00155207	0.000323219			0.00935936	0.00935936	0.00167563	0.00167563
C11H23+	155.179	2	0.000148627	0.000245438	9.13456e-05	0.000124665		0.0022779	0.000334677	0.00126251	0.000111685		0	0	0	0		0.00188192	0.000252533	0.00144903	0.00101758		0.00912691	0.000979902	0.000970166	0.000256479			0.00710307	0.00710307	0.001331	0.001331
C6H6NO4+	156.029	2	0.00134942	0.00103502	0.000837252	0.000478631		0.0042642	0.00076641	0.00238547	0.000287413		0.00289712	0.000947891	0.00332379	0.00171624		0.00213898	0.000948013	0.00199447	0.00175997		0.00538281	0.00133128	0.000570729	0.000183761			0.00168545	0.00168545	0.000294837	0.000294837
C10H6NO+	156.044	2	0.000159591	0.000319183	8.00887e-05	0.000160177		0.00264156	0.000216364	0.00150572	9.80391e-05		0.00032537	0.000496632	0.000157192	0.000208514		0.000824404	0.000830546	0.000979852	0.0010451		0.00421388	0.00148602	0.000442411	0.000173376			0.00107294	0.00107294	0.000188072	0.000188072
C7H10NO3+	156.066	2	0.000944022	0.00188804	0.000473809	0.000947617		0.0123684	0.00176043	0.0070691	0.000760021		0.0102363	0.0030545	0.0135355	0.0105066		0.00552081	0.00287342	0.00534009	0.00492341		0.0212246	0.00636904	0.00224473	0.000842325			0.00682319	0.00682319	0.00119482	0.00119482
C8H14NO2+	156.102	2	0.00394125	0.00491811	0.00275962	0.00272987		0.0155494	0.00269972	0.00846865	0.000847498		0.00794033	0.00192619	0.00968827	0.00576802		0.008158	0.00434648	0.00791845	0.0072805		0.0358222	0.00804871	0.00378616	0.001077			0.00966949	0.00966949	0.00169552	0.00169552
C9H18NO+	156.138	2	0.0015947	0.000829491	0.00129758	0.000682874		0.0037787	0.000323622	0.00214039	0.000216173		0.00047137	0.000220788	0.000490006	0.000249761		0.00414021	0.00185534	0.00379949	0.00322678		0.0225286	0.00162058	0.00240704	0.00051797			0.00218616	0.00218616	0.000402211	0.000402211
C10H22N+	156.175	2	0.000119276	9.77402e-05	0.000103241	9.22227e-05		0.000457216	0.000149345	0.000241899	5.90621e-05		0	0	0	0		0.000337564	0.000180097	0.000320876	0.000278566		0.00325381	0.000559054	0.000354948	0.000119019			0.000485937	0.000485937	9.01894e-05	9.01894e-05
C6H5O5+	157.013	2	0.00501945	0.00231056	0.00398511	0.00157101		0.00559375	0.00112159	0.0030523	0.000382645		0.00304964	0.00139463	0.00318633	0.00112077		0.00378062	0.00380677	0.00451903	0.00481342		0.00312425	0.000601864	0.000335366	7.88691e-05			0.00473396	0.00473396	0.000800271	0.000800271
C10H5O2+	157.028	2	0.000282809	0.00025174	0.000303855	0.00028762		0	0	0	0		0	0	0	0		0	0	0	0		0.00150408	0.00130185	0.00015782	0.000128996			0.000217939	0.000217939	3.50964e-05	3.50964e-05
C7H9O4+	157.05	2	0.00140173	0.00280346	0.000707998	0.001416		0.050681	0.00696223	0.0288062	0.00265371		0.020096	0.0078599	0.0216975	0.00823201		0.00584697	0.000766954	0.00407479	0.00257424		0.0105555	0.00452649	0.00115883	0.000603326			0.0452915	0.0452915	0.00778074	0.00778074
C11H9O+	157.065	2	0.00236977	0.00473954	0.00119706	0.00239412		0.0522015	0.00232903	0.0307346	0.00280924		0.00956781	0.00607043	0.00882727	0.00299458		0.006066	0.00612115	0.00726894	0.00778388		0.0225055	0.00531365	0.00241918	0.00074439			0.0554506	0.0554506	0.00958154	0.00958154
C8H13O3+	157.086	2	0.0158123	0.018504	0.0116131	0.0112907		0.171308	0.018758	0.0979092	0.00752032		0.105379	0.030092	0.120915	0.0566337		0.0313111	0.00672514	0.0201327	0.0106041		0.0594942	0.0105363	0.00631936	0.00125636			0.154591	0.154591	0.0271549	0.0271549
C12H13+	157.101	2	0.00598219	0.0052673	0.00505093	0.00489325		0.0309276	0.00815394	0.0162445	0.00301489		0.0266375	0.00842909	0.0304495	0.0145647		0.0123954	0.00654692	0.0121468	0.0112412		0.0321675	0.00930193	0.00338178	0.000781501			0.150515	0.150515	0.0256789	0.0256789
C9H17O2+	157.122	2	0.00825271	0.00327112	0.0066336	0.00348062		0.0208452	0.00092756	0.011853	0.000655519		0.0105333	0.00172896	0.0132478	0.0076836		0.00867911	0.000720204	0.00602549	0.00349587		0.0183067	0.00288477	0.00195827	0.000377401			0.0360259	0.0360259	0.00623613	0.00623613
C10H21O+	157.159	2	0.00471134	0.000759258	0.00371852	0.000792948		0.0102042	0.00151932	0.00555562	0.000767202		0.000897333	0.000708794	0.000994572	0.000661833		0.00612939	0.000605602	0.00477212	0.00337386		0.0082748	0.00101251	0.000897187	0.000214689			0.0102521	0.0102521	0.0019012	0.0019012
C6H8NO4+	158.045	2	0.00103882	0.000631115	0.000698114	0.000242144		0.00346582	0.000346018	0.00203147	0.000192806		0.00193436	0.000638494	0.00218537	0.000986412		0.00129691	0.000882022	0.00135757	0.00132795		0.00466771	0.0013138	0.000507651	0.000179696			0.00125833	0.00125833	0.000222641	0.000222641
C7H12NO3+	158.081	2	0.00080874	0.00161748	0.000411187	0.000822373		0.0125545	0.00118525	0.00721086	0.000465932		0.00484548	0.00221228	0.00490929	0.0011693		0.00887484	0.00309969	0.00798827	0.00689027		0.0287807	0.0071497	0.00312652	0.000890996			0.00301486	0.00301486	0.000538476	0.000538476
C11H12N+	158.096	2	0.000246166	0.000492332	0.00012517	0.00025034		0.00154868	0.000265236	0.000832926	7.76745e-05		0.00128054	0.000314968	0.00173326	0.00122692		0.00268435	0.00208251	0.00294806	0.00294121		0.0104166	0.00204968	0.00109969	0.000133713			0.00596971	0.00596971	0.00102883	0.00102883
C8H16NO2+	158.118	2	0.00149602	0.00141047	0.00114079	0.000961922		0.00474921	0.000285196	0.00270088	8.14794e-05		0.00280899	0.000508801	0.00350916	0.00201625		0.00396033	0.00179975	0.00371539	0.00320382		0.0180125	0.00286692	0.00194477	0.000362437			0.00280071	0.00280071	0.000508009	0.000508009
C9H20NO+	158.154	2	0.000322184	0.000461199	0.000210827	0.000235642		0.000886839	0.000138508	0.000507438	8.10039e-05		0.000108505	6.40106e-05	0.000139508	8.22513e-05		0.000822194	0.000332303	0.000750237	0.000629927		0.00589739	0.000868496	0.000643315	0.000145578			0.00100262	0.00100262	0.000182674	0.000182674
C6H7O5+	159.029	2	0.0123408	0.0060702	0.00974467	0.00375963		0.0170444	0.0030875	0.00944679	0.00101215		0.00485531	0.00193628	0.00534928	0.00219659		0.00454191	0.00457553	0.00550196	0.00586764		0.00698513	0.000948441	0.000768042	0.000154449			0.0125519	0.0125519	0.00214418	0.00214418
C10H7O2+	159.044	2	0.00157867	0.00257786	0.000898633	0.00129587		0.00745874	0.00130842	0.00383331	0.000563039		0.00272758	0.0017504	0.00231179	0.00118869		0.00362134	0.00366756	0.00440832	0.00475852		0.00972282	0.00338528	0.00109587	0.000450936			0.012946	0.012946	0.00225945	0.00225945
C7H11O4+	159.065	2	0.0022469	0.0044938	0.00114954	0.00229909		0.112182	0.0107235	0.0662339	0.006212		0.0335342	0.0127434	0.0376621	0.0168658		0.0079532	0.000973375	0.00626688	0.00463057		0.0161949	0.00577835	0.00181735	0.000839167			0.0374585	0.0374585	0.0066299	0.0066299
C11H11O+	159.08	2	0.013648	0.027296	0.00698316	0.0139663		0.227832	0.0299568	0.129884	0.010053		0.119048	0.0333533	0.134617	0.0519358		0.038278	0.0197944	0.0377067	0.0341909		0.0916433	0.0252973	0.0101315	0.00346436			0.201596	0.201596	0.0352312	0.0352312
C8H15O3+	159.102	2	0.00166808	0.00316868	0.000907509	0.0016024		0.0135048	0.00163025	0.00764891	0.000463706		0.00949304	0.0019028	0.0120722	0.00748796		0.00356371	0.000266829	0.00253338	0.00153345		0.00899022	0.00251788	0.000965363	0.00026153			0.0209751	0.0209751	0.00375986	0.00375986
C12H15+	159.117	2	0.0162179	0.00508976	0.0136645	0.00763726		0.0292244	0.00377391	0.0157641	0.0015642		0.0289452	0.00556244	0.0363852	0.0189718		0.0209807	0.00501737	0.0178104	0.0137092		0.0473973	0.0116931	0.0051655	0.00118294			0.0742619	0.0742619	0.0133808	0.0133808
C9H19O2+	159.138	2	0.00690358	0.0018356	0.00559859	0.00230634		0.00778975	0.00113123	0.00456549	0.000723011		0.00349431	0.00110467	0.00458356	0.00249222		0.00499954	0.000319063	0.00378345	0.00249602		0.0100977	0.00184281	0.00112531	0.000309684			0.013874	0.013874	0.0025192	0.0025192
C5H6NO5+	160.024	2	0.0025558	0.00138659	0.00198967	0.000774355		0.00218321	0.000483497	0.00120005	0.000172366		0.000702443	0.000407852	0.000694843	0.000175785		0.00172368	0.00145624	0.00197853	0.00204092		0.00485034	0.000655235	0.000533933	7.98272e-05			0.00146542	0.00146542	0.000254604	0.000254604
C9H6NO2+	160.039	2	0.000316444	0.000534933	0.000170635	0.000272713		0.00538202	0.000890021	0.0031219	0.000362218		0.00185307	0.000432994	0.00231887	0.00135975		0.00276747	0.00281615	0.00340199	0.00370649		0.00691806	0.00284421	0.000769253	0.000374092			0.00131425	0.00131425	0.000239791	0.000239791
C6H10NO4+	160.06	2	0.00088101	0.00140594	0.000467477	0.000718093		0.00922901	0.0011805	0.00538209	0.000492816		0.00325404	0.0013727	0.00353278	0.00131548		0.00259645	0.00260596	0.00315144	0.00332503		0.013208	0.00379479	0.00148907	0.000565282			0.0028897	0.0028897	0.000518063	0.000518063
C7H14NO3+	160.097	2	0.00111375	0.00222751	0.00057353	0.00114706		0.0155484	0.000619913	0.00936069	0.000890871		0.00499712	0.00192865	0.00531339	0.00150806		0.00356734	0.00148146	0.0032818	0.00282194		0.0318342	0.0100541	0.00358237	0.00142002			0.00312785	0.00312785	0.000578978	0.000578978
C11H14N+	160.112	2	0.000237626	0.000308706	0.000171355	0.000180646		0.00186269	0.000148824	0.00108789	6.70981e-05		0.00113878	0.000200343	0.00155474	0.00103825		0.00215025	0.00101838	0.0020818	0.0018427		0.01025	0.00245814	0.00111437	0.000223172			0.00212983	0.00212983	0.000399908	0.000399908
C8H18NO2+	160.133	2	0.00033106	0.000237851	0.000245699	0.000156211		0.000702783	8.93217e-05	0.00040725	5.48822e-05		0.000144145	4.92681e-05	0.000158308	4.77662e-05		0.000671396	0.000411177	0.00067676	0.000608103		0.00429568	0.000771569	0.000480293	0.000113273			0.000662599	0.000662599	0.000125085	0.000125085
C6H9O5+	161.044	2	0.00849909	0.0059605	0.00560776	0.00269948		0.0320353	0.00450949	0.0184589	0.00155373		0.00900723	0.00219422	0.0110269	0.00581659		0.00451129	0.00419365	0.00538091	0.00561631		0.0162884	0.004729	0.00186497	0.00073553			0.0291063	0.0291063	0.00512627	0.00512627
C10H9O2+	161.06	2	0.00354748	0.00709495	0.00183784	0.00367568		0.221358	0.0251123	0.132679	0.0140799		0.0689465	0.0173774	0.0826522	0.0400366		0.0246745	0.0106189	0.023547	0.0207493		0.0624656	0.0265761	0.00718453	0.00375335			0.0823645	0.0823645	0.0151138	0.0151138
C7H13O4+	161.081	2	0.00358008	0.00544737	0.00245653	0.00307275		0.0558804	0.00568747	0.0338103	0.00376149		0.0276504	0.00707689	0.0393284	0.0300822		0.00605952	0.00141579	0.0043091	0.00281118		0.0302281	0.0121202	0.00334437	0.00144207			0.060514	0.060514	0.0109665	0.0109665
C11H13O+	161.096	2	0.0336719	0.0293663	0.0300627	0.0307377		0.195705	0.0105367	0.116369	0.00816412		0.173091	0.0417182	0.218873	0.129377		0.064363	0.0087244	0.0520858	0.0374793		0.116914	0.0311494	0.0130639	0.00355658			0.186697	0.186697	0.0342827	0.0342827
C8H17O3+	161.117	2	0.00582569	0.0045542	0.00501739	0.00469843		0.020709	0.00132883	0.012392	0.00101635		0.0139223	0.00525111	0.0158876	0.00722002		0.00504171	0.00233189	0.0049122	0.00447696		0.0100507	0.00556607	0.00106427	0.0005601			0.0285357	0.0285357	0.00527296	0.00527296
C12H17+	161.132	2	0.00588599	0.00143176	0.00492393	0.00222999		0.0117855	0.00247156	0.00676403	0.00137324		0.00307052	0.00143605	0.00452591	0.002849		0.00783624	0.000653768	0.00616321	0.00419874		0.0209876	0.00451483	0.00237061	0.000583491			0.0286017	0.0286017	0.0055105	0.0055105
C9H21O2+	161.154	2	0.000862828	0.000332633	0.000653538	0.000144971		0.00094345	0.000417414	0.000555668	0.00022226		0.000154193	0.00013244	0.000164811	0.000114835		0.00096254	0.000223088	0.000806172	0.000608676		0.00271256	0.000439068	0.000310318	8.34316e-05			0.00372347	0.00372347	0.000718826	0.000718826
C5H8NO5+	162.04	2	0.00467266	0.00256027	0.00344223	0.00108448		0.00560529	0.000916651	0.00324204	0.000333606		0.0022091	0.000912461	0.00246323	0.000997059		0.00445007	0.00446659	0.00546889	0.00577112		0.00672178	0.000908002	0.000763609	0.00014015			0.0024061	0.0024061	0.000429533	0.000429533
C9H8NO2+	162.055	2	0.000255862	0.000511725	0.000133379	0.000266757		0.00382275	0.000847843	0.00214509	0.000311345		0.00101159	0.000603426	0.00104884	0.000507973		0.00256946	0.00256497	0.00315987	0.00335426		0.0133284	0.00265089	0.00147669	0.000100825			0.00336914	0.00336914	0.000611266	0.000611266
C6H12NO4+	162.076	2	0.00341531	0.00683063	0.0017806	0.00356121		0.0703669	0.00603028	0.0435846	0.00548658		0.0140934	0.00501726	0.0155453	0.00514274		0.0090667	0.00885426	0.0109705	0.0113802		0.0816674	0.0426841	0.00960067	0.00600607			0.00536542	0.00536542	0.00099715	0.00099715
C10H12NO+	162.091	2	0.00110581	0.00221162	0.000576579	0.00115316		0.0173364	0.00163494	0.0104428	0.000987129		0.00655255	0.00153002	0.00897016	0.00638928		0.00781869	0.00791465	0.00969757	0.0104574		0.0387525	0.00985483	0.00442745	0.00142223			0.00745078	0.00745078	0.00136788	0.00136788
C7H16NO3+	162.112	2	0.000707892	0.00141578	0.000369149	0.000738298		0.00550326	0.00029475	0.00321193	0.000105838		0.00079062	0.000749544	0.000603513	0.000363474		0.00235993	0.002361	0.00285904	0.00293065		0.0141914	0.00443457	0.00163727	0.000653345			0.000816306	0.000816306	0.000149728	0.000149728
C11H16N+	162.128	2	8.24552e-05	0.00016491	4.30025e-05	8.60051e-05		0.000783331	5.99077e-05	0.000450951	5.03289e-06		0.000375319	9.09918e-05	0.000546805	0.000388356		0.00132081	0.000349778	0.00116855	0.00094139		0.00688491	0.000939382	0.00077367	7.35611e-05			0.00146992	0.00146992	0.000283939	0.000283939
C5H7O6+	163.024	2	0.00182635	0.00213382	0.00100928	0.00112147		0.00323673	0.0010572	0.0018207	0.000443272		0.0017304	0.000980838	0.00292243	0.00287058		0.00190577	0.00135821	0.00210507	0.00209136		0.00317711	0.000931695	0.000351193	6.29816e-05			0.00448143	0.00448143	0.000780842	0.000780842
C9H7O3+	163.039	2	0.00585862	0.0117172	0.0030727	0.00614541		0.0368542	0.00275905	0.022131	0.00162877		0.0152283	0.0045357	0.0174527	0.00628228		0.0110539	0.0111717	0.0137724	0.0148002		0.0175195	0.00247046	0.00202782	0.000422882			0.0195025	0.0195025	0.00354094	0.00354094
C6H11O5+	163.06	2	0.00957702	0.019154	0.00502356	0.0100471		0.178622	0.0212128	0.108346	0.0117541		0.0366449	0.0068739	0.0480713	0.0288633		0.0257856	0.0258608	0.0318505	0.0335173		0.0738802	0.0200349	0.00858406	0.00307686			0.110705	0.110705	0.020045	0.020045
C10H11O2+	163.075	2	0.00755765	0.0151153	0.00396469	0.00792938		0.307786	0.02746	0.187007	0.0178606		0.125621	0.0330903	0.154601	0.0826378		0.0321683	0.0258417	0.0368328	0.0371507		0.0782202	0.0316451	0.00925758	0.00454172			0.105158	0.105158	0.0194962	0.0194962
C7H15O4+	163.096	2	0.000887657	0.00177531	0.00046572	0.000931439		0.0202317	0.00197661	0.0124354	0.00140982		0.00672013	0.00180991	0.00850911	0.00507016		0.00161336	0.00128587	0.00185449	0.00197095		0.00467611	0.00346971	0.000517923	0.000397293			0.0100923	0.0100923	0.00186032	0.00186032
C11H15O+	163.112	2	0.0140247	0.01315	0.0123836	0.0129132		0.156278	0.0103144	0.0947445	0.00791625		0.0910153	0.0163991	0.121822	0.0775717		0.0479691	0.00501603	0.034258	0.0196856		0.0943512	0.0234915	0.0108478	0.00291275			0.0873681	0.0873681	0.0163095	0.0163095
C8H19O3+	163.133	2	0.00112883	0.00103381	0.000868536	0.000679916		0.00509938	0.000149171	0.00318256	0.000386172		0.0022595	0.000469774	0.00289155	0.0016459		0.00122618	0.000335315	0.00108678	0.00088034		0.00756699	0.001636	0.000853878	0.000151871			0.00628051	0.00628051	0.00117789	0.00117789
C12H19+	163.148	2	0.00262453	0.000637324	0.00222011	0.000994658		0.0071327	0.000583748	0.00418843	0.000374647		0.00154827	0.000749041	0.00242882	0.00174502		0.00689221	0.000442919	0.00530523	0.0033961		0.0176605	0.00315538	0.00206343	0.000545028			0.0177719	0.0177719	0.00359236	0.00359236
C4H6NO6+	164.019	2	0.000543451	0.000214139	0.000424904	9.07973e-05		0.000909978	0.000213976	0.000507142	7.93622e-05		0.000144246	0.000127618	0.000106194	7.29703e-05		0.000369471	0.000383049	0.000470476	0.000528188		0.000959172	0.000529061	0.000106695	4.77795e-05			0.000295893	0.000295893	5.14204e-05	5.14204e-05
C8H6NO3+	164.034	2	0.000798423	0.00100743	0.000432192	0.00054077		0.0014595	0.00028989	0.000876849	0.000131589		0.00098421	0.000330888	0.00151119	0.00125863		0.0021083	0.00148925	0.00234075	0.00231328		0.00400269	0.00148424	0.000447004	0.000151221			0.00141839	0.00141839	0.000252616	0.000252616
C5H10NO5+	164.055	2	0.00314422	0.00193847	0.00221949	0.000809438		0.00587125	0.000900817	0.00337243	0.000273123		0.000915642	0.00103382	0.000598802	0.000443325		0.00176687	0.0017724	0.00219661	0.00231333		0.00730053	0.00161966	0.000856592	0.000258879			0.00261667	0.00261667	0.000471872	0.000471872
C9H10NO2+	164.071	2	0.000481069	0.000962138	0.000253915	0.00050783		0.00697732	0.00190557	0.00414565	0.000850267		0.00416641	0.00189656	0.00678069	0.0060782		0.00306412	0.00135335	0.00298096	0.00277416		0.0147135	0.00498066	0.00167963	0.00058402			0.00395814	0.00395814	0.000731233	0.000731233
C6H14NO4+	164.092	2	0.00103501	0.00207003	0.000546365	0.00109273		0.0181141	0.00109941	0.0110573	0.000920329		0.00195913	0.00190896	0.00143605	0.000819995		0.00668085	0.00670465	0.00831316	0.00876811		0.0206785	0.00710484	0.00253506	0.00120465			0.00298161	0.00298161	0.000557363	0.000557363
C10H14NO+	164.107	2	0.000460037	0.000920073	0.000242868	0.000485736		0.00656193	0.000583337	0.00394876	0.000291849		0.00383248	0.000815566	0.00514894	0.00343217		0.0047376	0.00475891	0.00590344	0.00624536		0.0224421	0.0043457	0.00260619	0.000505483			0.00422364	0.00422364	0.000779312	0.000779312
C11H18N+	164.143	2	0	0	0	0		0.00332426	0.000404816	0.00192189	9.837e-05		0.000240535	2.56305e-05	0.000306724	0.000140995		0.00215114	0.000470898	0.00183861	0.00143321		0.0116364	0.00258398	0.0013277	0.000175862			0.000991715	0.000991715	0.000193311	0.000193311
C5H9O6+	165.039	2	0.000579318	0.00094358	0.000310739	0.000500651		0.00316619	0.00135674	0.00179836	0.000606329		0.00226007	0.00161295	0.00409207	0.00438355		0.00101341	0.000433858	0.000991172	0.000920338		0.00629423	0.00342879	0.000734216	0.000422903			0.00797073	0.00797073	0.00140398	0.00140398
C9H9O3+	165.055	2	0.00378207	0.00756414	0.00200828	0.00401655		0.129761	0.0188707	0.0771538	0.00726447		0.048839	0.0261122	0.0513032	0.0149485		0.0165035	0.0132818	0.0191648	0.0191459		0.025101	0.00927017	0.0030748	0.00141988			0.0273852	0.0273852	0.00513436	0.00513436
C6H13O5+	165.076	2	0.00504011	0.0100802	0.00267664	0.00535328		0.0345873	0.0102015	0.0224941	0.00589946		0.0270487	0.0224294	0.0509839	0.0577471		0.00446523	0.00186336	0.00430029	0.00389756		0.0410704	0.0316953	0.00466498	0.0035346			0.0516095	0.0516095	0.00959015	0.00959015
C10H13O2+	165.091	2	0.0192927	0.0375419	0.0105925	0.0197923		0.472441	0.0541069	0.317419	0.0648248		0.245774	0.0413696	0.32837	0.200201		0.0649324	0.0113247	0.0555783	0.0421789		0.127781	0.0323556	0.0152681	0.00482309			0.222848	0.222848	0.0418823	0.0418823
C7H17O4+	165.112	2	0.00149492	0.00269502	0.000894385	0.00141257		0.0289064	0.00356691	0.0194971	0.00410857		0.0085625	0.00320189	0.00975501	0.00382299		0.00206504	0.00122455	0.00217863	0.00205571		0.0021618	0.0014025	0.000240633	0.000158251			0.0113137	0.0113137	0.00212039	0.00212039
C11H17O+	165.127	2	0.0171114	0.00927205	0.015444	0.0122725		0.0334884	0.00531687	0.0182248	0.00241774		0.0344437	0.0108292	0.0519456	0.0430459		0.0298596	0.00822346	0.0191786	0.00817566		0.0534845	0.0112997	0.00631159	0.00139989			0.0456405	0.0456405	0.00863821	0.00863821
C12H21+	165.164	2	0.000762438	0.000760405	0.000639281	0.000633585		0.0049676	0.000544253	0.00293444	0.000161571		0.000120966	0.000117785	0.000183319	0.000193314		0.00440459	0.000257804	0.00331111	0.00200236		0.0133243	0.00138672	0.00159904	0.000387708			0.0060087	0.0060087	0.00122479	0.00122479
C4H8NO6+	166.035	2	0.000128937	0.000198575	6.97748e-05	0.000106102		0.000711963	0.000129066	0.00041736	4.70614e-05		0.000277748	8.33508e-05	0.000329493	0.000136057		0.000463704	0.000466655	0.000585969	0.000623229		0.00284311	0.000903825	0.000337038	0.000125503			0.000753595	0.000753595	0.000139378	0.000139378
C5H12NO5+	166.071	2	0.000401788	0.000441405	0.000230603	0.000235424		0.00455454	0.0010254	0.00253444	0.000375392		0.000449865	0.000751428	0.00024331	0.000315164		0.000248359	0.000264385	0.000323834	0.000376319		0.00351182	0.00234376	0.000414099	0.000279637			0.00217778	0.00217778	0.00040023	0.00040023
C9H12NO2+	166.086	2	0.00148081	0.00296161	0.000791252	0.0015825		0.0212346	0.00290889	0.0138953	0.00245942		0.0160858	0.0057238	0.0253571	0.0214672		0.0101845	0.00505962	0.0103292	0.00928555		0.0332894	0.00801114	0.00393044	0.000982124			0.0143451	0.0143451	0.00269774	0.00269774
C10H16NO+	166.123	2	0.000759694	0.000744396	0.000672708	0.00061852		0.00346257	0.000360914	0.00201797	5.31472e-05		0.0018189	0.000366105	0.00239562	0.00143848		0.00243566	0.00176241	0.00274221	0.00268472		0.00938778	0.00148239	0.00111217	0.000162578			0.00144679	0.00144679	0.000274001	0.000274001
C8H7O4+	167.034	2	0.000521948	0.000808182	0.000284655	0.000433907		0.0030302	0.000350978	0.00183611	0.000142079		0.00160451	0.000433333	0.0019093	0.000705061		0.00131808	0.000698641	0.00137254	0.00126849		0.00380931	0.00100261	0.000462714	0.000151353			0.00441597	0.00441597	0.000801617	0.000801617
C5H11O6+	167.055	2	0.000238389	0.000376479	0.000129639	0.000202297		0.000354552	0.000385744	0.000189155	0.00018796		0.000556536	0.000743035	0.00121706	0.0017		8.31849e-06	9.55718e-06	1.11773e-05	1.40733e-05		0.00709988	0.00789901	0.000879155	0.00106399			0.00336959	0.00336959	0.000616823	0.000616823
C6H15O5+	167.091	2	0.00424221	0.00848443	0.00228058	0.00456116		0.0718143	0.0217806	0.0450485	0.0109835		0.0455867	0.0247616	0.077965	0.076348		0.00460814	0.00149394	0.00414386	0.00353266		0.0281379	0.0203273	0.00333274	0.00264178			0.093457	0.093457	0.0174573	0.0174573
C10H15O2+	167.107	2	0.0187952	0.0302998	0.012739	0.0168744		0.342483	0.0286526	0.210464	0.0158046		0.227814	0.0548311	0.297711	0.179704		0.0437098	0.00437487	0.0322668	0.0193739		0.0675978	0.0253643	0.00831527	0.00382508			0.166878	0.166878	0.0316052	0.0316052
C11H19O+	167.143	2	0.00330118	0.00263491	0.00293912	0.00273456		0.00934594	0.000907869	0.00545423	8.72194e-05		0.00567367	0.00154968	0.00840539	0.00643059		0.00825534	0.00088033	0.00607851	0.00344498		0.0152995	0.00211543	0.00185896	0.000364687			0.0116643	0.0116643	0.00223071	0.00223071
C7H6NO4+	168.029	2	0.00029975	0.0005995	0.000162053	0.000324106		0.00439148	0.000462997	0.00275034	0.000284437		0.00204071	0.000722416	0.00249569	0.00125991		0.00271893	0.00274068	0.00348335	0.00372039		0.0085182	0.00143773	0.00101972	6.68513e-05			0.00165078	0.00165078	0.00030354	0.00030354
C4H10NO6+	168.05	2	0.000307082	0.000614164	0.000166038	0.000332076		0.00362907	0.000263723	0.00227139	0.000200601		0.00116869	0.000675585	0.00120308	0.000280065		0.00259451	0.00260375	0.00330677	0.00348774		0.00647266	0.000992888	0.000792029	0.000156508			0.00309395	0.00309395	0.000577861	0.000577861
C8H10NO3+	168.066	2	0.000252855	0.000505709	0.00013673	0.00027346		0.000504959	0.000316256	0.000341122	0.000169338		0.0015119	0.00124532	0.00287916	0.00336397		0.00145433	0.000970722	0.00162108	0.00156928		0.00537516	0.00177274	0.00066109	0.00026576			0.000892186	0.000892186	0.000170832	0.000170832
C9H14NO2+	168.102	2	0.000821136	0.00164227	0.000444122	0.000888243		0.0141575	0.00185208	0.00853025	0.000653824		0.00681847	0.0015238	0.00925355	0.00595507		0.00709307	0.00366125	0.00737902	0.00672671		0.0344336	0.0076615	0.00423265	0.00122132			0.00759067	0.00759067	0.0014247	0.0014247
C10H18NO+	168.138	2	0.000310271	0.000444637	0.000229779	0.000271585		0.00322626	0.000443406	0.00193817	0.000266795		0.000641161	0.000133429	0.000802195	0.000337894		0.0015845	0.000816757	0.00164174	0.0014819		0.00790336	0.000973468	0.000972362	0.000191341			0.000823583	0.000823583	0.000157915	0.000157915
C8H9O4+	169.05	2	0.00462159	0.00924318	0.00251382	0.00502764		0.100024	0.00815513	0.0636389	0.00669786		0.0782354	0.030611	0.0939044	0.0462438		0.0175869	0.0176785	0.0225993	0.0239589		0.0205245	0.00914838	0.00263134	0.00129174			0.0442593	0.0442593	0.00841146	0.00841146
C12H9O+	169.065	2	0.00178718	0.00357436	0.000972188	0.00194438		0.0582676	0.00615904	0.036199	0.00311718		0.00257286	0.00365395	0.00193296	0.00228223		0.004196	0.00422018	0.00539599	0.00572965		0.0255087	0.00549034	0.00316654	0.000852148			0.0631134	0.0631134	0.0117715	0.0117715
C9H13O3+	169.086	2	0.000586342	0.00117268	0.000318998	0.000637996		0.381165	0.0461081	0.236272	0.021995		0.368382	0.127783	0.463085	0.266668		0.0435224	0.00503809	0.0368549	0.0267083		0.0769944	0.0337514	0.00974361	0.0051041			0.1679	0.1679	0.032252	0.032252
C13H13+	169.101	2	0.00156304	0.00312609	0.000850448	0.0017009		0.0860242	0.0120717	0.0525561	0.00485817		0.0367035	0.0174111	0.0405901	0.0132769		0.00849109	0.00854396	0.0109276	0.0116182		0.0400733	0.0100915	0.00497329	0.00151556			0.103369	0.103369	0.0195071	0.0195071
C10H17O2+	169.122	2	0.00128511	0.00257021	0.00069931	0.00139862		0.0430679	0.00176754	0.026725	0.00157243		0.008934	0.000925769	0.0125421	0.00755716		0.00510548	0.000317084	0.00415889	0.0028949		0.00868831	0.00210003	0.00108595	0.000327937			0.0134161	0.0134161	0.002565	0.002565
C11H21O+	169.159	2	0.00074059	0.000764519	0.000623411	0.000593574		0.00489112	0.000628512	0.00282313	0.00029287		0.000139477	0.000141946	0.000173655	0.000200844		0.00393133	0.000660049	0.00278532	0.00147442		0.00707641	0.000762796	0.000879272	0.000151259			0.00613603	0.00613603	0.00119111	0.00119111
C12H25+	169.195	2	9.26077e-05	0.000185215	5.04157e-05	0.000100831		0.0023918	0.000279464	0.00145162	9.4347e-05		0	0	0	0		0.00182472	0.000276687	0.00151487	0.00104925		0.00845415	0.00135072	0.00106115	0.000260719			0.00678671	0.00678671	0.00139679	0.00139679
C10H4NO2+	170.024	2	1.66038e-05	3.32076e-05	9.08364e-06	1.81673e-05		0	0	0	0		6.45309e-06	1.44296e-05	7.15087e-06	1.59898e-05		0.000314115	0.000320312	9.49241e-05	9.55585e-05		0.00112073	0.000415113	0.000140774	5.94456e-05			0.000225607	0.000225607	4.17537e-05	4.17537e-05
C7H8NO4+	170.045	2	0.00039603	0.000548208	0.000222218	0.000299907		0.00198471	0.000278973	0.00123236	0.000126745		0.00195117	0.000641	0.00272887	0.00199873		0.00104206	0.000108852	0.000872817	0.000639143		0.00243553	0.000556363	0.000304495	8.72138e-05			0.00119604	0.00119604	0.000228341	0.000228341
C11H8NO+	170.06	2	0.000160179	0.000320357	8.76499e-05	0.0001753		0.00378399	0.000854764	0.00230314	0.000367852		0.00165767	0.000968406	0.00180516	0.000692366		0.00136463	0.00137733	0.00177176	0.00189823		0.00697164	0.00372823	0.000870265	0.000527083			0.00280075	0.00280075	0.000529017	0.000529017
C8H12NO3+	170.081	2	0.000680544	0.00136109	0.000372441	0.000744881		0.0240548	0.0027218	0.0150609	0.00139763		0.00707169	0.00307456	0.00800803	0.00262604		0.0055515	0.00451541	0.00667076	0.00680781		0.0330889	0.0212323	0.00428953	0.00323626			0.00288932	0.00288932	0.000561665	0.000561665
C12H12N+	170.096	2	0.000132616	0.000265232	7.25833e-05	0.000145167		0.000672196	0.000133054	0.000377415	4.82946e-05		2.38502e-06	5.33306e-06	4.54439e-06	1.01616e-05		0.00128391	0.00129579	0.00166723	0.001786		0.00906235	0.00271179	0.00111509	0.000361004			0.00205925	0.00205925	0.00039759	0.00039759
C9H16NO2+	170.118	2	0.00130981	0.00220393	0.000866839	0.00121472		0.00994866	0.0012729	0.00605056	0.000432084		0.00462126	0.00108978	0.00623502	0.00389019		0.00371207	0.00210706	0.00396939	0.00365518		0.0235116	0.00586803	0.00295704	0.000910778			0.00356231	0.00356231	0.000700735	0.000700735
C10H20NO+	170.154	2	0.00179917	0.00101502	0.0015344	0.00080773		0.00756353	0.000882282	0.00461284	0.00055192		0.000673177	0.000380478	0.000815881	0.000551234		0.00341101	0.0023957	0.00388167	0.0037573		0.0175718	0.00169703	0.00224368	0.00055589			0.0014078	0.0014078	0.000284498	0.000284498
C7H7O5+	171.029	2	0.00456293	0.00235989	0.00359514	0.0010502		0.0119901	0.00244614	0.00717941	0.000939445		0.00734761	0.00396614	0.00818584	0.00315098		0.002634	0.00180741	0.00302024	0.00293993		0.00502586	0.0012206	0.000649624	0.000216935			0.00757872	0.00757872	0.00141633	0.00141633
C11H7O2+	171.044	2	0	0	0	0		0.00579467	0.000911576	0.00377621	0.00069348		0	0	0	0		0.000380965	0.00038323	0.000482202	0.000487403		0.00517921	0.0021505	0.000665276	0.000317385			0.00237146	0.00237146	0.000452148	0.000452148
C8H11O4+	171.065	2	0.00149869	0.00299737	0.000824958	0.00164992		0.106733	0.0144335	0.0663275	0.00621047		0.0351563	0.0165116	0.0410942	0.0174095		0.00696238	0.00146032	0.0062838	0.00499824		0.018468	0.0109124	0.00243544	0.00169925			0.044046	0.044046	0.00842662	0.00842662
C12H11O+	171.08	2	0.0015771	0.00315421	0.000868201	0.0017364		0.0423564	0.00363856	0.0266688	0.002056		0.00707617	0.00361751	0.00758978	0.00218566		0.00423944	0.00427789	0.00553627	0.00592814		0.0138851	0.00439715	0.00180279	0.000745669			0.0251339	0.0251339	0.00473943	0.00473943
C9H15O3+	171.102	2	0.00425562	0.00707726	0.00286576	0.0039488		0.0718581	0.00837056	0.0443319	0.00313009		0.0399909	0.0110599	0.0512282	0.0270237		0.0114613	0.00136288	0.00861145	0.00519607		0.0243108	0.00432044	0.00307734	0.000690682			0.0585493	0.0585493	0.011322	0.011322
C13H15+	171.117	2	0.00108827	0.00158136	0.000833463	0.00102549		0.0193763	0.00383959	0.0116153	0.00145722		0.0124776	0.00328274	0.0161233	0.00853482		0.00544298	0.00287401	0.00579286	0.00524612		0.0200982	0.00630448	0.00250392	0.000620771			0.0532189	0.0532189	0.010345	0.010345
C10H19O2+	171.138	2	0.00171224	0.00167694	0.00153043	0.00154024		0.0167383	0.000906914	0.0103007	0.000327843		0.00291725	0.000488603	0.00376736	0.00155316		0.00258986	0.000663032	0.00240683	0.00194612		0.0068852	0.00100281	0.000877119	0.000176344			0.00990865	0.00990865	0.00191235	0.00191235
C11H23O+	171.174	2	0.000493217	0.00016374	0.000404107	8.45525e-05		0.00160276	0.000275699	0.000895046	0.000135805		0.000216426	0.000213253	0.000251378	0.000231906		0.00152355	0.000142611	0.00114737	0.000656635		0.00225302	0.000466539	0.000291257	8.75653e-05			0.00293327	0.00293327	0.000588533	0.000588533
C6H6NO5+	172.024	2	0.00169235	0.000941025	0.00133282	0.000455414		0.00209678	0.000423789	0.00127482	0.00016917		0.0011487	0.000605576	0.00129731	0.000492823		0.00150366	0.00151687	0.00197399	0.00211232		0.00381349	0.000659435	0.0004939	0.000121578			0.00120121	0.00120121	0.000229262	0.000229262
C10H6NO2+	172.039	2	0.000112236	0.000224472	6.21346e-05	0.000124269		0.00172366	0.000224089	0.0010979	0.000120434		0.000385592	5.80156e-05	0.000549325	0.000351531		0.00042904	0.000432513	0.000562913	0.00060136		0.00170401	0.00121173	0.000221946	0.000173763			1.66558e-05	1.66558e-05	3.47817e-06	3.47817e-06
C7H10NO4+	172.06	2	0.00016967	0.00033934	9.39422e-05	0.000187884		0.0028665	0.000395137	0.00180219	0.000182789		0.00167882	0.00069287	0.00201324	0.000905109		0.000962071	0.000526176	0.00104025	0.000970189		0.00435253	0.00121731	0.000555752	0.000187823			0.00193842	0.00193842	0.000373937	0.000373937
C8H14NO3+	172.097	2	0.00053199	0.00106398	0.000294613	0.000589225		0.0124626	0.00110234	0.00793772	0.000682061		0.0105633	0.00327889	0.01481	0.0109149		0.00597325	0.00379449	0.00668979	0.00634704		0.0313768	0.00861282	0.00400936	0.00127519			0.00477905	0.00477905	0.000934527	0.000934527
C12H14N+	172.112	2	9.80831e-05	0.000196166	5.43226e-05	0.000108645		0.00149053	0.000197714	0.000897506	5.22299e-05		0.000397383	0.000261394	0.000394379	0.000210048		0.00157414	0.00154186	0.00204569	0.0021699		0.0098255	0.00187255	0.0012499	0.00022913			0.00218805	0.00218805	0.000427905	0.000427905
C9H18NO2+	172.133	2	0.000346114	0.000496845	0.000257157	0.000297806		0.00249852	0.000182507	0.00156044	7.63416e-05		0.000966804	0.000165299	0.00129727	0.000694699		0.00157307	0.000742048	0.00162912	0.00143766		0.00873918	0.00169612	0.00112261	0.000262204			0.00122632	0.00122632	0.000241675	0.000241675
C10H22NO+	172.17	2	0.00105646	0.000816656	0.000883944	0.00061959		0.00214057	0.000251408	0.00127492	4.76762e-05		0.000450943	0.000186666	0.000561045	0.000312687		0.00113042	0.000873205	0.00134591	0.00133879		0.00697622	0.000873465	0.000901346	0.000185861			0.00122094	0.00122094	0.000238914	0.000238914
C10H5O3+	173.023	2	0.000523522	0.000378951	0.000369974	0.000175049		0.000210858	0.000167941	0.00013487	8.63706e-05		0	0	0	0		0.000438215	9.50173e-05	0.000323708	0.000205263		0.00255139	0.00209267	0.000314056	0.000241685			0.00139623	0.00139623	0.000258536	0.000258536
C7H9O5+	173.044	2	0.00248548	0.00226767	0.00158983	0.00133218		0.0383111	0.00616443	0.0239653	0.00263298		0.0154542	0.00564355	0.0187423	0.00761687		0.00484916	0.0033272	0.00561583	0.00544789		0.00822273	0.00164061	0.00107927	0.000307837			0.0182533	0.0182533	0.00346596	0.00346596
C11H9O2+	173.06	2	0.00204272	0.00408545	0.00113761	0.00227523		0.102952	0.0111865	0.0649447	0.00505176		0.013866	0.0118386	0.0114365	0.00820929		0.0103996	0.0104402	0.0136589	0.0144229		0.0358346	0.0143763	0.00477635	0.00241552			0.0426023	0.0426023	0.00823815	0.00823815
C8H13O4+	173.081	2	0.00202892	0.00405784	0.00113006	0.00226013		0.0932078	0.0102252	0.0596541	0.00572466		0.101314	0.0322164	0.140392	0.100604		0.0150998	0.00398463	0.0103005	0.00490463		0.0232151	0.00611085	0.00300116	0.000945376			0.0773406	0.0773406	0.0151387	0.0151387
C12H13O+	173.096	2	0.00779005	0.0155801	0.00433927	0.00867855		0.119219	0.0144397	0.0748558	0.00606982		0.0617961	0.0218559	0.0745007	0.0291871		0.0195878	0.019724	0.0258282	0.0275132		0.0540622	0.0142641	0.00713047	0.00228136			0.0910028	0.0910028	0.0174004	0.0174004
C9H17O3+	173.117	2	0.000866405	0.00173281	0.00048267	0.000965341		0.00901441	0.00112198	0.00562829	0.000435721		0.00316064	0.000745881	0.00434728	0.00270443		0.00119835	0.00108222	0.00152162	0.00161403		0.00604966	0.00141434	0.000778892	0.000200472			0.0102208	0.0102208	0.00198675	0.00198675
C13H17+	173.132	2	0.00220771	0.00232706	0.00197181	0.00208118		0.0331047	0.0053754	0.0200413	0.00179126		0.0128109	0.00213283	0.0165591	0.00679025		0.00977937	0.00385301	0.00986971	0.00842595		0.022899	0.00607752	0.00297428	0.000779718			0.0225219	0.0225219	0.00443139	0.00443139
C10H21O2+	173.154	2	0.000636526	0.000673743	0.000553532	0.000553633		0.00538504	0.000365154	0.00332019	5.5732e-05		0.000703284	0.000318235	0.000815751	0.00035491		0.000993062	0.000398132	0.00100156	0.000850727		0.00326851	0.000639539	0.000433796	0.000130178			0.00388417	0.00388417	0.000764461	0.000764461
C6H8NO5+	174.04	2	0.00199727	0.00227458	0.00130682	0.00123023		0.0207622	0.00223768	0.0137995	0.00182798		0.00540467	0.001217	0.00695037	0.0030736		0.00372821	0.00203386	0.00401091	0.00369359		0.0144658	0.00580334	0.0019305	0.000959683			0.00398728	0.00398728	0.000776025	0.000776025
C10H8NO2+	174.055	2	0.000208342	0.000416683	0.000116699	0.000233397		0.00240788	8.95494e-05	0.00155484	0.000116225		0.000938128	0.000519956	0.00129895	0.00116188		0.000427377	0.000427396	0.000558943	0.000578012		0.00379873	0.00169043	0.000511999	0.000278605			0.00132042	0.00132042	0.000256382	0.000256382
C7H12NO4+	174.076	2	0.000355942	0.000711885	0.000199399	0.000398797		0.00680478	0.000881954	0.00424493	0.00031908		0.00248185	0.00115216	0.00299335	0.00150439		0.00106691	0.00106694	0.00139275	0.00143503		0.00765934	0.00367837	0.00104178	0.00061084			0.00211525	0.00211525	0.000410397	0.000410397
C11H12NO+	174.091	2	0.000272854	0.000545708	0.000152866	0.000305732		0.00276759	0.000558511	0.00172485	0.000239061		0.000306604	0.000217596	0.000337527	0.000199044		0.00314412	0.00317738	0.00418425	0.00449578		0.0108642	0.00299552	0.00140298	0.000421987			0.00306185	0.00306185	0.000597886	0.000597886
C8H16NO3+	174.112	2	0.000460841	0.000921682	0.000258217	0.000516434		0.0078761	0.000771931	0.00502458	0.000389619		0.00179346	0.00102686	0.00190164	0.000450022		0.00156053	0.00142412	0.00197797	0.0020351		0.0137105	0.00398044	0.00181586	0.000667216			0.00253246	0.00253246	0.000503936	0.000503936
C12H16N+	174.128	2	2.25319e-05	4.50637e-05	1.26261e-05	2.52522e-05		0.000919828	0.000127701	0.000582939	5.72287e-05		0.000580743	5.50994e-05	0.00082881	0.000472174		0.00100965	0.000584446	0.00111413	0.00102167		0.00483492	0.00124154	0.000621822	0.000134204			0.000749049	0.000749049	0.000155151	0.000155151
C9H20NO2+	174.149	2	6.23723e-05	0.000124745	3.49556e-05	6.99112e-05		0.000542123	2.3394e-05	0.000342227	1.91623e-05		6.00939e-05	4.43885e-05	6.58129e-05	3.46147e-05		0.000340294	0.000237731	0.000387835	0.00036356		0.00283271	0.000472378	0.000374015	8.40666e-05			0.000408277	0.000408277	8.24709e-05	8.24709e-05
C6H7O6+	175.024	2	0.00101556	0.00096434	0.000644335	0.000560951		0.00404904	0.000914817	0.00244587	0.000363262		0.00105714	0.000390354	0.00126387	0.00044795		0.00128336	0.00116217	0.00165088	0.00171742		0.00405275	0.00119362	0.00053719	0.000186375			0.00368915	0.00368915	0.000691513	0.000691513
C14H7+	175.054	2	0.00457134	0.00489992	0.00282794	0.00284348		0.00506028	0.00170529	0.00323608	0.000844513		0.0020235	0.000853182	0.00340563	0.00299463		0.00240955	0.00065281	0.00227502	0.00193031		0.00585113	0.00590536	0.000707985	0.00067214			0.0143194	0.0143194	0.00271111	0.00271111
C7H11O5+	175.06	2	0.00413641	0.00606981	0.00236675	0.00342591		0.051159	0.00777808	0.0320477	0.00301338		0.0210635	0.0084635	0.0255697	0.0104954		0.0100341	0.0101328	0.0134195	0.0143949		0.0140561	0.00634075	0.00198864	0.0011309			0.043365	0.043365	0.00829985	0.00829985
C11H11O2+	175.075	2	0.00268518	0.00537036	0.00151292	0.00302584		0.201691	0.0311913	0.128029	0.0137182		0.0541175	0.0192978	0.0652411	0.0226985		0.0146686	0.014804	0.0196086	0.0210045		0.0446624	0.0229173	0.00616702	0.00381958			0.0604842	0.0604842	0.0119428	0.0119428
C8H15O4+	175.096	2	0.000383061	0.000766122	0.000215856	0.000431712		0.00924689	0.00156522	0.00601985	0.000840479		0.00377375	0.00138077	0.00621505	0.00537159		0.000432256	0.000294324	0.000489636	0.000485305		0.00538595	0.00261754	0.00070015	0.000359313			0.00849854	0.00849854	0.00167861	0.00167861
C12H15O+	175.112	2	0.00286969	0.00464884	0.00202918	0.0027032		0.0749624	0.00861551	0.0481578	0.00431939		0.0510729	0.012485	0.069747	0.0412243		0.0187338	0.00344688	0.0170223	0.0127043		0.0385885	0.0115361	0.00513698	0.00170809			0.0499844	0.0499844	0.0100313	0.0100313
C9H19O3+	175.133	2	0.00147694	0.00294248	0.000836416	0.00165649		0.0344159	0.00310054	0.0220359	0.00153895		0.00985455	0.00497331	0.011285	0.00435389		0.00270238	0.00275092	0.00363814	0.00396646		0.0261013	0.00783025	0.00342025	0.00109284			0.030913	0.030913	0.00619144	0.00619144
C13H19+	175.148	2	0.00161618	0.000704074	0.00147029	0.000977924		0.00375685	0.000883206	0.00225835	0.000512511		0.00141524	0.000725501	0.00214545	0.00130729		0.00534384	0.000144974	0.00433027	0.00273689		0.0124172	0.00286709	0.00165382	0.000412958			0.0133249	0.0133249	0.00273973	0.00273973
C10H23O2+	175.169	2	0.000431108	0.000189796	0.000359327	0.000132064		0.00105621	0.000205399	0.000641254	0.000119424		4.94634e-05	6.28866e-05	4.77638e-05	4.47696e-05		0.000576933	9.22525e-05	0.00051655	0.000374006		0.0017602	0.000302975	0.000238361	6.59952e-05			0.00292824	0.00292824	0.000597417	0.000597417
C6H10NO5+	176.055	2	0.00456821	0.00235927	0.00384554	0.00137854		0.00583227	0.000972308	0.00357157	0.000327349		0.00146998	0.00106171	0.00143708	0.000200459		0.00217932	0.00219069	0.00291723	0.00309283		0.00673207	0.00255215	0.000939569	0.000429692			0.000472056	0.000472056	9.29474e-05	9.29474e-05
C10H10NO2+	176.071	2	0.000417867	0.000835734	0.000236786	0.000473573		0.00688769	0.00146897	0.00432675	0.000636213		0.00182034	0.000511561	0.00239005	0.00116475		0.00345678	0.00347961	0.0046351	0.00493299		0.0110145	0.00270417	0.00145577	0.000376014			0.00379793	0.00379793	0.000759999	0.000759999
C7H14NO4+	176.092	2	0.000300075	0.00060015	0.00017006	0.000340119		0.0150665	0.00120939	0.00985475	0.000858187		0.00280411	0.00183257	0.00287282	0.000575255		0.00134129	0.00134149	0.00177666	0.00184083		0.0121095	0.00561162	0.00167638	0.000959166			0.00162894	0.00162894	0.000328792	0.000328792
C11H14NO+	176.107	2	0.000239948	0.000479897	0.000135996	0.000271992		0.00638669	0.000989447	0.00412503	0.000484308		0.00342687	0.00068475	0.00502495	0.00339903		0.00443804	0.00447387	0.00596119	0.00636801		0.0155333	0.00424012	0.00206739	0.000573615			0.00299038	0.00299038	0.000603625	0.000603625
C8H18NO3+	176.128	2	0.000207467	0.000414933	0.000117601	0.000235201		0.00397924	0.000395812	0.00248885	8.69094e-05		6.77138e-05	9.5807e-05	3.90906e-05	4.76188e-05		0.00125513	0.00125902	0.00167584	0.00176469		0.00888277	0.00253998	0.00121353	0.000460068			0.00112096	0.00112096	0.000228094	0.000228094
C12H18N+	176.143	2	1.71952e-05	3.43905e-05	9.74782e-06	1.94956e-05		0.000239448	3.29013e-05	0.00014989	1.11988e-05		0.00026374	3.03162e-05	0.000383586	0.000215116		0.000655469	0.000266156	0.000679604	0.00061764		0.0025766	0.000770087	0.000332394	6.51736e-05			0.000723919	0.000723919	0.00014834	0.00014834
C9H5O4+	177.018	2	0.00239173	0.00135742	0.0019897	0.000761749		0.00072821	6.48358e-05	0.000449372	1.92253e-05		0.000220381	0.000169747	0.000207985	0.000182121		0.000643592	0.000597659	0.000840172	0.000864315		0.00267245	0.00140311	0.000350145	0.000159879			0.00215279	0.00215279	0.000399152	0.000399152
C6H9O6+	177.039	2	0.00535914	0.00391314	0.00388631	0.00202271		0.00981327	0.0022654	0.00612659	0.000970155		0.00361262	0.00107947	0.0056112	0.00438264		0.00286233	0.00120353	0.00300203	0.00270562		0.0120427	0.00432302	0.00161956	0.000638309			0.0154467	0.0154467	0.00294879	0.00294879
C10H9O3+	177.055	2	0.00267997	0.00535994	0.00152715	0.00305431		0.04013	0.00485531	0.0259105	0.00225		0.0120165	0.00455388	0.0144826	0.00486799		0.0107917	0.0109226	0.0146266	0.0157678		0.0106894	0.00425295	0.00152609	0.000768586			0.01154	0.01154	0.00229637	0.00229637
C7H13O5+	177.076	2	0.00194246	0.00388492	0.00110702	0.00221405		0.0261765	0.00483109	0.0171791	0.00253821		0.0106399	0.0035631	0.0174081	0.0147089		0.00489397	0.0027567	0.00549154	0.00514411		0.0169031	0.0082855	0.00230865	0.00129028			0.0267794	0.0267794	0.00527439	0.00527439
C11H13O2+	177.091	2	0.00212932	0.00425863	0.00121362	0.00242724		0.139611	0.0159083	0.0912952	0.00882324		0.0528436	0.015111	0.069883	0.0370767		0.0152639	0.0120922	0.0189032	0.0188167		0.032387	0.0150554	0.00455499	0.00252987			0.0386219	0.0386219	0.00780105	0.00780105
C8H17O4+	177.112	2	0.000888075	0.00177615	0.000506226	0.00101245		0.0307951	0.00361426	0.0202364	0.00210837		0.00690645	0.00308756	0.00836497	0.00362052		0.00273713	0.00245993	0.00356582	0.00388119		0.00616766	0.00342801	0.000816912	0.000473967			0.010573	0.010573	0.00211844	0.00211844
C12H17O+	177.127	2	0.00285196	0.00429352	0.00218704	0.00273167		0.0999333	0.0106381	0.065029	0.00558772		0.047362	0.00893907	0.0691315	0.0450754		0.0264589	0.00266394	0.0207379	0.011934		0.0594395	0.0171954	0.00809956	0.00265974			0.0501218	0.0501218	0.0102418	0.0102418
C9H21O3+	177.149	2	0.000229116	0.000458232	0.000130629	0.000261258		0.00266973	0.000224116	0.00182184	0.000244556		0.000455397	0.000131733	0.000654473	0.000384809		0.000639085	8.42896e-05	0.000514393	0.000329776		0.00370118	0.00112893	0.000487556	0.00012666			0.00243548	0.00243548	0.000504018	0.000504018
C13H21+	177.164	2	0.000932516	0.000579619	0.000851537	0.000692552		0.00588418	0.0011165	0.00376224	0.000705532		0.000922949	0.000456327	0.00143959	0.000882495		0.00423999	0.000685292	0.00385041	0.00281931		0.0123164	0.00272616	0.00169285	0.00046672			0.0118122	0.0118122	0.00253255	0.00253255
C9H8NO3+	178.05	2	0.000762421	0.000762263	0.000483075	0.000440165		0.00326367	0.00063444	0.00209844	0.00028778		0.000778599	0.000275636	0.00109273	0.000739521		0.00144131	0.00088652	0.00167065	0.00161201		0.00499237	0.00252989	0.000660241	0.000316109			0.00169456	0.00169456	0.000331327	0.000331327
C6H12NO5+	178.071	2	0.00233693	0.0024757	0.00145626	0.00141639		0.0136467	0.0020838	0.00859995	0.000743021		0.00120197	0.0014449	0.000833083	0.000625795		0.00245742	0.00247275	0.00333138	0.003542		0.0098726	0.00293073	0.00142361	0.000627985			0.00756741	0.00756741	0.00145186	0.00145186
C7H16NO4+	178.107	2	0.000175588	0.000351176	0.000100655	0.000201311		0.00391994	0.000147962	0.00262549	0.000247122		8.22891e-05	0.000124882	5.01248e-05	5.46841e-05		0.000398169	0.000398302	0.00053406	0.000554514		0.00482333	0.00271885	0.000674439	0.000450629			0.00131632	0.00131632	0.00026048	0.00026048
C11H16NO+	178.123	2	0.000155117	0.000310234	8.89281e-05	0.000177856		0.00294882	0.000389599	0.0019065	0.00017181		0.0016767	0.00037941	0.00235239	0.00143535		0.00233071	0.00233704	0.00314541	0.00330751		0.0114141	0.00282191	0.0015598	0.000396854			0.00145	0.00145	0.000296075	0.000296075
C12H20N+	178.159	2	3.2272e-05	6.45439e-05	1.85052e-05	3.70104e-05		0.000468239	3.97706e-05	0.000294292	1.11786e-06		8.09377e-05	2.16453e-05	0.000120475	7.06418e-05		0.000742721	0.00043197	0.000839969	0.000773036		0.00476697	0.000767512	0.000650124	9.67449e-05			0.00069479	0.00069479	0.000145284	0.000145284
C9H7O4+	179.034	2	0.0010429	0.0020858	0.000600966	0.00120193		0.00954982	0.00159035	0.00597947	0.000559598		0.00308065	0.00184861	0.00321879	0.000708349		0.00217128	0.00152533	0.00261797	0.00253064		0.00262311	0.00116779	0.000360313	0.000181668			0.00245487	0.00245487	0.000487074	0.000487074
C10H11O3+	179.07	2	0.00721471	0.0144294	0.0041583	0.0083166		0.16799	0.0236673	0.107668	0.00904676		0.0543871	0.0237056	0.0648017	0.0203178		0.0422361	0.042662	0.0578003	0.0620354		0.0654542	0.0614854	0.0099315	0.0104133			0.0252273	0.0252273	0.00511541	0.00511541
C7H15O5+	179.091	2	0.00167705	0.0033541	0.000966708	0.00193342		0.0954782	0.0125723	0.0628388	0.00645162		0.0252501	0.00592121	0.0388002	0.0270551		0.0121732	0.00850053	0.0146657	0.0147027		0.0294114	0.0155097	0.0041326	0.00261042			0.100988	0.100988	0.0198554	0.0198554
C11H15O2+	179.107	2	0.00427795	0.0085559	0.00246616	0.00493232		0.153013	0.0095725	0.104507	0.0121757		0.0799188	0.0197401	0.11287	0.0705628		0.0226306	0.00560361	0.0218987	0.0172639		0.0465917	0.0157568	0.00666126	0.00279875			0.0677568	0.0677568	0.0138005	0.0138005
C8H19O4+	179.128	2	0.000470781	0.000941562	0.000271429	0.000542858		0.00828728	0.000676118	0.00574253	0.000795307		0.00283524	0.00115119	0.00361497	0.00185239		0.000747422	0.000781465	0.00104401	0.00118589		0.0028435	0.00128884	0.000381173	0.000169997			0.00434335	0.00434335	0.000884873	0.000884873
C12H19O+	179.143	2	0.00272119	0.00294293	0.0025094	0.00270689		0.022922	0.00185109	0.0148553	0.000714364		0.0157819	0.00342147	0.024326	0.0174495		0.0129975	0.000874547	0.0108049	0.00674528		0.0255974	0.00516975	0.00354343	0.000709919			0.0178623	0.0178623	0.00371373	0.00371373
C13H23+	179.179	2	0.000230829	0.000352949	0.000176472	0.000222614		0.00310017	0.000275837	0.00195283	1.2679e-05		0.000164952	0.000122516	0.000224761	0.000197434		0.00237383	0.000360534	0.0021518	0.00154182		0.00879694	0.00126822	0.00123454	0.000272676			0.00452378	0.00452378	0.00099364	0.00099364
C12H6NO+	180.044	2	0.000416969	0.000589089	0.000245918	0.000342662		0.00224737	0.000471012	0.00143498	0.000202258		0.00031355	0.000271175	0.000260342	0.000155727		0.00143856	0.00145112	0.00197699	0.00211524		0.0047323	0.00182811	0.000667421	0.000304621			0.000666204	0.000666204	0.000136576	0.000136576
C9H10NO3+	180.066	2	0.000318804	0.000637608	0.000184774	0.000369549		0.00567709	0.000945459	0.00365615	0.00038965		0.00256281	0.00107485	0.0033718	0.0019254		0.00187556	0.00078576	0.00200249	0.00181021		0.0124948	0.00483751	0.00176022	0.000766866			0.0021505	0.0021505	0.000430208	0.000430208
C13H10N+	180.081	2	0	0	0	0		0.0185274	0.00446001	0.0117293	0.00195282		0.0144905	0.0102132	0.0158411	0.00529438		0.0105646	0.00589518	0.0120428	0.0112215		0.0218791	0.0156792	0.00301392	0.00241568			0.00120256	0.00120256	0.00023901	0.00023901
C10H14NO2+	180.102	2	0.000448384	0.000896768	0.00025993	0.00051986		0.0118062	0.0012294	0.00782848	0.00068199		0.00502904	0.00120671	0.00708168	0.00421406		0.00544936	0.00546343	0.00743465	0.0078138		0.024289	0.00510023	0.0034491	0.000952007			0.00555409	0.00555409	0.00113098	0.00113098
C11H18NO+	180.138	2	0.000145904	0.000291809	8.45984e-05	0.000169197		0.00204987	0.000293548	0.00132135	0.000113517		0.00099204	0.000212345	0.00142098	0.000881805		0.00159042	0.000742968	0.00173817	0.00157452		0.00908146	0.00164738	0.00127114	0.000245915			0.000973028	0.000973028	0.000200447	0.000200447
C12H22N+	180.175	2	2.50788e-05	5.01577e-05	1.45442e-05	2.90884e-05		0.000359362	3.74857e-05	0.000230406	9.85765e-06		1.22447e-05	9.5635e-06	1.81118e-05	1.57922e-05		0.000533388	0.000163244	0.000537002	0.000447684		0.00365268	0.000539507	0.000512857	9.17963e-05			0.000435411	0.000435411	9.31007e-05	9.31007e-05
C5H9O7+	181.034	2	0.000314256	0.000628512	0.000183124	0.000366247		0	0	0	0		0.00084813	0.00067759	0.00174835	0.00192431		0.000226142	0.000238767	7.1161e-05	7.11898e-05		0.00237802	0.00161256	0.000321078	0.000215612			0.00146431	0.00146431	0.000282034	0.000282034
C9H9O4+	181.05	2	0.00231704	0.00392399	0.00136152	0.00228458		0.0257296	0.00377733	0.0167017	0.0015162		0.00864567	0.0047412	0.00957076	0.00162643		0.00431455	0.00436081	0.00597345	0.00642022		0.0102495	0.00156325	0.00148911	0.000424736			0.0178113	0.0178113	0.00356341	0.00356341
C6H13O6+	181.071	2	0.00229277	0.00458553	0.00133631	0.00267263		0.0565749	0.0138585	0.0372051	0.00679082		0.0128998	0.0060788	0.0228753	0.0214023		0.00944554	0.00955184	0.0130847	0.0140795		0.0416493	0.0295397	0.00618951	0.00507559			0.046012	0.046012	0.00914407	0.00914407
C10H13O3+	181.086	2	0	0	0	0		0.211226	0.0399391	0.136046	0.0168148		0.0767441	0.0412912	0.0909571	0.0318137		0.0162842	0.00831565	0.0182158	0.016667		0.0352206	0.0332122	0.00534761	0.00561483			0.0297578	0.0297578	0.00617435	0.00617435
C14H13+	181.101	2	0	0	0	0		0.0569656	0.00718444	0.0371453	0.00285047		0.00675837	0.0051151	0.00705023	0.00282636		0.00222016	0.00223438	0.00306181	0.00325687		0.0172895	0.00971038	0.00253159	0.00170722			0.0573256	0.0573256	0.0120771	0.0120771
C11H17O2+	181.122	2	0.00109302	0.00218604	0.000637238	0.00127448		0.048508	0.00481928	0.0325777	0.00304235		0.0296431	0.00835339	0.0432689	0.0299894		0.00870926	0.000436542	0.00756897	0.00509241		0.0165853	0.00636759	0.00239709	0.00113026			0.0246454	0.0246454	0.00510733	0.00510733
C12H21O+	181.159	2	0.00027258	0.000394764	0.000221784	0.000272644		0.00209052	0.000273644	0.00128233	8.12261e-05		0.00109077	0.000406589	0.00183978	0.00142841		0.002291	0.000248444	0.00183373	0.00104556		0.00452333	0.00084985	0.00064515	0.000139889			0.00288867	0.00288867	0.00060601	0.00060601
C8H8NO4+	182.045	2	0.000154736	0.000309472	9.06741e-05	0.000181348		0.001209	0.000283108	0.000804721	0.000142431		0.00112869	0.000357373	0.00161865	0.00105779		0.000740214	0.00017917	0.000724799	0.000598746		0.00184522	0.000526856	0.00026755	9.58101e-05			0.000168678	0.000168678	3.4576e-05	3.4576e-05
C12H8NO+	182.06	2	0.000851612	0.00170322	0.00049908	0.00099816		0.0200863	0.0034178	0.0131318	0.00147778		0.00224565	0.00222229	0.00199801	0.000579289		0.00411032	0.0041668	0.00573658	0.00620456		0.0142781	0.00743422	0.00209013	0.00127442			0.00804832	0.00804832	0.00162057	0.00162057
C9H12NO3+	182.081	2	0.000160588	0.000321176	9.41222e-05	0.000188244		0.0135582	0.00269154	0.0089026	0.00124394		0.0071078	0.00252542	0.00986127	0.00608482		0.00421208	0.00363786	0.00553604	0.00569894		0.0159171	0.00834876	0.00237189	0.00150719			0.00385744	0.00385744	0.000798368	0.000798368
C13H12N+	182.096	2	0.00320346	0.0012075	0.00290813	0.000892839		0.00526836	0.000381564	0.00344866	0.000109324		0.00656076	0.00387778	0.00795625	0.00417361		0.00752454	0.00760167	0.0104739	0.0112456		0.0135588	0.00458136	0.00202598	0.000982816			0.00471628	0.00471628	0.000951921	0.000951921
C10H16NO2+	182.118	2	0.000534652	0.0010693	0.000313428	0.000626856		0.0104297	0.000762667	0.00711714	0.000683712		0.00450965	0.000859186	0.00646318	0.00374844		0.00395494	0.00347815	0.00522018	0.0053587		0.0271455	0.0069069	0.00395227	0.00132014			0.00276035	0.00276035	0.000575091	0.000575091
C11H20NO+	182.154	2	9.80954e-05	0.000196191	5.75178e-05	0.000115036		0.00149843	0.000156932	0.000959783	2.75501e-05		0.000351348	0.000164547	0.000475509	0.000270055		0.00164133	0.000840526	0.00183251	0.00162806		0.00938785	0.00119866	0.00135966	0.000281645			0.000743273	0.000743273	0.000156971	0.000156971
C8H7O5+	183.029	2	0.000237883	0.000475765	0.000140155	0.00028031		0	0	0	0		0.000751855	0.00057427	0.000707398	0.000586307		0.00266558	0.00267505	0.0008836	0.000906772		0.00393159	0.000731795	0.000571839	0.000139176			0.00248391	0.00248391	0.000484769	0.000484769
C9H11O4+	183.065	2	0.0059602	0.0119204	0.00351231	0.00702463		0.236731	0.0403056	0.155295	0.0172601		0.0739154	0.0448055	0.0864355	0.0326616		0.0196155	0.0198582	0.027499	0.0296595		0.029724	0.0134492	0.00455634	0.0025093			0.0635278	0.0635278	0.0130748	0.0130748
C13H11O+	183.08	2	0.000655309	0.00131062	0.000386202	0.000772405		0.0284255	0.00180191	0.0191705	0.00131446		0	0	0	0		0.00173811	0.0017387	0.00239681	0.00248868		0.0123791	0.00269118	0.00181885	0.000527349			0.0467465	0.0467465	0.00975951	0.00975951
C10H15O3+	183.102	2	0.00205275	0.00410549	0.00120991	0.00241983		0.179917	0.0276796	0.118739	0.012026		0.134551	0.0630678	0.171388	0.0865772		0.029002	0.0292507	0.0405315	0.0433499		0.0450114	0.0228873	0.00698893	0.00430535			0.0611403	0.0611403	0.0127141	0.0127141
C14H15+	183.117	2	0.000203313	0.000406627	0.000119845	0.000239691		0.0212984	0.0030273	0.0142122	0.00144439		0.00629196	0.00301458	0.00756353	0.0025863		0.00201492	0.00202568	0.00280639	0.00297639		0.010799	0.00221698	0.00159932	0.000468982			0.0208058	0.0208058	0.0043909	0.0043909
C11H19O2+	183.138	2	0.000551424	0.00110285	0.000325081	0.000650162		0.0127834	0.000611288	0.00849132	0.000354376		0.00303444	0.000546506	0.0047131	0.00303543		0.00322304	0.000514582	0.00249197	0.00132081		0.00687054	0.00152816	0.00100779	0.000270539			0.00868747	0.00868747	0.00181699	0.00181699
C12H23O+	183.174	2	0.000188173	0.000376347	0.000110956	0.000221912		0.00277959	0.000372423	0.0017149	0.000123724		5.91183e-05	0.000110872	7.79367e-05	0.000132911		0.00245183	0.000518449	0.00184201	0.00095138		0.00500721	0.000645247	0.000722512	8.80654e-05			0.00395028	0.00395028	0.000821149	0.000821149
C13H27+	183.211	2	8.56144e-05	0.000171229	5.04924e-05	0.000100985		0.00231157	0.00021356	0.00147697	3.00518e-05		1.07645e-05	2.40702e-05	1.28591e-05	2.87539e-05		0.00170198	0.000324591	0.0016121	0.00120376		0.00802683	0.00184661	0.00116951	0.000280306			0.00642581	0.00642581	0.00142707	0.00142707
C8H10NO4+	184.06	2	0.000168207	0.000336414	9.96653e-05	0.000199331		0.00375737	0.000652149	0.0024799	0.000283964		0.00194515	0.000996765	0.00250083	0.00135525		0.000759283	0.000759964	0.00105485	0.00109987		0.00174162	0.000813938	0.000270977	0.000150735			0.000831996	0.000831996	0.000169526	0.000169526
C12H10NO+	184.076	2	0.000125233	0.000250465	7.42085e-05	0.000148417		0.00148983	0.00027505	0.000992027	0.000128864		0.001005	0.00049271	0.00115829	0.00025958		0.00190772	0.00194796	0.00270561	0.00296596		0.00603023	0.00280495	0.000887517	0.000486035			0.00322375	0.00322375	0.000665967	0.000665967
C9H14NO3+	184.097	2	0.00022189	0.000443781	0.0001315	0.000262999		0.0154825	0.0022077	0.0103108	0.000979877		0.00480948	0.00228563	0.00582653	0.00191794		0.0040969	0.00412283	0.00574352	0.00610818		0.019574	0.0140756	0.00302518	0.00250326			0.00134695	0.00134695	0.000280503	0.000280503
C13H14N+	184.112	2	4.3232e-05	8.64641e-05	2.56229e-05	5.12458e-05		0.000307303	2.879e-05	0.000196688	5.9518e-06		0	0	0	0		0.000685829	0.000686498	0.000942639	0.000963487		0.00488569	0.00161527	0.000707781	0.000261744			0.00121459	0.00121459	0.000260451	0.000260451
C10H18NO2+	184.133	2	0.000531622	0.00106324	0.00031512	0.000630239		0.0074886	0.000597035	0.00509991	0.000410953		0.00299698	0.000606076	0.00439012	0.00265843		0.00258218	0.00134968	0.00294827	0.00269119		0.0145615	0.00513584	0.00216244	0.000935734			0.00202099	0.00202099	0.000442066	0.000442066
C11H22NO+	184.17	2	0.00010373	0.00020746	6.14983e-05	0.000122997		0.00129087	0.000140942	0.000842126	3.55223e-05		5.72309e-05	4.82895e-05	7.92175e-05	6.8699e-05		0.00286673	0.00172698	0.00334783	0.00305694		0.0140998	0.00143683	0.00211063	0.000521238			0.00129258	0.00129258	0.000284498	0.000284498
C8H9O5+	185.044	2	0.00224443	0.00219684	0.0014913	0.00134086		0.0144643	0.00281001	0.00945526	0.00118177		0.0172382	0.00768464	0.0223059	0.0111128		0.00270069	0.000556717	0.00214026	0.00121371		0.00377959	0.000759958	0.000565736	0.000160684			0.00987593	0.00987593	0.00202419	0.00202419
C12H9O2+	185.06	2	0.00126487	0.00147316	0.000790988	0.000888408		0.00691503	0.000995433	0.00450599	0.000333965		0.000832277	0.000759713	0.000696279	0.000454102		0.00183575	0.00185566	0.00259846	0.00279353		0.00224363	0.000871682	0.000348687	0.000177886			0.00419815	0.00419815	0.00081979	0.00081979
C9H13O4+	185.081	2	0.000695466	0.00139093	0.000414372	0.000828743		0.0418228	0.00685045	0.0276556	0.00285563		0.0140696	0.00756136	0.017312	0.00705747		0.00345924	0.00185961	0.00401229	0.00370244		0.00769258	0.00376752	0.00118302	0.000709747			0.0151552	0.0151552	0.00313029	0.00313029
C13H13O+	185.096	2	0.00319972	0.00639944	0.00190661	0.00381322		0.111805	0.016963	0.074655	0.00747606		0.0250995	0.00882299	0.0322608	0.0119648		0.0176332	0.0178464	0.0249901	0.026938		0.0320217	0.00990818	0.0049078	0.00195207			0.051702	0.051702	0.0106763	0.0106763
C10H17O3+	185.117	2	0.000692023	0.00138405	0.000412402	0.000824803		0.0193361	0.00213152	0.0130051	0.000967558		0.00660311	0.00115045	0.00956317	0.00533136		0.00217733	0.00098942	0.00242967	0.0022022		0.00608999	0.00120109	0.000902907	0.000218965			0.0105098	0.0105098	0.00221928	0.00221928
C14H17+	185.132	2	0.000345729	0.000691458	0.000206049	0.000412099		0.014591	0.00227418	0.00981558	0.00107711		0.0063064	0.00120803	0.00891408	0.00439507		0.00237821	0.00146653	0.00285016	0.00266524		0.0108882	0.00306111	0.00159144	0.00035385			0.0245239	0.0245239	0.00537688	0.00537688
C11H21O2+	185.154	2	0.000317453	0.000634906	0.000189219	0.000378439		0.0102706	0.00130386	0.00670759	0.000385636		0.00168633	0.000397228	0.00226677	0.000903427		0.00228636	0.000695199	0.00236006	0.00193566		0.00567914	0.00103878	0.000842511	0.000173766			0.00819074	0.00819074	0.00176837	0.00176837
C12H25O+	185.19	2	0.000238709	0.000316354	0.000184663	0.000187192		0.00200722	0.000467646	0.00122625	0.000196262		0.000277653	0.000217985	0.00035968	0.000308693		0.00145018	0.000272096	0.00111461	0.000588436		0.00250833	0.000412516	0.0003761	8.61916e-05			0.00282305	0.00282305	0.000591076	0.000591076
C3H8NO8+	186.024	2	0.000147508	0.000177009	9.20864e-05	0.000109486		0.00015086	3.4783e-05	0.000104816	1.95444e-05		8.29288e-05	6.10622e-05	0.00015871	0.000127302		0.000263735	0.000265262	0.000373395	0.000396514		0.00132293	0.000632293	0.000196306	9.64175e-05			0.000268395	0.000268395	5.47673e-05	5.47673e-05
C7H8NO5+	186.04	2	0.000403464	0.000405861	0.000266318	0.000245817		0.00255798	0.000576699	0.00166647	0.000251827		0.00139638	0.000785017	0.00169535	0.000701468		0.000918334	0.000905617	0.00129445	0.00137862		0.00178	0.000692838	0.000271184	0.000114294			0.00164155	0.00164155	0.000334647	0.000334647
C11H8NO2+	186.055	2	0.000126134	0.000252268	7.55508e-05	0.000151102		0.00184454	0.000389394	0.0012355	0.000184699		0.000601043	0.000180519	0.000820031	0.000383997		0.000738056	0.000592093	0.000960191	0.000944179		0.00351711	0.00198134	0.000515472	0.000292519			0.000694148	0.000694148	0.000140152	0.000140152
C8H12NO4+	186.076	2	0.000278684	0.000557368	0.000166943	0.000333886		0.00565349	0.000482506	0.00399225	0.00046428		0.00252175	0.000942396	0.00334908	0.0016036		0.00270405	0.00272197	0.0038331	0.00407971		0.00574313	0.00201397	0.000887906	0.000363856			0.00124395	0.00124395	0.000261309	0.000261309
C12H12NO+	186.091	2	4.92122e-05	9.84244e-05	2.94825e-05	5.8965e-05		0.00139199	0.000140673	0.000957489	8.63163e-05		3.81221e-05	5.37791e-05	2.58231e-05	2.53389e-05		0.000621533	0.00063412	0.000890726	0.000975035		0.00352382	0.00119659	0.000533897	0.000210836			0.00552303	0.00552303	0.0011574	0.0011574
C9H16NO3+	186.112	2	0.000155159	0.000310319	9.2965e-05	0.00018593		0.0113934	0.00107513	0.00768438	0.000457432		0.00349652	0.00144546	0.00458304	0.00230251		0.00260886	0.00261007	0.00365954	0.00380411		0.0206587	0.00769859	0.00320299	0.00150069			0.00228803	0.00228803	0.000484644	0.000484644
C13H16N+	186.128	2	3.32988e-05	6.65977e-05	1.99529e-05	3.99058e-05		0.00125919	0.000222442	0.000834035	9.37556e-05		0.000575885	9.23794e-05	0.000857253	0.000481685		0.00101995	0.00102812	0.00144832	0.00154694		0.00584839	0.0014298	0.000874012	0.00025449			0.00139797	0.00139797	0.000300526	0.000300526
C10H20NO2+	186.149	2	0.000102168	0.000204337	6.1227e-05	0.000122454		0.0037404	0.000320541	0.0025357	0.000155064		0.000602368	0.000122739	0.000833895	0.000360569		0.000872709	0.000703834	0.00113965	0.00114991		0.00535437	0.00180969	0.000816984	0.000343462			0.000568889	0.000568889	0.000121872	0.000121872
C11H24NO+	186.185	2	5.9282e-05	0.000118564	3.55332e-05	7.10665e-05		0.000595566	9.02509e-05	0.000382282	2.80288e-05		6.7206e-05	2.51947e-05	8.68441e-05	4.22671e-05		0.000554709	0.000418985	0.000710183	0.00071159		0.00406071	0.000643572	0.000612456	0.000133855			0.000546664	0.000546664	0.000117066	0.000117066
C7H7O6+	187.024	2	0.00234302	0.00139431	0.00221247	0.00103308		0.00075175	0.000158108	0.000441176	9.00917e-05		0.000140721	0.000201551	8.30615e-05	0.000118165		0.000473142	0.000426651	0.000634701	0.000629656		0.000560694	0.000308325	8.96821e-05	5.67281e-05			0.00146112	0.00146112	0.000278343	0.000278343
C11H7O3+	187.039	2	0.000411695	0.00082339	0.000247905	0.00049581		0.00525971	0.00163257	0.00344236	0.000789607		0.00190846	0.000694188	0.0026712	0.00138593		0.00151628	0.00066759	0.00169371	0.00152192		0.00533188	0.00331682	0.000780049	0.000448152			0.0031487	0.0031487	0.000650653	0.000650653
C8H11O5+	187.06	2	0.00210075	0.0042015	0.00126512	0.00253025		0.0811035	0.0113959	0.0554558	0.00572829		0.0266875	0.0100707	0.035413	0.0163508		0.0179108	0.0180364	0.0255348	0.0272048		0.0196865	0.00549802	0.0030691	0.00112215			0.0259663	0.0259663	0.00540007	0.00540007
C12H11O2+	187.075	2	0.00184919	0.00369838	0.00111372	0.00222744		0.0728212	0.00955068	0.0493095	0.00425055		0.0155645	0.00984363	0.0164698	0.00406636		0.00566454	0.00570451	0.00807679	0.008606		0.0188836	0.00741538	0.00299911	0.00150697			0.0252503	0.0252503	0.00529057	0.00529057
C9H15O4+	187.096	2	0.000171196	0.000342392	0.000103119	0.000206237		0.0201702	0.0028032	0.0137251	0.00133399		0.0133144	0.00448253	0.0188333	0.0114758		0.0013011	0.000526957	0.000868587	0.00034263		0.00371633	0.00147749	0.000570201	0.000279606			0.00981644	0.00981644	0.00207443	0.00207443
C13H15O+	187.112	2	0.00229314	0.00458627	0.00138137	0.00276273		0.0741492	0.00858926	0.0507917	0.00443734		0.028695	0.00911284	0.0387997	0.0180922		0.0136161	0.0136938	0.0193891	0.0205851		0.0294346	0.00864086	0.00457534	0.0016396			0.0336827	0.0336827	0.00710562	0.00710562
C10H19O3+	187.133	2	0.000748849	0.0014977	0.000451152	0.000902304		0.0183076	0.00192548	0.0125225	0.000981263		0.00354257	0.000764494	0.00518367	0.00297422		0.00231388	0.00236709	0.00334026	0.00367334		0.00811702	0.00117543	0.00123041	0.000240162			0.00968133	0.00968133	0.00205159	0.00205159
C14H19+	187.148	2	0.00111641	0.000965097	0.00117798	0.00122937		0.00660935	0.0016212	0.00410842	0.000696681		0.00373431	0.000846708	0.0052466	0.0024439		0.00242074	0.00123315	0.00279336	0.00250568		0.00777655	0.00249508	0.00117298	0.000337777			0.0065333	0.0065333	0.00140271	0.00140271
C11H23O2+	187.169	2	0.000225239	0.000260624	0.000200296	0.000197698		0.00214341	0.000362187	0.00137642	0.000125137		0.000219456	0.000141945	0.000264833	0.000175736		0.00042462	2.80928e-05	0.000365181	0.000231218		0.00156452	0.00023597	0.000241515	6.25045e-05			0.00195519	0.00195519	0.000416279	0.000416279
C6H6NO6+	188.019	2	0.00132733	0.00064521	0.00121958	0.000411336		0.00163429	0.000338583	0.0010602	0.000137939		0.00053025	0.0002428	0.000647634	0.000181547		0.00134127	0.00134415	0.00190928	0.00200316		0.00287419	0.000440657	0.00044338	0.000101793			0.000869943	0.000869943	0.000176886	0.000176886
C10H6NO3+	188.034	2	0.000109627	0.000155383	6.75285e-05	9.43989e-05		9.97907e-05	2.01653e-05	6.8885e-05	1.05949e-05		1.23062e-05	2.24026e-05	2.34152e-05	3.87112e-05		0.000378005	0.000395574	0.000554616	0.000630738		0.00106478	0.000626085	0.000168292	0.000113612			4.61829e-05	4.61829e-05	8.93074e-06	8.93074e-06
C7H10NO5+	188.055	2	0.000722444	0.000803966	0.000467503	0.000486767		0.00941726	0.00151597	0.0064258	0.000723338		0.00333001	0.00158222	0.00424476	0.00178446		0.00211171	0.00111683	0.00247711	0.00227739		0.00534518	0.00178451	0.000829472	0.000351589			0.00211173	0.00211173	0.000439253	0.000439253
C11H10NO2+	188.071	2	0.000144029	0.000288058	8.72089e-05	0.000174418		0.000426948	0.00010171	0.000278257	6.37687e-05		1.8563e-05	1.89258e-05	3.07946e-05	3.5398e-05		0.000879042	0.000918553	0.00128917	0.00146324		0.00393183	0.00211089	0.000608514	0.000385968			0.000791254	0.000791254	0.00016932	0.00016932
C8H14NO4+	188.092	2	0.000142932	0.000285864	8.65544e-05	0.000173109		0.00451106	0.000654063	0.00298484	0.000222436		0.000877061	0.000771797	0.000830043	0.000191681		0.000565366	0.000576219	0.000818442	0.000894265		0.00507466	0.00236447	0.00081158	0.000470155			0.00110503	0.00110503	0.000232359	0.000232359
C12H14NO+	188.107	2	0.000125233	0.000250466	7.58429e-05	0.000151686		0.00330296	0.000487454	0.00229321	0.00026993		0.00149512	0.000257236	0.00225208	0.0013404		0.00306899	0.00309396	0.00440504	0.00470636		0.0077632	0.0025171	0.00118721	0.000457271			0.00154346	0.00154346	0.000335638	0.000335638
C9H18NO3+	188.128	2	0.000102849	0.000205698	6.22937e-05	0.000124587		0.00431765	0.000455583	0.00296067	0.000221988		0.00123121	0.000448162	0.0016427	0.000763501		0.00106296	0.00106498	0.00151326	0.00158597		0.00649871	0.00214673	0.00101155	0.000424456			0.000915933	0.000915933	0.000201054	0.000201054
C13H18N+	188.143	2	3.54913e-05	7.09825e-05	2.14982e-05	4.29963e-05		0.000423061	0.000145569	0.000275918	7.16284e-05		0.000283104	4.9934e-05	0.000453755	0.000292074		0.000605187	0.000421719	0.000761396	0.000729114		0.00340374	0.000775927	0.000511124	9.35431e-05			0.000601182	0.000601182	0.000130037	0.000130037
C10H22NO2+	188.165	2	1.77382e-05	3.54763e-05	1.07458e-05	2.14916e-05		0.00204586	0.000130442	0.0014234	0.000105486		0.000121817	4.44829e-05	0.000159678	6.17993e-05		0.000335589	0.000335672	0.000475461	0.00049322		0.00287462	0.000830735	0.00044391	0.000158589			0.000260011	0.000260011	5.66086e-05	5.66086e-05
C3H9O9+	189.024	2	0.000128237	0.000256475	7.80429e-05	0.000156086		0.000521012	0.000103151	0.000353275	4.80787e-05		4.36895e-05	3.12958e-05	6.90522e-05	4.67587e-05		0.000184664	0.000152836	0.000249083	0.000255558		0.000618474	0.000331719	9.30482e-05	4.39718e-05			0.000768942	0.000768942	0.00015716	0.00015716
C7H9O6+	189.039	2	0.00229862	0.0013296	0.00201258	0.000727286		0.00658944	0.00160253	0.00427055	0.000702414		0.00224262	0.00100208	0.00296835	0.00143745		0.000964351	0.000509114	0.00112716	0.00100502		0.00144064	0.000467149	0.000226728	9.40778e-05			0.00556696	0.00556696	0.00113523	0.00113523
C11H9O3+	189.055	2	0.00197017	0.00394034	0.0011992	0.00239841		0.0281308	0.0046208	0.0189526	0.00193032		0.00700709	0.00358465	0.00829186	0.00202964		0.0041561	0.00420008	0.00600918	0.00645663		0.0103753	0.0034708	0.00164267	0.000693111			0.0116793	0.0116793	0.00242223	0.00242223
C8H13O5+	189.076	2	0.00223637	0.00447273	0.00136139	0.00272277		0.0486686	0.0091944	0.0327683	0.00406198		0.0146268	0.00573938	0.019977	0.0103104		0.00694851	0.00703642	0.010065	0.0108621		0.0150585	0.00521537	0.00242404	0.00113313			0.0259104	0.0259104	0.00535882	0.00535882
C12H13O2+	189.091	2	0.00153813	0.00307626	0.000936412	0.00187282		0.122632	0.0171284	0.0837708	0.00764155		0.0374622	0.0145452	0.0476184	0.0145417		0.0128412	0.0129382	0.0185176	0.019756		0.028249	0.0153841	0.00460639	0.00298052			0.0288764	0.0288764	0.00619539	0.00619539
C9H17O4+	189.112	2	0.000370046	0.000740092	0.000225309	0.000450618		0.0115515	0.00157592	0.00789345	0.00070036		0.00286946	0.000787169	0.00444353	0.00308345		0.00102317	0.0010388	0.00148529	0.00161128		0.00554486	0.00239227	0.000871287	0.000452553			0.00606756	0.00606756	0.00129513	0.00129513
C13H17O+	189.127	2	0.000834732	0.00166946	0.000508282	0.00101656		0.0522193	0.00603784	0.0365496	0.00364831		0.0263562	0.00626342	0.0388999	0.0229916		0.0108462	0.00263932	0.0110219	0.00854864		0.0223219	0.00729452	0.00348204	0.00126779			0.0254349	0.0254349	0.00556034	0.00556034
C10H21O3+	189.149	2	0.000446853	0.000893706	0.000272127	0.000544253		0.0216793	0.00201417	0.0150525	0.00115072		0.00161831	0.0011317	0.00193	0.001159		0.00153122	0.00155496	0.0022236	0.00241328		0.0145142	0.00517894	0.00219213	0.000773966			0.0130419	0.0130419	0.00283853	0.00283853
C14H21+	189.164	2	0.000584716	0.00042111	0.000601555	0.000569958		0.00281039	0.000471851	0.00174281	0.00025539		0.00131994	0.000427171	0.0019528	0.00102088		0.00242387	0.000893331	0.002644	0.00226089		0.0079023	0.00221699	0.00122728	0.000351291			0.00756884	0.00756884	0.00165085	0.00165085
C11H25O2+	189.185	2	0.000102388	0.000135343	8.38834e-05	8.61753e-05		0.000731188	0.00011648	0.000455406	6.00366e-05		2.61089e-05	4.31737e-05	2.55861e-05	3.32114e-05		0.000315123	2.00937e-05	0.00028459	0.000194235		0.00129479	0.000212903	0.000204374	5.53177e-05			0.00232131	0.00232131	0.000502726	0.000502726
C6H8NO6+	190.035	2	0.00182167	0.00132712	0.00147204	0.000749071		0.00313638	0.000590173	0.00206315	0.000230812		0.000663701	0.000367046	0.000814032	0.000289464		0.000982384	0.000983596	0.00141065	0.00147367		0.0031225	0.000750044	0.00048945	0.000142002			0.00148299	0.00148299	0.000307485	0.000307485
C7H12NO5+	190.071	2	0.00165099	0.00153909	0.0011537	0.000973983		0.00700072	0.00124104	0.00463125	0.000474484		0.000544321	0.000709588	0.000386619	0.000339541		0.000509192	0.000510698	0.000719602	0.000731071		0.00549323	0.00195895	0.000884242	0.000411696			0.0032681	0.0032681	0.000661195	0.000661195
C11H12NO2+	190.086	2	0.000293658	0.000587315	0.000179724	0.000359449		0.00960289	0.00180918	0.00664555	0.000912223		0.00418778	0.00101356	0.00606131	0.00321753		0.0049892	0.00504651	0.00725887	0.00781466		0.0116774	0.00435875	0.00183776	0.000833956			0.00356481	0.00356481	0.000764483	0.000764483
C8H16NO4+	190.107	2	0.000230028	0.000460056	0.000140798	0.000281595		0.0118182	0.00113109	0.00822918	0.0006176		0.00276502	0.0014073	0.00354474	0.00162828		0.00248955	0.0024961	0.00358657	0.00377012		0.0112324	0.00490444	0.0018123	0.000985674			0.00184805	0.00184805	0.000398229	0.000398229
C12H16NO+	190.123	2	5.36748e-05	0.00010735	3.28564e-05	6.57127e-05		0.00224549	0.000473059	0.00156135	0.000246892		0.00132052	0.000195559	0.00207601	0.00132401		0.00265221	0.00268409	0.00386118	0.00416151		0.00807878	0.00249012	0.00124783	0.000372215			0.00135305	0.00135305	0.000298564	0.000298564
C9H20NO3+	190.144	2	0.000145235	0.00029047	8.89137e-05	0.000177827		0.00196124	0.000190558	0.00130911	2.17024e-05		1.86377e-05	2.73333e-05	1.09518e-05	1.54887e-05		0.00104435	0.00104609	0.00150204	0.00157258		0.00330379	0.00140604	0.000538738	0.000281786			0.000421097	0.000421097	8.91128e-05	8.91128e-05
C10H7O4+	191.034	2	0.00180342	0.00136575	0.00143399	0.00075841		0.00271051	0.000467275	0.0018129	0.000180925		0.000602404	0.000456016	0.000582078	0.000378245		0.000762449	0.00077208	0.00111589	0.00120422		0.00177186	0.000692079	0.00027387	8.43486e-05			0.00205788	0.00205788	0.000421637	0.000421637
C7H11O6+	191.055	2	0.000586409	0.00117282	0.000360733	0.000721466		0.0225525	0.0038198	0.0157909	0.00200943		0.00660752	0.00107245	0.00996479	0.00529484		0.00306021	0.00162085	0.00365392	0.00338278		0.00842519	0.0036573	0.00134127	0.000675335			0.0134353	0.0134353	0.00279194	0.00279194
C11H11O3+	191.07	2	0.00323677	0.00647355	0.00199128	0.00398256		0.101045	0.0150361	0.0694949	0.00664635		0.0305687	0.0130598	0.0384336	0.0109433		0.0241843	0.0244384	0.0353398	0.0379646		0.0251213	0.0124956	0.00424336	0.00248945			0.0211405	0.0211405	0.00457509	0.00457509
C8H15O5+	191.091	2	0.000679979	0.00135996	0.000418373	0.000836746		0.0128017	0.00299104	0.00898769	0.00160926		0.00552993	0.00169411	0.00952676	0.0079004		0.0018608	0.0011707	0.00233235	0.00229961		0.00780239	0.00501568	0.00125003	0.000922615			0.0164923	0.0164923	0.00336676	0.00336676
C12H15O2+	191.107	2	0.000845066	0.00169013	0.000519988	0.00103998		0.0779738	0.00987553	0.0547687	0.00542313		0.0285232	0.00857266	0.0401945	0.020567		0.00996558	0.00935719	0.0141489	0.0147364		0.0199046	0.00974378	0.00329227	0.00191484			0.0205567	0.0205567	0.0044721	0.0044721
C9H19O4+	191.128	2	0.000304696	0.000609392	0.000187507	0.000375014		0.0109319	0.00131614	0.0076732	0.000720769		0.00166537	0.00090324	0.00204292	0.000710437		0.000938226	0.000876705	0.00132954	0.00141643		0.00320311	0.00130191	0.000501028	0.000233978			0.00367975	0.00367975	0.000798962	0.000798962
C13H19O+	191.143	2	0.00025551	0.00051102	0.000157251	0.000314502		0.0320132	0.0043889	0.0223071	0.00218507		0.0134583	0.00193971	0.0207674	0.0124727		0.0183531	0.0019469	0.015483	0.00893647		0.0279782	0.00725212	0.00442335	0.00122389			0.0164322	0.0164322	0.00364846	0.00364846
C10H23O3+	191.164	2	0.000160604	0.000321208	9.8853e-05	0.000197706		0.00331609	0.000209603	0.00238795	0.000239019		1.92377e-05	4.24205e-05	4.09126e-05	9.1031e-05		0.000393825	0.000458722	0.000125329	0.000131391		0.00572307	0.00273051	0.000863906	0.000381985			0.00291503	0.00291503	0.000645302	0.000645302
C14H23+	191.179	2	0.0002876	0.000306385	0.000280749	0.00029581		0.0039358	0.000433732	0.00257841	0.00013453		0.000720638	0.000302972	0.00109876	0.000573537		0.00359881	0.0013177	0.00393651	0.00329971		0.0114039	0.00305486	0.00181816	0.000530417			0.00668639	0.00668639	0.00149993	0.00149993
C7H14NO5+	192.087	2	0.000648287	0.00129657	0.000400962	0.000801924		0.00794056	0.00125615	0.00535778	0.000466678		0.000983703	0.00125826	0.000740129	0.000575013		0.00306133	0.00309762	0.00450246	0.00485099		0.00479942	0.00324133	0.000842266	0.000707201			0.00507869	0.00507869	0.00103084	0.00103084
C13H22N+	192.175	2	2.15645e-05	4.3129e-05	1.33437e-05	2.66874e-05		0.000363452	6.34625e-05	0.000247152	2.64852e-05		0.000107366	2.66465e-05	0.000152344	6.03868e-05		0.000542428	0.000454017	0.000733334	0.00073279		0.00337058	0.000849807	0.000530813	0.000113353			0.000487655	0.000487655	0.000107809	0.000107809
C6H9O7+	193.034	2	0.000841033	0.00075304	0.000614164	0.000477366		0.000906133	0.000387247	0.000604563	0.000202976		0.000632631	0.000246743	0.00116949	0.00100775		0.000541364	0.000186403	0.000590576	0.000533897		0.00175453	0.000789369	0.000274209	0.000112946			0.00226028	0.00226028	0.000466523	0.000466523
C10H9O4+	193.05	2	0.00144846	0.00289692	0.000900379	0.00180076		0.0175013	0.00246518	0.0119691	0.000899536		0.00532849	0.00335288	0.00598041	0.0010624		0.00500557	0.00502724	0.00734248	0.00776365		0.00463293	0.00185455	0.000779689	0.000406127			0.00708536	0.00708536	0.00149466	0.00149466
C7H13O6+	193.071	2	0.000754355	0.00150871	0.000468967	0.000937935		0.00733026	0.00192484	0.00515255	0.00102059		0.0024453	0.00125086	0.00475288	0.00456093		0.000840239	0.0005053	0.00104747	0.00101912		0.0100294	0.00691062	0.0016172	0.00119676			0.00877478	0.00877478	0.00184216	0.00184216
C11H13O3+	193.086	2	0.0028823	0.0057646	0.00179201	0.00358402		0.133646	0.0212904	0.092712	0.00956669		0.0475484	0.0221629	0.060684	0.0196985		0.0254608	0.0257188	0.0375873	0.0403457		0.0367559	0.0160476	0.00629518	0.00338104			0.0383663	0.0383663	0.00828063	0.00828063
C15H13+	193.101	2	0.00284986	0.00569971	0.00177198	0.00354396		0.0892671	0.0168768	0.0606148	0.00714817		0.0136234	0.00756442	0.0163468	0.0046918		0.00819497	0.00828414	0.0121069	0.0130169		0.0175117	0.00549898	0.00296237	0.0013235			0.111033	0.111033	0.0231576	0.0231576
C12H17O2+	193.122	2	0.000843138	0.00168628	0.000524302	0.0010486		0.0552282	0.00537367	0.0395551	0.00364374		0.0210273	0.00557572	0.0318137	0.0199537		0.00651927	0.00634127	0.00946915	0.0099547		0.0166924	0.00615761	0.00278296	0.00129286			0.0266948	0.0266948	0.00575165	0.00575165
C9H21O4+	193.143	2	5.50988e-05	0.000110198	3.42668e-05	6.85336e-05		0.00232588	6.46533e-05	0.00171445	0.000195722		1.60133e-05	2.2716e-05	2.4172e-05	4.06713e-05		0.00039619	0.000402609	0.000587843	0.000638822		0.00223114	0.000631512	0.000360101	0.000120783			0.00265787	0.00265787	0.000571289	0.000571289
C13H21O+	193.159	2	0.000132697	0.000265394	8.25329e-05	0.000165066		0.00496666	0.000646693	0.00341417	0.000233875		0.00225287	0.000399231	0.00360154	0.00228642		0.00340638	0.000269151	0.00322144	0.00222814		0.00700243	0.00183799	0.00112685	0.000269455			0.00313255	0.00313255	0.000712993	0.000712993
C14H25+	193.195	2	0.000108714	0.000139446	9.88455e-05	0.000109862		0.00207819	0.000361084	0.00144037	0.000247646		0.000105025	8.268e-05	0.000152306	0.000137594		0.00103006	0.000520444	0.0012288	0.00112651		0.00402257	0.00103778	0.000655066	0.000184159			0.00258176	0.00258176	0.000605363	0.000605363
C6H12NO6+	194.066	2	0.000251921	0.000503843	0.000157426	0.000314852		0.00217317	0.000403841	0.00147752	0.000167373		0.000127671	0.00010424	0.000127725	0.000116289		0.000878974	0.000881195	0.00129257	0.00135819		0.00424082	0.00164193	0.0006856	0.000265163			0.0018229	0.0018229	0.000379216	0.000379216
C10H12NO3+	194.081	2	0.000419351	0.000838701	0.000262073	0.000524147		0.00549921	0.000853721	0.00387107	0.000415933		0.00399787	0.0017448	0.00572749	0.00351141		0.00327796	0.00331817	0.00487302	0.00525476		0.00969364	0.00315221	0.00165162	0.000720245			0.00195603	0.00195603	0.000437618	0.000437618
C14H12N+	194.096	2	5.76878e-05	0.000115376	3.60549e-05	7.21097e-05		0.006821	0.00126866	0.00466104	0.000538294		0.0092716	0.00898355	0.00979489	0.00447154		0.00438843	0.00440563	0.00646862	0.00683073		0.00970901	0.00315328	0.00163069	0.000701939			0.0065582	0.0065582	0.00140916	0.00140916
C12H20NO+	194.154	2	0.000135433	0.000270865	8.46706e-05	0.000169341		0.0017119	0.000277679	0.00120675	0.000137501		0.000515992	0.000236705	0.000969817	0.000772337		0.00152018	0.00152022	0.00221446	0.00228135		0.00969695	0.00214453	0.00156839	0.000324013			0.00103394	0.00103394	0.000228987	0.000228987
C13H24N+	194.19	2	2.5895e-05	5.179e-05	1.61922e-05	3.23845e-05		0.000219814	1.94449e-05	0.000150766	1.68062e-06		3.01462e-05	2.24185e-05	4.57496e-05	3.49133e-05		0.000351737	0.000355163	0.000522066	0.000559883		0.00317879	0.000541141	0.000517637	9.75143e-05			0.000385864	0.000385864	8.77436e-05	8.77436e-05
C6H11O7+	195.05	2	0.000450775	0.00090155	0.000283126	0.000566251		0.00275937	0.000972436	0.00192211	0.000517767		0.00203965	0.00103688	0.0039109	0.00389366		0.000653188	0.000298692	0.000770005	0.000715826		0.00467923	0.00272315	0.000773175	0.000498375			0.00552349	0.00552349	0.00117743	0.00117743
C10H11O4	195.066	2	0.00108286	0.00216572	0.000680184	0.00136037		0.0320209	0.00536271	0.0221793	0.00227121		0.00891678	0.00497021	0.010613	0.00221637		0.00342545	0.00325425	0.00499333	0.00524719		0.00572419	0.00216572	0.000990962	0.000482879			0.00888941	0.00888941	0.00197064	0.00197064
C7H15O6+	195.086	2	0.00125704	0.00251408	0.000789678	0.00157936		0.0198543	0.00468212	0.0140595	0.00245291		0.0114883	0.00621954	0.0221332	0.0230154		0.00268025	0.00228695	0.00377389	0.00396363		0.0147167	0.00938456	0.00245441	0.00179044			0.0226473	0.0226473	0.00497596	0.00497596
C11H15O3+	195.102	2	0	0	0	0		0.0969479	0.0166964	0.06775	0.00761283		0.128691	0.105106	0.150228	0.0720847		0.0190945	0.0133628	0.0248638	0.0235244		0.0254654	0.0131314	0.00434594	0.00267841			0.0496223	0.0496223	0.0113486	0.0113486
C15H15+	195.117	2	3.4799e-05	6.95981e-05	2.18643e-05	4.37287e-05		0.0738797	0.00865158	0.0526561	0.00449688		0.0111487	0.0106847	0.0100279	0.00552079		0.00426159	0.0042828	0.00632381	0.00669974		0.0169535	0.0070645	0.0028545	0.00148177			0.0646077	0.0646077	0.0148012	0.0148012
C12H19O2+	195.138	2	0.000200779	0.000401558	0.000126164	0.000252327		0.0151006	0.00156302	0.0109023	0.00100689		0.00650091	0.00202804	0.0100937	0.00699576		0.00269492	0.00197215	0.00359241	0.00352722		0.0064405	0.00178189	0.00107392	0.000375642			0.00833383	0.00833383	0.0018865	0.0018865
C13H23O+	195.174	2	0.000100036	0.000200071	6.28712e-05	0.000125742		0.00200615	0.0001939	0.00137155	2.03892e-05		0.000146212	9.49246e-05	0.000260312	0.000210173		0.00103596	0.00101	0.00151962	0.00159108		0.0030589	0.000619683	0.00050272	9.60813e-05			0.00199782	0.00199782	0.000454104	0.000454104
C8H6NO5+	196.024	2	9.39332e-05	0.000170454	5.95841e-05	0.0001075		0.00063186	0.000100255	0.00043755	3.97129e-05		0.000359912	0.000161635	0.000440529	0.000107811		0.000511237	0.000360679	0.000673006	0.00064691		0.00115686	0.000329542	0.000188381	5.14418e-05			0.00036746	0.00036746	7.67265e-05	7.67265e-05
C5H10NO7+	196.045	2	0.000639751	0.000670324	0.000442286	0.00043253		0.00127558	0.000278428	0.000868185	0.000123338		7.24945e-06	1.62103e-05	9.27008e-06	2.07285e-05		0.000127079	5.87457e-05	0.000139554	0.000140805		0.00182934	0.000543346	0.000302199	9.77116e-05			0.000675365	0.000675365	0.000148055	0.000148055
C9H10NO4+	196.06	2	0.000462593	0.000925186	0.000292061	0.000584122		0.00435122	0.000776037	0.00300471	0.000325415		0.00282252	0.00154112	0.00383216	0.00208284		0.00305315	0.00310691	0.00460329	0.00501549		0.00509381	0.000744045	0.000862935	0.000224776			0.00380652	0.00380652	0.000766031	0.000766031
C6H14NO6+	196.082	2	0.000450144	0.000900288	0.000284232	0.000568464		0.00736107	0.000975783	0.0052442	0.000476968		0.000393009	0.000310291	0.000485011	0.00046086		0.00428976	0.00432445	0.00641939	0.00685771		0.012523	0.00835364	0.00214102	0.00164402			0.00941995	0.00941995	0.00195133	0.00195133
C10H14NO3+	196.097	2	6.75028e-05	0.000135006	4.26263e-05	8.52525e-05		0.00824798	0.00130085	0.00582287	0.000601791		0.00419222	0.00201805	0.00587687	0.00340934		0.00218839	0.00219802	0.00326132	0.00344916		0.0115007	0.00884513	0.00206324	0.00177594			0.00211847	0.00211847	0.0004781	0.0004781
C14H14N+	196.112	2	0	0	0	0		0.00201714	0.00032322	0.00143019	0.000155692		0.000286032	0.000340556	0.000234684	0.000173639		0.00155304	0.00156888	0.00232899	0.00250031		0.00656017	0.00306282	0.00108953	0.000547409			0.00129979	0.00129979	0.000282364	0.000282364
C11H18NO2+	196.133	2	0.00025353	0.000507061	0.000160128	0.000320256		0.00672467	0.000796841	0.00472054	0.000297563		0.00429988	0.00108575	0.00646965	0.00363151		0.0060797	0.00331948	0.0075137	0.00700993		0.0327551	0.00686499	0.00550835	0.0014644			0.00174368	0.00174368	0.000392898	0.000392898
C12H22NO+	196.17	2	5.51391e-05	0.000110278	3.48319e-05	6.96638e-05		0.000930995	0.00018899	0.00063516	8.10767e-05		4.98488e-05	3.67769e-05	7.40002e-05	6.29632e-05		0.000734332	0.000736439	0.00107141	0.0010887		0.00575642	0.00083457	0.000972388	0.00023172			0.000694685	0.000694685	0.000157844	0.000157844
C13H26N+	196.206	2	5.02438e-06	1.00488e-05	3.17455e-06	6.34909e-06		0.000240313	4.75832e-05	0.000159566	1.92047e-05		6.15431e-06	1.13708e-05	8.36437e-06	1.45773e-05		0.000355499	0.000196423	0.000438024	0.000410296		0.00278898	0.00042425	0.000467352	9.85957e-05			0.000415649	0.000415649	9.41058e-05	9.41058e-05
C9H9O5+	197.044	2	0.00133612	0.00267224	0.000847825	0.00169565		0.0120685	0.00223868	0.00829842	0.000925094		0.00471778	0.00308767	0.0055303	0.00129656		0.00210174	0.00212317	0.00316688	0.0033998		0.0044732	0.000745326	0.000758839	0.000175864			0.0126688	0.0126688	0.00264607	0.00264607
C6H13O7+	197.066	2	0.00312953	0.00625906	0.00198603	0.00397206		0.0180619	0.00377824	0.0125072	0.00171046		0.00351776	0.00147087	0.00652289	0.00560543		0.00510534	0.00425896	0.00719981	0.00740134		0.0138519	0.00481084	0.00235642	0.000898249			0.0322596	0.0322596	0.00669605	0.00669605
C10H13O4+	197.081	2	0.00280965	0.0056193	0.00178317	0.00356634		0.0968614	0.0163717	0.0682036	0.00735037		0.0505882	0.0292529	0.0663617	0.030321		0.0249038	0.025218	0.0376077	0.0405833		0.0256153	0.00936087	0.00455266	0.00221497			0.0389175	0.0389175	0.00862583	0.00862583
C14H13O+	197.096	2	0.00087305	0.0017461	0.000554132	0.00110826		0.0508675	0.00368946	0.0371499	0.0029664		0.00275294	0.00220015	0.00263993	0.00192766		0.00632832	0.0063618	0.0094901	0.0100635		0.0136232	0.0037156	0.00236233	0.00089745			0.0514386	0.0514386	0.0117674	0.0117674
C11H17O3+	197.117	2	0	0	0	0		0.0543177	0.0092414	0.0384493	0.00431573		0.0392391	0.0264782	0.0483679	0.0208415		0.00576583	0.00579268	0.00864057	0.0091454		0.0142132	0.00720369	0.00250558	0.0015288			0.0212316	0.0212316	0.0047915	0.0047915
C15H17+	197.132	2	0	0	0	0		0.0184866	0.00168447	0.0136172	0.00134351		0.00449782	0.00133149	0.00626015	0.0023241		0.00148516	0.00149113	0.00222389	0.00234914		0.00660845	0.00200571	0.00111977	0.000394062			0.0137999	0.0137999	0.00320323	0.00320323
C12H21O2+	197.154	2	0.00010318	0.000206361	6.55087e-05	0.000131017		0.00610812	0.000623389	0.00437648	0.000299537		0.00097047	0.000155927	0.00141955	0.000564368		0.00102744	0.000531178	0.00125883	0.00115895		0.00293707	0.000576058	0.000498096	0.000127055			0.00355098	0.00355098	0.000810959	0.000810959
C13H25O+	197.19	2	9.94995e-05	0.000198999	6.31834e-05	0.000126367		0.00178772	0.000300887	0.00118297	0.000111951		0.000155728	0.000134277	0.000236317	0.000216428		0.00245492	0.000255041	0.00211917	0.00120133		0.00411421	0.000639883	0.000683796	6.68722e-05			0.00337193	0.00337193	0.000763485	0.000763485
C14H29+	197.226	2	2.66745e-05	5.3349e-05	1.69418e-05	3.38836e-05		0.00141981	0.000229163	0.000943674	0.000137712		0.000161382	0.000109669	0.000240132	0.000147014		0.0014563	0.00050174	0.0016344	0.00136271		0.00598014	0.00135829	0.00100359	0.000212056			0.00545184	0.00545184	0.00125372	0.00125372
C4H8NO8+	198.024	2	6.56825e-05	0.000131365	4.18866e-05	8.37732e-05		0.000220108	2.5265e-05	0.000165018	2.06289e-05		0.000112314	4.93706e-05	0.000178822	9.95954e-05		0.000271657	0.000272529	0.000399896	0.000406047		0.000721948	0.00018726	0.000120687	2.37885e-05			0.000224335	0.000224335	4.81491e-05	4.81491e-05
C8H8NO5+	198.04	2	0.000299246	0.000408152	0.000194627	0.000261935		0.00116468	0.000195306	0.000838325	9.9884e-05		0.00098605	0.000518282	0.00135966	0.000769385		0.000647541	0.000367832	0.000818192	0.000794065		0.00176911	0.000446058	0.000299437	6.99079e-05			0.00012674	0.00012674	3.18089e-05	3.18089e-05
C5H12NO7+	198.061	2	0.000703643	0.00140729	0.000448806	0.000897612		0.00452624	0.000831747	0.00313763	0.000347757		0.00127871	0.00059564	0.00167384	0.000562118		0.00340928	0.00344211	0.00516109	0.00553358		0.00519253	0.00139435	0.000880811	0.000282536			0.00475854	0.00475854	0.000996032	0.000996032
C9H12NO4+	198.076	2	0.000522916	0.00104583	0.000333558	0.000667116		0.00678866	0.00110804	0.0047673	0.000464114		0.00316351	0.00165095	0.00421809	0.00189937		0.00241904	0.00243619	0.00365323	0.00389294		0.0047966	0.00267508	0.000861981	0.000582939			0.00212712	0.00212712	0.000464052	0.000464052
C13H12NO+	198.091	2	3.42059e-05	6.84117e-05	2.1821e-05	4.36419e-05		0.0057608	0.00128738	0.00418714	0.000712395		0.00188921	0.000427506	0.0029525	0.00177152		0.00562718	0.00564969	0.00846715	0.0089435		0.0386044	0.0443249	0.00699143	0.008867			0.00936863	0.00936863	0.0020421	0.0020421
C10H16NO3+	198.112	2	0	0	0	0		0.0197775	0.00403223	0.0138421	0.00185249		0.00452078	0.00263225	0.00566577	0.00167601		0.00308904	0.00313026	0.00469202	0.00507074		0.0364694	0.0489012	0.00681436	0.00973626			0.000665936	0.000665936	0.00015132	0.00015132
C14H16N+	198.128	2	0	0	0	0		0.00237043	0.000364041	0.00165381	0.000138501		7.49515e-06	1.67597e-05	1.35164e-05	3.02236e-05		0.000725669	0.000728447	0.00109184	0.00115261		0.0051258	0.00516717	0.000928284	0.00104586			0.000812179	0.000812179	0.000187742	0.000187742
C11H20NO2+	198.149	2	0	0	0	0		0.00282197	0.000329058	0.00207912	0.000219374		0.000952438	0.000238775	0.00146971	0.000872698		0.00110672	0.000917807	0.00154366	0.00153318		0.00972795	0.00475986	0.0016943	0.00100142			0.000904626	0.000904626	0.000211196	0.000211196
C12H24NO+	198.185	2	3.47307e-05	6.94613e-05	2.21663e-05	4.43326e-05		0.000397865	4.48561e-05	0.00027829	1.1642e-05		1.50033e-05	1.59867e-05	2.91572e-05	3.3994e-05		0.00121432	0.00113312	0.00173866	0.00174176		0.00588088	0.000928323	0.00101945	0.000268886			0.000665987	0.000665987	0.000159741	0.000159741
C13H28N+	198.222	2	1.47353e-05	2.94707e-05	9.40633e-06	1.88127e-05		0.000143156	1.85928e-05	0.000100419	6.32937e-06		1.86841e-05	1.29128e-05	2.84423e-05	1.64626e-05		0.000169727	0.000155379	0.000248035	0.000258937		0.0024955	0.000466021	0.000428608	0.000109425			0.000459908	0.000459908	0.000107569	0.000107569
C8H7O6+	199.024	2	0.000345321	0.000422961	0.000228464	0.000280188		0.000118274	5.55392e-05	0.000105531	4.4274e-05		0.000633892	0.000431324	0.000708868	0.000154677		0.000780578	0.000781646	0.00028291	0.000292433		0.00106135	0.000185994	0.000180429	3.01054e-05			0.000820974	0.000820974	0.000176107	0.000176107
C12H7O3+	199.039	2	0.00191764	0.00218077	0.00130064	0.00141027		0.00250122	0.000224058	0.00174675	1.57577e-05		0.000565178	0.000147486	0.00100333	0.000773769		0.00180232	0.00181867	0.00274055	0.00293458		0.00207819	0.000608125	0.000358669	0.000117845			0.00277707	0.00277707	0.000596103	0.000596103
C9H11O5+	199.06	2	0.00133794	0.00192618	0.000871982	0.00123815		0.0142272	0.00275702	0.00991379	0.00119626		0.00783729	0.00427666	0.0104382	0.00478406		0.00253968	0.00121499	0.00308283	0.00281101		0.00372934	0.000700193	0.000637615	0.000114873			0.00791809	0.00791809	0.00172598	0.00172598
C13H11O2+	199.075	2	0.00191222	0.00382445	0.00122596	0.00245191		0.0242326	0.00394555	0.0170431	0.00161609		0.00658572	0.00339482	0.00825551	0.00204336		0.00880408	0.00889623	0.0134065	0.0144011		0.00992532	0.00444511	0.00180011	0.00102661			0.0140236	0.0140236	0.0030222	0.0030222
C10H15O4+	199.096	2	0.000328194	0.000656387	0.000210432	0.000420865		0.02845	0.00509376	0.0202008	0.00233688		0.0104179	0.00552519	0.0139065	0.00579668		0.0026001	0.0026401	0.0039751	0.00431317		0.00696259	0.00329969	0.00124609	0.000732176			0.00905909	0.00905909	0.00202259	0.00202259
C14H15O+	199.112	2	0.00128413	0.00256826	0.000823426	0.00164685		0.0554164	0.00734436	0.0398121	0.00333596		0.0123557	0.00529336	0.0163572	0.00509093		0.0104282	0.0104851	0.0158023	0.016765		0.0155369	0.00510653	0.00277164	0.00116005			0.0187658	0.0187658	0.00420969	0.00420969
C11H19O3+	199.133	2	0.000345697	0.000691395	0.000221696	0.000443392		0.0104955	0.00130533	0.00759872	0.000648028		0.00368658	0.000961046	0.00577736	0.0035949		0.00132258	0.00136768	0.00204433	0.00228656		0.00520203	0.00113525	0.000873112	0.000118535			0.00667096	0.00667096	0.00152453	0.00152453
C15H19+	199.148	2	7.46041e-05	0.000149208	4.78474e-05	9.56948e-05		0.00958516	0.00119999	0.00727584	0.000998461		0.00317484	0.000619246	0.00495702	0.00243006		0.00196911	0.000945239	0.00237544	0.00209968		0.00821466	0.00245836	0.00139987	0.000367306			0.0130293	0.0130293	0.00310554	0.00310554
C12H23O2+	199.169	2	5.9747e-05	0.000119494	3.83229e-05	7.66458e-05		0.00544392	0.000801744	0.00377816	0.000271002		0.000791055	0.000191995	0.00111441	0.000368273		0.00124747	0.00110258	0.00181079	0.00187194		0.00282151	0.000448121	0.000479178	5.4381e-05			0.00357614	0.00357614	0.000835721	0.000835721
C13H27O+	199.206	2	9.41847e-05	3.8908e-05	9.16046e-05	3.90199e-05		0.000494615	3.80669e-05	0.000354313	1.21343e-05		0.000127773	8.72279e-05	0.000144691	6.21261e-05		0.000233593	0.000104962	0.000170862	6.46141e-05		0.000905381	0.000336633	0.000159244	6.5025e-05			0.000164449	0.000164449	3.65227e-05	3.65227e-05
C7H6NO6+	200.019	2	1.33684e-05	2.67369e-05	8.61154e-06	1.72231e-05		0.000592791	0.000134077	0.000417322	6.39342e-05		0.000318865	0.000142678	0.000427022	0.000153566		0.000353988	0.00036269	0.000546886	0.000602973		0.00112553	0.000258208	0.000194818	5.41035e-05			0.000446725	0.000446725	9.86842e-05	9.86842e-05
C11H6NO3+	200.034	2	8.78532e-05	0.000175706	5.65967e-05	0.000113193		0.000143486	2.47288e-05	0.000103316	1.1962e-05		0.000212357	7.39134e-05	0.000298598	0.000125227		0.000444285	0.00036306	0.000631801	0.000654575		0.00114159	0.000316223	0.000195974	5.0014e-05			5.01513e-05	5.01513e-05	1.20851e-05	1.20851e-05
C8H10NO5+	200.055	2	0.00337489	0.00183643	0.00304134	0.00100555		0.00444572	0.00103703	0.00305376	0.00047321		0.00222058	0.00131396	0.00285729	0.00114963		0.00172553	0.00174139	0.00263754	0.00282502		0.00340955	0.000581559	0.000605905	0.000180035			0.0020286	0.0020286	0.000437688	0.000437688
C9H14NO4+	200.092	2	7.38193e-05	0.000147639	4.75696e-05	9.51391e-05		0.00368597	0.000579562	0.00265285	0.000270976		0.00104765	0.000581594	0.00136374	0.000512988		0.00102193	0.00102759	0.00155638	0.00165155		0.00398856	0.00255766	0.000735871	0.000536989			0.00053806	0.00053806	0.000120791	0.000120791
C10H18NO3+	200.128	2	0.000441055	0.00088211	0.00028427	0.00056854		0.00763571	0.000829384	0.00545873	0.000280117		0.00172554	0.00114621	0.00217215	0.000955907		0.0065111	0.00656488	0.00994728	0.0106309		0.018484	0.0216418	0.00359016	0.0046436			0.00084964	0.00084964	0.000191108	0.000191108
C11H22NO2+	200.165	2	7.18622e-05	0.000143724	4.63253e-05	9.26506e-05		0.00106562	0.000136356	0.000762524	5.37617e-05		0.000209807	7.29064e-05	0.000294068	0.000118345		0.000530859	0.000538284	0.000815129	0.000882053		0.00384728	0.000891294	0.000678399	0.000199059			0.000363506	0.000363506	8.40579e-05	8.40579e-05
C12H26NO+	200.201	2	1.89458e-05	3.78915e-05	1.22154e-05	2.44309e-05		0.000361532	8.02822e-05	0.000246107	3.53697e-05		5.41491e-05	2.38492e-05	8.97952e-05	6.09347e-05		0.000496771	0.000176863	0.000564204	0.000481495		0.00277642	0.000464182	0.000480714	9.42827e-05			0.000656779	0.000656779	0.000150958	0.000150958
C15H5O+	201.033	2	0.000521008	0.000393387	0.000467722	0.000233339		6.70057e-05	7.71041e-05	4.03429e-05	4.53008e-05		0.000180259	0.00012508	0.000392753	0.000377369		0.000254511	0.000282226	0.000407729	0.000495719		0.00170811	0.00120041	0.000287766	0.000183209			0.00176473	0.00176473	0.000378805	0.000378805
C8H9O6+	201.039	2	0.00254109	0.00145319	0.00240318	0.000942866		0.0047459	0.000979583	0.00326906	0.000420003		0.00192296	0.0011811	0.00246315	0.000988649		0.00124226	9.84107e-05	0.00119165	0.000777139		0.000754658	0.00058484	0.000137859	0.000107284			0.00289806	0.00289806	0.000622142	0.000622142
C12H9O3+	201.055	2	0.00110366	0.00220732	0.000714645	0.00142929		0.00398662	0.000423595	0.00277017	8.95519e-05		0.00183564	0.00106716	0.00219194	0.000931127		0.00402982	0.00410283	0.00623351	0.00679794		0.00483748	0.00159198	0.000873825	0.000411814			0.00283151	0.00283151	0.000613425	0.000613425
C9H13O5+	201.076	2	0.00158741	0.00317483	0.00102799	0.00205599		0.0410965	0.00701964	0.029459	0.00317836		0.0183571	0.0088311	0.0257931	0.0132294		0.00582737	0.00589472	0.00897161	0.00966		0.0115243	0.00303933	0.00206422	0.000768717			0.01517	0.01517	0.00338459	0.00338459
C13H13O2+	201.091	2	0.00560275	0.0112055	0.00362856	0.00725712		0.109739	0.0154266	0.0792373	0.00681989		0.0358788	0.0173852	0.0458792	0.0111957		0.0220471	0.0222518	0.0338782	0.0362944		0.0296629	0.011964	0.00548178	0.00274915			0.0313598	0.0313598	0.00708689	0.00708689
C10H17O4+	201.112	2	0.000205119	0.000410238	0.000132857	0.000265715		0.0163316	0.0029615	0.0118312	0.00146705		0.0102697	0.00442477	0.0148411	0.00824319		0.00174317	0.000608054	0.00199894	0.00166843		0.00278607	0.00083332	0.000495707	0.000195204			0.00696015	0.00696015	0.00157633	0.00157633
C14H17O+	201.127	2	0.00073324	0.00146648	0.000474962	0.000949923		0.0497009	0.00639893	0.0363817	0.00326282		0.0141582	0.00497792	0.0200015	0.00827326		0.0082241	0.00828836	0.0126218	0.0134745		0.017546	0.00524083	0.00316354	0.00118456			0.017495	0.017495	0.0040218	0.0040218
C11H21O3+	201.149	2	0.000264077	0.000528154	0.000171076	0.000342152		0.00963934	0.00121467	0.00707748	0.000642505		0.00206738	0.00065317	0.00325731	0.00207549		0.00134215	0.00134283	0.00203593	0.00211703		0.00685932	0.00206765	0.00117378	0.000325245			0.00533518	0.00533518	0.00122256	0.00122256
C15H21+	201.164	2	0.000131373	0.000193168	0.000117066	0.000144594		0.00380072	0.000688678	0.00265	0.000278534		0.00141479	0.000349437	0.00216517	0.00103326		0.00162833	0.000990754	0.00212322	0.00202225		0.00602349	0.00196054	0.00105068	0.000307167			0.00320762	0.00320762	0.000750239	0.000750239
C12H25O2+	201.185	2	6.54853e-05	0.000130971	4.24308e-05	8.48615e-05		0.00203555	0.000388048	0.00141702	0.000161807		0.000112104	7.22712e-05	0.000144359	9.52536e-05		0.000466266	0.000332896	0.00063451	0.0006137		0.00127432	0.000212867	0.000226283	5.57571e-05			0.0013894	0.0013894	0.00032012	0.00032012
C7H8NO6+	202.035	2	0.000524777	0.000483391	0.000394334	0.000339126		0.00295814	0.000553973	0.00212245	0.000256441		0.000875326	0.000507755	0.00111097	0.000336493		0.000641003	0.000385185	0.000838573	0.000813516		0.0013296	0.000471732	0.000242059	0.000106715			0.000855113	0.000855113	0.000187462	0.000187462
C11H8NO3+	202.05	2	0.000169064	0.000338128	0.000110017	0.000220034		0.0010973	0.000227816	0.000817728	0.000131599		0.000446492	7.8393e-05	0.000733482	0.000449865		0.0012109	0.00121916	0.00186503	0.00198599		0.00343365	0.00153965	0.000599317	0.000251578			0.000476393	0.000476393	0.000111776	0.000111776
C8H12NO5+	202.071	2	0.00283914	0.00303453	0.00199542	0.00199323		0.00767613	0.00145404	0.00544731	0.000640836		0.0032763	0.00169638	0.00437316	0.00176373		0.00277766	0.00279492	0.00427577	0.00454586		0.00575923	0.000932053	0.00104891	0.00032844			0.00588198	0.00588198	0.00122404	0.00122404
C12H12NO2+	202.086	2	0.0010527	0.0021054	0.000685161	0.00137032		0.00525272	0.000987383	0.00365859	0.000405253		0.000875837	0.000499766	0.00109073	0.000307245		0.00311749	0.00321559	0.00488424	0.00544224		0.00584749	0.00105973	0.00106351	0.000336925			0.00437783	0.00437783	0.000919037	0.000919037
C9H16NO4+	202.107	2	0.000209134	0.000418268	0.000136131	0.000272263		0.00416471	0.000700882	0.00296343	0.000291084		0.000608087	0.000518272	0.000670358	0.000175646		0.000858071	0.000883908	0.00134357	0.00149407		0.00413955	0.00192115	0.000771717	0.000443057			0.000816849	0.000816849	0.000179145	0.000179145
C13H16NO+	202.123	2	7.07641e-05	0.000141528	4.60659e-05	9.21318e-05		0.00299315	0.000407134	0.00222278	0.000232928		0.00115417	0.000233883	0.0017709	0.00090566		0.0029014	0.00293007	0.00448379	0.00481016		0.00716051	0.00278575	0.0012839	0.000613003			0.00118924	0.00118924	0.000271712	0.000271712
C10H20NO3+	202.144	2	4.25092e-05	8.50183e-05	2.76754e-05	5.53509e-05		0.00354957	0.000368665	0.00259455	0.000163273		0.000556266	0.000230835	0.000808485	0.000432999		0.00072711	0.000753425	0.00114212	0.00128123		0.0039662	0.00111069	0.000721145	0.000282973			0.000605531	0.000605531	0.000141043	0.000141043
C14H20N+	202.159	2	1.60974e-05	3.21949e-05	1.0481e-05	2.09619e-05		0.000657678	0.000152171	0.000470553	7.51982e-05		0.000229424	4.15474e-05	0.000380801	0.000205171		0.00072623	0.0006472	0.00105041	0.00104291		0.00347996	0.000871287	0.00060108	0.000111781			0.000478694	0.000478694	0.00011141	0.00011141
C11H24NO2+	202.18	2	2.48375e-06	4.96751e-06	1.61733e-06	3.23466e-06		0.000762611	0.000118336	0.000530414	4.07505e-05		7.10009e-05	3.66285e-05	8.99265e-05	2.21745e-05		0.000470685	0.000478143	0.000731036	0.000793901		0.00378579	0.000670891	0.000671983	0.000152678			0.000254734	0.000254734	5.83849e-05	5.83849e-05
C8H11O6+	203.055	2	0.0072107	0.00540395	0.00632373	0.0033557		0.0170347	0.00410635	0.0117489	0.0019066		0.00560542	0.00327647	0.00779158	0.00446386		0.00331429	0.0022689	0.00449278	0.00441375		0.0048979	0.00121825	0.000871512	0.000203391			0.0109567	0.0109567	0.00239121	0.00239121
C9H15O5+	203.091	2	0.00172454	0.00344907	0.00112804	0.00225609		0.00620145	0.000928167	0.00424993	0.000325586		0.000188902	0.00026617	0.000487634	0.000675101		0.000194509	0.000215524	0.000314736	0.000382353		0.00520492	0.00240466	0.000952781	0.000496198			0.0320182	0.0320182	0.00661278	0.00661278
C10H19O4+	203.128	2	0.00056467	0.00112934	0.000369425	0.00073885		0.00763447	0.0012705	0.00567656	0.000702524		0.00321195	0.000659223	0.00547485	0.00380052		0.0018728	0.00189939	0.00291891	0.0031599		0.00407011	0.000727696	0.000743388	0.000224392			0.00500595	0.00500595	0.00111759	0.00111759
C14H19O+	203.143	2	0.000345401	0.000690803	0.00022599	0.000451979		0.0313948	0.00403722	0.0233787	0.00227161		0.010208	0.00276199	0.015723	0.00869943		0.00348125	0.00340023	0.00528848	0.00546109		0.0117585	0.00409774	0.00212436	0.000818742			0.0116248	0.0116248	0.00274546	0.00274546
C12H27O2+	203.201	2	5.5582e-05	0.000111164	3.63766e-05	7.27532e-05		0.00150352	0.000256621	0.00101735	0.000102941		0.00013273	8.61641e-05	0.000176569	0.000132179		0.000538437	0.000293297	0.000689259	0.000653838		0.00205482	0.000409619	0.000372483	0.000100671			0.00155694	0.00155694	0.000358779	0.000358779
C7H10NO6+	204.05	2	0.000742353	0.000774114	0.000531277	0.000511495		0.00375179	0.000658351	0.00268905	0.000280035		0.00113238	0.000675384	0.0014557	0.000496237		0.00217248	0.00219736	0.0033941	0.00365368		0.00401862	0.000760623	0.000743174	0.000229182			0.00153221	0.00153221	0.000338204	0.000338204
C8H14NO5+	204.087	2	0.000713791	0.00142758	0.0004692	0.000938401		0.0132263	0.00203444	0.00959956	0.00086762		0.00254516	0.00190402	0.00301645	0.000904155		0.00166312	0.00166354	0.00254229	0.00261022		0.00924311	0.00543526	0.00177856	0.0012354			0.0111686	0.0111686	0.00232485	0.00232485
C12H14NO2+	204.102	2	0.000465142	0.000930283	0.000305777	0.000611554		0.00634037	0.00111829	0.00461654	0.000523355		0.00202895	0.000608608	0.00299922	0.00129824		0.00384046	0.00389244	0.00601151	0.00649923		0.00800946	0.00268732	0.00148124	0.000643572			0.00398721	0.00398721	0.000862084	0.000862084
C9H18NO4+	204.123	2	8.79031e-05	0.000175806	5.77921e-05	0.000115584		0.00208221	0.000252146	0.00151794	9.5513e-05		4.25609e-06	8.56936e-06	2.31536e-06	4.42935e-06		0.000701162	0.000701417	0.00107876	0.00112039		0.0039289	0.0016562	0.000734086	0.000391339			0.00100327	0.00100327	0.000217878	0.000217878
C13H18NO+	204.138	2	0	0	0	0		0.00198255	0.00024928	0.00148311	0.000140601		0.000693536	0.000152914	0.00109011	0.000602215		0.00164186	0.00166757	0.0025745	0.0027949		0.00456705	0.00152831	0.000825375	0.000312498			0.000678904	0.000678904	0.000160838	0.000160838
C10H22NO3+	204.159	2	4.43546e-05	8.87092e-05	2.91663e-05	5.83326e-05		0.00145661	0.000123729	0.00106183	2.90135e-05		0	0	0	0		0.000620755	0.00062333	0.000962998	0.00101766		0.00289591	0.000651092	0.00053337	0.000161296			0.000298767	0.000298767	6.96875e-05	6.96875e-05
C14H22N+	204.175	2	3.84078e-05	7.68155e-05	2.52577e-05	5.05154e-05		0.000184032	0.000107151	0.000140726	6.51801e-05		0.000130723	3.78445e-05	0.000229381	0.000158824		0.000195447	0.000198944	0.000306996	0.000334659		0.00137441	0.000920405	0.000233734	0.000153422			0.000173474	0.000173474	3.89941e-05	3.89941e-05
C11H9O4+	205.05	2	0.00621186	0.0058085	0.00471066	0.0037673		0.00955729	0.00196773	0.006837	0.000897397		0.00299473	0.00158741	0.00386675	0.000992162		0.00149137	0.000541082	0.0017172	0.00156602		0.0207281	0.02401	0.00339255	0.00367586			0.0103283	0.0103283	0.00227865	0.00227865
C8H13O6+	205.071	2	0.0686689	0.029039	0.0679689	0.0208353		0.0768793	0.0104986	0.0548898	0.00327323		0.0171898	0.00832497	0.0237507	0.00973298		0.116421	0.117245	0.182057	0.193997		0.0905682	0.0781543	0.0171395	0.0162882			0.0580565	0.0580565	0.0128347	0.0128347
C12H13O3+	205.086	2	0.00147523	0.00295047	0.000974495	0.00194899		0.043161	0.00664515	0.0313857	0.00277515		0.0117324	0.00587366	0.0152082	0.0037624		0.010229	0.0103081	0.016008	0.0170864		0.0128713	0.00694123	0.00255088	0.00168399			0.0109639	0.0109639	0.00247732	0.00247732
C16H13+	205.101	2	0.00201385	0.0040277	0.00133039	0.00266077		0.0273705	0.00460718	0.0198022	0.00196508		0.00506906	0.00194447	0.00743369	0.00355445		0.00738032	0.00745136	0.0115717	0.0124067		0.01153	0.00263208	0.00217014	0.00076748			0.0400942	0.0400942	0.00865626	0.00865626
C13H17O2+	205.122	2	0.00125127	0.00250255	0.0008267	0.0016534		0.102443	0.0123272	0.0771474	0.00718511		0.033587	0.0106567	0.0501908	0.0247156		0.0109347	0.011042	0.0171493	0.0183947		0.0304781	0.0145461	0.00585509	0.00338847			0.0307536	0.0307536	0.00707549	0.00707549
C10H21O4+	205.143	2	9.12437e-05	0.000182487	6.02898e-05	0.00012058		0.00263294	0.000316637	0.00197115	0.000170052		7.05924e-05	7.79614e-05	6.26837e-05	4.84361e-05		0.000409688	0.000411717	0.00063932	0.000677274		0.00109528	0.000500407	0.000204122	0.000112799			0.00121133	0.00121133	0.000277121	0.000277121
C14H21O+	205.159	2	0	0	0	0		0.00513218	0.000501543	0.00390454	0.000358639		0.00200056	0.000386001	0.00325236	0.00197022		0.00122565	0.000167128	0.00108593	0.000586958		0.00305071	0.00107123	0.000561339	0.000199115			0.00256929	0.00256929	0.000616063	0.000616063
C15H25+	205.195	2	0.0096032	0.00360347	0.01069	0.00692285		0.0836965	0.0225363	0.0569178	0.0152962		0.00638002	0.00382104	0.00993933	0.00656908		0.0153242	0.011427	0.0217149	0.0227712		0.0204489	0.00574602	0.00372259	0.00100028			0.00761501	0.00761501	0.00180782	0.00180782
C7H12NO6+	206.066	2	0.00372391	0.0022419	0.00343192	0.00130777		0.00450468	0.000875891	0.00318428	0.000371458		0.000680235	0.000620974	0.000697417	0.000193142		0.0033009	0.00289035	0.0049445	0.005134		0.00422837	0.00104964	0.000777167	0.000223946			0.00284435	0.00284435	0.000629494	0.000629494
C11H12NO3+	206.081	2	0.00015624	0.000312481	0.000103711	0.000207422		0.00415444	0.000905344	0.0030731	0.000472078		0.00189378	0.000582164	0.00288462	0.00150575		0.00250849	0.00255159	0.00397524	0.00432784		0.00681786	0.002852	0.00129236	0.00067335			0.000932029	0.000932029	0.000209668	0.000209668
C8H16NO5+	206.102	2	0.000781118	0.00156224	0.000518552	0.0010371		0.00924445	0.00170819	0.0066872	0.000754752		0.00185447	0.00167424	0.00206594	0.0006031		0.00612384	0.0061774	0.00964087	0.0103155		0.0112857	0.00381905	0.00219539	0.001046			0.00305563	0.00305563	0.000658486	0.000658486
C14H24N+	206.19	2	0.000110208	8.00539e-05	0.00012134	0.000117084		0.000817497	0.00025316	0.000562964	0.000129586		0.000163238	0.000103237	0.000294239	0.000217157		0.000502066	0.00050733	0.000792002	0.000850793		0.002517	0.000657567	0.000450995	7.24256e-05			0.000468171	0.000468171	0.000113052	0.000113052
C7H11O7+	207.05	2	0.000653484	0.000765806	0.000456311	0.000521273		0.00196857	0.000576167	0.00140447	0.000297417		0.000797168	0.000220522	0.0014283	0.00109067		0.000877361	0.000152016	0.000900509	0.000644831		0.00201299	0.00107034	0.000354961	0.000165042			0.00229743	0.00229743	0.000516199	0.000516199
C11H11O4+	207.065	2	0.0013526	0.00270521	0.000902155	0.00180431		0.0177016	0.00272805	0.0129434	0.00111133		0.00570519	0.00339192	0.00713071	0.00139952		0.00571049	0.00577541	0.00905343	0.00974419		0.00515827	0.00292625	0.00101669	0.000707509			0.00836198	0.00836198	0.00186467	0.00186467
C8H15O6+	207.086	2	0.000891394	0.00178279	0.0005946	0.0011892		0.00809093	0.0017695	0.00594283	0.000885578		0.00231518	0.000665526	0.0042973	0.00336684		0.00139984	0.00141246	0.00221493	0.00237142		0.00878002	0.00491998	0.00162488	0.000945922			0.0168133	0.0168133	0.00369531	0.00369531
C12H15O3+	207.102	2	0.00265491	0.00530981	0.00177107	0.00354214		0.0696295	0.0111096	0.0516851	0.00523687		0.0259748	0.0123283	0.0353824	0.0113077		0.018623	0.0188093	0.0294955	0.0316511		0.0224349	0.0103089	0.00444708	0.00251783			0.0223982	0.0223982	0.00515069	0.00515069
C16H15+	207.117	2	0.00526592	0.0105318	0.00351312	0.00702624		0.0503429	0.00860318	0.0363184	0.00349055		0.00850868	0.00462986	0.0107481	0.00267304		0.00500508	0.00506631	0.00794269	0.0085643		0.0100919	0.00230229	0.00195693	0.000755208			0.0496644	0.0496644	0.0109437	0.0109437
C13H19O2+	207.138	2	0.0011347	0.0022694	0.000757086	0.00151417		0.0389329	0.00467068	0.0293591	0.0024438		0.010688	0.00315996	0.016477	0.00873655		0.00589771	0.00568162	0.00912364	0.00945911		0.0117568	0.00425881	0.00225923	0.00102738			0.0161354	0.0161354	0.0036904	0.0036904
C10H23O4+	207.159	2	5.05208e-05	0.000101042	3.37116e-05	6.74231e-05		0.00115744	6.79206e-05	0.000902733	8.82559e-05		0	0	0	0		0.000162499	0.000187195	0.000271277	0.000342427		0.00145001	0.000351955	0.000266093	6.66514e-05			0.00169033	0.00169033	0.000383413	0.000383413
C14H23O+	207.174	2	0.000107054	0.000214108	7.14404e-05	0.000142881		0.00405949	0.000605013	0.00296918	0.000239441		0.000888477	0.000170344	0.00152002	0.000934557		0.00167418	0.000847027	0.0021369	0.0019339		0.00449523	0.00104306	0.000825975	0.000150793			0.00259036	0.00259036	0.000631351	0.000631351
C15H27+	207.211	2	2.8913e-05	5.63011e-05	1.99328e-05	3.73071e-05		0.00137683	0.000323171	0.000931344	0.000154973		0.000146289	8.71715e-05	0.000228846	0.000145366		0.00119258	0.0012097	0.0018965	0.0020537		0.00394759	0.00120982	0.000739621	0.000242222			0.00221758	0.00221758	0.000544864	0.000544864
C6H10NO7+	208.045	2	0.000709206	0.00058088	0.000589087	0.000395097		0.00130435	0.000268498	0.00094068	0.000121906		0.00023972	0.000185248	0.000259363	8.37176e-05		0.00061056	0.000610598	0.000955585	0.000988627		0.00159651	0.000390403	0.000300009	8.1654e-05			0.000735395	0.000735395	0.000164344	0.000164344
C10H10NO4+	208.06	2	0.000172244	0.000344487	0.000115437	0.000230875		0.000752732	0.000185106	0.000573737	0.000107358		0.000677011	0.000313688	0.00106405	0.000728097		0.000345079	0.00011438	0.000384116	0.000328808		0.00120959	0.00078122	0.000220519	0.000133089			7.82057e-05	7.82057e-05	2.1873e-05	2.1873e-05
C14H10NO+	208.076	2	0.000277644	0.000555287	0.00018609	0.00037218		0.00242481	0.000410134	0.00175998	0.000166941		0.000675136	0.000370543	0.000872548	0.000201811		0.00302306	0.00303592	0.00478087	0.00505394		0.00565104	0.00116214	0.00106495	0.000259282			0.00241937	0.00241937	0.000533431	0.000533431
C11H14NO3+	208.097	2	0.000429298	0.000858596	0.000287765	0.00057553		0.0054466	0.000863381	0.00407861	0.000421927		0.00215466	0.000820503	0.00315299	0.00140769		0.00426265	0.00430973	0.00679	0.00730293		0.0103505	0.00478752	0.00206978	0.0011736			0.00177903	0.00177903	0.000411011	0.000411011
C15H14N+	208.112	2	0.000145642	0.000291284	9.76332e-05	0.000195266		0.00153656	0.000222263	0.00114164	9.66569e-05		0.000422277	0.00035913	0.000466525	9.36601e-05		0.000872739	0.000885782	0.00139455	0.00151187		0.00303195	0.00126141	0.000585692	0.000297982			0.00175604	0.00175604	0.000392698	0.000392698
C12H18NO2+	208.133	2	2.51448e-05	5.02895e-05	1.68579e-05	3.37158e-05		0.00495504	0.000802953	0.00374561	0.000426252		0.0013656	0.000393285	0.00209855	0.00104915		0.00211388	0.00212211	0.00334227	0.00352904		0.010343	0.00450011	0.00200337	0.00104834			0.000975054	0.000975054	0.000234925	0.000234925
C13H22NO+	208.17	2	0	0	0	0		0.000449293	5.63984e-05	0.000346812	3.72695e-05		0.000117232	1.98853e-05	0.000203164	0.000122556		0.000516603	0.000517475	0.000813846	0.000852122		0.00281372	0.000802596	0.000523327	0.00013941			0.00021332	0.00021332	5.19221e-05	5.19221e-05
C14H26N+	208.206	2	2.59132e-05	5.18264e-05	1.73792e-05	3.47583e-05		0.00026092	5.34918e-05	0.00019163	2.57122e-05		5.91719e-05	1.66532e-05	9.242e-05	4.1199e-05		0.000422704	0.000328034	0.000612655	0.000622218		0.00324244	0.000632049	0.000599635	8.94301e-05			0.000490213	0.000490213	0.000119276	0.000119276
C6H9O8+	209.029	2	7.24139e-05	0.000144828	4.87587e-05	9.75174e-05		0.000580394	0.000102163	0.000445312	5.932e-05		0.000194299	0.000222058	0.000519929	0.000680282		0.000193749	0.000159624	9.63986e-05	4.9042e-05		0.000407907	0.000348138	7.52255e-05	5.62743e-05			0.000822943	0.000822943	0.000179173	0.000179173
C10H9O5+	209.044	2	0.00156406	0.00109633	0.00138251	0.000675435		0.00246282	0.000409225	0.00179872	0.000166265		0.00106773	0.000827272	0.00115416	0.000381973		0.00078592	0.000793777	0.00125648	0.00134829		0.000752544	0.000330935	0.000146632	7.65588e-05			0.00174439	0.00174439	0.000379999	0.000379999
C14H9O2+	209.06	2	0.00120335	0.00204805	0.000816903	0.00137787		0.00581336	0.00112496	0.00428782	0.000529206		0.00147365	0.000386693	0.00244246	0.00154777		0.0011159	0.00113889	0.00179806	0.00196942		0.00410609	0.00139222	0.000775287	0.000240388			0.0067876	0.0067876	0.00150929	0.00150929
C11H13O4+	209.081	2	0.00247343	0.00494685	0.00166585	0.00333171		0.0402568	0.00662365	0.0299014	0.0029816		0.0176084	0.00939543	0.0235136	0.00683609		0.014214	0.0143324	0.0226932	0.0242569		0.0128635	0.00490067	0.00256133	0.00127567			0.0137919	0.0137919	0.00325016	0.00325016
C8H17O6+	209.102	2	0.00087455	0.0017491	0.000589069	0.00117814		0.0101479	0.00203723	0.00754681	0.00101006		0.00361711	0.000943142	0.00569024	0.00295481		0.00253339	0.00253769	0.00400912	0.00419792		0.0045404	0.00159086	0.000877734	0.000389881			0.00795484	0.00795484	0.00182787	0.00182787
C12H17O3+	209.117	2	0.000581889	0.00116378	0.000391971	0.000783942		0.027561	0.00438542	0.0207468	0.00216204		0.0143393	0.00813473	0.0198078	0.00882786		0.00502024	0.0050701	0.00802841	0.00861374		0.00842471	0.00353006	0.00167895	0.000886166			0.0106852	0.0106852	0.00254286	0.00254286
C16H17+	209.132	2	0.000276097	0.000552195	0.000185998	0.000371995		0.0441247	0.00689285	0.0330786	0.00325505		0.00600289	0.00290724	0.0078796	0.0025516		0.0022366	0.00225537	0.00357192	0.00381861		0.00836054	0.00289072	0.00161048	0.000711898			0.0236089	0.0236089	0.0056583	0.0056583
C13H21O2+	209.154	2	4.45706e-05	8.91411e-05	3.00288e-05	6.00576e-05		0.00804365	0.00101839	0.00609988	0.000511058		0.00221408	0.000666183	0.00346064	0.00190587		0.00241183	0.00220759	0.00371959	0.00387621		0.00480108	0.00103087	0.000909539	0.000218922			0.00330569	0.00330569	0.00079191	0.00079191
C14H25O+	209.19	2	2.45127e-05	4.90255e-05	1.6518e-05	3.3036e-05		0.001636	0.000221189	0.0012198	9.06754e-05		0.000242373	0.000107123	0.000429216	0.000253501		0.00155084	0.00155259	0.00245189	0.00255993		0.00315632	0.000641179	0.000593742	0.000102493			0.00181684	0.00181684	0.000446097	0.000446097
C15H29+	209.226	2	9.7303e-06	1.94606e-05	6.55795e-06	1.31159e-05		0.000631073	0.000153441	0.000442354	7.33225e-05		5.75333e-05	4.75778e-05	8.87748e-05	8.26618e-05		0.000414324	0.000328072	0.000606095	0.000600941		0.00217012	0.000605463	0.000410593	0.000109563			0.0015299	0.0015299	0.000365138	0.000365138
C9H8NO5+	210.04	2	0.000117183	0.000234365	7.92862e-05	0.000158572		0.000808878	0.000158746	0.000597458	7.44793e-05		0.000436765	0.000188761	0.000617571	0.000219188		0.000641344	0.000642688	0.00102033	0.00107025		0.00201776	0.000381134	0.000387842	9.66174e-05			0.0006875	0.0006875	0.00015019	0.00015019
C6H12NO7+	210.061	2	0.00106999	0.000577315	0.00104851	0.000351629		0.000721563	0.000140921	0.000517615	6.0698e-05		7.6622e-05	6.95049e-05	7.84372e-05	6.60396e-05		0.000566039	0.000600384	0.000933446	0.00107997		0.00143608	0.000620167	0.000269953	0.000110097			0.00058556	0.00058556	0.000130353	0.000130353
C10H12NO4+	210.076	2	0.000363168	0.000726336	0.000245764	0.000491527		0.00364696	0.00071161	0.00268794	0.000329764		0.00154958	0.000875908	0.00214624	0.000945506		0.00334994	0.00337602	0.00537099	0.00573349		0.00498712	0.0012441	0.000986884	0.000373545			0.00304421	0.00304421	0.000668158	0.000668158
C7H16NO6+	210.097	2	0.000369656	0.000739313	0.00025018	0.00050036		0.00604131	0.00110043	0.00453385	0.000540858		0.00164577	0.000897011	0.00217879	0.000564436		0.00366728	0.00368397	0.00585865	0.00619898		0.00983576	0.00649255	0.00193679	0.00149082			0.0062387	0.0062387	0.00138741	0.00138741
C11H16NO3+	210.112	2	8.42593e-05	0.000168519	5.703e-05	0.00011406		0.0101043	0.00146322	0.00763092	0.000690674		0.00278707	0.00136558	0.00393448	0.00161748		0.00340768	0.00345483	0.00549319	0.00594242		0.0174644	0.0122316	0.00361238	0.00286288			0.00161614	0.00161614	0.000385341	0.000385341
C15H16N+	210.128	2	2.86066e-05	5.72132e-05	1.93635e-05	3.87269e-05		0.00263561	0.000489279	0.00199946	0.000257984		0.000235107	8.11287e-05	0.000338304	0.000130669		0.00151422	0.00153734	0.00244368	0.00265092		0.00723847	0.0037134	0.00137822	0.000755075			0.00138451	0.00138451	0.000326332	0.000326332
C12H20NO2+	210.149	2	8.97663e-05	0.000179533	6.07679e-05	0.000121536		0.00498135	0.000518349	0.0037864	0.000239365		0.0021427	0.000458215	0.00339154	0.0016545		0.00392218	0.00266162	0.00548697	0.00528231		0.0250946	0.00603962	0.0048354	0.00130464			0.000920674	0.000920674	0.000225436	0.000225436
C13H24NO+	210.185	2	1.78095e-05	3.5619e-05	1.20584e-05	2.41167e-05		0.000459736	9.12391e-05	0.000340613	4.34982e-05		6.79215e-05	2.78301e-05	9.74443e-05	3.98424e-05		0.000459035	0.000404019	0.000698684	0.000721739		0.00308401	0.000930025	0.000593361	0.000178273			0.000265311	0.000265311	6.60208e-05	6.60208e-05
C14H28N+	210.222	2	1.74985e-06	3.49969e-06	1.18498e-06	2.36997e-06		0.000218808	2.71592e-05	0.00016232	8.80512e-06		3.19647e-05	1.50735e-05	4.54528e-05	1.44385e-05		0.000183292	0.000149276	0.000274336	0.000294221		0.00233675	0.000416046	0.000450349	0.000103538			0.000332051	0.000332051	7.97507e-05	7.97507e-05
C6H11O8+	211.045	2	0.000126602	0.000133673	9.75488e-05	8.90417e-05		0.000101858	7.04145e-05	8.37486e-05	4.56935e-05		0.000238993	0.000227718	0.000598069	0.000752993		3.19877e-05	3.86835e-05	1.37131e-05	1.84196e-05		0.000576323	0.000558385	0.000107913	0.000105413			0.000577013	0.000577013	0.000134769	0.000134769
C10H11O5+	211.06	2	0.00119723	0.00239447	0.000814007	0.00162801		0.0133872	0.00232761	0.00983793	0.000973635		0.00518075	0.00357528	0.00638712	0.0013475		0.00329391	0.00334655	0.0053422	0.00580307		0.00407244	0.00128786	0.000787435	0.000284815			0.0103028	0.0103028	0.00231844	0.00231844
C7H15O7+	211.081	2	0.00148958	0.00297916	0.00101288	0.00202575		0.00675206	0.00120006	0.00499507	0.000526063		0.00208751	0.000649731	0.00383568	0.00314335		0.00388701	0.00393226	0.006284	0.00676734		0.00582288	0.00140837	0.00113982	0.000344908			0.012567	0.012567	0.00278343	0.00278343
C11H15O4+	211.096	2	0.0022163	0.0044326	0.00150714	0.00301428		0.0563834	0.00945286	0.0425201	0.00451672		0.0270483	0.0170524	0.0367304	0.0158759		0.0163296	0.0164915	0.0263623	0.0282831		0.0166052	0.00579432	0.00336214	0.00153471			0.0239364	0.0239364	0.00561083	0.00561083
C15H15O+	211.112	2	0.00175283	0.00350566	0.00119205	0.0023841		0.084203	0.0126735	0.0636007	0.00583535		0.0144981	0.00837567	0.0186364	0.00385524		0.0117061	0.0117969	0.0188609	0.0201322		0.0167138	0.00546103	0.00337492	0.00151297			0.0463793	0.0463793	0.0111936	0.0111936
C12H19O3+	211.133	2	0.000373816	0.000747633	0.000254248	0.000508497		0.0207137	0.00338558	0.0157543	0.00170893		0.00887687	0.00450161	0.0130987	0.0071983		0.00390296	0.00394174	0.00630211	0.00676162		0.00715469	0.00227957	0.00143623	0.000629999			0.00959015	0.00959015	0.0023112	0.0023112
C16H19+	211.148	2	0	0	0	0		0.0249041	0.00249556	0.0195535	0.00188475		0.00251439	0.000852639	0.003747	0.00164505		0.00117652	0.00118859	0.00190041	0.00204047		0.00475801	0.00162282	0.000925721	0.00035971			0.00804596	0.00804596	0.00200709	0.00200709
C13H23O2+	211.169	2	7.33688e-05	0.000146738	4.99098e-05	9.98197e-05		0.00543912	0.000610709	0.00413293	0.000261667		0.000748762	0.000214656	0.00113665	0.000482275		0.00110795	0.00107607	0.00175921	0.00184767		0.00266421	0.000394387	0.000515698	9.53631e-05			0.0024305	0.0024305	0.000596137	0.000596137
C14H27O+	211.206	2	5.56538e-05	0.000111308	3.78656e-05	7.57312e-05		0.00111961	0.000258543	0.00080445	0.00012258		0.0002304	8.55345e-05	0.000361749	0.000187723		0.00166781	0.00168033	0.0026877	0.00286709		0.00353569	0.000651116	0.000668807	5.03814e-05			0.00324288	0.00324288	0.000795537	0.000795537
C15H31+	211.242	2	3.35956e-05	6.71913e-05	2.28617e-05	4.57233e-05		0.00125856	0.000392236	0.000860669	0.000207707		0.000330281	0.000155421	0.000511764	0.000270387		0.00116164	0.000711857	0.00159628	0.00153804		0.00566937	0.00154457	0.00109191	0.000285719			0.00472345	0.00472345	0.00111483	0.00111483
C14H14NO+	212.107	2	0.000178273	0.000356546	0.000121813	0.000243626		0.00268154	0.000607126	0.00204707	0.000332025		0.00068793	0.000224038	0.00101832	0.000370112		0.00271865	0.00274463	0.00440864	0.00472599		0.00829308	0.00540248	0.00167865	0.00127427			0.00296332	0.00296332	0.00068994	0.00068994
C11H18NO3+	212.128	2	0	0	0	0		0.00914228	0.00152671	0.00689863	0.000709279		0.00301054	0.00183215	0.00412428	0.00169139		0.00368158	0.00373845	0.00599902	0.00650999		0.021096	0.0173895	0.00439266	0.0040823			0.000958921	0.000958921	0.000232173	0.000232173
C15H18N+	212.143	2	0	0	0	0		0.00113487	0.000155956	0.000896053	0.000106329		0.000117007	6.32984e-05	0.000166064	0.000112776		0.000442637	0.000442638	0.000705255	0.000727309		0.00179581	0.000793887	0.000361271	0.000198971			0.000444503	0.000444503	0.000109407	0.000109407
C12H22NO2+	212.165	2	3.86095e-06	7.72189e-06	2.63888e-06	5.27777e-06		0.00111911	6.62147e-05	0.00090007	9.62465e-05		0.000255996	6.64496e-05	0.000421866	0.000248799		0.000374303	0.000379259	0.000609021	0.000658044		0.00286535	0.00112553	0.000568881	0.000277482			0.000314505	0.000314505	7.87351e-05	7.87351e-05
C13H26NO+	212.201	2	3.92948e-05	7.85895e-05	2.68619e-05	5.37237e-05		0.000554882	6.46687e-05	0.000401766	2.27925e-05		6.66113e-05	1.9901e-05	0.000113125	5.54198e-05		0.00167191	0.00128261	0.00243471	0.00239052		0.00875145	0.00206987	0.00172035	0.000454343			0.000937002	0.000937002	0.000239755	0.000239755
C14H30N+	212.237	2	1.24768e-05	2.49536e-05	8.5306e-06	1.70612e-05		0.000196639	3.33036e-05	0.000147948	1.52299e-05		5.33662e-05	1.48978e-05	8.61486e-05	3.88391e-05		0.000252904	0.000256033	0.000395166	0.000397084		0.00345777	0.000798084	0.000672339	0.000162447			0.000570339	0.000570339	0.000138578	0.000138578
C9H9O6+	213.039	2	0.000356828	0.000254787	0.000359531	0.000203612		0.00175066	0.000570483	0.00127581	0.00030989		0.00115405	0.000733008	0.00160498	0.0007646		0.000209268	0.000221325	8.63727e-05	0.000101614		0.000668958	0.000604107	0.000123172	0.000105842			0.00104583	0.00104583	0.000242474	0.000242474
C10H13O5+	213.076	2	0.00109665	0.0021933	0.000752774	0.00150555		0.0127853	0.00236871	0.0095817	0.00109387		0.00717542	0.00461438	0.00978783	0.0042799		0.00404292	0.00357889	0.00627918	0.00646143		0.00400592	0.000402818	0.000787005	0.000110174			0.00734327	0.00734327	0.00171246	0.00171246
C14H13O2+	213.091	2	0.00190167	0.00380335	0.00130546	0.00261092		0.0209229	0.00326795	0.0156674	0.0013319		0.0055304	0.0030019	0.00710699	0.00158627		0.0102714	0.0103564	0.0167139	0.0178632		0.00749683	0.00706051	0.00158684	0.00163899			0.00725404	0.00725404	0.00168538	0.00168538
C11H17O4+	213.112	2	0.000351445	0.00070289	0.000241284	0.000482568		0.0120129	0.00227458	0.00911157	0.0011275		0.00671767	0.00457835	0.00891839	0.00350053		0.00251388	0.00148167	0.00343767	0.00323902		0.0029944	0.00105046	0.00061042	0.000274206			0.00396194	0.00396194	0.00095516	0.00095516
C15H17O+	213.127	2	0.00164339	0.00328678	0.00112835	0.0022567		0.0520454	0.00667202	0.0399075	0.0030668		0.0114122	0.00561878	0.0155912	0.00415068		0.0114708	0.01157	0.0186755	0.0199775		0.0159416	0.0046875	0.00326703	0.00134565			0.014406	0.014406	0.00347729	0.00347729
C12H21O3+	213.149	2	0.000324094	0.000648188	0.000222545	0.000445089		0.012005	0.00195094	0.00932754	0.00109203		0.00323812	0.000937194	0.00531634	0.00303139		0.0017965	0.00184444	0.00296203	0.00327667		0.00893214	0.00257732	0.00172827	0.000490917			0.00599268	0.00599268	0.00147574	0.00147574
C16H21+	213.164	2	0	0	0	0		0.00510629	0.000331813	0.00426929	0.00064479		0.00106588	0.000317921	0.0017626	0.000831134		0.000605972	0.000460302	0.000885747	0.00088119		0.00316366	0.000863618	0.00062085	0.000157901			0.00274683	0.00274683	0.000700495	0.000700495
C13H25O2+	213.185	2	0.000169949	0.000339898	0.000116718	0.000233437		0.00383213	0.00030913	0.0029739	0.000168118		0.000476194	0.000139567	0.000709609	0.000239385		0.00120302	0.00121896	0.00196688	0.00212523		0.00226264	0.000274673	0.000445185	6.73677e-05			0.00263045	0.00263045	0.000653046	0.000653046
C14H29O+	213.221	2	4.97474e-05	9.94949e-05	3.41716e-05	6.83432e-05		0.00104067	0.000209231	0.00078781	0.000104978		0.000206377	0.000100306	0.000339559	0.000247234		0.000659262	0.000365204	0.000440772	0.00012131		0.00184411	0.000441338	0.000365713	9.91308e-05			0.00144217	0.00144217	0.000354996	0.000354996
C12H8NO3+	214.05	2	0.000165431	0.000330862	0.000114079	0.000228157		0.000474391	0.000100421	0.000320371	5.77437e-05		0.000897261	0.000561881	0.00122646	0.000570038		0.00111339	0.00045608	0.000843064	0.000417307		0.00157719	0.00114488	0.000292824	0.000192613			0.000810847	0.000810847	0.00019031	0.00019031
C5H12NO8+	214.056	2	0.00312897	0.00297534	0.00244378	0.00214232		0.00614881	0.00130147	0.00464798	0.000654265		0.00107611	0.000332389	0.0016651	0.00066364		0.00751025	0.00776482	0.0124818	0.0139568		0.00565254	0.00365058	0.00118053	0.000883698			0.00352039	0.00352039	0.000794432	0.000794432
C9H12NO5+	214.071	2	0.0107058	0.0143648	0.00753729	0.00998388		0.0421655	0.00797714	0.0311355	0.0034894		0.0316993	0.0208355	0.0425728	0.0165189		0.0201089	0.0204499	0.0331034	0.0360249		0.0729177	0.0120678	0.014474	0.00272178			0.0141044	0.0141044	0.00334018	0.00334018
C13H12NO2+	214.086	2	0.00217135	0.0016649	0.00196331	0.00113921		0.00195774	0.000430312	0.00147568	0.000217323		3.93632e-05	3.89963e-05	4.35554e-05	4.4479e-05		0.000943101	0.000775379	0.00144306	0.00154934		0.00102829	0.000409844	0.000205998	7.9251e-05			0.00100586	0.00100586	0.000238977	0.000238977
C10H16NO4+	214.107	2	5.43795e-05	0.000108759	3.75093e-05	7.50186e-05		0.00252529	0.00042092	0.00191475	0.000191002		0.000484088	0.000439713	0.000546858	0.000145851		0.000734168	0.000734357	0.00118442	0.00122881		0.00361517	0.00211394	0.000773445	0.000533063			0.00038284	0.00038284	9.26969e-05	9.26969e-05
C14H16NO+	214.123	2	4.66374e-05	9.32748e-05	3.21714e-05	6.43427e-05		0.00105229	0.000191002	0.000807264	9.72644e-05		0.000315773	6.10648e-05	0.000515646	0.000249872		0.000995576	0.00100794	0.00163385	0.00176241		0.00225212	0.000946423	0.00045342	0.000230585			0.000502013	0.000502013	0.000118921	0.000118921
C11H20NO3+	214.144	2	0	0	0	0		0.00398695	0.000570562	0.00301733	0.00022707		0.00141008	0.000674993	0.00204314	0.000885292		0.00178812	0.00180562	0.00292826	0.00314073		0.0133327	0.00442272	0.00274742	0.00118935			0.000874267	0.000874267	0.000212212	0.000212212
C15H20N+	214.159	2	0	0	0	0		0.00143562	0.000245433	0.00114512	0.000161901		0.000399615	8.82455e-05	0.000678181	0.000329646		0.00103143	0.00103144	0.00165885	0.00171032		0.00413665	0.00102412	0.00082755	0.000266725			0.00090016	0.00090016	0.000226801	0.000226801
C12H24NO2+	214.18	2	5.81744e-05	0.000116349	4.01406e-05	8.02812e-05		0.00111628	0.000369484	0.000829225	0.000205294		0.000149993	7.9268e-05	0.00019978	3.84303e-05		0.000621196	0.000634071	0.00102565	0.00112364		0.00221141	0.000669935	0.000444552	0.000160583			0.000219847	0.000219847	5.41062e-05	5.41062e-05
C9H11O6+	215.055	2	0.00115199	0.00122796	0.000863976	0.000862665		0.00928443	0.00200784	0.00688677	0.000956329		0.00377461	0.00252042	0.00525886	0.00264512		0.000827226	0.000373216	0.00105969	0.000971802		0.00159311	0.000850478	0.000303972	0.000130972			0.017429	0.017429	0.00400844	0.00400844
C13H11O3+	215.07	2	0.00734339	0.00521616	0.00644199	0.00312252		0.00606627	0.000830263	0.00444677	0.000270479		0.00263965	0.0016333	0.00358962	0.00226862		0.0138717	0.0140028	0.0228083	0.0244443		0.00865154	0.00721197	0.0018172	0.00173072			0.00991465	0.00991465	0.00223861	0.00223861
C10H15O5+	215.091	2	0.000987797	0.000878994	0.000839511	0.000549435		0.00217506	0.000880901	0.00158405	0.000503676		0.00154228	0.00117221	0.00301984	0.00342991		0.000352409	0.000172043	0.00046518	0.000428113		0.00271504	0.00232928	0.00053459	0.000491139			0.00501825	0.00501825	0.00117317	0.00117317
C11H19O4+	215.128	2	0.000126047	0.000252095	8.736e-05	0.00017472		0.00407891	0.00102869	0.00318911	0.000601019		0.00416188	0.00204112	0.00633932	0.00359106		0.000812521	0.000382495	0.0010605	0.000958161		0.00118296	0.000937038	0.000236197	0.000214497			0.00190923	0.00190923	0.00046499	0.00046499
C15H19O+	215.143	2	0.000381563	0.000763125	0.000264469	0.000528939		0.0250704	0.00331447	0.0195395	0.00170391		0.00512177	0.00203053	0.00740384	0.0023485		0.00377347	0.00379147	0.00617552	0.00653859		0.00775106	0.00217501	0.00159537	0.000564794			0.00637989	0.00637989	0.00158434	0.00158434
C12H23O3+	215.164	2	4.56658e-05	9.13316e-05	3.16551e-05	6.33102e-05		0.00447701	0.000700683	0.00348359	0.000367838		0.000749895	0.000173529	0.00133976	0.000885767		0.000539028	0.000559641	0.000902351	0.00101512		0.00272956	0.00102251	0.000535357	0.000201991			0.00215212	0.00215212	0.00053144	0.00053144
C16H23+	215.179	2	3.67996e-05	7.35992e-05	2.5511e-05	5.10219e-05		0.0035373	0.000442879	0.00284104	0.000324666		0.000822757	0.000263633	0.00138393	0.000695068		0.000676795	0.000479867	0.000982669	0.000954228		0.00326934	0.00112933	0.00065178	0.000196281			0.00196332	0.00196332	0.000498305	0.000498305
C13H27O2+	215.201	2	4.05262e-05	8.10525e-05	2.80972e-05	5.61943e-05		0.00101856	0.000143109	0.000785304	6.57469e-05		2.39444e-05	3.16213e-05	3.58939e-05	4.73203e-05		0.000170345	0.000173874	0.000282598	0.000309594		0.000698136	0.000108047	0.000141529	3.21341e-05			0.000816716	0.000816716	0.000204201	0.000204201
C8H10NO6+	216.05	2	0.000737355	0.00060596	0.000622332	0.00041993		0.00692982	0.00129259	0.00541257	0.000706676		0.00208199	0.000921666	0.00313248	0.00147529		0.000821198	0.000821204	0.00133371	0.00137746		0.00496973	0.00231356	0.000998845	0.000505689			0.00122048	0.00122048	0.000292016	0.000292016
C12H10NO3+	216.066	2	0.00034529	0.000501103	0.000244254	0.00034963		0.00130064	0.000225192	0.000979819	9.66771e-05		0.000422315	0.00024681	0.000583459	0.000222058		0.00183385	0.00187214	0.0030549	0.00334765		0.00201819	0.00120888	0.000411551	0.000280359			0.000336672	0.000336672	8.01838e-05	8.01838e-05
C9H14NO5+	216.087	2	0.000223787	0.000260573	0.000163571	0.000183533		0.00120057	0.000202435	0.000912642	8.94242e-05		0.000378885	0.000224692	0.000525218	0.00019576		0.000904838	0.000910443	0.00148991	0.00158392		0.00133129	0.000442798	0.000280006	0.000129779			0.000510912	0.000510912	0.000116693	0.000116693
C13H14NO2+	216.102	2	0.000187685	0.000375369	0.000130671	0.000261341		0.00120214	0.000344919	0.00090032	0.000186113		0.000424401	0.000177812	0.00061175	0.000208688		0.00188578	0.00190613	0.0031193	0.0033531		0.0021822	0.000440394	0.000454966	0.000149287			0.000855484	0.000855484	0.000197375	0.000197375
C10H18NO4+	216.123	2	1.73259e-05	3.46519e-05	1.2064e-05	2.41279e-05		0.000415408	0.000115782	0.000309369	6.14466e-05		7.36561e-05	6.83367e-05	8.72373e-05	4.23009e-05		0.000219506	0.00021992	0.000353661	0.000360292		0.00165439	0.00119236	0.000356029	0.00029549			0.000119204	0.000119204	2.87668e-05	2.87668e-05
C14H18NO+	216.138	2	6.01748e-06	1.2035e-05	4.19023e-06	8.38046e-06		0.00155588	0.000218821	0.00121061	0.000106722		0.000382185	0.000111242	0.000601115	0.000263158		0.000998668	0.00101447	0.00165865	0.00180121		0.00257257	0.00106355	0.000535671	0.000273012			0.000315984	0.000315984	7.84203e-05	7.84203e-05
C11H22NO3+	216.159	2	1.17678e-05	2.35355e-05	8.19521e-06	1.63904e-05		0.000534093	9.3649e-05	0.000413024	4.70987e-05		4.4111e-05	3.32352e-05	6.11113e-05	4.27848e-05		0.000304885	0.000310992	0.000507844	0.000555699		0.00103439	0.000420528	0.00021651	0.000111638			0.000155742	0.000155742	3.85399e-05	3.85399e-05
C15H22N+	216.175	2	9.34973e-06	1.86995e-05	6.51172e-06	1.30234e-05		0.000342147	5.89584e-05	0.000276712	4.04141e-05		0.000134181	1.67576e-05	0.00022894	0.000117472		0.000244803	0.000245587	0.000401671	0.000423128		0.00143888	0.00036251	0.000282204	4.53889e-05			0.000201049	0.000201049	5.00611e-05	5.00611e-05
C12H26NO2+	216.196	2	0	0	0	0		0.000384602	5.14535e-05	0.000285973	1.56506e-05		3.03046e-05	2.05563e-05	3.47922e-05	1.48561e-05		0.00039052	0.000391306	0.000639485	0.000670538		0.00298157	0.000505227	0.000599991	0.000107663			0.000149283	0.000149283	3.74719e-05	3.74719e-05
C12H9O4+	217.05	2	0.00163045	0.00145046	0.00136014	0.00101072		0.00132658	0.000153919	0.000994151	3.71588e-05		0.000599154	0.000320291	0.000811803	0.00023152		0.000945063	0.000890831	0.00152661	0.00159052		0.00211481	0.000784779	0.000426771	0.000161512			0.00241352	0.00241352	0.000555635	0.000555635
C9H13O6+	217.071	2	0.00217467	0.00434934	0.00152088	0.00304176		0.0248701	0.00421837	0.0190733	0.00193018		0.0134939	0.00677472	0.0197397	0.00873661		0.00586884	0.00494875	0.00910817	0.00915919		0.00788814	0.00132542	0.00161065	0.000328193			0.0171248	0.0171248	0.00410194	0.00410194
C13H13O3+	217.086	2	0.00548928	0.0109786	0.00383926	0.00767852		0.0588137	0.00956203	0.044762	0.00404041		0.0199674	0.0126019	0.0254524	0.00484068		0.0390798	0.0395066	0.0649456	0.0698331		0.0254325	0.0240672	0.00548511	0.00569962			0.0174487	0.0174487	0.0042129	0.0042129
C10H17O5+	217.107	2	0.000281505	0.000563009	0.000196907	0.000393813		0.00285939	0.000641072	0.00221608	0.000346886		0.00137823	0.000482995	0.00226571	0.00135467		0.00138539	0.00141795	0.00232266	0.00255637		0.00200396	0.000410178	0.000417915	0.000128988			0.003802	0.003802	0.000865297	0.000865297
C14H17O2+	217.122	2	0.000695771	0.00139154	0.000486711	0.000973423		0.0352298	0.00532996	0.0274055	0.00256114		0.0105859	0.00478676	0.0149497	0.00402141		0.00769924	0.00776393	0.0127681	0.0136503		0.0103941	0.00452961	0.0022632	0.00123426			0.00802713	0.00802713	0.00193165	0.00193165
C11H21O4+	217.143	2	0.000142807	0.000285613	9.99069e-05	0.000199814		0.00664692	0.000835478	0.00523413	0.000434724		0.000917903	0.00025178	0.00156129	0.000993828		0.000932445	0.000940015	0.00154605	0.00165174		0.00262675	0.000938993	0.000547806	0.000245595			0.00282252	0.00282252	0.000677166	0.000677166
C15H21O+	217.159	2	0.000133123	0.000266246	9.31389e-05	0.000186278		0.015508	0.00200335	0.0123395	0.00119395		0.00439377	0.00118511	0.00701157	0.00329935		0.00276534	0.00208615	0.00414883	0.00412119		0.00691907	0.00179603	0.00142118	0.000413544			0.00523834	0.00523834	0.00132563	0.00132563
C12H25O3+	217.18	2	3.81273e-05	7.62546e-05	2.66782e-05	5.33565e-05		0.00277401	0.000349495	0.00216095	0.000154908		1.26109e-05	2.28598e-05	2.85267e-05	5.58837e-05		0.000486891	0.000488804	0.000785554	0.000796513		0.00317833	0.0016693	0.00062411	0.000313102			0.00193609	0.00193609	0.000483463	0.000483463
C16H25+	217.195	2	1.51081e-05	3.02161e-05	1.05721e-05	2.11442e-05		0.00161602	0.000322614	0.00124557	0.000164022		0.000598191	0.000156943	0.000976092	0.000457614		0.00104304	0.000851523	0.00160608	0.00163493		0.00472202	0.00157367	0.000958806	0.000283913			0.00200282	0.00200282	0.000509069	0.000509069
C13H29O2+	217.216	2	1.84933e-05	3.69865e-05	1.29422e-05	2.58843e-05		0.000473462	7.39325e-05	0.000362063	3.11168e-05		4.91096e-05	3.82194e-05	6.60558e-05	5.66419e-05		0.000178827	6.30428e-05	0.00014113	4.89705e-05		0.000838737	0.000127855	0.000174267	4.38902e-05			0.00107982	0.00107982	0.000269876	0.000269876
C8H12NO6+	218.066	2	0.00165924	0.00116255	0.00150029	0.000770183		0.00344713	0.00063072	0.00260567	0.000278342		0.000867115	0.000626445	0.00116854	0.000538578		0.00159021	0.00159053	0.00261223	0.00270838		0.00337121	0.00088509	0.00070182	0.000236306			0.00264907	0.00264907	0.000601709	0.000601709
C12H12NO3+	218.081	2	0.000430387	0.000860773	0.000302403	0.000604807		0.00376813	0.000691373	0.00288969	0.000324504		0.00153989	0.000556574	0.00235899	0.000939759		0.00456343	0.00464623	0.00765983	0.0083538		0.00705576	0.00133942	0.00149833	0.000483707			0.00209591	0.00209591	0.000473998	0.000473998
C9H16NO5+	218.102	2	0.000406831	0.000813663	0.00028588	0.000571761		0.00547562	0.000927026	0.00418192	0.00040351		0.00181328	0.00102169	0.002559	0.000971532		0.00368577	0.00372876	0.00615792	0.00663193		0.00768161	0.00206162	0.00165711	0.000683182			0.00302876	0.00302876	0.000681584	0.000681584
C13H16NO2+	218.118	2	0.000164851	0.000329701	0.000115849	0.000231697		0.00348182	0.000581517	0.00272386	0.000294946		0.00105092	0.000389239	0.00158696	0.000596836		0.00250686	0.00252761	0.00417589	0.00446307		0.0052716	0.00186496	0.00113762	0.000526723			0.00116724	0.00116724	0.000275348	0.000275348
C10H20NO4+	218.139	2	5.58197e-07	1.11639e-06	3.92311e-07	7.84621e-07		0.00141874	0.000144357	0.00111223	5.83015e-05		0.000150513	0.000123676	0.000180218	5.56242e-05		0.000594996	0.000599818	0.000991066	0.00105878		0.00210117	0.000851283	0.000454197	0.000238177			0.000326027	0.000326027	7.75243e-05	7.75243e-05
C14H20NO+	218.154	2	1.71704e-05	3.43408e-05	1.20685e-05	2.4137e-05		0.000410217	8.18652e-05	0.000326442	4.80344e-05		0.000131579	1.64109e-05	0.000223147	0.000114971		0.00041088	0.000416585	0.000687835	0.000744159		0.0011672	0.000436751	0.000242882	0.000105921			0.000135898	0.000135898	3.40709e-05	3.40709e-05
C11H24NO3+	218.175	2	1.97556e-05	3.95112e-05	1.38869e-05	2.77738e-05		0.000283992	3.16071e-05	0.000215183	6.64047e-06		0	0	0	0		0.000216396	0.000217277	0.000358824	0.000379098		0.000930062	0.000215184	0.000195553	5.96005e-05			9.2634e-05	9.2634e-05	2.28568e-05	2.28568e-05
C15H24N+	218.19	2	3.32471e-06	6.64942e-06	2.33722e-06	4.67444e-06		0.000122923	4.21735e-05	0.000100259	2.73018e-05		5.37425e-05	7.90704e-06	9.19258e-05	4.61311e-05		0.000249963	0.000183033	0.000374448	0.000397579		0.00110451	0.000534267	0.000215142	8.93006e-05			0.000166681	0.000166681	4.23595e-05	4.23595e-05
C8H11O7+	219.05	2	0.000228542	0.000316878	0.00016433	0.000224754		0.000552328	1.82078e-05	0.000442004	2.55403e-05		0.000579282	0.00020553	0.000910053	0.000422084		0.00159436	0.00159801	0.000634759	0.000653799		0.000840369	0.000756401	0.00016147	0.000133671			0.00168745	0.00168745	0.000397659	0.000397659
C12H11O4+	219.065	2	0.000568623	0.00113725	0.000401344	0.000802688		0.00222376	0.000232675	0.00172424	0.00016779		0.00219131	0.0012186	0.00302731	0.000928213		0.00213271	0.00216732	0.00359136	0.00390301		0.00329595	0.00172116	0.000686212	0.000412465			0.00529215	0.00529215	0.00120079	0.00120079
C16H11O+	219.08	2	0.00440837	0.00446982	0.00343196	0.00320188		0.00955882	0.00155983	0.00721398	0.000615242		0.000807376	0.0011866	0.00064612	0.00059587		0.00905544	0.00908646	0.015064	0.0158809		0.00918832	0.00484936	0.00191785	0.00112357			0.0308588	0.0308588	0.00690576	0.00690576
C13H15O3+	219.102	2	0.00282786	0.00565572	0.00199628	0.00399257		0.0493819	0.00757758	0.0383452	0.00335091		0.0159704	0.00972237	0.0206495	0.00381989		0.0215183	0.0216669	0.035957	0.0382983		0.0171131	0.0104477	0.00380936	0.00269322			0.0114123	0.0114123	0.00275075	0.00275075
C10H19O5+	219.123	2	0.000503329	0.00100666	0.000355352	0.000710704		0.0043088	0.000944785	0.00337467	0.00051526		0.00181872	0.000649965	0.0028861	0.00142801		0.00150153	0.00153215	0.00253611	0.00277683		0.00203105	0.000507738	0.000431883	0.000150812			0.0037304	0.0037304	0.00086792	0.00086792
C14H19O2+	219.138	2	0.000311977	0.000623954	0.000220272	0.000440544		0.0216216	0.0024682	0.0172814	0.00139771		0.00554781	0.00216828	0.00838939	0.00335011		0.00367477	0.00369951	0.00614038	0.00653718		0.00650671	0.00281721	0.00143532	0.000774984			0.00512784	0.00512784	0.00125777	0.00125777
C11H23O4+	219.159	2	4.99155e-05	9.98311e-05	3.52464e-05	7.04928e-05		0.00329428	0.000407507	0.00262321	0.000219179		9.07177e-05	6.19969e-05	0.000208856	0.0002023		0.000325021	0.000329452	0.000546516	0.000590971		0.00176111	0.000685024	0.000370931	0.000165762			0.00153487	0.00153487	0.000373655	0.000373655
C15H23O+	219.174	2	5.07924e-05	0.000101585	3.58681e-05	7.17362e-05		0.00859574	0.00121527	0.00682769	0.000648229		0.00190635	0.000461713	0.0030619	0.00132589		0.00224695	0.00133472	0.00317399	0.00303439		0.00457829	0.00148964	0.000944522	0.000267219			0.00257056	0.00257056	0.00066345	0.00066345
C16H27+	219.211	2	5.84592e-06	1.16918e-05	4.1289e-06	8.2578e-06		0.000547842	8.79756e-05	0.000408496	3.38986e-05		0.000172745	8.85001e-05	0.000279128	0.000174301		0.000560056	0.000532325	0.000909116	0.000930088		0.00396553	0.00139995	0.000829338	0.00029158			0.00181157	0.00181157	0.000464548	0.000464548
C14H6NO2+	220.039	2	0.000683023	0.0005842	0.000609856	0.000416639		0.00104653	0.000257752	0.00079834	0.000134543		0.000279151	0.000142829	0.000406843	0.000165641		0.000298015	0.000303602	0.000504937	0.000551277		0.000910307	0.000474847	0.000185214	8.44641e-05			0.0005643	0.0005643	0.000134451	0.000134451
C11H10NO4+	220.06	2	0.000113837	0.000227675	8.0715e-05	0.00016143		0.000312661	6.54789e-05	0.000259304	5.56332e-05		0.000267221	0.000143955	0.00038504	0.000124432		0.000937288	0.000941772	0.00156918	0.00166151		0.00101875	0.000657332	0.000208194	0.000123971			0.00018183	0.00018183	4.65768e-05	4.65768e-05
C15H10NO+	220.076	2	0.000516678	0.000505869	0.000407665	0.000365279		0.00267485	0.000603068	0.00202277	0.000298151		0.000742122	0.00043598	0.00106368	0.000482766		0.00139038	0.00141175	0.00235074	0.00255061		0.00368621	0.000793027	0.000779852	0.000211893			0.00166685	0.00166685	0.00037885	0.00037885
C12H14NO3+	220.097	2	0.000200479	0.000400958	0.000142171	0.000284342		0.00244972	0.000536727	0.00189316	0.000275794		0.000771426	0.000383816	0.00105382	0.000211546		0.00223048	0.00223203	0.00370639	0.00385953		0.00553448	0.00148241	0.00121038	0.000498017			0.000356851	0.000356851	8.63018e-05	8.63018e-05
C9H18NO5+	220.118	2	0.000774468	0.00154894	0.000549271	0.00109854		0.00479408	0.000787378	0.00371425	0.000348663		0.00131636	0.000729259	0.00190041	0.000757402		0.00343402	0.00350301	0.00582547	0.00637507		0.00814769	0.00200099	0.00177721	0.000682522			0.00213681	0.00213681	0.000489937	0.000489937
C13H18NO2+	220.133	2	0.000242774	0.000485547	0.000172193	0.000344386		0.00358771	0.000533995	0.00282597	0.000254763		0.00106771	0.000376637	0.00158923	0.000479808		0.0016709	0.00167639	0.00279239	0.00294236		0.00808176	0.00472366	0.00178708	0.0012275			0.000770309	0.000770309	0.000185726	0.000185726
C10H22NO4+	220.154	2	6.45433e-05	0.000129087	4.57833e-05	9.15666e-05		0.000607593	6.58116e-05	0.000475121	4.95266e-05		1.04434e-05	1.73226e-05	9.61798e-06	1.36798e-05		0.000725874	0.000792088	0.00126753	0.0015151		0.0022611	0.000976519	0.000511268	0.000306019			0.000236173	0.000236173	5.74695e-05	5.74695e-05
C14H22NO+	220.17	2	1.65521e-05	3.31042e-05	1.17419e-05	2.34838e-05		0.000492293	8.00725e-05	0.000395683	4.68068e-05		0.000105462	1.56224e-05	0.000182015	9.90481e-05		0.000353457	0.000353559	0.00058297	0.000598337		0.00148367	0.000440708	0.000314862	0.000109208			0.000149467	0.000149467	3.83673e-05	3.83673e-05
C15H26N+	220.206	2	1.2743e-05	2.54861e-05	9.0413e-06	1.80826e-05		0.000477135	9.31774e-05	0.000369612	4.57535e-05		4.80555e-05	1.47194e-05	7.87759e-05	3.84207e-05		0.000284283	0.000289828	0.000482273	0.000527235		0.00129078	0.000419818	0.000264682	6.60024e-05			0.000232664	0.000232664	5.90901e-05	5.90901e-05
C8H13O7+	221.066	2	0.00159714	0.00210821	0.00116263	0.00151609		0.00459858	0.00153316	0.00356022	0.000891031		0.00142982	0.000772629	0.00318279	0.00320358		0.00234617	0.00248092	0.00406781	0.00468855		0.00614153	0.00389769	0.00123022	0.000650219			0.00776712	0.00776712	0.0018367	0.0018367
C12H13O4+	221.081	2	0.00255992	0.00511984	0.00182353	0.00364707		0.0406838	0.0064641	0.0317495	0.00286281		0.0154715	0.00916888	0.0211227	0.00530596		0.0198389	0.0199426	0.0333872	0.035398		0.012842	0.0115371	0.00289699	0.00284971			0.00994784	0.00994784	0.00245589	0.00245589
C13H17O3+	221.117	2	0	0	0	0		0.00285283	0.00114913	0.00289002	0.00115068		0.0122564	0.00588851	0.0180811	0.00660723		0.00721248	0.00657064	0.0117795	0.0123659		0.00497051	0.0025073	0.00111487	0.000632699			0.000555952	0.000555952	0.000191011	0.000191011
C10H21O5+	221.138	2	0.00717132	0.0143426	0.00510976	0.0102195		0.0405176	0.00579793	0.0312129	0.00208809		0.00955344	0.00458716	0.013688	0.00395242		0.00742679	0.00760078	0.012683	0.0139576		0.00909935	0.00547568	0.00204013	0.00154416			0.0181957	0.0181957	0.0042493	0.0042493
C14H21O2+	221.154	2	0.000106293	0.000212585	7.57416e-05	0.000151483		0.00407696	0.000490862	0.00327131	0.000259614		0.000694339	0.000260472	0.00108108	0.000478316		0.000659097	0.000661732	0.00110778	0.00117008		0.0014527	0.000434669	0.000314174	0.000118402			0.00113338	0.00113338	0.000280834	0.000280834
C15H25O+	221.19	2	1.8111e-06	3.62221e-06	1.29076e-06	2.58152e-06		0.00863567	0.00140758	0.00665678	0.00058647		0.00163465	0.000617182	0.00255532	0.00114197		0.00295254	0.00255344	0.00471863	0.00489616		0.00511176	0.00154952	0.0010819	0.000301027			0.00300913	0.00300913	0.000780332	0.000780332
C16H29+	221.226	2	1.92466e-05	3.84931e-05	1.37192e-05	2.74384e-05		0.000489119	8.6289e-05	0.000385709	4.3464e-05		0.000134808	6.61144e-05	0.000226996	0.00013784		0.000477883	0.000480947	0.000805883	0.000857233		0.00216713	0.000699381	0.000460367	0.00014607			0.000895426	0.000895426	0.000230931	0.000230931
C11H12NO4+	222.076	2	0.00078698	0.00157216	0.000563166	0.00112497		0.00260861	0.00049281	0.00207642	0.00026414		0.00103781	0.000471069	0.00163957	0.000863233		0.00175971	0.00124822	0.00265376	0.00282991		0.0235281	0.0321776	0.00444295	0.00587159			0.00197951	0.00197951	0.00045832	0.00045832
C8H16NO6+	222.097	2	0.00141799	0.00283597	0.00101475	0.00202951		0.00713624	0.00103094	0.0054863	0.00036406		0.0015851	0.000904546	0.0022265	0.000682345		0.0356146	0.035716	0.06001	0.0631338		0.0498767	0.0462955	0.0110681	0.0109464			0.00269554	0.00269554	0.000635262	0.000635262
C12H16NO3+	222.112	2	0.000170304	0.000340609	0.000121883	0.000243767		0.00388742	0.000403779	0.00307933	0.000135009		0.00100401	0.000477472	0.00144229	0.000406671		0.00155052	0.00158185	0.00265444	0.00290545		0.0122496	0.00751041	0.0029068	0.00224832			0.000619257	0.000619257	0.000151625	0.000151625
C9H20NO5+	222.134	2	0.00128029	0.00256059	0.000916368	0.00183274		0.00840353	0.00103667	0.00654436	0.000315149		0.00125004	0.000723846	0.00167523	0.000384378		0.00123697	0.00135968	0.00218465	0.00263184		0.00304675	0.0017835	0.000723998	0.000541912			0.00331324	0.00331324	0.000778436	0.000778436
C13H20NO2+	222.149	2	0	0	0	0		0.00259253	0.00037312	0.00210436	0.0002202		0.000701304	0.000215284	0.00111978	0.000493895		0.000570193	0.000575506	0.000968414	0.00103756		0.00640859	0.00299475	0.00142907	0.000785244			0.000400267	0.000400267	0.000102889	0.000102889
C14H24NO+	222.185	2	6.83087e-05	0.000136617	4.89032e-05	9.78065e-05		0.000830219	0.000160991	0.000674201	9.69867e-05		0.000184148	3.31254e-05	0.000344699	0.00022026		0.000428819	0.000433426	0.000729349	0.000783933		0.00317538	0.000803228	0.000671257	0.000180785			0.000535428	0.000535428	0.000134321	0.000134321
C15H28N+	222.222	2	3.2106e-05	6.42119e-05	2.29889e-05	4.59779e-05		0.00144718	0.000246073	0.00105582	0.000159314		0.000110859	4.98095e-05	0.000185773	0.000109828		0.000751382	0.000737567	0.00126453	0.00136074		0.00363284	0.000850906	0.000767005	0.00013637			0.000206785	0.000206785	5.34806e-05	5.34806e-05
C7H11O8+	223.045	2	0.00281372	0.0043074	0.00204927	0.00309704		0.0311182	0.00860845	0.0239158	0.00470286		0.00268475	0.00116431	0.00567967	0.00504299		0.00162537	0.00115212	0.00219056	0.00187108		0.0202546	0.0226124	0.00411998	0.00428472			0.0216476	0.0216476	0.00508635	0.00508635
C11H11O5+	223.06	2	0.000152672	0.000305345	0.000109733	0.000219466		1.44695e-05	1.80466e-05	1.02878e-05	1.28311e-05		0.000522786	0.000246189	0.00076523	0.000237158		0.000931551	0.000638408	0.00138684	0.00137871		0.000814928	0.00024812	0.000176674	6.18294e-05			0.000701042	0.000701042	0.000167635	0.000167635
C15H11O2+	223.075	2	0.000248528	0.000495909	0.000178662	0.000356447		0.000703307	0.000232691	0.00052128	0.000172042		0.000140437	0.000199847	0.000102286	0.000116824		0.00107573	0.00109526	0.00184719	0.00201458		0.00148606	0.000722953	0.000330698	0.000196043			0.00231611	0.00231611	0.000544018	0.000544018
C12H15O4+	223.096	2	0.000164667	0.000329334	0.000118373	0.000236747		0.00357325	0.000503348	0.00282118	0.000208347		0.00182375	0.00110197	0.00253008	0.000734439		0.00137257	0.00138871	0.00234612	0.00252722		0.00126877	0.000618767	0.00028893	0.000174528			0.000955452	0.000955452	0.000241768	0.000241768
C13H19O3+	223.133	2	0.00025004	0.00050008	0.000179774	0.000359549		0.00351979	0.000581799	0.00290129	0.000377866		0.002591	0.00182629	0.0038138	0.00238066		0.00182402	0.00187217	0.00314845	0.00348134		0.00233129	0.000760605	0.000528698	0.00023847			0.00173925	0.00173925	0.000443538	0.000443538
C10H23O5+	223.154	2	0.0001745	0.000349	0.000125474	0.000250949		0.00645968	0.00102954	0.00509564	0.00046616		0.00093965	0.000446197	0.0014563	0.000743262		0.00052412	0.000560134	0.000921068	0.00107536		0.00103211	0.000283319	0.000226426	8.37377e-05			0.00196088	0.00196088	0.000493876	0.000493876
C14H23O2+	223.169	2	0.000130965	0.00026193	9.41769e-05	0.000188354		0.00419973	0.000616703	0.00336488	0.000306415		0.000795151	0.000246556	0.00122334	0.000382305		0.000795368	0.000799702	0.0013516	0.00143392		0.00158277	0.000372079	0.000344261	9.03078e-05			0.00116276	0.00116276	0.000292419	0.000292419
C15H27O+	223.206	2	1.65294e-05	3.30588e-05	1.18882e-05	2.37765e-05		0.00308034	0.000514202	0.00239353	0.000219603		0.000476916	0.000147498	0.000822318	0.000492134		0.00160502	0.00151706	0.00267138	0.00279318		0.00334914	0.00108758	0.000713332	0.000187644			0.00180834	0.00180834	0.000476807	0.000476807
C16H31+	223.242	2	9.1127e-06	1.82254e-05	6.55509e-06	1.31102e-05		0.000499607	9.00195e-05	0.000391857	4.25783e-05		0.000111673	4.98272e-05	0.000180339	0.000110324		0.000268987	0.000249142	0.000446971	0.000478797		0.00161902	0.000567751	0.000346236	0.000103525			0.00104778	0.00104778	0.000266164	0.000266164
C10H10NO5+	224.055	2	0.000223895	0.000248163	0.000174856	0.000184161		0.000283692	5.78967e-05	0.000216346	2.72603e-05		0.000149038	4.83183e-05	0.000232516	8.84358e-05		0.000256924	0.000263267	0.000444894	0.000490604		0.000583668	9.66162e-05	0.000126937	2.26903e-05			0.000107395	0.000107395	2.5675e-05	2.5675e-05
C7H14NO7+	224.076	2	0.000197791	0.000113989	0.000195092	5.56606e-05		0.000381705	9.39098e-05	0.00030112	5.16343e-05		0.000137646	6.697e-05	0.000207706	8.25853e-05		0.000415519	0.000424452	0.000718244	0.0007879		0.000727528	0.000320002	0.000156505	6.25195e-05			0.00018367	0.00018367	4.39363e-05	4.39363e-05
C11H14NO4+	224.092	2	9.63297e-05	0.000192659	6.95583e-05	0.000139117		0.000900407	0.000119331	0.000710031	4.33022e-05		0.000280409	0.000160746	0.000401877	0.000134077		0.000716702	0.0007218	0.00122528	0.00130575		0.00205379	0.00101881	0.000467828	0.000287915			0.000161364	0.000161364	3.89579e-05	3.89579e-05
C15H14NO+	224.107	2	0.000311576	0.000623151	0.000225	0.00045		0.00172406	0.000302303	0.001367	0.000146791		0.000531337	0.00029247	0.000746565	0.000212555		0.00165948	0.00168054	0.00285159	0.00307767		0.00429435	0.00159757	0.000959008	0.000431805			0.00109702	0.00109702	0.000262414	0.000262414
C12H18NO3+	224.128	2	0.000184721	0.000369442	0.000133406	0.000266812		0.00544546	0.000830971	0.00434199	0.000387179		0.0014028	0.000706531	0.00202893	0.000582315		0.00298603	0.00301553	0.00511946	0.00549204		0.013417	0.00744101	0.00314057	0.00205346			0.000775697	0.000775697	0.000195532	0.000195532
C16H18N+	224.143	2	6.50725e-05	0.000130145	4.69989e-05	9.39977e-05		0.000623634	0.000251953	0.000482981	0.000151924		8.25108e-05	8.85849e-05	7.86206e-05	5.31762e-05		0.00044039	0.000448295	0.000759752	0.000828296		0.00147735	0.000950078	0.000336955	0.000228691			0.000488272	0.000488272	0.000119711	0.000119711
C14H26NO+	224.201	2	3.17467e-05	6.34934e-05	2.29351e-05	4.58702e-05		0.000404494	6.50114e-05	0.000314404	2.64154e-05		8.29992e-05	2.21948e-05	0.000141653	7.33439e-05		0.00057974	0.00060157	0.00101118	0.00113664		0.00351124	0.000950732	0.00075808	0.000177806			0.000363806	0.000363806	9.37672e-05	9.37672e-05
C15H30N+	224.237	2	1.82134e-05	3.64268e-05	1.31602e-05	2.63205e-05		0.000248839	4.71926e-05	0.000192718	2.17244e-05		5.12027e-05	1.4193e-05	8.0566e-05	2.92008e-05		0.000273584	0.000273816	0.000463433	0.000483061		0.00254489	0.000400588	0.000557107	0.000111184			0.000247249	0.000247249	6.40095e-05	6.40095e-05
C10H9O6+	225.039	2	0.000122418	0.000244835	8.87715e-05	0.000177543		0	0	0	0		0.000394647	0.000195421	0.000549613	0.000164657		0.00107143	0.000260988	0.00102842	0.00063711		0.000846742	9.9229e-05	0.000184006	1.24291e-05			0.000689417	0.000689417	0.000164739	0.000164739
C14H9O3+	225.055	2	0.000151521	0.000156845	0.000122687	0.000118091		0	0	0	0		9.36045e-06	1.44562e-05	2.92456e-05	4.8015e-05		0.000240321	0.000244995	0.000416696	0.000455501		0.000288369	0.000110064	6.30663e-05	2.44517e-05			0.000304482	0.000304482	7.28247e-05	7.28247e-05
C11H13O5+	225.076	2	0.00069529	0.000933277	0.000514778	0.000682126		0.00368005	0.000634003	0.00290344	0.000289933		0.00176255	0.00116676	0.00246208	0.000876925		0.00114258	0.00115071	0.00196198	0.00209085		0.00127	0.000462937	0.000278498	0.000113242			0.00186559	0.00186559	0.000457897	0.000457897
C8H17O7+	225.097	2	0.00113216	0.00226432	0.000821201	0.0016424		0.00392775	0.000801213	0.00311295	0.000412012		0.00126693	0.000537432	0.00219624	0.0015402		0.0020505	0.00205332	0.00344547	0.003516		0.00379575	0.0013974	0.000865008	0.000407788			0.00347066	0.00347066	0.000842632	0.000842632
C12H17O4+	225.112	2	0.00318251	0.00636502	0.00230856	0.00461712		0.0404901	0.00663884	0.0324374	0.00324651		0.0154164	0.00886027	0.0224445	0.00849957		0.00940179	0.00953178	0.0162427	0.0175707		0.00971411	0.00276389	0.00221958	0.000883076			0.0135564	0.0135564	0.0034216	0.0034216
C16H17O+	225.127	2	0.00201135	0.0040227	0.00145911	0.00291822		0.0429395	0.00704997	0.0340057	0.00317851		0.00879167	0.00528614	0.0117856	0.00274951		0.00948344	0.00953656	0.0162606	0.0172584		0.011584	0.00427714	0.00268468	0.00136605			0.019128	0.019128	0.0048144	0.0048144
C13H21O3+	225.149	2	0.000240365	0.000480731	0.000174387	0.000348773		0.00744913	0.00141085	0.00605056	0.000795892		0.00245191	0.00103414	0.00387769	0.00180769		0.00174007	0.00176325	0.00300551	0.00324796		0.00278243	0.000639205	0.000621809	0.000200968			0.00314527	0.00314527	0.000804431	0.000804431
C17H21+	225.164	2	9.62637e-05	0.000192527	6.98448e-05	0.00013969		0.026635	0.00346625	0.0218656	0.00201213		0.00266858	0.00105309	0.00406872	0.00173874		0.00130614	0.00131856	0.00224898	0.00241062		0.00376956	0.00129924	0.000844155	0.00034543			0.00508049	0.00508049	0.0013398	0.0013398
C14H25O2+	225.185	2	5.54806e-05	0.000110961	4.02581e-05	8.05162e-05		0.0041385	0.000517983	0.00332954	0.000222113		0.000331714	9.74888e-05	0.000517008	0.000162588		0.000882682	0.000887055	0.00151266	0.00160248		0.00135656	0.000191881	0.000297338	4.87357e-05			0.00142853	0.00142853	0.000372428	0.000372428
C15H29O+	225.221	2	5.54928e-05	0.000110986	4.02735e-05	8.0547e-05		0.00126014	0.000259379	0.00100118	0.000134979		0.000375565	0.000103111	0.000617322	0.000280384		0.00329041	0.00329945	0.00562165	0.00591202		0.00331712	0.000763351	0.000719143	0.000121287			0.00194889	0.00194889	0.000516238	0.000516238
C15H31N+	225.245	2	1.09852e-05	2.19704e-05	7.97326e-06	1.59465e-05		0.000235464	5.55561e-05	0.0002032	4.18645e-05		5.6772e-05	2.78931e-05	0.000111615	8.96304e-05		0.00018185	0.000195291	0.000323152	0.000379427		0.00116709	0.000676827	0.000242049	0.000137352			0.0010335	0.0010335	0.000262167	0.000262167
C16H33+	225.258	2	0	0	0	0		0.000737875	0.000149514	0.000580094	7.4299e-05		0.00015856	8.03204e-05	0.000249096	0.000136832		0.000484679	0.00049243	0.000839209	0.00091163		0.00256447	0.00107048	0.00056305	0.000220058			0.00217508	0.00217508	0.000550505	0.000550505
C13H8NO3+	226.05	2	5.80797e-05	7.52577e-05	4.32957e-05	5.54855e-05		2.62569e-05	6.46387e-06	2.00201e-05	4.82138e-06		5.31301e-05	1.97731e-05	7.91277e-05	2.67916e-05		0.000218573	0.000218776	0.000369269	0.000377512		0.000466186	9.82925e-05	0.000101604	1.50123e-05			0.000114277	0.000114277	2.77821e-05	2.77821e-05
C10H12NO5+	226.071	2	0.00111492	0.000641341	0.00118029	0.000421474		0.000983557	0.00020135	0.000762442	9.66927e-05		0.000400743	0.000237898	0.000591637	0.000253809		0.000470365	0.000473565	0.000811003	0.000863573		0.00126951	0.000490071	0.00027793	9.36389e-05			0.000531258	0.000531258	0.000125759	0.000125759
C14H12NO2+	226.086	2	0.000588827	0.000390878	0.000564869	0.000289901		0.00035366	8.43187e-05	0.000270786	4.32958e-05		7.22904e-05	6.37855e-05	8.29453e-05	2.05477e-05		0.000513904	0.000520062	0.000890402	0.000959584		0.00159652	0.00084989	0.0003469	0.00015758			0.000937583	0.000937583	0.000222614	0.000222614
C11H16NO4+	226.107	2	7.33646e-05	0.000146729	5.34542e-05	0.000106908		0.00102229	0.000101862	0.000818853	2.44948e-05		0.000270563	0.000210693	0.000362744	0.000134355		0.000518936	0.00052132	0.000871019	0.000882159		0.00273463	0.00125483	0.000650836	0.000386566			0.00032201	0.00032201	7.87801e-05	7.87801e-05
C15H16NO+	226.123	2	7.99152e-05	0.00015983	5.8231e-05	0.000116462		0.00118616	0.000221248	0.000961334	0.000120188		0.000367203	0.000109365	0.000601241	0.000254381		0.00196568	0.00200284	0.00342337	0.0037386		0.00336054	0.00132342	0.000758622	0.000358477			0.000794271	0.000794271	0.000199817	0.000199817
C12H20NO3+	226.144	2	6.5251e-05	0.000130502	4.75503e-05	9.51005e-05		0.00222592	0.00033901	0.00176643	0.000141537		0.000631703	0.000422517	0.000899841	0.000392288		0.00146417	0.00147192	0.00252095	0.00267325		0.0070989	0.0038756	0.00168363	0.00109511			0.000315488	0.000315488	7.92232e-05	7.92232e-05
C16H20N+	226.159	2	0	0	0	0		0.00172878	0.00028964	0.00149456	0.000241731		0.000323119	0.000113476	0.000535463	0.000235031		0.000679596	0.000707252	0.00119739	0.00135151		0.00218019	0.000528998	0.000493033	0.000168259			0.000429162	0.000429162	0.000110552	0.000110552
C13H24NO2+	226.18	2	8.9763e-06	1.79526e-05	6.54234e-06	1.30847e-05		0.00130825	2.64383e-05	0.00109875	8.2083e-05		0.000182013	5.85539e-05	0.000296392	0.000132354		0.00038843	0.000390954	0.000669831	0.000712677		0.00256474	0.00090806	0.000580021	0.000260741			0.000242301	0.000242301	6.40132e-05	6.40132e-05
C14H28NO+	226.217	2	5.53927e-06	1.10785e-05	4.03792e-06	8.07585e-06		0.000186463	3.88373e-05	0.000142146	2.85906e-05		6.58375e-05	2.08726e-05	0.000115526	6.27266e-05		0.00107438	0.000716867	0.00161247	0.00155367		0.00507326	0.00133033	0.00113041	0.000301353			0.000447681	0.000447681	0.000118758	0.000118758
C15H32N+	226.253	2	1.7342e-06	3.46841e-06	1.26438e-06	2.52875e-06		5.2512e-05	1.68968e-05	4.22263e-05	1.27868e-05		2.67007e-05	3.97787e-06	4.90662e-05	2.45254e-05		0.00013352	0.000125766	0.00022242	0.000225705		0.00249946	0.000637163	0.000553512	0.000134339			0.000152945	0.000152945	3.85981e-05	3.85981e-05
C9H7O7+	227.019	2	7.43554e-05	0.000148711	5.43954e-05	0.000108791		0.000247055	2.11014e-05	0.000210201	2.08752e-05		7.22066e-05	5.56703e-05	0.000131521	9.77058e-05		0.000445566	9.64353e-05	0.000484309	0.000361373		0.000470382	6.61937e-05	0.000106416	2.44038e-05			0.000148496	0.000148496	3.52667e-05	3.52667e-05
C6H11O9+	227.04	2	0	0	0	0		0	0	0	0		0	0	0	0		8.99515e-06	1.55801e-05	2.92473e-06	5.06578e-06		0.00017436	0.000278068	3.51505e-05	5.3279e-05			4.85103e-06	4.85103e-06	1.72773e-06	1.72773e-06
C10H11O6+	227.055	2	0.00106537	0.000716402	0.0010203	0.000449218		0.00225831	0.000501145	0.00175969	0.00025307		0.000891654	0.000565426	0.00125661	0.000415413		0.000909432	0.000797734	0.00150331	0.00155862		0.000606043	0.000322928	0.000132522	7.67036e-05			0.0017519	0.0017519	0.000418158	0.000418158
C7H15O8+	227.076	2	0.00153932	0.00115764	0.0013803	0.000812105		0.00312342	0.000512879	0.00243376	0.000209224		0.000737742	0.000382378	0.0011021	0.000441234		0.00294308	0.00298301	0.00512807	0.00554449		0.00309312	0.00199273	0.000697221	0.000478665			0.00387646	0.00387646	0.000918278	0.000918278
C11H15O5+	227.091	2	0.000742657	0.00148531	0.000543473	0.00108695		0.00882335	0.00180697	0.00703947	0.000931303		0.00469238	0.00290454	0.00690921	0.00306997		0.00332167	0.00234367	0.00511977	0.00509402		0.00373959	0.00173136	0.000790811	0.000280205			0.00385266	0.00385266	0.000960224	0.000960224
C15H15O2+	227.107	2	0.00254636	0.00509272	0.00186354	0.00372708		0.0218538	0.00340867	0.0172642	0.00138219		0.00646134	0.00386169	0.00879631	0.00177888		0.015872	0.0159786	0.0274899	0.0292653		0.0107932	0.0112386	0.00260067	0.00297062			0.00555582	0.00555582	0.00137514	0.00137514
C12H19O4+	227.128	2	0.000515939	0.00103188	0.000377622	0.000755245		0.00743673	0.00140448	0.00595898	0.000708026		0.00259316	0.00132775	0.00398743	0.0017922		0.00157203	0.00162267	0.00277067	0.00309059		0.00309063	0.000425559	0.000709131	0.00020214			0.00255013	0.00255013	0.000645472	0.000645472
C16H19O+	227.143	2	0.000804655	0.00160931	0.000588977	0.00117795		0.0175213	0.00249464	0.0142015	0.00116179		0.00373467	0.00189862	0.00530872	0.00126243		0.00534061	0.00538615	0.00926839	0.00991175		0.0057133	0.00207944	0.00132427	0.000614493			0.00408212	0.00408212	0.00104783	0.00104783
C13H23O3+	227.164	2	4.7456e-05	9.4912e-05	3.47393e-05	6.94785e-05		0.00248471	0.000413534	0.00207221	0.000260641		0.000477073	8.48609e-05	0.000928167	0.000594328		0.000402057	0.00041833	0.000711486	0.000802824		0.00236676	0.00066631	0.000520499	0.000143046			0.00124314	0.00124314	0.000326338	0.000326338
C17H23+	227.179	2	0	0	0	0		0.0120865	0.000724136	0.0105131	0.00125811		0.00187298	0.000472662	0.00310652	0.00124023		0.00117018	0.000719582	0.00171538	0.00161764		0.0046193	0.00117905	0.00103454	0.000271396			0.00329679	0.00329679	0.000891018	0.000891018
C14H27O2+	227.201	2	0.000174086	0.000348172	0.000127457	0.000254914		0.00364961	0.000383367	0.00301607	0.000213523		0.00030746	0.000136645	0.000438019	7.74511e-05		0.00263003	0.00264943	0.00456021	0.00486297		0.00129537	0.000278153	0.000292907	7.90629e-05			0.00163293	0.00163293	0.000430094	0.000430094
C14H29NO+	227.224	2	7.42782e-05	0.000148556	5.43884e-05	0.000108777		0.000176953	8.86159e-05	0.000141611	5.6578e-05		0.000243504	9.46199e-05	0.000505666	0.00040565		0.000278979	0.000279299	0.000479301	0.000500473		0.00072233	0.00036527	0.000157676	8.14731e-05			0.000650838	0.000650838	0.000173443	0.000173443
C15H31O+	227.237	2	1.17928e-05	2.35856e-05	8.63547e-06	1.72709e-05		0.0015843	0.000290181	0.00129788	0.000163176		0.00053157	0.000177082	0.000886859	0.000465766		0.00164961	0.000609223	0.00136858	0.000476177		0.00151549	0.000472414	0.000340941	0.000112443			0.000743301	0.000743301	0.000197682	0.000197682
C9H10NO6+	228.05	2	3.14178e-05	6.28356e-05	2.30889e-05	4.61778e-05		0.000590391	0.000128295	0.000466845	6.56959e-05		0.000267179	0.000191359	0.000386509	0.000186813		0.000197309	0.000198709	0.000343298	0.000365825		0.000599717	0.000543677	0.000127718	0.000101708			0.000213961	0.000213961	5.38536e-05	5.38536e-05
C6H14NO8+	228.071	2	0.000307935	0.000263477	0.000265408	0.000186737		0.000554974	0.00011666	0.000441921	5.9879e-05		0.0002052	8.72046e-05	0.00031699	0.000119811		0.00115629	0.00116162	0.00200617	0.0021231		0.00109669	0.000453382	0.000244936	0.000108509			0.000500856	0.000500856	0.000120496	0.000120496
C10H14NO5+	228.087	2	0.000255579	0.000239957	0.000225351	0.0001627		0.00107506	0.000182483	0.000845206	7.78683e-05		0.000393221	0.00028829	0.000550868	0.000239127		0.000768442	0.000772372	0.0013342	0.00141409		0.00115255	0.000609434	0.000268344	0.000177219			0.000293691	0.000293691	7.2661e-05	7.2661e-05
C11H18NO4+	228.123	2	0	0	0	0		0.00515509	0.000716874	0.0041445	0.000285708		0.000901158	0.000761458	0.0010984	0.000235741		0.00206616	0.00207421	0.00358212	0.00378236		0.0103584	0.00624384	0.00255397	0.0017822			0.000543699	0.000543699	0.00013966	0.00013966
C15H18NO+	228.138	2	0.00013837	0.00027674	0.000101727	0.000203455		0.00157888	0.000298535	0.00127336	0.00015275		0.000517596	0.000187067	0.000828923	0.000340619		0.00184424	0.00185364	0.00320271	0.0033943		0.00323706	0.000747271	0.000746674	0.000255474			0.000404852	0.000404852	0.000104287	0.000104287
C12H22NO3+	228.159	2	3.24865e-05	6.49731e-05	2.38858e-05	4.77716e-05		0.00182802	0.000207806	0.00145285	4.8575e-05		0.00062012	0.000293516	0.000978194	0.000458714		0.00158514	0.00160456	0.00277235	0.00298943		0.00851207	0.00207186	0.00195695	0.000597311			0.000629652	0.000629652	0.000162595	0.000162595
C16H22N+	228.175	2	0	0	0	0		0.000747758	0.000182007	0.000664341	0.000147187		0.000171979	4.71052e-05	0.000309233	0.000148172		0.000326637	0.000333644	0.000574965	0.000630675		0.00145208	0.000212995	0.00032976	7.13524e-05			0.000363784	0.000363784	9.5596e-05	9.5596e-05
C13H26NO2+	228.196	2	2.45229e-05	4.90459e-05	1.80334e-05	3.60669e-05		0.000360765	1.4753e-05	0.000301465	2.19378e-05		3.35412e-05	2.40476e-05	4.98567e-05	3.18097e-05		0.00053274	0.000533259	0.000918768	0.000958408		0.000816888	0.000283524	0.000188433	7.31416e-05			0.000140863	0.000140863	3.75366e-05	3.75366e-05
C14H30NO+	228.232	2	0	0	0	0		0.000266252	6.30738e-05	0.000213574	3.47164e-05		4.85164e-05	4.79344e-06	8.68888e-05	4.42776e-05		0.000514449	0.000526677	0.000907035	0.000998745		0.00133483	0.000292613	0.000294115	4.20734e-05			0.00025514	0.00025514	6.90188e-05	6.90188e-05
C9H9O7+	229.034	2	0.000784825	0.000440678	0.000858423	0.000383043		0.00107073	0.000318924	0.000826117	0.000179788		0.000346235	0.000199762	0.000506712	0.000174557		0.000409866	0.000414813	0.000719494	0.000775538		0.000390984	0.000312222	8.36464e-05	5.78446e-05			0.0011748	0.0011748	0.000279252	0.000279252
C10H13O6+	229.071	2	0.000760343	0.000975865	0.000574854	0.000730271		0.00497175	0.00100785	0.00393491	0.000494938		0.00227089	0.00134005	0.00341668	0.00151026		0.00219006	0.00161357	0.00344663	0.00343876		0.00187649	0.00104843	0.00043062	0.000276581			0.002174	0.002174	0.000545233	0.000545233
C14H13O3+	229.086	2	0.00191407	0.0020086	0.00153836	0.00148389		0.00648117	0.00101471	0.00510275	0.000398842		0.00171139	0.00121752	0.00219723	0.000381591		0.00774758	0.00781138	0.0135572	0.0144881		0.00529168	0.00421376	0.00125752	0.00116277			0.00286674	0.00286674	0.00070224	0.00070224
C11H17O5+	229.107	2	0.000754271	0.00150854	0.000556893	0.00111379		0.00631034	0.00131933	0.00508928	0.000697446		0.00225985	0.000922087	0.00372084	0.00187624		0.00310124	0.00312545	0.00542496	0.00579136		0.00385047	0.00103188	0.000860614	0.000166785			0.00325882	0.00325882	0.000811344	0.000811344
C15H17O2+	229.122	2	0.00213638	0.00427275	0.00157743	0.00315487		0.0268219	0.00393364	0.0216696	0.00167132		0.00846772	0.0045967	0.0119725	0.00268472		0.0128287	0.0129716	0.0225114	0.0242171		0.0104732	0.0083836	0.00255609	0.00232886			0.00525642	0.00525642	0.0013392	0.0013392
C12H21O4+	229.143	2	0.000227867	0.000455735	0.000168266	0.000336531		0.00230154	0.000329578	0.00188618	0.00015928		0.000577382	0.000212888	0.000977859	0.000555193		0.000715315	0.000722462	0.00125408	0.00134569		0.00129543	0.0003328	0.000297397	8.46423e-05			0.000934613	0.000934613	0.00024126	0.00024126
C16H21O+	229.159	2	0.0004045	0.000809001	0.000298718	0.000597436		0.0129996	0.00176194	0.0106899	0.000860116		0.00287661	0.00119457	0.0043504	0.00123143		0.00375221	0.00380757	0.006604	0.00715696		0.00465611	0.00198361	0.00109786	0.000548687			0.00312594	0.00312594	0.000824778	0.000824778
C13H25O3+	229.18	2	0.000103008	0.000206016	7.60771e-05	0.000152154		0.00222694	0.000391642	0.00186224	0.000238705		0.000168437	0.000117341	0.000406624	0.000351106		0.00027576	0.000279456	0.000465046	0.000467014		0.00134493	0.000503891	0.000299547	0.00011318			0.00114362	0.00114362	0.000304604	0.000304604
C17H25+	229.195	2	0	0	0	0		0.00352476	0.00043001	0.00329596	0.000685917		0.000901977	0.000244606	0.00154329	0.000667646		0.000661886	0.000281126	0.000892873	0.000792302		0.00218455	0.00078502	0.000490082	0.000143632			0.00177139	0.00177139	0.00048418	0.00048418
C14H29O2+	229.216	2	0.000125645	0.000211278	9.36141e-05	0.00015592		0.00142775	5.43385e-05	0.00121987	9.72141e-05		8.63495e-05	7.06429e-05	0.000112916	5.34542e-05		0.00146094	0.00149237	0.00258351	0.00283414		0.000474418	6.5055e-05	0.000110689	3.08249e-05			0.00076101	0.00076101	0.000204166	0.000204166
C9H12NO6+	230.066	2	0.000496082	0.000318828	0.000470005	0.00021683		0.00235328	0.00046303	0.00185931	0.000221311		0.000853943	0.000619045	0.00122209	0.000574067		0.000527285	0.000531898	0.000927105	0.000991985		0.00206624	0.00138924	0.000455561	0.000258266			0.000625134	0.000625134	0.00015611	0.00015611
C13H12NO3+	230.081	2	0.000583557	0.000627789	0.000466319	0.000470315		0.000996198	0.000196791	0.000807023	0.000101855		0.000446623	0.000161765	0.000715989	0.000284135		0.00282606	0.00285759	0.00497999	0.00535749		0.00311566	0.00127698	0.000715213	0.000352309			0.000351254	0.000351254	8.84174e-05	8.84174e-05
C10H16NO5+	230.102	2	0.000155563	0.000311127	0.000115356	0.000230713		0.00232133	0.000410118	0.00184467	0.000183662		0.000659328	0.000420784	0.000948716	0.000354212		0.00265003	0.00267539	0.00466375	0.00499968		0.0048477	0.00195437	0.00113851	0.000582655			0.00069508	0.00069508	0.000169543	0.000169543
C14H16NO2+	230.118	2	0.0002408	0.000481599	0.000178575	0.000357149		0.00132445	0.000238208	0.00109021	0.000128449		0.000541519	0.00025347	0.000826928	0.000266912		0.00208537	0.00211155	0.00367955	0.00397012		0.00310003	0.00133957	0.000743143	0.000403643			0.000316699	0.000316699	7.97351e-05	7.97351e-05
C11H20NO4+	230.139	2	3.77308e-05	7.54616e-05	2.79834e-05	5.59668e-05		0.00149112	0.000200435	0.00119399	6.78089e-05		0.000218878	0.000143326	0.000312866	0.000117042		0.000892371	0.000894277	0.00153065	0.00155822		0.00314307	0.00104177	0.00076299	0.000363387			0.000282984	0.000282984	7.11783e-05	7.11783e-05
C15H20NO+	230.154	2	5.37229e-05	0.000107446	3.98467e-05	7.96933e-05		0.00117128	0.000170679	0.000975749	9.47875e-05		0.000344465	0.000132785	0.000546703	0.000199799		0.00130245	0.00133503	0.00231744	0.00255685		0.00234536	0.000876475	0.000556888	0.00025985			0.00031964	0.00031964	8.58005e-05	8.58005e-05
C16H24N+	230.19	2	7.68553e-06	1.53711e-05	5.70132e-06	1.14026e-05		0.000608374	7.63379e-05	0.0005413	8.19189e-05		0.000116827	1.86798e-05	0.000207866	9.46085e-05		0.000436118	0.000441952	0.000770254	0.000832485		0.00165566	0.000326828	0.000377807	8.2246e-05			0.000228647	0.000228647	6.03302e-05	6.03302e-05
C13H28NO2+	230.211	2	0	0	0	0		0.000170818	2.51196e-05	0.000136103	9.40167e-06		1.05983e-05	6.76014e-06	1.42262e-05	6.34547e-06		0.000338309	0.000338492	0.00058779	0.000611379		0.00153861	0.00016005	0.000351542	3.64009e-05			9.0193e-05	9.0193e-05	2.40561e-05	2.40561e-05
C5H11O10+	231.035	2	0.000759138	0.000456478	0.000840833	0.0003572		0.000813691	0.000218038	0.000644743	0.000121339		0.000329202	0.000183177	0.000556828	0.000390294		0.000265772	0.000129096	0.000366116	0.000368734		0.000235645	0.000353528	4.84897e-05	6.9772e-05			0.00103782	0.00103782	0.000254604	0.000254604
C10H15O6+	231.086	2	0.000980719	0.00196144	0.000730367	0.00146073		0.0112434	0.00240477	0.00905042	0.0012527		0.0051538	0.00281469	0.00809743	0.00410356		0.00874853	0.0061499	0.0135987	0.0130665		0.00423363	0.00244782	0.000910766	0.000458028			0.00513519	0.00513519	0.0013152	0.0013152
C14H15O3+	231.102	2	0.00079312	0.00158624	0.000590696	0.00118139		0.00689267	0.00102697	0.00553684	0.000400681		0.00219173	0.00143021	0.00294927	0.000536743		0.00704075	0.00711148	0.0124503	0.0133614		0.00496069	0.00457048	0.00122296	0.00127739			0.00240181	0.00240181	0.000597576	0.000597576
C11H19O5+	231.123	2	0.000326274	0.000652548	0.000243023	0.000486046		0.00259259	0.000544739	0.00210442	0.000288726		0.000787158	0.000266291	0.00138658	0.000830925		0.0017847	0.00180296	0.00315673	0.00338917		0.00196074	0.000327412	0.000468216	0.000154295			0.00222781	0.00222781	0.00054228	0.00054228
C15H19O2+	231.138	2	0.000433536	0.000867072	0.000322938	0.000645876		0.0166582	0.00259243	0.0137199	0.00127702		0.00532706	0.00248852	0.00789462	0.00196822		0.00528148	0.00532871	0.00933139	0.00998894		0.00578325	0.00281225	0.00143177	0.000845213			0.00317225	0.00317225	0.000830439	0.000830439
C12H23O4+	231.159	2	0.000131694	0.000263388	9.81069e-05	0.000196214		0.00280735	0.000433482	0.00232193	0.000220603		0.000198304	4.72654e-05	0.000352572	0.000191898		0.00042304	0.000423116	0.00073674	0.000763651		0.00141583	0.000288334	0.000334634	9.75285e-05			0.00105826	0.00105826	0.000270465	0.000270465
C16H23O+	231.174	2	0.000158266	0.000316533	0.00011791	0.00023582		0.00533405	0.000709516	0.00446126	0.000384654		0.00134287	0.000411249	0.00216682	0.000758876		0.00134681	0.00136758	0.00239253	0.00259619		0.00253713	0.000725716	0.000591449	0.000172887			0.00186267	0.00186267	0.000502052	0.000502052
C13H27O3+	231.195	2	5.318e-05	0.00010636	3.96233e-05	7.92467e-05		0.00105953	0.000108757	0.000881592	4.82917e-05		1.6373e-05	2.61429e-05	4.48804e-05	6.86675e-05		0.000489861	0.000502339	0.000875792	0.000966982		0.00135539	0.000603238	0.000304218	0.00011661			0.00098691	0.00098691	0.000263584	0.000263584
C17H27+	231.211	2	0	0	0	0		0.00119685	0.000156837	0.00106887	0.000163553		0.000391975	0.000111198	0.00070205	0.000353578		0.000566002	0.000405062	0.000887459	0.00090795		0.00208894	0.000868395	0.000476271	0.000163701			0.00132721	0.00132721	0.000366917	0.000366917
C14H31O2+	231.232	2	1.34986e-05	2.69972e-05	1.00591e-05	2.01183e-05		0.00047501	6.65496e-05	0.000410105	5.05119e-05		7.13218e-05	5.20528e-05	0.0001143	9.82112e-05		0.00012051	0.000121811	5.0023e-05	5.0727e-05		0.000878156	0.000225412	0.000205475	6.20032e-05			0.000837293	0.000837293	0.00022683	0.00022683
C15H6NO2+	232.039	2	0.000370135	0.000387333	0.000314384	0.000306022		0.00160693	0.000405921	0.00127699	0.000221495		0.00036463	0.000225406	0.000552509	0.000256261		0.000380961	0.000380998	0.000665581	0.000689074		0.000914758	0.000349388	0.000205522	5.6752e-05			0.000433784	0.000433784	0.000111088	0.000111088
C12H10NO4+	232.06	2	6.54521e-05	0.000130904	4.89502e-05	9.79005e-05		0.000243697	2.23225e-05	0.000208619	1.69169e-05		0.000157103	7.29649e-05	0.000245253	0.000100376		0.000473487	0.000474263	0.000831851	0.000870772		0.000469896	0.000253655	0.000104241	5.39528e-05			0.000151043	0.000151043	3.89703e-05	3.89703e-05
C9H14NO6+	232.082	2	0.00043573	0.000426134	0.00036491	0.000328662		0.00166039	0.000374182	0.00133153	0.000196971		0.000475745	0.00029498	0.000706637	0.000291714		0.00140171	0.00141002	0.00247895	0.0026335		0.00242727	0.000927217	0.000564198	0.000233945			0.000856425	0.000856425	0.000213095	0.000213095
C10H18NO5+	232.118	2	0.000147774	0.000295547	0.000110544	0.000221089		0.00105107	0.000198465	0.000845352	9.51298e-05		0.000172309	0.000153224	0.000222299	7.87687e-05		0.000836964	0.00083719	0.00146447	0.00151956		0.00157588	0.000623587	0.000385338	0.000182968			0.000714541	0.000714541	0.000172841	0.000172841
C14H18NO2+	232.133	2	0.000165832	0.000331665	0.000124062	0.000248123		0.00325742	0.000443727	0.00267924	0.000187418		0.000932527	0.000432394	0.00142539	0.000455695		0.00352724	0.00357108	0.00627782	0.0067719		0.0071029	0.00341722	0.00177254	0.0010588			0.000539069	0.000539069	0.000138508	0.000138508
C15H22NO+	232.17	2	5.79666e-05	0.000115933	4.33724e-05	8.67449e-05		0.00145306	0.000203275	0.00121839	0.000109915		0.000238382	7.89545e-05	0.000390844	0.000157082		0.00113264	0.00114299	0.0020105	0.00215315		0.00348138	0.00120664	0.000833771	0.000372135			0.000382572	0.000382572	0.000100581	0.000100581
C12H26NO3+	232.191	2	1.2211e-06	2.44219e-06	9.13746e-07	1.82749e-06		9.29745e-05	1.84757e-05	6.91641e-05	1.3242e-05		1.30122e-06	2.90961e-06	2.75203e-06	6.15373e-06		0.000246672	0.000248284	0.000436748	0.000464732		0.00067103	0.000227915	0.000162765	6.92347e-05			9.0028e-05	9.0028e-05	2.36168e-05	2.36168e-05
C16H26N+	232.206	2	0	0	0	0		0.000164597	6.46306e-06	0.000143158	1.24155e-05		3.24724e-05	1.29345e-05	6.24293e-05	4.68661e-05		0.000152134	0.00016349	0.000278806	0.000327617		0.000794279	0.000296686	0.000177927	5.59415e-05			0.000124607	0.000124607	3.48177e-05	3.48177e-05
C9H13O7+	233.066	2	0.00187515	0.00181651	0.00160514	0.00135289		0.00492228	0.00115763	0.00393401	0.000616387		0.00212378	0.00102801	0.00347765	0.00186253		0.00254449	0.0014763	0.00380715	0.00365612		0.00236488	0.00126252	0.000543081	0.000293593			0.00421739	0.00421739	0.00107958	0.00107958
C13H13O4+	233.081	2	0.00304033	0.00174019	0.0030615	0.000989953		0.0052886	0.000828469	0.0042199	0.000330258		0.00152391	0.00118471	0.00193998	0.000352768		0.0069357	0.00698041	0.0123262	0.0131128		0.00497017	0.00326548	0.00118733	0.000903838			0.00453803	0.00453803	0.00110263	0.00110263
C10H17O6+	233.102	2	0.00109545	0.00186064	0.000829672	0.00139644		0.00413995	0.000795354	0.00338872	0.000406445		0.00146291	0.000433005	0.00268921	0.00174969		0.00453894	0.0045897	0.00810403	0.00871887		0.00517518	0.00237643	0.00117899	0.000436664			0.00702555	0.00702555	0.00170211	0.00170211
C14H17O3+	233.117	2	0.00321971	0.00643942	0.00241897	0.00483793		0.0333509	0.00493946	0.0272753	0.00206058		0.0112038	0.0063	0.0160601	0.00369191		0.0235766	0.0237462	0.0419408	0.0447046		0.0165204	0.0146021	0.00417703	0.00415453			0.00836068	0.00836068	0.00213904	0.00213904
C11H21O5+	233.138	2	0.00124043	0.00209284	0.000939933	0.001571		0.00712851	0.00117059	0.00574545	0.000499446		0.00115222	0.000511313	0.00182101	0.00071566		0.0049016	0.00496445	0.00876458	0.00946202		0.00484826	0.00323364	0.00119912	0.000961855			0.00411025	0.00411025	0.00101084	0.00101084
C15H21O2+	233.154	2	0.000175857	0.000351713	0.000132142	0.000264283		0.0132101	0.00187898	0.0111085	0.00101003		0.00320819	0.00138599	0.00499567	0.00163821		0.00274948	0.00276245	0.00487782	0.00516378		0.00382564	0.00152096	0.000947843	0.000480377			0.00231113	0.00231113	0.000611254	0.000611254
C12H25O4+	233.175	2	0.000142517	0.000285033	0.000107099	0.000214198		0.00170146	0.000204165	0.0014194	8.95894e-05		2.65741e-06	3.81513e-06	8.34155e-06	1.24971e-05		0.00042023	0.0004528	0.000774079	0.000912367		0.00132976	0.000151794	0.000315767	6.09043e-05			0.000879698	0.000879698	0.000227385	0.000227385
C16H25O+	233.19	2	9.00333e-05	0.000180067	6.76632e-05	0.000135326		0.00509722	0.000714695	0.00429775	0.000393434		0.0010089	0.0002565	0.00167564	0.000583257		0.00165593	0.00084801	0.00238313	0.00212936		0.00445919	0.000863424	0.00104001	0.00016507			0.00244483	0.00244483	0.000662894	0.000662894
C13H29O3+	233.211	2	0.00013283	0.000265659	9.98353e-05	0.000199671		0.0012777	0.000248581	0.00104357	0.000126602		0.000147208	1.23274e-05	0.000270554	0.000129521		0.000683282	0.000689953	0.00121903	0.00130741		0.00108586	0.000459621	0.000246635	8.64412e-05			0.00109059	0.00109059	0.000289224	0.000289224
C17H29+	233.226	2	0	0	0	0		0.000762326	9.33939e-05	0.000669705	8.1942e-05		0.000157449	6.95007e-05	0.000279038	0.000179735		0.000202929	0.000208353	0.000366259	0.000405191		0.00160404	0.000631054	0.000373597	0.000124306			0.00122938	0.00122938	0.00034313	0.00034313
C15H8NO2+	234.055	2	0.00174004	0.00118726	0.00182609	0.000897962		0.00265999	0.000503699	0.00214583	0.000240455		0.000472009	0.000255095	0.000711244	0.000276112		0.00382054	0.00385424	0.00683496	0.00731452		0.00441413	0.0016571	0.00105335	0.000473377			0.00135527	0.00135527	0.000341944	0.000341944
C9H16NO6+	234.097	2	0.000319279	0.000638558	0.000240887	0.000481773		0.00255343	0.00043038	0.00207967	0.000193697		0.000977701	0.000599704	0.00148285	0.000673881		0.00338085	0.00341007	0.00604842	0.00647005		0.00491754	0.00281474	0.00115378	0.000728805			0.00157392	0.00157392	0.000384468	0.000384468
C13H16NO3+	234.112	2	0.00012942	0.000258839	9.76499e-05	0.0001953		0.00115346	0.000265575	0.000958558	0.000152981		0.000470874	0.000195142	0.000732715	0.000229245		0.00172175	0.00172216	0.0030381	0.00315134		0.00479099	0.00233113	0.00117793	0.000704276			0.000205684	0.000205684	5.53659e-05	5.53659e-05
C10H20NO5+	234.134	2	0.00231373	0.00193613	0.00207443	0.00140035		0.00206857	0.000313218	0.00167566	0.000123398		0.000435494	0.00028114	0.000657943	0.000304715		0.00229271	0.0023084	0.00409488	0.0043608		0.00332103	0.00124916	0.000802708	0.000400877			0.000603961	0.000603961	0.000148002	0.000148002
C15H24NO+	234.185	2	5.21477e-05	0.000104295	3.93588e-05	7.87176e-05		0.000767915	6.07748e-05	0.000643627	1.63933e-05		0.000123197	2.91659e-05	0.000214182	9.78349e-05		0.000537441	0.000549931	0.000972098	0.00106946		0.0022423	0.000766892	0.0005331	0.000179155			0.000163149	0.000163149	4.41098e-05	4.41098e-05
C16H28N+	234.222	2	6.61972e-06	1.32394e-05	4.99706e-06	9.99411e-06		0.000184964	4.43381e-05	0.000156004	2.70973e-05		3.08544e-05	3.44576e-06	5.84124e-05	2.90959e-05		0.000326379	0.000331712	0.000587848	0.000638995		0.00131084	0.000387931	0.000306586	7.2319e-05			0.000169418	0.000169418	4.5355e-05	4.5355e-05
C8H11O8+	235.045	2	0.000530441	0.000452932	0.000479516	0.000355479		0.000832609	0.000213846	0.000662646	0.000117791		0.000382132	0.000129777	0.000640086	0.000274613		0.000181528	0.000164282	0.000310193	0.000316981		0.000446894	0.00040015	0.000100075	8.03378e-05			0.000919677	0.000919677	0.000228808	0.000228808
C12H11O5+	235.06	2	0.000750268	0.000476056	0.000749834	0.000325255		0.000838491	0.00010215	0.000676159	3.13021e-05		0.000415397	0.000302793	0.000542922	8.24142e-05		0.000640728	0.000642649	0.0011432	0.00120337		0.000542741	0.000351604	0.000125711	8.05657e-05			0.000522978	0.000522978	0.000130846	0.000130846
C16H11O2+	235.075	2	0.0010221	0.000701383	0.00120757	0.00060411		0.000700581	0.00011257	0.000550937	5.02225e-05		0	0	0	0		0.000980013	0.000997224	0.00177307	0.00193168		0.00147193	0.00115795	0.000335601	0.000240716			0.00101343	0.00101343	0.000253123	0.000253123
C13H15O4+	235.096	2	0.000606547	0.00121309	0.000459584	0.000919168		0.0115629	0.0018271	0.0094857	0.000790467		0.00501645	0.00351327	0.00699896	0.00191646		0.00857706	0.00864875	0.0154061	0.0164688		0.00459451	0.00433999	0.00117596	0.0012523			0.00322474	0.00322474	0.000842906	0.000842906
C10H19O6+	235.118	2	0	0	0	0		0.00339111	0.000486468	0.00273163	0.000177476		4.66914e-05	9.09976e-05	3.30227e-05	5.35676e-05		0.00116239	0.00130993	0.00219	0.00270635		0.0046577	0.00408683	0.00110691	0.000868726			0.00204301	0.00204301	0.00052442	0.00052442
C14H19O3+	235.133	2	0.00955093	0.0119359	0.00743263	0.00922437		0.0169097	0.00403206	0.0142094	0.00240818		0.00848006	0.00354589	0.0138346	0.0059959		0.0106663	0.00862049	0.0177478	0.0180495		0.00889469	0.0023983	0.00207157	0.000389024			0.00619513	0.00619513	0.00160323	0.00160323
C18H19+	235.148	2	0.0439029	0.0392733	0.0387807	0.029842		0.0619594	0.00841311	0.0500914	0.00284641		0.0121019	0.00785326	0.0169184	0.00375192		0.0174731	0.017701	0.0315197	0.0340433		0.0159004	0.0164315	0.00413982	0.00478334			0.00739208	0.00739208	0.00184751	0.00184751
C15H23O2+	235.169	2	0.00242361	0.00390361	0.00185679	0.00295707		0.0111974	0.00147209	0.00918	0.000497748		0.00141326	0.000741038	0.0021187	0.000564212		0.00200526	0.00203819	0.0036266	0.00394276		0.00322267	0.00097589	0.000800359	0.000360812			0.00199844	0.00199844	0.000519091	0.000519091
C16H27O+	235.206	2	0.000193637	0.000387274	0.000146788	0.000293576		0.00108085	0.000181376	0.000920273	0.000106302		2.13538e-05	3.01506e-05	5.45993e-05	8.03476e-05		0.000581442	0.000567373	0.00103608	0.00111194		0.00184941	0.000344366	0.000439151	6.3633e-05			0.00125707	0.00125707	0.000339145	0.000339145
C17H31+	235.242	2	2.59593e-05	5.19187e-05	1.96818e-05	3.93635e-05		0.000739354	0.000107087	0.000637006	6.83728e-05		0.000137317	4.17182e-05	0.000241022	0.000119246		0.000321262	0.000322415	0.000574174	0.000605649		0.00168256	0.000485235	0.00039905	9.37113e-05			0.000619782	0.000619782	0.000168343	0.000168343
C8H14NO7+	236.076	2	0.000221732	0.000165654	0.000214897	0.000118132		0.000777149	0.000169017	0.000640001	9.10153e-05		0.000212504	0.000113337	0.000333097	0.000149699		0.000610243	0.000619977	0.00110756	0.00120305		0.000753431	0.00041432	0.000171134	8.08489e-05			0.000315048	0.000315048	7.99579e-05	7.99579e-05
C12H14NO4+	236.092	2	8.16067e-05	0.000163213	6.20967e-05	0.000124193		0.000761955	9.12377e-05	0.000632963	2.9401e-05		0.00022827	0.000133759	0.000330392	7.21031e-05		0.00110971	0.00111711	0.00199825	0.00212703		0.0031286	0.00194342	0.000761737	0.000508138			0.0002301	0.0002301	5.84935e-05	5.84935e-05
C9H18NO6+	236.113	2	0.000141599	0.000283198	0.000107756	0.000215512		0.00132313	0.000272802	0.00108718	0.000142081		0.000415908	0.000226409	0.00063306	0.000219261		0.00292974	0.00295001	0.00527749	0.00562128		0.00504973	0.00217553	0.00121741	0.000581777			0.000361048	0.000361048	9.07272e-05	9.07272e-05
C13H18NO3+	236.128	2	0.000120355	0.00024071	9.15957e-05	0.000183191		0.00125452	0.000100829	0.00105631	2.0107e-05		0.000249203	0.000113227	0.000410392	0.00019986		0.00181788	0.0018237	0.00325935	0.00343344		0.00573259	0.00430233	0.0014981	0.00126858			0.000310948	0.000310948	8.19702e-05	8.19702e-05
C10H22NO5+	236.149	2	0.000538754	0.00107751	0.000410053	0.000820105		0.00259355	0.000536863	0.00215258	0.000289461		0.000815688	0.000336255	0.00126488	0.000361439		0.00105322	0.00106246	0.00190105	0.00203417		0.00153839	0.000330422	0.000384387	0.000133474			0.000267647	0.000267647	6.8065e-05	6.8065e-05
C14H22NO2+	236.165	2	3.51341e-05	7.02682e-05	2.67428e-05	5.34855e-05		0.00232409	0.000267051	0.00194714	9.50042e-05		0.000268591	0.000152148	0.000379207	0.000185772		0.000466948	0.000467031	0.000826915	0.000849676		0.00258045	0.00104412	0.000666112	0.00035529			0.000171232	0.000171232	4.49884e-05	4.49884e-05
C15H26NO+	236.201	2	0	0	0	0		0.000449262	2.81106e-05	0.000383147	1.27767e-05		1.69733e-05	1.16347e-05	4.18526e-05	3.37072e-05		0.000388677	0.000389268	0.000685217	0.00069888		0.00237182	0.000516286	0.000571033	0.00012731			0.000181549	0.000181549	4.80699e-05	4.80699e-05
C16H30N+	236.237	2	1.05541e-05	2.11083e-05	8.0359e-06	1.60718e-05		0.000238504	4.8407e-05	0.00020066	2.73361e-05		5.23657e-05	1.55795e-05	9.61502e-05	4.65976e-05		0.000424698	0.000430606	0.000770188	0.000833302		0.00217931	0.000520871	0.00051498	7.67468e-05			0.000185018	0.000185018	5.04394e-05	5.04394e-05
C8H13O8+	237.06	2	0.000246711	0.000303164	0.000194138	0.000237978		0.000493667	0.000123952	0.000412806	7.28865e-05		5.95853e-05	8.15545e-05	0.000188201	0.000273176		0.000147678	0.000151343	0.000270652	0.000298525		0.000849102	0.000769868	0.000193699	0.000154233			0.00101841	0.00101841	0.000256986	0.000256986
C12H13O5+	237.076	2	0.000513689	0.000661227	0.000401906	0.00051193		0.00251201	0.000425399	0.00204909	0.000187409		0.00141367	0.000914412	0.00199613	0.00042534		0.00178354	0.00178985	0.00322585	0.0034463		0.00104193	0.000605201	0.000253903	0.000170068			0.00129194	0.00129194	0.000330752	0.000330752
C16H13O2+	237.091	2	0.00147213	0.00146733	0.00124608	0.00114279		0.00281735	0.000455922	0.00229715	0.000192154		0.000597258	0.000384817	0.000992928	0.000681103		0.00350604	0.00354167	0.00636183	0.00682919		0.00308352	0.00222725	0.000777656	0.000666044			0.00237196	0.00237196	0.000593461	0.000593461
C13H17O4+	237.112	2	0.00093786	0.00187572	0.000716741	0.00143348		0.00814859	0.00143042	0.00680433	0.000715105		0.00484137	0.0029306	0.0072237	0.00246974		0.00508995	0.00515567	0.00925781	0.00999631		0.00354518	0.00199586	0.000893356	0.000608368			0.00365268	0.00365268	0.000959145	0.000959145
C17H17O+	237.127	2	0.0008937	0.0017874	0.000683036	0.00136607		0.00730255	0.000923597	0.0059619	0.000283704		0.000907125	0.000950637	0.000967659	0.000452769		0.00458163	0.00462596	0.00831119	0.00891195		0.00428188	0.00312587	0.00109176	0.000944646			0.00397614	0.00397614	0.00101042	0.00101042
C14H21O3+	237.149	2	0.00192958	0.00385916	0.00147487	0.00294974		0.00711119	0.00206759	0.00613676	0.00135582		0.00322967	0.000772389	0.005817	0.00297474		0.00265286	0.00267508	0.00480692	0.00513877		0.00411661	0.00155964	0.000987391	0.000347311			0.00286876	0.00286876	0.000753871	0.000753871
C18H21+	237.164	2	0.00870482	0.0174096	0.00665394	0.0133079		0.0912249	0.0142683	0.0757569	0.00630094		0.0201791	0.00993321	0.0298084	0.00960073		0.00827506	0.00839034	0.0150661	0.0163013		0.0106845	0.00865561	0.00280509	0.00254089			0.00758278	0.00758278	0.0019879	0.0019879
C15H25O2+	237.185	2	0.000439371	0.000878742	0.000335884	0.000671768		0.00675321	0.000902351	0.00561508	0.000334173		0.000295595	0.000165208	0.000442484	0.000119909		0.000609588	0.000619933	0.00111238	0.00121058		0.00102838	0.000296346	0.000264706	0.000121097			0.000714649	0.000714649	0.000189901	0.000189901
C16H29O+	237.221	2	9.66019e-05	0.000193204	7.38602e-05	0.00014772		0.00114725	0.000224651	0.000973182	0.000128323		6.67621e-06	1.49284e-05	1.77704e-05	3.97359e-05		0.001466	0.00147225	0.00264479	0.00279596		0.00197096	0.000546487	0.00047341	0.000100718			0.00109066	0.00109066	0.000304006	0.000304006
C17H33+	237.258	2	8.82903e-06	1.76581e-05	6.75157e-06	1.35031e-05		0.000668609	0.000104651	0.000593504	8.03443e-05		6.12656e-05	6.05512e-05	0.000122321	0.000145087		0.000225439	0.000230967	0.000413441	0.000455795		0.00151374	0.000571048	0.000363714	0.000112334			0.00101515	0.00101515	0.000279079	0.000279079
C11H12NO5+	238.071	2	0.000634938	0.000613257	0.000546733	0.000485299		0.00185546	0.000389037	0.00153648	0.000205821		0.000526713	0.000247892	0.000826358	0.000269127		0.00146041	0.00147347	0.002658	0.0028453		0.00286893	0.0022585	0.000676555	0.000465572			0.000628345	0.000628345	0.000165767	0.000165767
C8H16NO7+	238.092	2	0.000532434	0.000360769	0.000528028	0.000197185		0.000749555	0.000142605	0.000616168	6.97646e-05		0.000367515	0.000139454	0.000591607	0.000181782		0.00166548	0.00166989	0.00300828	0.00316244		0.00240935	0.00120977	0.000556218	0.000239519			0.000260191	0.000260191	6.47749e-05	6.47749e-05
C12H16NO4+	238.107	2	0.000121899	0.000243798	9.35516e-05	0.000187103		0.0013053	0.000158078	0.00110245	6.08868e-05		0.000368432	0.000294348	0.000529613	0.000245737		0.00166956	0.00168567	0.00304111	0.00326073		0.00424682	0.0026077	0.0010947	0.000805735			0.000299427	0.000299427	7.73301e-05	7.73301e-05
C9H20NO6+	238.129	2	0.000201051	0.000402103	0.000154311	0.000308621		0.00148139	0.000328413	0.00125175	0.000189849		0.000589442	0.000202823	0.000960829	0.000311673		0.00213407	0.0021472	0.0038739	0.00411793		0.00384532	0.00180603	0.000934612	0.000429196			0.000428183	0.000428183	0.000110202	0.000110202
C13H20NO3+	238.144	2	0.000177274	0.000354548	0.00013607	0.00027214		0.00152165	0.000265196	0.00128066	0.000135282		0.000289262	0.000236661	0.000442805	0.00030904		0.00194562	0.00196555	0.00354638	0.00380755		0.00797458	0.00423543	0.00211392	0.00136792			0.000320774	0.000320774	8.40912e-05	8.40912e-05
C14H24NO2+	238.18	2	0	0	0	0		0.00233692	0.000247412	0.00196928	6.99111e-05		0.000119178	6.99673e-05	0.000162686	6.7379e-05		0.000331867	0.000335584	0.000605503	0.000651468		0.00127079	0.000480598	0.000328038	0.000157275			0.000114899	0.000114899	3.05991e-05	3.05991e-05
C15H28NO+	238.217	2	5.43621e-06	1.08724e-05	4.17394e-06	8.34789e-06		0.000546899	5.82168e-05	0.000454598	1.15746e-05		4.44815e-06	6.95138e-06	1.31708e-05	1.94754e-05		0.000618081	0.000628942	0.00113326	0.00123466		0.00341499	0.00101859	0.000842421	0.000244685			0.000207236	0.000207236	5.57174e-05	5.57174e-05
C16H32N+	238.253	2	3.99403e-05	7.98806e-05	3.0671e-05	6.13421e-05		0.000334365	8.35046e-05	0.000280218	4.89258e-05		8.35178e-05	1.6879e-05	0.000144565	5.3349e-05		0.0003683	0.000370145	0.000667998	0.000707778		0.00176521	0.000414663	0.000431845	9.44715e-05			0.000216823	0.000216823	5.89606e-05	5.89606e-05
C14H7O4+	239.034	2	8.91587e-05	0.000178317	6.86923e-05	0.000137385		0.00209431	0.00046521	0.0017684	0.000265958		0.000316941	0.000123753	0.000566191	0.000269672		0.000330502	0.000331046	0.000598179	0.000626187		0.000310045	0.000169242	7.44761e-05	3.42076e-05			0.000615136	0.000615136	0.000155335	0.000155335
C11H11O6+	239.055	2	0.000387396	0.000521761	0.000305262	0.000404206		0.00429428	0.000757718	0.00356593	0.000359017		0.00135394	0.000755195	0.00198085	0.000427137		0.00189847	0.00192409	0.003483	0.00376529		0.000812146	0.000418514	0.000193206	9.78916e-05			0.00127434	0.00127434	0.000319608	0.000319608
C15H11O3+	239.07	2	0.00413602	0.00247687	0.00442385	0.00158701		0.00415182	0.00104417	0.00333756	0.000578524		0.000372707	0.000219712	0.000886269	0.000927256		0.00245025	0.0024808	0.004492	0.00484593		0.00527232	0.0039692	0.00124772	0.000828144			0.00402372	0.00402372	0.0010333	0.0010333
C12H15O5+	239.091	2	0.000301525	0.000376152	0.000238671	0.000295776		0.00147504	0.000249041	0.00122831	0.000115171		0.000573835	0.000346088	0.000864035	0.000283528		0.000978632	0.000989513	0.00179229	0.00192799		0.000588968	0.000353887	0.000146494	0.000101629			0.000593016	0.000593016	0.000154126	0.000154126
C9H19O7+	239.113	2	0.000551113	0.000498854	0.000486715	0.000377667		0.00115591	0.000191135	0.000940417	8.24244e-05		0.000170074	0.000150951	0.000235371	0.000118954		0.0016816	0.00169108	0.00306336	0.00325164		0.00119512	0.0010065	0.000312828	0.000306207			0.000599091	0.000599091	0.000154145	0.000154145
C13H19O4+	239.128	2	0.000311603	0.000623206	0.000240169	0.000480339		0.00359067	0.00070148	0.00306916	0.000402747		0.00177174	0.000840057	0.00283029	0.00106163		0.00102551	0.0010429	0.00188673	0.00205323		0.00106039	0.000140181	0.00026366	4.70373e-05			0.00132511	0.00132511	0.000352901	0.000352901
C17H19O+	239.143	2	0.000519183	0.00103837	0.000400188	0.000800376		0.00566194	0.000673296	0.00467723	0.00018553		0.000805338	0.000833397	0.000884607	0.000349132		0.0031435	0.00316358	0.0057322	0.00609711		0.00263853	0.00195356	0.000690448	0.000598003			0.0024559	0.0024559	0.000643247	0.000643247
C14H23O3+	239.164	2	0.000350071	0.000700141	0.00026986	0.000539719		0.00257289	0.00110761	0.00227673	0.000773669		0.000879592	0.000206558	0.00172728	0.000931785		0.000307817	0.000325312	0.000577458	0.000665109		0.00103044	0.00070877	0.000257181	0.000199067			0.000833459	0.000833459	0.000222509	0.000222509
C18H23+	239.179	2	0.00104785	0.0020957	0.000807809	0.00161562		0.0521137	0.00792571	0.0443343	0.00391576		0.00815919	0.00391684	0.012584	0.00552067		0.00270193	0.00271696	0.00492305	0.00522455		0.00391502	0.00188217	0.00103421	0.00058609			0.00334926	0.00334926	0.000904631	0.000904631
C15H27O2+	239.201	2	0.000182217	0.000364434	0.000140487	0.000280975		0.0112794	0.00155217	0.00949132	0.000626813		0.000402406	0.000298179	0.000536053	0.000173592		0.00075625	0.000766367	0.00138817	0.00150031		0.0012704	0.000328732	0.000328272	0.000128718			0.00120241	0.00120241	0.000326708	0.000326708
C16H31O+	239.237	2	6.0918e-05	0.000121836	4.69743e-05	9.39485e-05		0.000550214	0.000139304	0.000469463	8.53339e-05		0	0	0	0		0.00284908	0.00286267	0.00518731	0.00549228		0.00253391	0.000556798	0.000612933	6.26472e-05			0.00167668	0.00167668	0.000467547	0.000467547
C17H35+	239.273	2	0	0	0	0		0.000739782	0.00014622	0.000658383	0.000104556		0.000281938	0.000129888	0.000471944	0.000262835		0.00054146	0.000543987	0.000985855	0.00104349		0.00321333	0.00118234	0.000779981	0.000223077			0.00321552	0.00321552	0.000883727	0.000883727
C14H10NO3+	240.066	2	0.000117554	0.000121517	9.93736e-05	9.50807e-05		0.000463244	0.000101546	0.000384055	5.44779e-05		0.000181508	0.000100712	0.000274618	7.81268e-05		0.000528248	0.000533016	0.000969598	0.00103813		0.000759852	0.000431545	0.000182848	9.47774e-05			0.000125503	0.000125503	3.25544e-05	3.25544e-05
C15H14NO2+	240.102	2	9.08496e-05	0.000128218	7.20088e-05	9.91411e-05		0.000401194	7.14645e-05	0.000332442	3.35403e-05		0.000118327	5.80347e-05	0.000186247	6.07991e-05		0.000788651	0.000793598	0.00144372	0.00153514		0.000856721	0.000431825	0.00020818	0.000100916			0.000140457	0.000140457	3.59803e-05	3.59803e-05
C12H18NO4+	240.123	2	0.000135729	0.000271458	0.000105051	0.000210102		0.00136526	0.000272693	0.00114481	0.000143516		0.000409871	0.00023718	0.00061976	0.000186333		0.00217768	0.0021915	0.00398717	0.0042405		0.00363505	0.0022014	0.000963255	0.000689024			0.000274057	0.000274057	7.23065e-05	7.23065e-05
C13H22NO3+	240.159	2	1.83557e-05	3.67114e-05	1.4209e-05	2.8418e-05		3.24988e-06	4.05331e-06	2.48858e-06	3.10381e-06		1.19806e-05	1.08265e-05	1.70853e-05	9.75064e-06		0.000241377	0.000242263	0.000440508	0.000464782		0.00218275	0.00134003	0.000595619	0.000437817			6.88584e-05	6.88584e-05	1.81303e-05	1.81303e-05
C17H22N+	240.175	2	5.41634e-05	0.000108327	4.19302e-05	8.38604e-05		0.00390849	0.000677338	0.00343735	0.000442509		0.000646704	0.00020673	0.00108478	0.000407746		0.000687327	0.00070567	0.00127762	0.00141334		0.00208493	0.000672279	0.000533596	0.000225913			0.000373607	0.000373607	0.000104294	0.000104294
C15H30NO+	240.232	2	1.36797e-05	2.73594e-05	1.05926e-05	2.11851e-05		0.000563448	0.000185483	0.000458917	0.000113221		0.000197521	6.73743e-05	0.000347059	0.00018438		0.00150841	0.00138587	0.00267126	0.00277021		0.00813316	0.00178557	0.00202181	0.000383981			0.000739792	0.000739792	0.000203443	0.000203443
C16H34N+	240.269	2	4.92388e-06	9.84775e-06	3.81328e-06	7.62656e-06		0.000176193	2.96849e-05	0.000149557	1.49288e-05		5.24082e-05	9.79379e-06	9.39557e-05	4.05694e-05		0.000205723	0.000210598	0.000381911	0.000420477		0.00315541	0.000904205	0.000782362	0.000195646			0.000247388	0.000247388	6.72435e-05	6.72435e-05
C11H13O6+	241.071	2	0.000115379	0.000146398	9.19163e-05	0.000115572		0.000416009	6.72102e-05	0.000346885	2.92239e-05		0.000193255	0.000100214	0.000308316	0.000120461		0.000449548	0.000456463	0.000832905	0.000903735		0.000241896	0.000133954	5.91274e-05	3.38298e-05			0.000249426	0.000249426	6.37682e-05	6.37682e-05
C8H17O8+	241.092	2	0.000206142	0.0001273	0.000212225	8.30608e-05		0.000337529	5.09557e-05	0.000273679	2.2062e-05		5.79314e-05	5.99667e-05	6.77806e-05	2.60751e-05		0.000508584	0.000509588	0.000929093	0.000974041		0.000518628	0.00038127	0.000130786	0.000102144			0.00021372	0.00021372	5.42223e-05	5.42223e-05
C12H17O5+	241.107	2	0.000254834	0.000509668	0.000198047	0.000396094		0.00146216	0.000368401	0.00123872	0.000218468		0.000708672	0.000307957	0.00120084	0.000570176		0.000838442	0.000599161	0.00137888	0.00139188		0.00101901	0.000917922	0.000229388	0.000196081			0.000644465	0.000644465	0.000170745	0.000170745
C16H17O2+	241.122	2	0.00130109	0.00260218	0.00101122	0.00202244		0.00966939	0.00161422	0.00799151	0.00070903		0.00238391	0.00149071	0.00337615	0.000675683		0.0101056	0.0102062	0.0186465	0.0200068		0.00594912	0.00662405	0.00162277	0.00193806			0.00152773	0.00152773	0.00040083	0.00040083
C13H21O4+	241.143	2	0.000876477	0.00175295	0.000681266	0.00136253		0.00585023	0.00114652	0.00499563	0.000634939		0.00186146	0.000507358	0.00328887	0.00148887		0.00192583	0.00194142	0.00354762	0.00378994		0.003712	0.000842346	0.000943234	0.000286216			0.0019179	0.0019179	0.000513569	0.000513569
C17H21O+	241.159	2	0.000908763	0.00181753	0.000706406	0.00141281		0.0138162	0.0019106	0.0116213	0.00072054		0.00251035	0.0018474	0.00332837	0.00085449		0.00658775	0.00663859	0.0121316	0.0129481		0.00549398	0.00328139	0.0014453	0.00101262			0.00301949	0.00301949	0.000821418	0.000821418
C14H25O3+	241.18	2	0.000209952	0.000419903	0.000163215	0.000326431		0.00437769	0.00187384	0.00404506	0.00139243		0.00122211	0.000374687	0.00256595	0.00149984		0.000294316	0.000327809	0.000566888	0.00069235		0.00221188	0.0015851	0.000561153	0.000448736			0.00172281	0.00172281	0.000474383	0.000474383
C18H25+	241.195	2	6.45359e-05	0.000129072	5.01732e-05	0.000100346		0.0455419	0.0045072	0.0405767	0.00351487		0.00444252	0.0016283	0.00748641	0.00325849		0.00211455	0.00192579	0.00374883	0.00392545		0.00476197	0.00202452	0.00124688	0.000631393			0.00400656	0.00400656	0.00111963	0.00111963
C15H29O2+	241.216	2	9.9777e-05	0.000199554	7.7578e-05	0.000155156		0.00734958	0.000747793	0.00642344	0.000404213		0.000415525	0.000213129	0.000632459	0.00015291		0.00257414	0.00259039	0.00473444	0.00503485		0.00149549	0.000303999	0.000385501	0.000113359			0.00131438	0.00131438	0.000361741	0.000361741
C16H33O+	241.253	2	4.24442e-05	8.48884e-05	3.30059e-05	6.60119e-05		0.0014943	0.000315173	0.0012584	0.00017121		0.0001089	6.53963e-05	0.00018571	0.000131378		0.000501102	0.000511746	0.000932725	0.00102274		0.00153391	0.000420584	0.000379498	8.75488e-05			0.000938326	0.000938326	0.000262033	0.000262033
C13H8NO4+	242.045	2	0.00023852	0.000161898	0.000290644	0.000161235		0.000329999	4.61751e-05	0.000282767	2.06106e-05		0.00013197	3.65378e-05	0.000231085	0.000102905		0.000143532	0.000127667	0.000253126	0.000291404		0.0011443	0.000860082	0.000277494	0.000194254			0.000125026	0.000125026	3.11558e-05	3.11558e-05
C10H12NO6+	242.066	2	0	0	0	0		5.59565e-05	7.69023e-06	4.65415e-05	2.72591e-06		1.37306e-05	1.08656e-05	2.07455e-05	9.60772e-06		8.83252e-06	8.97967e-06	1.56975e-05	1.57392e-05		0.000134258	9.58771e-05	3.4382e-05	2.70007e-05			1.69885e-05	1.69885e-05	4.58539e-06	4.58539e-06
C14H12NO3+	242.081	2	4.31974e-05	5.17025e-05	3.51419e-05	4.07652e-05		9.09561e-05	1.71996e-05	7.63136e-05	8.61027e-06		4.38813e-05	2.56964e-05	6.92476e-05	2.98598e-05		0.000327582	0.00033089	0.000606938	0.000651432		0.000312731	0.000144697	7.80576e-05	3.90895e-05			5.78729e-05	5.78729e-05	1.49826e-05	1.49826e-05
C11H16NO5+	242.102	2	3.4652e-05	5.30883e-05	2.74025e-05	4.14459e-05		0.000367958	6.74558e-05	0.000301325	3.20079e-05		9.8519e-05	7.66417e-05	0.000136617	4.65057e-05		0.000548017	0.000548024	0.000996696	0.00102721		0.00104741	0.000803978	0.000275684	0.000244308			0.00010471	0.00010471	2.72211e-05	2.72211e-05
C15H16NO2+	242.118	2	0.000225866	0.000451731	0.000176272	0.000352545		0.000682313	0.00013091	0.000591047	7.59883e-05		0.000295944	9.6801e-05	0.00050415	0.000190562		0.00142534	0.00146696	0.00267456	0.00297007		0.00271456	0.00136405	0.000678827	0.000312439			0.000137517	0.000137517	3.64892e-05	3.64892e-05
C12H20NO4+	242.139	2	0.000479962	0.000959924	0.00037461	0.00074922		0.00390034	0.000451658	0.00333066	0.000145778		0.000988289	0.000635987	0.00146793	0.000445849		0.00274426	0.00274965	0.00503502	0.00527837		0.0141343	0.00679928	0.00384271	0.00234589			0.000370715	0.000370715	0.000101989	0.000101989
C16H20NO+	242.154	2	0.00013321	0.000266419	0.000103977	0.000207953		0.0017999	0.000311247	0.0015514	0.000168111		0.00038291	0.000126875	0.000642331	0.000211421		0.00155887	0.00159069	0.002911	0.00318743		0.00299028	0.000997467	0.000805267	0.00038682			0.000378516	0.000378516	0.000100663	0.000100663
C13H24NO3+	242.175	2	0.000124541	0.000249082	9.72187e-05	0.000194437		0.000528163	7.68221e-05	0.00043863	2.93144e-05		5.63573e-05	6.05454e-05	6.80617e-05	3.37141e-05		0.000631915	0.000648584	0.00118424	0.00130942		0.0022115	0.000446995	0.000584914	0.000214489			0.000159949	0.000159949	4.25792e-05	4.25792e-05
C17H24N+	242.19	2	0	0	0	0		0.00205769	0.000392128	0.00190482	0.000333462		0.000356436	8.62286e-05	0.000646716	0.000265932		0.00024198	0.00019839	0.000388244	0.000363648		0.00121184	0.000527673	0.00029976	0.000130309			0.000311876	0.000311876	8.8058e-05	8.8058e-05
C14H28NO2+	242.211	2	3.36877e-05	6.73753e-05	2.63011e-05	5.26023e-05		0.000645266	6.78332e-05	0.000587183	8.26963e-05		9.91293e-06	8.4705e-06	1.34314e-05	9.76905e-06		0.00099174	0.00100371	0.00184154	0.00198499		0.00103201	0.000145382	0.000267249	6.78923e-05			0.000173207	0.000173207	4.84062e-05	4.84062e-05
C15H32NO+	242.248	2	1.53435e-05	3.0687e-05	1.1981e-05	2.3962e-05		0.000663681	0.000126383	0.00056964	6.95913e-05		0.000101306	3.74782e-05	0.000173938	7.65982e-05		0.00136476	0.00137907	0.00253121	0.0027191		0.00557498	0.00108275	0.0013944	0.000172789			0.000369844	0.000369844	0.000107328	0.000107328
C10H11O7+	243.05	2	3.65606e-06	7.31211e-06	2.86433e-06	5.72866e-06		1.65474e-05	6.22869e-06	1.24379e-05	5.15234e-06		4.25262e-05	2.4893e-05	6.79979e-05	2.8404e-05		6.74785e-05	1.91924e-05	6.55399e-05	3.28041e-05		3.18401e-05	2.58131e-05	7.58219e-06	5.45553e-06			6.80012e-05	6.80012e-05	1.77569e-05	1.77569e-05
C14H11O4+	243.065	2	5.78069e-05	4.3287e-05	5.56066e-05	3.5809e-05		4.09151e-05	6.26965e-06	3.28944e-05	3.46316e-06		5.32241e-06	7.16965e-06	4.64714e-06	4.62096e-06		8.69846e-05	8.78229e-05	0.000161754	0.000173431		0.000212296	0.000166424	5.24219e-05	3.59363e-05			9.32479e-05	9.32479e-05	2.36494e-05	2.36494e-05
C11H15O6+	243.086	2	0.00026322	0.00023336	0.000244378	0.000177772		0.000734652	0.000166806	0.000613919	9.14446e-05		0.000338687	0.000187963	0.000550812	0.000255134		0.00054567	0.00040732	0.000918022	0.000942043		0.00024273	0.000212602	5.50321e-05	4.59558e-05			0.000347324	0.000347324	9.16745e-05	9.16745e-05
C15H15O3+	243.102	2	0.00146146	0.00158957	0.00122991	0.0012515		0.00421306	0.000676888	0.00351158	0.00028904		0.00105275	0.000777938	0.00141662	0.000225093		0.00662357	0.00665659	0.0122585	0.0129876		0.00449726	0.00389718	0.00121437	0.00119847			0.00167765	0.00167765	0.000438406	0.000438406
C12H19O5+	243.123	2	0.00154892	0.00309784	0.00121386	0.00242773		0.00740621	0.00118112	0.00633998	0.000564779		0.00225756	0.000818684	0.00393051	0.00180247		0.00292534	0.00296536	0.00545942	0.00590406		0.00459623	0.00127455	0.00116966	0.000337853			0.0052605	0.0052605	0.00139792	0.00139792
C16H19O2+	243.138	2	0.00218497	0.00436995	0.00171244	0.00342488		0.0205759	0.00316902	0.0174875	0.00139629		0.00656161	0.00388974	0.00958237	0.00195794		0.0143372	0.0145013	0.026711	0.0287536		0.00961991	0.00942295	0.00264525	0.00286332			0.00398912	0.00398912	0.00107286	0.00107286
C13H23O4+	243.159	2	0.000264856	0.000529712	0.000207595	0.000415189		0.00189762	0.00035538	0.00164394	0.000200713		0.00032212	4.28929e-05	0.000626567	0.000337889		0.000464348	0.000466303	0.000858717	0.000907635		0.000777178	0.00033429	0.000207734	0.000108815			0.000670183	0.000670183	0.000182214	0.000182214
C17H23O+	243.174	2	0.000668413	0.00133683	0.000523937	0.00104787		0.0105759	0.00133079	0.00912822	0.000553798		0.00197413	0.00106179	0.00294728	0.000711318		0.00289399	0.00290765	0.00535582	0.00566984		0.00333156	0.00116265	0.000873596	0.00036183			0.00227542	0.00227542	0.000632669	0.000632669
C14H27O3+	243.195	2	0.000186651	0.000373302	0.000146319	0.000292639		0.00195279	0.000615349	0.00180258	0.000462518		0.000325754	0.000148973	0.000750021	0.00052197		0.000364272	0.00039421	0.000701015	0.000830301		0.00127486	0.000614052	0.000323578	0.000147646			0.00105025	0.00105025	0.000293512	0.000293512
C18H27+	243.211	2	8.14978e-05	0.000162996	6.38917e-05	0.000127783		0.0108644	0.000567038	0.0100901	0.00115633		0.0013876	0.00037717	0.00236907	0.000828373		0.000869951	0.000665905	0.00146478	0.00147649		0.00223629	0.000822638	0.00057364	0.000192208			0.00192137	0.00192137	0.000552084	0.000552084
C15H31O2+	243.232	2	9.69964e-05	0.000193993	7.60488e-05	0.000152098		0.00334	0.000134606	0.0030089	0.000210871		0.000168089	0.000151487	0.000237017	0.000129586		0.00263528	0.00265805	0.00489931	0.00524081		0.000736651	7.88213e-05	0.000193073	4.97782e-05			0.000890596	0.000890596	0.000250079	0.000250079
C9H10NO7+	244.045	2	1.64805e-05	3.2961e-05	1.29647e-05	2.59294e-05		0	0	0	0		5.29362e-05	3.02783e-05	8.34134e-05	2.95189e-05		0.000100693	2.98642e-05	0.000130802	0.000114202		0.000185076	5.26533e-05	4.8151e-05	1.60589e-05			9.77182e-05	9.77182e-05	2.6202e-05	2.6202e-05
C10H14NO6+	244.082	2	9.63087e-05	9.23805e-05	8.94496e-05	7.06596e-05		0.000324717	5.84354e-05	0.000272246	2.78e-05		0.000105071	8.02965e-05	0.000158512	7.63962e-05		0.0002013	0.000201333	0.00037021	0.000383642		0.000441783	0.000295677	0.000107823	6.03759e-05			0.000137021	0.000137021	3.6449e-05	3.6449e-05
C14H14NO3+	244.097	2	0.000114556	0.000180162	0.000100611	0.000142792		0.000473257	0.000109785	0.000401161	6.22134e-05		0.000176076	7.29823e-05	0.000292789	0.000115971		0.00134268	0.00136558	0.00252197	0.002745		0.0010034	0.00075808	0.000269555	0.000239571			0.000158905	0.000158905	4.23006e-05	4.23006e-05
C11H18NO5+	244.118	2	0.000149932	0.000299864	0.000117982	0.000235965		0.00148401	0.000212852	0.00125816	8.30501e-05		0.000413315	0.000298227	0.000602492	0.000195167		0.00236142	0.00238658	0.00441431	0.00474377		0.00449878	0.00160531	0.00118159	0.000543352			0.000373486	0.000373486	9.78866e-05	9.78866e-05
C15H18NO2+	244.133	2	0.000155229	0.000310458	0.000122158	0.000244317		0.00120199	0.000215526	0.00103094	0.000110952		0.00053933	0.000235095	0.000878348	0.000299103		0.00328153	0.00328963	0.00607641	0.00638342		0.00396575	0.00283561	0.00107648	0.000915023			0.00020429	0.00020429	5.5041e-05	5.5041e-05
C12H22NO4+	244.154	2	1.69119e-06	3.38237e-06	1.331e-06	2.66201e-06		0.000651602	8.3042e-05	0.00054789	2.65341e-05		9.98477e-05	6.90966e-05	0.000142557	3.77837e-05		0.000689309	0.000697656	0.00129031	0.00139094		0.00217605	0.000410996	0.000580066	0.00019508			0.000168389	0.000168389	4.54138e-05	4.54138e-05
C16H22NO+	244.17	2	7.06568e-05	0.000141314	5.56121e-05	0.000111224		0.000962992	0.000164988	0.000864008	0.000112279		0.000215889	5.79436e-05	0.00038308	0.0001594		0.00080731	0.0008183	0.00151308	0.00163609		0.00145076	0.000663757	0.000391084	0.000195595			0.000196962	0.000196962	5.37449e-05	5.37449e-05
C13H26NO3+	244.191	2	7.60187e-06	1.52037e-05	5.98375e-06	1.19675e-05		0.000377487	5.46173e-05	0.000316926	2.08757e-05		2.03267e-05	9.62516e-06	4.32202e-05	2.86855e-05		0.000330622	0.000334783	0.000619218	0.000668167		0.00122378	0.000586568	0.000314278	0.000130769			0.000155052	0.000155052	4.19255e-05	4.19255e-05
C17H26N+	244.206	2	2.3873e-05	4.7746e-05	1.87926e-05	3.75852e-05		0.000628226	0.000108295	0.000607195	0.000118255		8.9114e-05	1.42803e-05	0.000182687	0.000101868		0.000259184	0.000268823	0.000492481	0.00055323		0.000593372	0.000222078	0.000146574	4.14565e-05			0.00019525	0.00019525	5.65134e-05	5.65134e-05
C14H30NO2+	244.227	2	4.79183e-05	9.58366e-05	3.77241e-05	7.54482e-05		0.000239776	3.92975e-05	0.000198968	1.72141e-05		2.64182e-05	2.44136e-05	3.18019e-05	1.28858e-05		0.0011625	0.00116274	0.00213992	0.00221896		0.00222561	0.000709354	0.000580078	0.000232646			0.00014078	0.00014078	3.93864e-05	3.93864e-05
C9H9O8+	245.029	2	5.44754e-06	1.08951e-05	4.30276e-06	8.60553e-06		1.62487e-05	4.48056e-06	1.38526e-05	2.72422e-06		2.72276e-05	9.82289e-06	4.63204e-05	1.75245e-05		6.45203e-05	4.84805e-05	3.82565e-05	2.2802e-05		5.83162e-06	7.78038e-06	1.74128e-06	2.35219e-06			3.66364e-05	3.66364e-05	9.52732e-06	9.52732e-06
C13H9O5+	245.044	2	0	0	0	0		0	0	0	0		0	0	0	0		1.59571e-05	2.70742e-05	3.45217e-05	5.89394e-05		6.46375e-05	4.84745e-05	1.60396e-05	1.0216e-05			3.7401e-05	3.7401e-05	9.78368e-06	9.78368e-06
C10H13O7+	245.066	2	0.000255226	0.000180217	0.000266048	0.000133845		0.000682259	0.000205379	0.00055957	0.000124047		0.000311276	0.000209454	0.000487268	0.000232303		0.000314986	0.000236243	0.000535277	0.000553478		0.000149239	8.345e-05	3.6269e-05	1.84623e-05			0.000327348	0.000327348	8.62656e-05	8.62656e-05
C14H13O4+	245.081	2	0.00106932	0.000513859	0.00123489	0.000438103		0.0013764	0.000242396	0.00114349	0.000112997		0.000210939	0.000179183	0.000264817	5.71689e-05		0.00202156	0.00202945	0.00376651	0.00397715		0.00176492	0.00135495	0.000448122	0.000337368			0.000824907	0.000824907	0.000214504	0.000214504
C11H17O6+	245.102	2	0.0016684	0.00188719	0.00139877	0.00151968		0.00500249	0.000970847	0.00425792	0.000503442		0.00181419	0.000820399	0.00314628	0.00163576		0.00606233	0.00611445	0.0113682	0.0122016		0.00392905	0.00232469	0.000949298	0.000507138			0.00311035	0.00311035	0.000813872	0.000813872
C15H17O3+	245.117	2	0.00227812	0.00420646	0.00180728	0.00332104		0.0149431	0.0023912	0.0126416	0.00103919		0.00486525	0.00335278	0.00688817	0.00127606		0.0192007	0.0193011	0.0358423	0.0380013		0.012235	0.0122875	0.00342677	0.00382035			0.00435607	0.00435607	0.0011632	0.0011632
C12H21O5+	245.138	2	0.000683209	0.00136642	0.000539877	0.00107975		0.00330497	0.000666183	0.00282211	0.00035673		0.000841781	0.000133305	0.00165286	0.00093823		0.00269498	0.00272979	0.00506839	0.00547278		0.00287503	0.000855935	0.000751546	0.000248804			0.00213586	0.00213586	0.000561536	0.000561536
C16H21O2+	245.154	2	0.000448542	0.000897084	0.000354464	0.000708927		0.0104237	0.00155104	0.00905895	0.000749132		0.0033908	0.00172317	0.00521244	0.00120954		0.00496773	0.0049848	0.00925213	0.00975431		0.00429391	0.00264455	0.00118851	0.00083519			0.00215772	0.00215772	0.000595981	0.000595981
C13H25O4+	245.175	2	0.000148668	0.000297335	0.000117496	0.000234992		0.00173905	0.00039112	0.00151531	0.000235087		6.86678e-05	3.88942e-05	0.000148951	9.02895e-05		0.000506757	0.000520845	0.000962242	0.0010663		0.00123323	0.000385418	0.000331789	0.000129044			0.000806168	0.000806168	0.000221916	0.000221916
C17H25O+	245.19	2	0.000184721	0.000369443	0.000145999	0.000291999		0.00899439	0.00110536	0.00792692	0.000559481		0.00158006	0.000579034	0.00260271	0.000758916		0.00218235	0.00220739	0.00410038	0.00441422		0.00309143	0.000872905	0.000813828	0.000245436			0.00242254	0.00242254	0.00068475	0.00068475
C14H29O3+	245.211	2	0.000144552	0.000289104	0.00011426	0.00022852		0.00102068	0.000197233	0.000915891	0.000131763		5.39123e-05	2.42358e-05	8.70289e-05	4.61665e-05		0.00159356	0.00162131	0.00300765	0.00327584		0.00123489	0.000646859	0.000310848	0.000134693			0.00109414	0.00109414	0.000307556	0.000307556
C18H29+	245.226	2	0	0	0	0		0.0016564	0.000157699	0.00153388	0.000172233		0.000264344	4.34181e-05	0.000503215	0.000240505		0.00049542	0.00049556	0.000916086	0.000950672		0.00160874	0.000643813	0.000412465	0.000134706			0.00118083	0.00118083	0.000344546	0.000344546
C15H33O2+	245.248	2	6.1476e-06	1.22952e-05	4.86005e-06	9.72011e-06		0.000881994	0.000134689	0.000795311	9.27342e-05		0.000389058	0.000173185	0.000676755	0.000358625		0.000880812	0.000200362	0.000913816	0.000477488		0.000566879	0.000103627	0.000148397	3.2456e-05			0.000661236	0.000661236	0.000194058	0.000194058
C16H8NO2+	246.055	2	0.000125968	0.000147281	0.000105575	0.000116649		0.000541888	0.000136478	0.000457094	7.89652e-05		0.000191722	0.000107218	0.00031641	0.000157424		0.000189605	0.000196377	0.000362761	0.000406675		0.000232394	0.000178724	6.14921e-05	4.38485e-05			0.000176378	0.000176378	4.80853e-05	4.80853e-05
C13H12NO4+	246.076	2	8.6258e-05	8.2631e-05	7.95914e-05	7.04457e-05		0.000192044	3.26082e-05	0.000168461	1.79145e-05		0.000124912	5.35273e-05	0.000209755	8.95188e-05		0.000557428	0.000558707	0.00104011	0.0010919		0.00036774	0.000247687	9.17057e-05	5.80518e-05			2.78273e-05	2.78273e-05	7.19419e-06	7.19419e-06
C17H12NO+	246.091	2	0.000364725	0.000265574	0.000362343	0.000208739		0.00105021	0.000241853	0.000877178	0.000133213		0.000239659	0.000191205	0.000354473	0.000150557		0.00108505	0.00109718	0.0020457	0.00220087		0.00170234	0.000812748	0.000433194	0.000194602			0.0007906	0.0007906	0.000207672	0.000207672
C14H16NO3+	246.112	2	0.000498271	0.000611115	0.000407408	0.000499014		0.00111344	0.000290555	0.000933064	0.000169314		0.000417281	0.0001571	0.000693229	0.000247716		0.00221925	0.0022352	0.00416887	0.00444353		0.00170707	0.00210885	0.000495666	0.000650251			0.000549458	0.000549458	0.000147926	0.000147926
C15H20NO2+	246.149	2	0.000228327	0.000456654	0.000181173	0.000362346		0.00244245	0.000402418	0.00211138	0.000196402		0.00068517	0.000318735	0.00110243	0.000329957		0.0032707	0.00333796	0.0062094	0.00680078		0.00847023	0.00460722	0.00236012	0.00157452			0.000454616	0.000454616	0.000122827	0.000122827
C12H24NO4+	246.17	2	0	0	0	0		0.000262351	1.33857e-05	0.000232663	9.00244e-06		2.23563e-05	9.39178e-06	3.64599e-05	1.60886e-05		0.000268961	0.000270987	0.000489965	0.000494315		0.00165254	0.00040173	0.000455239	0.000185205			8.72246e-05	8.72246e-05	2.46189e-05	2.46189e-05
C16H24NO+	246.185	2	1.81104e-05	3.62208e-05	1.43724e-05	2.87447e-05		0.00084766	0.000168027	0.000748876	0.000101732		0.000167704	6.26704e-05	0.000283243	0.000100437		0.000810012	0.000818972	0.0015276	0.00164306		0.00263061	0.000440641	0.000695414	0.000158975			0.000240616	0.000240616	6.72326e-05	6.72326e-05
C17H28N+	246.222	2	1.01721e-05	2.03442e-05	8.07373e-06	1.61475e-05		0.000299348	3.45117e-05	0.000276092	3.09551e-05		3.52007e-05	1.00977e-05	6.08002e-05	2.32648e-05		0.000449233	0.000459819	0.000854654	0.000940754		0.00154255	0.00107729	0.000372187	0.000230711			0.000194443	0.000194443	5.62704e-05	5.62704e-05
C8H9NO8+	247.032	2	1.19904e-06	2.39808e-06	9.5484e-07	1.90968e-06		2.72723e-05	1.38955e-05	2.03673e-05	9.5518e-06		2.11646e-05	1.91385e-05	2.83964e-05	8.4434e-06		2.53016e-05	2.90587e-05	5.0366e-05	6.33939e-05		2.9426e-05	1.95036e-05	7.90942e-06	5.54711e-06			3.01769e-05	3.01769e-05	7.66465e-06	7.66465e-06
C10H15O7+	247.081	2	0.0138742	0.00789119	0.0151429	0.00534657		0.0153395	0.002144	0.013186	0.000825156		0.00402688	0.00251486	0.00633935	0.0025978		0.0222522	0.0225734	0.042231	0.0457382		0.0137309	0.0108425	0.00378569	0.00344348			0.0143739	0.0143739	0.00386584	0.00386584
C14H15O4+	247.096	2	0.00295652	0.00217449	0.00292921	0.00148935		0.00769509	0.00113801	0.00647263	0.000459537		0.00143431	0.00112734	0.00188453	0.000304398		0.0104129	0.0104207	0.019439	0.0202497		0.00771862	0.00622716	0.00215901	0.00207352			0.00358332	0.00358332	0.000958778	0.000958778
C11H19O6+	247.118	2	0.0016779	0.00223493	0.00136518	0.00179563		0.00380576	0.000862013	0.00328149	0.000494962		0.00136388	0.000516798	0.002572	0.00158334		0.00549709	0.00566571	0.0105368	0.011727		0.00362734	0.00279556	0.000878371	0.000599491			0.00366922	0.00366922	0.000967754	0.000967754
C15H19O3+	247.133	2	0.00213867	0.00427733	0.0017038	0.0034076		0.0176324	0.00254294	0.0152321	0.00105759		0.00566525	0.00324193	0.00851344	0.00178069		0.0152554	0.0153407	0.0287253	0.0304869		0.0119507	0.0115718	0.00339381	0.00368935			0.00450767	0.00450767	0.00122255	0.00122255
C12H23O5+	247.154	2	0.000392345	0.00078469	0.000312594	0.000625188		0.00245605	0.000406107	0.00210382	0.000186487		0.00032941	0.000144763	0.00056562	0.000236013		0.00193756	0.0019769	0.00369292	0.0040428		0.0017956	0.00111277	0.000500257	0.000382553			0.00127661	0.00127661	0.00033544	0.00033544
C16H23O2+	247.169	2	0.000109671	0.000219342	8.73838e-05	0.000174768		0.0036656	0.000517528	0.00322884	0.000256086		0.000954455	0.000473614	0.00150806	0.000404573		0.00124025	0.00125067	0.00234272	0.00250459		0.00117441	0.000509997	0.000322384	0.00015608			0.000753543	0.000753543	0.000210341	0.000210341
C13H27O4+	247.19	2	6.37472e-05	0.000127494	5.07969e-05	0.000101594		0.000799549	0.00013616	0.000706688	7.68571e-05		1.05248e-05	1.56188e-05	2.15072e-05	3.04163e-05		0.000271029	0.000271663	0.000499282	0.000507993		0.000920255	0.000103386	0.000250953	7.49111e-05			0.00050677	0.00050677	0.000138944	0.000138944
C17H27O+	247.206	2	0.000213752	0.000427505	0.000170339	0.000340678		0.0041005	0.000675989	0.00364052	0.000389318		0.000516913	0.000139855	0.000913443	0.000329673		0.00109813	0.000585127	0.00169956	0.00156497		0.00242859	0.000553725	0.000626562	8.29528e-05			0.00146704	0.00146704	0.00041506	0.00041506
C14H31O3+	247.227	2	0.0012192	0.000995949	0.00119995	0.000817037		0.00169981	0.000321416	0.00145788	0.000164775		0.000267888	0.000150337	0.000426662	0.000152141		0.00447025	0.00452587	0.00847583	0.0091431		0.000811155	0.000256703	0.000216535	8.6693e-05			0.000781713	0.000781713	0.00021894	0.00021894
C18H31+	247.242	2	0	0	0	0		0.000655388	6.49838e-05	0.000593921	4.5395e-05		3.72395e-05	2.48226e-05	6.86776e-05	5.86126e-05		0.000303309	0.000307029	0.000575044	0.000620087		0.0010366	0.000517448	0.000274342	0.00013489			0.000955883	0.000955883	0.000282953	0.000282953
C13H14NO4+	248.092	2	9.09824e-05	0.000150627	7.3451e-05	0.000120366		0.000546805	0.000137996	0.000483396	8.73511e-05		0.000283401	0.000186539	0.00045148	0.000216161		0.00124172	0.00124184	0.00231192	0.00237812		0.00252295	0.00196445	0.000643782	0.000470371			0.000151612	0.000151612	4.08589e-05	4.08589e-05
C10H18NO6+	248.113	2	0.000381464	0.000762928	0.000305109	0.000610217		0.00232769	0.000399584	0.0019911	0.000187335		0.000589283	0.000394014	0.000933274	0.000476833		0.00432116	0.00435769	0.00819399	0.00876127		0.00496395	0.00269949	0.0012543	0.000644745			0.000796162	0.000796162	0.000210571	0.000210571
C14H18NO3+	248.128	2	8.98757e-05	0.000179751	7.18903e-05	0.000143781		0.00131766	0.000221105	0.00115444	0.000114057		0.000523023	0.000270375	0.000839973	0.000263347		0.00295772	0.00295786	0.00552417	0.00571299		0.0072396	0.0068029	0.00206536	0.00219501			0.000240072	0.000240072	6.53927e-05	6.53927e-05
C11H22NO5+	248.149	2	0.000434786	0.000589947	0.000354809	0.000475102		0.00181238	0.000352963	0.00154527	0.000180857		0.00029172	0.000165737	0.000460438	0.000151752		0.00297481	0.00302457	0.0056795	0.00617811		0.00297553	0.00103172	0.000822336	0.000407688			0.000480149	0.000480149	0.000126736	0.000126736
C15H22NO2+	248.165	2	5.71322e-05	0.000114264	4.57059e-05	9.14119e-05		0.000901291	0.00018358	0.000785509	0.000102886		0.000218476	9.91481e-05	0.00034943	9.05551e-05		0.000990951	0.00100825	0.00189297	0.00206189		0.00283642	0.00116454	0.000798008	0.000400587			0.00010895	0.00010895	2.95638e-05	2.95638e-05
C12H26NO4+	248.186	2	4.73619e-05	9.47239e-05	3.7893e-05	7.57859e-05		0.000180931	9.68352e-06	0.000164318	1.33689e-05		1.2157e-05	5.28059e-06	1.91699e-05	5.34587e-06		0.000217825	0.000229431	0.000423537	0.000485753		0.000890396	0.00019642	0.000247774	9.28486e-05			8.27356e-05	8.27356e-05	2.17672e-05	2.17672e-05
C16H26NO+	248.201	2	0	0	0	0		0.000338748	4.59223e-05	0.00030895	3.20233e-05		6.48086e-05	1.607e-05	0.000114455	4.05874e-05		0.000205648	0.000207859	0.000390915	0.000420179		0.000943675	0.000296051	0.000253913	8.86842e-05			9.40896e-05	9.40896e-05	2.70334e-05	2.70334e-05
C12H9O6+	249.039	2	9.06887e-05	6.68101e-05	9.029e-05	5.05201e-05		0.000142378	2.8491e-05	0.00012594	1.66564e-05		4.80768e-05	2.34581e-05	7.28774e-05	1.26296e-05		8.36581e-05	8.40253e-05	0.000158504	0.000167627		0.000133671	5.64277e-05	3.53986e-05	1.24771e-05			0.000120751	0.000120751	3.25386e-05	3.25386e-05
C9H13O8+	249.06	2	0.000534003	0.000408642	0.000563092	0.00028867		0.00126816	0.000389011	0.00105308	0.000239981		0.000453471	0.000211832	0.000818674	0.000474286		0.000608855	0.000625844	0.00117457	0.00130179		0.00054062	0.000565599	0.000133042	0.000127274			0.00114823	0.00114823	0.000299001	0.000299001
C13H13O5+	249.076	2	0.00210379	0.00105585	0.00252748	0.000969455		0.00214292	0.000387466	0.0018077	0.00018722		0.000628225	0.000504723	0.00084226	0.00014815		0.00237597	0.00240758	0.00454186	0.00490804		0.000652896	0.000570975	0.000185709	0.000186414			0.00085699	0.00085699	0.000231799	0.000231799
C17H13O2+	249.091	2	0.00113569	0.000827729	0.00115054	0.000602101		0.00145478	0.000325457	0.00124422	0.000181145		0.000372031	0.000111806	0.000748086	0.000532972		0.00177656	0.00178862	0.00337637	0.00359508		0.00198731	0.00194501	0.000489676	0.000442023			0.00128589	0.00128589	0.000345886	0.000345886
C14H17O4+	249.112	2	0.000943102	0.0018541	0.000758039	0.00148866		0.00736398	0.00132131	0.0063811	0.000663952		0.00305451	0.00201662	0.00467831	0.00158054		0.00849916	0.00858709	0.0162099	0.0174078		0.00462893	0.00372382	0.00128263	0.00114019			0.0025156	0.0025156	0.000685337	0.000685337
C18H17O+	249.127	2	0.000910636	0.00110916	0.000764148	0.000891995		0.00246529	0.000349579	0.00207553	0.00014763		0.000179369	0.000180923	0.0002124	7.21214e-05		0.0029834	0.002995	0.00565061	0.00596633		0.0035195	0.0025199	0.000981515	0.000840541			0.00137913	0.00137913	0.000365036	0.000365036
C15H21O3+	249.149	2	0.00226764	0.00453529	0.00182134	0.00364269		0.0160352	0.00303891	0.0141253	0.00169864		0.00646569	0.00315918	0.0105879	0.00357792		0.0120746	0.012195	0.0230249	0.0247058		0.00902783	0.00303313	0.00238739	0.000788849			0.00491366	0.00491366	0.00135534	0.00135534
C19H21+	249.164	2	0.0358511	0.0203417	0.0389911	0.0129516		0.0511069	0.00784465	0.0437316	0.00327803		0.00781324	0.00445986	0.011686	0.00261773		0.0267683	0.0268583	0.0506675	0.0534036		0.0167842	0.0188816	0.0049386	0.00603692			0.00748134	0.00748134	0.00199072	0.00199072
C17H29O+	249.221	2	3.12385e-05	6.2477e-05	2.50977e-05	5.01955e-05		0.00070606	0.000110344	0.000639338	6.95561e-05		6.07085e-05	1.1707e-05	0.000118592	5.33328e-05		0.000321876	0.000329031	0.000619365	0.000680265		0.00061684	0.000127594	0.000163292	2.08471e-05			0.000482917	0.000482917	0.000138467	0.000138467
C18H33+	249.258	2	0	0	0	0		0.00065768	9.61054e-05	0.000603081	6.77277e-05		4.89965e-05	2.35617e-05	0.000102016	6.4557e-05		0.000316307	0.000328472	0.000613865	0.000690787		0.00149148	0.000446975	0.000395161	9.08306e-05			0.000597657	0.000597657	0.000173542	0.000173542
C12H12NO5+	250.071	2	0.00126556	0.000805913	0.00145372	0.000577744		0.00129644	0.000284734	0.00110655	0.000156371		0.000401416	0.000185647	0.000666829	0.000255755		0.000535594	0.000535597	0.00100652	0.00103775		0.00174216	0.00214779	0.000437565	0.000488816			0.000484504	0.000484504	0.000128469	0.000128469
C16H12NO2+	250.086	2	0.000550275	0.000313161	0.000610956	0.000231214		0.000965434	0.000293074	0.000808568	0.000181131		0.000206815	0.000161682	0.000314514	0.000136015		0.0014761	0.00148419	0.00281242	0.00298397		0.00155303	0.000762294	0.000399415	0.000176009			0.000290846	0.000290846	7.82676e-05	7.82676e-05
C10H20NO6+	250.129	2	0.000122769	0.000245538	9.89959e-05	0.000197992		0.000890232	0.000122785	0.00079253	5.9489e-05		0.000254451	0.000147428	0.000393066	8.93285e-05		0.00237307	0.00239008	0.00453076	0.00482906		0.003205	0.00155812	0.000844387	0.000404481			0.000193723	0.000193723	5.24328e-05	5.24328e-05
C14H20NO3+	250.144	2	0.000111196	0.000222391	8.96692e-05	0.000179338		0.000916622	0.000127414	0.000808585	5.58342e-05		0.00021861	0.000123817	0.000369316	0.000193391		0.00164743	0.00165883	0.0031447	0.00334958		0.00479175	0.0051861	0.00139867	0.00162566			0.000171576	0.000171576	4.75189e-05	4.75189e-05
C11H24NO5+	250.165	2	0.00020823	0.00041646	0.000167933	0.000335866		0.00214167	0.000376588	0.00191235	0.000215421		0.000529834	0.000207543	0.000894484	0.00030295		0.00130678	0.00134804	0.00253701	0.00282729		0.00233934	0.000648718	0.000665179	0.000302502			0.000233241	0.000233241	6.30367e-05	6.30367e-05
C15H24NO2+	250.18	2	9.40213e-06	1.88043e-05	7.58307e-06	1.51661e-05		0.000937258	9.59853e-05	0.000840291	4.05716e-05		0.000114893	4.83645e-05	0.000186141	4.88411e-05		0.000292638	0.000293792	0.000556656	0.000587861		0.00131741	0.000303404	0.000373371	0.000143973			0.000140665	0.000140665	3.92021e-05	3.92021e-05
C16H28NO+	250.217	2	1.19055e-05	2.38111e-05	9.60354e-06	1.92071e-05		0.000171266	3.43957e-05	0.000152499	2.04057e-05		3.25695e-05	1.55701e-05	5.31452e-05	1.46456e-05		0.000171322	0.000172508	0.000327125	0.000348439		0.000906081	0.000216715	0.000244685	5.49885e-05			7.22489e-05	7.22489e-05	2.0004e-05	2.0004e-05
C17H32N+	250.253	2	7.18018e-07	1.43604e-06	5.7927e-07	1.15854e-06		0.00024464	7.83636e-05	0.000218118	5.25075e-05		3.12993e-05	5.72338e-06	6.2361e-05	3.42278e-05		0.000644815	0.000647645	0.00122768	0.00129834		0.00176696	0.000475997	0.000468546	8.16268e-05			0.000178614	0.000178614	5.06671e-05	5.06671e-05
C12H11O6+	251.055	2	0.000144096	0.000151329	0.000127636	0.000120895		0.000637975	0.000109604	0.000556271	5.33134e-05		0.000199206	9.9286e-05	0.000321999	9.84435e-05		0.000208975	0.000220862	0.000411614	0.000474117		0.000157844	0.000153703	3.99027e-05	3.49573e-05			0.000324572	0.000324572	8.61647e-05	8.61647e-05
C13H15O5+	251.091	2	0.00151302	0.00111268	0.00153453	0.000877757		0.00244626	0.000362431	0.00212305	0.000148444		0.00130982	0.000843357	0.00201917	0.000659935		0.00281148	0.00274247	0.00531795	0.005585		0.000760746	0.000504973	0.000199731	0.000127947			0.000916955	0.000916955	0.000251024	0.000251024
C17H15O2+	251.107	2	0.00241381	0.00146076	0.0026148	0.000966926		0.00330421	0.000678836	0.00280771	0.000358794		0.000715274	0.000399331	0.00111854	0.000272394		0.00563839	0.00566323	0.0107721	0.0113928		0.00360021	0.00310202	0.00103402	0.00100861			0.0010956	0.0010956	0.000289836	0.000289836
C14H19O4+	251.128	2	0.000760152	0.0015203	0.000615415	0.00123083		0.00489426	0.000800561	0.00431085	0.000393007		0.00248792	0.00134384	0.00401408	0.00132963		0.00448208	0.00460396	0.00871532	0.00964873		0.00318185	0.00168427	0.000876789	0.000547043			0.00193841	0.00193841	0.000537251	0.000537251
C18H19O+	251.143	2	0.000618722	0.00116208	0.000502535	0.000940237		0.00407487	0.0005456	0.00349727	0.000200643		0.000436216	0.000485096	0.000475105	0.000239791		0.00370498	0.00370937	0.00703908	0.00735162		0.0029337	0.0024268	0.0008503	0.000832641			0.00164041	0.00164041	0.000439344	0.000439344
C15H23O3+	251.164	2	0.000292068	0.000584135	0.000236491	0.000472981		0.00257893	0.000753054	0.00236224	0.000525956		0.000624502	0.000120895	0.00131292	0.000781371		0.00121252	0.00130665	0.00240666	0.00283698		0.00101125	0.000424286	0.000271937	0.00010948			0.000868938	0.000868938	0.000240852	0.000240852
C19H23+	251.179	2	0.00100598	0.00201196	0.000814605	0.00162921		0.0214882	0.00315762	0.0191298	0.00154282		0.00428863	0.00204902	0.00686726	0.00258918		0.00242931	0.00243918	0.00464035	0.00490235		0.00260461	0.00195187	0.000773046	0.000646875			0.00185373	0.00185373	0.000515883	0.000515883
C16H27O2+	251.201	2	0.000162447	0.000324895	0.000131555	0.000263109		0.00370392	0.000472355	0.00329498	0.000198628		0.000192503	9.63388e-05	0.00029967	8.69915e-05		0.000681441	0.000717474	0.00134094	0.00153716		0.00106589	0.000205161	0.000300824	0.000102036			0.000694393	0.000694393	0.000195128	0.000195128
C17H31O+	251.237	2	1.58125e-05	3.16249e-05	1.28073e-05	2.56145e-05		0.000936614	0.000200688	0.000839614	0.000123577		4.7424e-06	4.56812e-06	1.06455e-05	1.36208e-05		0.000657662	0.000672027	0.00127548	0.00139998		0.00125943	0.000334136	0.000336789	5.75955e-05			0.00062728	0.00062728	0.000182186	0.000182186
C18H35+	251.273	2	0	0	0	0		0.000572256	9.1793e-05	0.000534224	7.01747e-05		7.65222e-06	8.79906e-06	1.74519e-05	2.1929e-05		0.000137903	0.000139963	0.000267169	0.000298529		0.000872932	0.000353355	0.000233282	7.46449e-05			0.000837076	0.000837076	0.000247261	0.000247261
C12H14NO5+	252.087	2	0.00124936	0.000735497	0.00147056	0.000528072		0.00160855	0.00039328	0.00139212	0.000230721		0.000424855	0.000181587	0.000706305	0.000204812		0.00137191	0.00143328	0.00270026	0.00306401		0.00211822	0.00199966	0.000547175	0.000474871			0.000379276	0.000379276	0.000102555	0.000102555
C9H18NO7+	252.108	2	0.00056772	0.000306081	0.000644172	0.00014349		0.00110474	0.000290966	0.000936266	0.000173087		0.000388423	0.000236927	0.000634244	0.000251665		0.00272455	0.00272611	0.00518656	0.00539602		0.00195759	0.00215519	0.000466625	0.000511932			0.000283761	0.000283761	7.66585e-05	7.66585e-05
C13H18NO4+	252.123	2	0.000510717	0.00102143	0.000415119	0.000830238		0.00422789	0.000642021	0.00374517	0.000299915		0.00130816	0.000938712	0.00200282	0.000696117		0.00580995	0.00591977	0.011287	0.0123263		0.0176618	0.0148026	0.00511702	0.0048515			0.000820686	0.000820686	0.000226033	0.000226033
C10H22NO6+	252.144	2	0.000129338	0.000258675	0.000105136	0.000210273		0.000590496	0.000139222	0.000531713	8.86451e-05		0.000186895	0.000111264	0.000299577	0.000105268		0.00106713	0.0010706	0.0020438	0.00215338		0.00186936	0.00124289	0.000506275	0.00029093			0.000150839	0.000150839	4.13256e-05	4.13256e-05
C14H22NO3+	252.159	2	1.82474e-05	3.64947e-05	1.48339e-05	2.96678e-05		7.85409e-05	1.01421e-05	6.78043e-05	7.17691e-06		2.42719e-06	5.42736e-06	1.55796e-06	3.4837e-06		0.000146927	0.000155281	0.000290674	0.000334801		0.000541133	0.00015436	0.000153499	6.42285e-05			2.32776e-05	2.32776e-05	6.45206e-06	6.45206e-06
C18H22N+	252.175	2	0.000396024	0.000792048	0.000321961	0.000643922		0.00152473	0.000388104	0.0013455	0.000239257		0.00035231	9.72492e-05	0.000630143	0.000220042		0.000626068	0.000626069	0.00118729	0.00122565		0.002883	0.00272329	0.000853385	0.000917995			0.000100591	0.000100591	2.80311e-05	2.80311e-05
C15H26NO2+	252.196	2	7.92005e-05	0.000158401	6.43941e-05	0.000128788		0.00115608	0.000141792	0.00102875	5.33457e-05		0.000113553	6.27246e-05	0.000171959	4.92817e-05		0.000270378	0.000273101	0.000521956	0.000560185		0.0010414	0.000394315	0.000306676	0.000163676			8.63158e-05	8.63158e-05	2.49594e-05	2.49594e-05
C16H30NO+	252.232	2	0.000126745	0.000253491	0.000103065	0.000206131		0.0011148	0.000207311	0.000991923	0.000114879		0.000229654	6.93574e-05	0.000406128	0.000138061		0.000993544	0.000994534	0.00189488	0.0019769		0.00311188	0.000773883	0.000856627	0.000210768			0.000520838	0.000520838	0.000147271	0.000147271
C17H34N+	252.269	2	0	0	0	0		0.000330178	6.39168e-05	0.000295902	3.73768e-05		4.19285e-05	1.14331e-05	8.34577e-05	4.1569e-05		0.00032159	0.000325938	0.000597155	0.000599642		0.00170724	0.000476562	0.000470968	0.000128172			0.000260607	0.000260607	7.65177e-05	7.65177e-05
C8H13O9+	253.055	2	4.24723e-05	8.49446e-05	3.46503e-05	6.93007e-05		0.00128271	0.000200283	0.00115691	0.000108126		0.000197709	6.23342e-05	0.000369896	0.000161387		0.000288979	0.000295238	0.000564459	0.00061937		0.000260502	0.00025087	6.60922e-05	5.79903e-05			0.000414104	0.000414104	0.000112148	0.000112148
C12H13O6+	253.071	2	0.000181603	0.00023491	0.000158831	0.000188905		0.00156861	0.000306887	0.00138924	0.000169497		0.00044916	0.00031812	0.000672428	0.000180411		0.000514522	0.000553537	0.00102842	0.00120999		0.000229781	0.000226709	5.79111e-05	5.30465e-05			0.000450272	0.000450272	0.00012247	0.00012247
C16H13O3+	253.086	2	0.000889346	0.000467983	0.00104717	0.000341038		0.000881932	0.000154223	0.00074743	7.61217e-05		0.000122421	1.81677e-05	0.000265902	0.000163518		0.00160829	0.00161031	0.00307985	0.00321776		0.00137256	0.000983192	0.000363034	0.000244547			0.000516615	0.000516615	0.000139844	0.000139844
C13H17O5+	253.107	2	0.00129166	0.00160359	0.00108486	0.00133249		0.0062783	0.00139936	0.00554023	0.00081541		0.00280589	0.00190819	0.00436126	0.00162282		0.00645874	0.00649177	0.0124495	0.0131949		0.00216644	0.00114789	0.000569384	0.000285016			0.00240711	0.00240711	0.000666991	0.000666991
C17H17O2+	253.122	2	0.00263117	0.00252446	0.00241354	0.00212662		0.00463703	0.00068735	0.00397394	0.000294073		0.00100733	0.000603775	0.00156124	0.000331911		0.00684525	0.00692196	0.0132763	0.0142842		0.00559152	0.00516512	0.00165814	0.0017443			0.00131158	0.00131158	0.000355922	0.000355922
C14H21O4+	253.143	2	0.000693748	0.0013875	0.000566181	0.00113236		0.00513319	0.00115107	0.00459614	0.000701883		0.00226961	0.00123144	0.00365423	0.00116183		0.00300479	0.00304302	0.00583544	0.00629848		0.0017241	0.000691599	0.000486337	0.000250288			0.00170561	0.00170561	0.000476631	0.000476631
C18H21O+	253.159	2	0.000511376	0.00102275	0.000417369	0.000834737		0.00386288	0.000521249	0.00331735	0.000360556		0.000230756	0.000359219	0.000191153	0.000226021		0.00334563	0.00336879	0.0064636	0.00688472		0.00329198	0.00229939	0.00094367	0.000756398			0.00149134	0.00149134	0.000405462	0.000405462
C15H25O3+	253.18	2	0.00050024	0.00100048	0.000408314	0.000816628		0.00552033	0.00249016	0.0051905	0.00185284		0.00173042	0.000414343	0.00352805	0.00178719		0.000747604	0.000769787	0.00146755	0.00163087		0.00226489	0.00214313	0.0006389	0.000678286			0.00141991	0.00141991	0.000399423	0.000399423
C19H25+	253.195	2	0.000778173	0.00155635	0.000635212	0.00127042		0.107114	0.0154289	0.0970411	0.00827244		0.0157935	0.00752702	0.0260714	0.0116674		0.00606656	0.00612504	0.0117533	0.0126019		0.00939224	0.00510541	0.00280635	0.00176641			0.00677037	0.00677037	0.00193316	0.00193316
C16H29O2+	253.216	2	0.000116642	0.000233284	9.52212e-05	0.000190442		0.0188149	0.00256228	0.0168165	0.00112184		0.000685245	0.000452699	0.000979831	0.000311971		0.00199403	0.00201625	0.00386864	0.00416177		0.00280565	0.000911978	0.000817102	0.000373235			0.001883	0.001883	0.000536382	0.000536382
C17H33O+	253.253	2	8.41684e-05	0.000168337	6.87211e-05	0.000137442		0.00204119	0.000674777	0.00174344	0.000433556		3.35545e-05	2.5212e-05	7.29843e-05	8.19828e-05		0.00194711	0.00194979	0.0037323	0.00390194		0.00263877	0.000495775	0.000717858	6.17277e-05			0.00180972	0.00180972	0.000520539	0.000520539
C18H37+	253.289	2	0	0	0	0		0.00106274	0.000160698	0.000985089	0.000109444		0.00011438	6.42075e-05	0.000206986	0.000137218		0.000346662	0.000344601	0.000662662	0.000691978		0.00164514	0.000759361	0.000446526	0.000169566			0.00262936	0.00262936	0.000777001	0.000777001
C15H12NO3+	254.081	2	6.69381e-05	0.000133876	5.48326e-05	0.000109665		0.00135673	0.000303658	0.00119781	0.000176481		0.000433618	0.000229161	0.000702439	0.000199291		0.00202423	0.00202714	0.00389343	0.00407162		0.00192451	0.00118173	0.000524724	0.000329857			0.000306686	0.000306686	8.35621e-05	8.35621e-05
C16H16NO2+	254.118	2	0.000439023	0.00059027	0.000367132	0.000487261		0.00123885	0.000253965	0.00107266	0.00013612		0.000494472	0.000306921	0.000788458	0.00028612		0.00375296	0.00377187	0.0072623	0.00769541		0.00398355	0.00219935	0.00109114	0.000645505			0.000304963	0.000304963	8.07784e-05	8.07784e-05
C13H20NO4+	254.139	2	8.66524e-05	0.000173305	7.09978e-05	0.000141996		0.000909494	0.000111542	0.000810562	3.82037e-05		0.000360666	0.000161042	0.000612199	0.000216183		0.00129561	0.00130856	0.00252031	0.00270445		0.00400608	0.0029553	0.00119221	0.00103508			0.000179196	0.000179196	5.09247e-05	5.09247e-05
C17H20NO+	254.154	2	0.000118234	0.000236468	9.68795e-05	0.000193759		0.000505104	0.000132332	0.000435011	7.94743e-05		0.00011141	0.000104556	0.000154414	7.11439e-05		0.00114078	0.00115478	0.00222353	0.00239774		0.00117816	0.000574672	0.000346206	0.000216265			0.000154669	0.000154669	4.26541e-05	4.26541e-05
C18H24N+	254.19	2	0.000198323	0.000396646	0.000162527	0.000325054		0.0083362	0.00155176	0.00778826	0.00110071		0.00132617	0.000513147	0.00245513	0.00113213		0.000886895	0.000887249	0.00170113	0.00176733		0.00210428	0.00154885	0.000631861	0.000528752			0.000457017	0.000457017	0.000132191	0.000132191
C15H28NO2+	254.211	2	0	0	0	0		0.013041	0.00100067	0.0120978	0.000690661		0.000337137	0.000206663	0.000539418	0.000434971		0.000684292	0.000708165	0.00135226	0.00151419		0.00292945	0.00210195	0.000884911	0.000719577			0.000308873	0.000308873	8.81859e-05	8.81859e-05
C16H32NO+	254.248	2	3.3011e-05	6.6022e-05	2.70589e-05	5.41178e-05		0.00107435	0.000139793	0.000961993	5.63475e-05		8.63499e-05	5.62649e-05	0.000134683	4.66418e-05		0.000867874	0.000869134	0.00167044	0.00174703		0.00568154	0.00124269	0.00158077	0.000298419			0.000651403	0.000651403	0.00018553	0.00018553
C17H36N+	254.284	2	0	0	0	0		0.000149404	4.5455e-05	0.000144907	3.63343e-05		1.76057e-05	9.68394e-06	3.60956e-05	3.0188e-05		0.00014279	0.000143513	0.000276501	0.000293014		0.00350052	0.00100232	0.000969146	0.000250862			0.000349051	0.000349051	0.000102298	0.000102298
C7H11O10+	255.035	2	1.06621e-05	2.13242e-05	8.76681e-06	1.75336e-05		0.000179034	1.62377e-05	0.000182114	3.24738e-05		7.28734e-05	1.84195e-05	0.00013826	5.82112e-05		0.000183651	0.000141002	0.000127501	8.03768e-05		0.000249261	0.000119129	7.40978e-05	4.3162e-05			5.15151e-05	5.15151e-05	1.55314e-05	1.55314e-05
C11H11O7+	255.05	2	5.87194e-05	7.23968e-05	6.19705e-05	7.71811e-05		0.00220035	0.000365374	0.00203135	0.000231012		0.000190104	7.87906e-05	0.000341822	0.000146987		0.000286908	0.000289802	0.000560168	0.000601218		0.000254583	0.00041507	6.30055e-05	0.000100282			0.000346493	0.000346493	9.60422e-05	9.60422e-05
C12H15O6+	255.086	2	0.000729553	0.000660995	0.000704188	0.000566844		0.00513827	0.000870331	0.00464807	0.000477339		0.00104207	0.00050581	0.00170482	0.00045077		0.0018708	0.0014683	0.00330962	0.00322628		0.000802757	0.00096892	0.000195868	0.000235602			0.000922102	0.000922102	0.000256031	0.000256031
C16H15O3+	255.102	2	0.00363377	0.00163365	0.00442478	0.00138207		0.00216858	0.000401836	0.00181892	0.000221847		0.000471006	0.000244754	0.000806094	0.00033928		0.00634961	0.00641658	0.0124047	0.0133274		0.00364076	0.00287917	0.00106593	0.000962054			0.00114804	0.00114804	0.000308683	0.000308683
C13H19O5+	255.123	2	0.00120103	0.00129827	0.00106473	0.00107048		0.00365621	0.000854884	0.0032231	0.000502946		0.00150095	0.00108666	0.00232726	0.000971797		0.00339926	0.00343003	0.00663247	0.00710169		0.00180762	0.00100486	0.000475963	0.000233313			0.00141153	0.00141153	0.000392079	0.000392079
C17H19O2+	255.138	2	0.000997779	0.00121323	0.000873063	0.000986744		0.00289895	0.000402239	0.00250297	0.000171057		0.000871858	0.000408816	0.00144462	0.000377564		0.0052951	0.00533422	0.0103153	0.0110005		0.00348356	0.00358833	0.00105466	0.00118671			0.00092401	0.00092401	0.000256975	0.000256975
C14H23O4+	255.159	2	0.000286059	0.000572118	0.000235324	0.000470648		0.00259385	0.000674294	0.00232647	0.000427549		0.00074526	0.000585875	0.0010322	0.000332314		0.000850861	0.000861385	0.00166515	0.00179597		0.000576906	0.00045188	0.000154219	0.000111261			0.000602526	0.000602526	0.000170161	0.000170161
C18H23O+	255.174	2	0.000589605	0.00117921	0.000485063	0.000970127		0.00264127	0.000683975	0.00226001	0.00057691		2.59311e-05	5.52075e-05	1.76524e-05	3.55391e-05		0.00323366	0.00326134	0.0063077	0.00674606		0.00309488	0.00184824	0.000908205	0.000623867			0.000903458	0.000903458	0.000257284	0.000257284
C15H27O3+	255.195	2	0.000380459	0.000760918	0.000313027	0.000626053		0.0168357	0.00741947	0.0163581	0.00576637		0.00374713	0.00120004	0.00810542	0.00447145		0.00060391	0.000612235	0.00118334	0.00127999		0.00477041	0.00567706	0.00141539	0.00186064			0.00328246	0.00328246	0.000941456	0.000941456
C19H27+	255.211	2	0	0	0	0		0.246197	0.0294532	0.229544	0.0197272		0.0243685	0.0107335	0.0426194	0.0204525		0.0073617	0.00743411	0.0143791	0.0154241		0.0148677	0.0115333	0.00453398	0.00391593			0.013949	0.013949	0.0040389	0.0040389
C16H31O2+	255.232	2	0.000106529	0.000213059	8.76607e-05	0.000175321		0.0363271	0.00397204	0.0333062	0.00191943		0.000691143	0.000512926	0.000922531	0.000416699		0.00425216	0.00428088	0.00828102	0.00881672		0.00360743	0.0019475	0.00107521	0.000701014			0.00286604	0.00286604	0.00082397	0.00082397
C17H35O+	255.268	2	4.27634e-05	8.55269e-05	3.51941e-05	7.03883e-05		0.000147992	0.000109398	0.000112978	7.97962e-05		1.34444e-05	1.86877e-05	1.45977e-05	1.52786e-05		0.00177972	0.00121197	0.0029646	0.00268285		0.00057366	0.000166877	0.000158319	4.1756e-05			0.000791446	0.000791446	0.000228815	0.000228815
C15H14NO3+	256.097	2	0.000263817	0.000311628	0.000237801	0.000267957		0.00102504	0.000182118	0.000910306	9.22917e-05		0.000282685	0.000180316	0.000451578	0.000163015		0.00127093	0.00129505	0.00250824	0.00273955		0.00126175	0.00122677	0.000316383	0.000295755			0.000202692	0.000202692	5.83779e-05	5.83779e-05
C19H14N+	256.112	2	2.16837e-05	4.33674e-05	1.79048e-05	3.58096e-05		0.000185353	2.77382e-05	0.000169484	1.50224e-05		4.43057e-05	1.19318e-05	8.37324e-05	4.10954e-05		0.000494386	0.000496037	0.000961949	0.00101381		0.000795345	0.000565317	0.000234475	0.00019971			6.87875e-05	6.87875e-05	1.89465e-05	1.89465e-05
C16H18NO2+	256.133	2	9.7161e-05	0.000194322	8.02351e-05	0.00016047		0.00037154	7.68983e-05	0.00032233	4.1643e-05		0.000117179	9.29554e-05	0.000165951	4.08072e-05		0.00099207	0.00100362	0.0019478	0.00209764		0.00130338	0.000837053	0.000376295	0.000281695			7.77012e-05	7.77012e-05	2.14997e-05	2.14997e-05
C13H22NO4+	256.154	2	3.06067e-05	6.12134e-05	2.5277e-05	5.05539e-05		0.000253595	1.42404e-05	0.000234726	7.86955e-06		0.00010421	1.88953e-05	0.000200714	9.16193e-05		0.000362929	0.000363338	0.000694786	0.000709685		0.0011652	0.000892464	0.000360057	0.000337331			5.05255e-05	5.05255e-05	1.42354e-05	1.42354e-05
C17H22NO+	256.17	2	0.000253061	0.000506121	0.000209006	0.000418012		0.00118502	0.000447634	0.000991298	0.000298773		0.000177568	0.000213321	0.000195878	0.000112279		0.00158529	0.00158768	0.00307483	0.00321667		0.00301615	0.00128061	0.000907194	0.000491594			0.000267205	0.000267205	7.44286e-05	7.44286e-05
C18H26N+	256.206	2	0.000112887	0.000225775	9.32484e-05	0.000186497		0.016006	0.00260428	0.0154603	0.00225655		0.00188433	0.000617336	0.00372422	0.00173862		0.00117963	0.0012158	0.0023446	0.00260937		0.00501985	0.00272899	0.00148779	0.000976532			0.0011534	0.0011534	0.000340197	0.000340197
C15H30NO2+	256.227	2	0	0	0	0		0.00649245	0.000316038	0.00620648	0.000631443		0	0	0	0		0.00161733	0.00161913	0.00313463	0.00327254		0.00238544	0.00145762	0.000728107	0.000519108			0.000313368	0.000313368	9.34283e-05	9.34283e-05
C16H34NO+	256.263	2	3.47711e-05	6.95422e-05	2.87285e-05	5.7457e-05		0.00138019	0.000183175	0.00124565	7.64495e-05		0.000218337	7.68172e-05	0.000375034	0.000111098		0.00178822	0.00181272	0.00351845	0.0038052		0.00263316	0.000632225	0.000726039	6.60066e-05			0.000501848	0.000501848	0.000143585	0.000143585
C18H9O2+	257.06	2	0.000305212	0.000241505	0.000329924	0.000180967		0.0014228	0.000190833	0.00133913	0.000132284		0.000244038	0.000111762	0.000419871	0.000148383		0.000461295	0.000463478	0.000902669	0.000955633		0.000597365	0.0004351	0.000161783	0.000105494			0.000493762	0.000493762	0.00013597	0.00013597
C12H17O6+	257.102	2	0.0012557	0.00115738	0.00120199	0.000938623		0.00513107	0.000800863	0.00476241	0.000491384		0.0010954	0.000480953	0.00190328	0.00069097		0.00268811	0.0023529	0.00503434	0.00524178		0.00206409	0.00217199	0.000524702	0.000527568			0.00139441	0.00139441	0.000386355	0.000386355
C16H17O3+	257.117	2	0.00184341	0.00106489	0.00203634	0.000687971		0.00262442	0.000433165	0.00225122	0.000217328		0.000723685	0.000458696	0.00113025	0.000273545		0.00630909	0.00633834	0.0123469	0.0130676		0.00318533	0.00358732	0.000985549	0.00117862			0.00104851	0.00104851	0.000290447	0.000290447
C13H21O5+	257.138	2	0.000488131	0.0008714	0.000406991	0.000721732		0.00238688	0.000554857	0.00216865	0.000346765		0.000784641	0.000437706	0.0012466	0.000366084		0.00163012	0.00165088	0.00321596	0.00347127		0.00152696	0.000830673	0.000423273	0.000208011			0.00113776	0.00113776	0.000316089	0.000316089
C17H21O2+	257.154	2	0.000692674	0.00138535	0.000574295	0.00114859		0.00483185	0.000653679	0.00425067	0.000246534		0.00161542	0.000799812	0.00270583	0.000811126		0.00604249	0.00611969	0.0119219	0.0128694		0.00372011	0.00372812	0.00114301	0.00126288			0.00134684	0.00134684	0.000379094	0.000379094
C14H25O4+	257.175	2	0.000361981	0.000723961	0.000300142	0.000600285		0.0031741	0.000889536	0.00293112	0.000608401		0.00090618	0.000613624	0.00130604	0.000450164		0.00100275	0.00101196	0.00197256	0.00211276		0.000904675	0.000148266	0.000256431	2.79843e-05			0.000702067	0.000702067	0.000202196	0.000202196
C18H25O+	257.19	2	0.00147567	0.00295134	0.00122365	0.0024473		0.00996785	0.0016153	0.00854519	0.0012269		0.000157355	0.000276671	0.000135635	0.00017601		0.00714049	0.00718972	0.0140152	0.0149273		0.00724252	0.00393764	0.00211045	0.00129982			0.00314091	0.00314091	0.000907022	0.000907022
C15H29O3+	257.211	2	0.0003382	0.000676399	0.000280464	0.000560927		0.0176585	0.00710849	0.0178734	0.00595427		0.00401832	0.0010742	0.00895235	0.00517883		0.000763462	0.000797994	0.00153367	0.00174139		0.00386551	0.00378549	0.00112473	0.00122084			0.00392547	0.00392547	0.00114875	0.00114875
C19H29+	257.226	2	3.06078e-05	6.12157e-05	2.53841e-05	5.07683e-05		0.143255	0.00817109	0.139472	0.0144139		0.00600061	0.00338044	0.0125629	0.00792899		0.0047696	0.00481452	0.00938642	0.010059		0.00811344	0.00441188	0.0024463	0.00151674			0.0104174	0.0104174	0.0030885	0.0030885
C16H33O2+	257.248	2	7.39044e-05	0.000147809	6.12965e-05	0.000122593		0.0236424	0.000782336	0.0225853	0.00165482		0.000108083	0.000116795	0.000125952	0.000108991		0.00283674	0.00285681	0.00557022	0.00593547		0.00180574	0.000888803	0.000550839	0.000337055			0.00229305	0.00229305	0.000676199	0.000676199
C15H16NO3+	258.112	2	5.93207e-05	0.000118641	4.93668e-05	9.87336e-05		0.000479618	9.34027e-05	0.000439577	5.58748e-05		0.00012464	7.15783e-05	0.000201414	6.02441e-05		0.00115086	0.00115319	0.00225169	0.00236114		0.00172649	0.000942092	0.000486232	0.000280802			0.000104247	0.000104247	2.93078e-05	2.93078e-05
C19H16N+	258.128	2	8.11363e-05	0.000162273	6.75258e-05	0.000135052		0.000564381	0.000109626	0.000503955	5.92171e-05		0.000168396	9.53998e-05	0.000277565	8.83716e-05		0.00148626	0.00151081	0.00295169	0.00320957		0.00190207	0.00138669	0.000564155	0.000471801			0.000163967	0.000163967	4.54884e-05	4.54884e-05
C16H20NO2+	258.149	2	0.000199345	0.000398691	0.000165919	0.000331838		0.00103148	0.000148767	0.000914455	5.98752e-05		0.000293749	0.000169712	0.000463357	0.000123743		0.00232715	0.00234338	0.00458518	0.00488454		0.00482953	0.00374294	0.00144494	0.00127701			0.000190212	0.000190212	5.42367e-05	5.42367e-05
C13H24NO4+	258.17	2	5.16913e-05	0.000103383	4.30273e-05	8.60545e-05		0.000370187	3.26359e-05	0.000342742	1.2408e-05		0.000149922	3.11315e-05	0.000294301	0.000133763		0.000519189	0.000520781	0.00101792	0.00107177		0.00179602	0.000827098	0.000533239	0.000308746			0.000134852	0.000134852	3.87955e-05	3.87955e-05
C17H24NO+	258.185	2	0.000150922	0.000301843	0.000125633	0.000251266		0.00155309	0.000203436	0.00143247	0.000102535		0.000194222	0.000159368	0.000261087	0.000120674		0.00122993	0.00127779	0.0024733	0.00278493		0.00181817	0.00100436	0.000546526	0.000320126			0.000303205	0.000303205	8.83474e-05	8.83474e-05
C14H28NO3+	258.206	2	1.67943e-05	3.35887e-05	1.39814e-05	2.79628e-05		0	0	0	0		1.69897e-05	1.37047e-05	3.43234e-05	2.63955e-05		0.000795855	0.000822737	0.00159669	0.00178507		0.00151454	0.00111253	0.000434386	0.000277236			0.000197584	0.000197584	5.56643e-05	5.56643e-05
C18H28N+	258.222	2	5.59525e-05	0.000111905	4.65836e-05	9.31671e-05		0.0043818	0.000609444	0.00443978	0.000762544		0.000705062	0.000141357	0.00141983	0.000662909		0.000632992	0.000639478	0.00125148	0.00134367		0.000880928	0.000596552	0.000250505	0.000186778			0.00052662	0.00052662	0.000157866	0.000157866
C15H32NO2+	258.243	2	1.2312e-05	2.4624e-05	1.02513e-05	2.05025e-05		0.000731477	5.78674e-06	0.000705825	6.11849e-05		3.34589e-05	4.05904e-05	3.5208e-05	3.38678e-05		0.000973912	0.000973915	0.00189055	0.00194971		0.00278474	0.000988585	0.000818879	0.000368685			0.000108371	0.000108371	3.07874e-05	3.07874e-05
C10H11O8+	259.045	2	0.000174482	6.43324e-05	0.0002164	6.31923e-05		0.000527583	0.000136573	0.000475431	8.59631e-05		0.000197721	8.39443e-05	0.000336953	0.000100111		0.000147516	5.86558e-05	0.000187932	0.000183975		0.00023357	0.000125691	6.36344e-05	3.3748e-05			0.000194795	0.000194795	5.25992e-05	5.25992e-05
C7H15O10+	259.066	2	3.51349e-05	4.29508e-05	3.37735e-05	3.7243e-05		0.000134364	2.55143e-05	0.000123222	1.49233e-05		1.59267e-05	6.94641e-06	2.78341e-05	9.94261e-06		0.000130238	0.000134946	0.000244947	0.000244984		0.000394689	0.000446851	0.000108107	0.000110315			0.000202703	0.000202703	5.56204e-05	5.56204e-05
C11H15O7+	259.081	2	0.000863405	0.000553618	0.00102429	0.000449429		0.000941641	0.00018344	0.000838796	9.82639e-05		0.00046283	0.000318576	0.000775603	0.000420695		0.00113571	0.000909802	0.00208577	0.0021827		0.000338153	0.000291369	9.66733e-05	8.07013e-05			0.000582285	0.000582285	0.000159203	0.000159203
C15H15O4+	259.096	2	0.0014811	0.000612473	0.00182572	0.000407304		0.00194025	0.00029513	0.00172714	0.000126999		0.000302117	0.000228859	0.000430419	6.4211e-05		0.00338444	0.00340088	0.00667647	0.00707085		0.00232257	0.00149471	0.000679946	0.000495372			0.000820979	0.000820979	0.000230865	0.000230865
C12H19O6+	259.118	2	0.00110581	0.00088194	0.00111776	0.00070154		0.00166792	0.000342938	0.0015204	0.000202749		0.000612377	0.000163272	0.00118858	0.000617664		0.00159458	0.00161135	0.00316434	0.00339946		0.000973797	0.00103483	0.000247195	0.00025813			0.00115452	0.00115452	0.000320029	0.000320029
C16H19O3+	259.133	2	0.00113064	0.00137296	0.000995157	0.00114057		0.00459979	0.000771436	0.00406702	0.000364653		0.00139015	0.00106498	0.00203124	0.000440721		0.00818601	0.00822526	0.0161495	0.0171003		0.00421439	0.0044826	0.00132006	0.00151818			0.00124672	0.00124672	0.000350815	0.000350815
C20H19+	259.148	2	0.000226922	0.000453844	0.000189606	0.000379211		0.00121594	0.0002972	0.0011098	0.000188595		0.000303048	5.87e-05	0.000612824	0.000306172		0.00088968	0.000924903	0.00179633	0.00202453		0.00131516	0.000679571	0.000395879	0.000264789			0.000685958	0.000685958	0.000192899	0.000192899
C17H23O2+	259.169	2	0.000292719	0.000585438	0.000244602	0.000489205		0.00407538	0.000684358	0.00366837	0.000336876		0.00102595	0.000577235	0.00163957	0.000366173		0.00277484	0.00280139	0.00550297	0.00589932		0.00137576	0.00114638	0.000426404	0.000401421			0.000943902	0.000943902	0.000269475	0.000269475
C14H27O4+	259.19	2	0	0	0	0		0.000863029	0.000260869	0.000847563	0.000208675		0	0	0	0		0.000409919	0.00062366	0.000915454	0.00144601		0.000193577	0.00014457	5.87866e-05	4.17164e-05			0.000313397	0.000313397	9.1681e-05	9.1681e-05
C18H27O+	259.206	2	0.000178672	0.000357344	0.000149324	0.000298647		0.00627187	0.000855458	0.0056114	0.000321175		0.000410675	0.00048183	0.000457431	0.000352883		0.00286782	0.00287695	0.00564633	0.0059475		0.00288398	0.000875602	0.000836397	0.000258087			0.00143007	0.00143007	0.000421257	0.000421257
C15H31O3+	259.227	2	6.51537e-05	0.000130307	5.4456e-05	0.000108912		0.0023095	0.000746669	0.00245768	0.000739671		0.00100626	0.000283034	0.00233251	0.00144936		0.00115945	0.00119333	0.00233003	0.00258757		0.00145882	0.000943726	0.000419245	0.000284269			0.00104729	0.00104729	0.000312897	0.000312897
C19H31+	259.242	2	0	0	0	0		0.008956	0.00163395	0.00966792	0.00238952		0.00135232	0.000608711	0.00272087	0.00148988		0.0005804	0.000585608	0.00115072	0.0012319		0.0025	0.000846898	0.000732425	0.000250146			0.00179525	0.00179525	0.000544015	0.000544015
C16H35O2+	259.263	2	0	0	0	0		0.00198785	0.000205257	0.00203761	0.000360812		6.41858e-05	4.45964e-05	9.51919e-05	6.01918e-05		0.000180456	0.000180901	0.000354944	0.000372876		0.000766767	0.000208283	0.000226501	7.96657e-05			0.000659768	0.000659768	0.000201682	0.000201682
C13H10NO5+	260.055	2	0.000541792	0.000353191	0.000690342	0.000346375		0.000446521	8.54853e-05	0.000405526	4.75208e-05		0.000178941	7.7548e-05	0.00031246	0.000110142		0.00025216	0.000252214	0.000494387	0.000512657		0.000720588	0.000682907	0.000200786	0.000170833			1.65402e-05	1.65402e-05	4.12712e-06	4.12712e-06
C14H14NO4+	260.092	2	0.000149487	0.000147578	0.000144688	0.000133304		0.000432329	0.000111647	0.000383211	6.85335e-05		0.000133103	7.15069e-05	0.000232267	0.000106872		0.000702823	0.000710915	0.00140116	0.00150853		0.000703973	0.00044219	0.000197487	0.000112941			9.2047e-05	9.2047e-05	2.64157e-05	2.64157e-05
C18H14NO+	260.107	2	0.000159349	0.000111211	0.000171469	9.55245e-05		0.00041876	8.03198e-05	0.00036511	4.26178e-05		0.000123585	8.05117e-05	0.000201691	7.13368e-05		0.00139891	0.00141741	0.00279287	0.00301757		0.00148173	0.000874775	0.000421026	0.000251291			0.000128114	0.000128114	3.60387e-05	3.60387e-05
C15H18NO3+	260.128	2	9.26712e-05	0.000185342	7.77257e-05	0.000155451		0.000773476	0.000173886	0.000701896	0.000104673		0.000212336	9.84906e-05	0.000360094	0.000108193		0.00181536	0.00183075	0.00360983	0.00385995		0.00289762	0.0029678	0.000911932	0.0010208			0.000183816	0.000183816	5.22075e-05	5.22075e-05
C19H18N+	260.143	2	6.70197e-05	0.000134039	5.62145e-05	0.000112429		0.000274159	5.03567e-05	0.000244792	2.58972e-05		7.03497e-05	3.79671e-05	0.000116445	3.84198e-05		0.000807818	0.000834192	0.00163199	0.00182158		0.00178405	0.000788108	0.00051582	0.00020446			0.000100679	0.000100679	2.8372e-05	2.8372e-05
C16H22NO2+	260.164	2	0.000118875	0.000237751	9.97179e-05	0.000199436		0.00120529	0.000143465	0.00111527	6.17969e-05		0.000312759	0.000158735	0.000515706	0.000120625		0.00219246	0.00220468	0.0043468	0.00461317		0.00470628	0.00469239	0.00148895	0.00164295			0.000231862	0.000231862	6.72711e-05	6.72711e-05
C17H26NO+	260.201	2	0.00011885	0.000237701	9.97108e-05	0.000199422		0.00112725	0.00015212	0.00106789	9.99739e-05		0.000242538	0.000117864	0.000401146	0.000116147		0.000743844	0.000787395	0.00151967	0.00175386		0.00261351	0.000537213	0.000793586	0.000279948			0.000227153	0.000227153	6.55096e-05	6.55096e-05
C14H30NO3+	260.222	2	0	0	0	0		0.000145172	6.62087e-05	0.000129645	4.70705e-05		3.47949e-05	2.16131e-05	5.69492e-05	3.28518e-05		0.000380482	0.000381143	0.000738917	0.000753114		0.00146776	0.000980898	0.000411746	0.000230207			8.7954e-05	8.7954e-05	2.59384e-05	2.59384e-05
C18H30N+	260.237	2	0	0	0	0		0.000634997	5.16548e-05	0.000649863	0.000101087		0.000124837	3.07092e-05	0.000266044	0.000140385		0.000129176	7.38666e-05	0.000204522	0.000176714		0.000899658	0.000978838	0.000245216	0.000242679			0.000133237	0.000133237	3.96691e-05	3.96691e-05
C14H13O5+	261.076	2	0	0	0	0		0.000171068	7.16733e-05	0.000140413	5.01994e-05		9.01189e-05	5.48353e-05	0.00015451	7.70184e-05		0.000108481	0.000117754	5.54898e-05	6.7377e-05		0.000526853	0.000655747	0.000142396	0.000163954			0.000264334	0.000264334	7.27153e-05	7.27153e-05
C18H13O2+	261.091	2	0.000971384	0.00059575	0.0010871	0.000367693		0.00133833	0.000163524	0.0012138	5.15088e-05		0.000466668	0.000247419	0.00079575	0.00029482		0.00246396	0.00206051	0.00462092	0.00483679		0.00118411	0.00063449	0.000339663	0.000189651			0.00110335	0.00110335	0.000313274	0.000313274
C15H17O4+	261.112	2	0.00280848	0.00117164	0.00345851	0.000886482		0.00384706	0.000744015	0.00341639	0.00039453		0.000857437	0.000595722	0.00133114	0.000368618		0.00822087	0.00825485	0.0163282	0.0172541		0.00375008	0.00345207	0.00115949	0.00115977			0.00139886	0.00139886	0.000394969	0.000394969
C12H21O6+	261.133	2	0.000548196	0.000700164	0.000472927	0.000598142		0.00109502	0.000282933	0.000973944	0.000174321		0.000262147	2.44309e-05	0.000543871	0.000294395		0.00116542	0.00119235	0.00235139	0.00258635		0.0011676	0.000817162	0.000325693	0.000210979			0.000674746	0.000674746	0.000192807	0.000192807
C16H21O3+	261.149	2	0.000864804	0.00172961	0.00072819	0.00145638		0.0059914	0.000917603	0.00544979	0.000421546		0.00187826	0.00115677	0.00298518	0.00076235		0.00707289	0.00711239	0.0140762	0.0149393		0.00437385	0.00441288	0.00139247	0.00155813			0.00160483	0.00160483	0.000454073	0.000454073
C13H25O5+	261.17	2	0.000349032	0.000698063	0.000293919	0.000587837		0.00195839	0.00038786	0.00176718	0.000213942		0.000299202	0.000128525	0.00050282	0.000115971		0.00182777	0.00183401	0.00362728	0.00382383		0.00159773	0.00141538	0.000499694	0.000495545			0.000933644	0.000933644	0.000265576	0.000265576
C17H25O2+	261.185	2	0.000268315	0.00053663	0.00022596	0.000451921		0.00414917	0.000646571	0.00381137	0.000322542		0.000906598	0.000447236	0.00150986	0.000396513		0.00228499	0.00229135	0.00453035	0.00476501		0.00183229	0.000732431	0.000556099	0.000294369			0.000874307	0.000874307	0.00025247	0.00025247
C14H29O4+	261.206	2	4.75083e-05	9.50166e-05	4.00122e-05	8.00244e-05		0.000640031	7.99491e-05	0.000615151	5.99997e-05		8.07063e-05	4.44384e-05	0.000188903	0.000120293		0.000549995	0.000585033	0.00113011	0.00131205		0.00108557	0.000501579	0.000311958	0.000125857			0.000518414	0.000518414	0.000150558	0.000150558
C18H29O+	261.221	2	0.00026782	0.000535639	0.000225575	0.00045115		0.00794499	0.00147703	0.00731372	0.00084286		0.00113612	0.000550097	0.00189838	0.000667609		0.00382661	0.00288365	0.00684329	0.00661784		0.00432316	0.00107244	0.00127408	0.000333428			0.00280061	0.00280061	0.000823023	0.000823023
C15H33O3+	261.242	2	0.000903562	0.000429144	0.00105009	0.000271208		0.00192151	0.000356132	0.00175318	0.000194914		0.000269092	0.000112052	0.000494071	0.000224355		0.00863853	0.00877655	0.0173573	0.0188547		0.000884677	0.000390638	0.000263439	0.000129079			0.00100528	0.00100528	0.00029649	0.00029649
C19H33+	261.258	2	0	0	0	0		0.00080278	5.13854e-05	0.000791755	8.01868e-05		6.69344e-05	2.63585e-05	0.000118037	4.88351e-05		0.000377596	0.0003776	0.000742263	0.000766781		0.00129644	0.000587377	0.000381106	0.000163082			0.000924815	0.000924815	0.000285466	0.000285466
C17H12NO2+	262.086	2	6.55529e-05	0.000131106	5.53964e-05	0.000110793		0.000120652	6.77914e-05	0.000126907	5.71278e-05		0.00033852	0.000163189	0.000615021	0.000305272		0.00108691	0.00111161	0.000506154	0.000508718		0.00128054	0.000745145	0.000363421	0.000182054			0.00021592	0.00021592	6.34161e-05	6.34161e-05
C14H16NO4+	262.107	2	0.000258927	0.00025709	0.000250032	0.000225019		0.000715306	0.000119106	0.000652745	5.94783e-05		0.000147189	0.000130566	0.000206151	9.70287e-05		0.00122712	0.0012347	0.00245285	0.00260749		0.00287468	0.00193811	0.000842002	0.000584774			0.000314036	0.000314036	8.96278e-05	8.96278e-05
C18H16NO+	262.123	2	9.09989e-05	0.000181998	7.69106e-05	0.000153821		0.0007873	0.000101122	0.000707208	3.65411e-05		0.000265078	0.000160228	0.000452031	0.00017487		0.00271434	0.00273485	0.00543401	0.00579742		0.00406791	0.00221223	0.00115929	0.000617341			0.00025423	0.00025423	7.20407e-05	7.20407e-05
C15H20NO3+	262.144	2	0.000160241	0.000320481	0.000135443	0.000270887		0.00110345	0.000193057	0.000995649	9.67843e-05		0.00032158	0.000194539	0.000512137	0.000108377		0.003269	0.00326939	0.00645662	0.0066867		0.00662032	0.00631225	0.00208136	0.0021613			0.000176726	0.000176726	5.06376e-05	5.06376e-05
C12H24NO5+	262.165	2	9.45163e-05	0.000189033	7.98964e-05	0.000159793		0.000544215	7.47228e-05	0.000488685	2.8983e-05		0.000140236	6.59209e-05	0.00024754	9.21348e-05		0.00105238	0.00115718	0.00219536	0.00264572		0.00248578	0.000969345	0.000762354	0.000385584			0.000321977	0.000321977	8.98331e-05	8.98331e-05
C16H24NO2+	262.18	2	6.58699e-05	0.00013174	5.56843e-05	0.000111369		0.0010932	0.000137712	0.00101663	6.09215e-05		0.000232587	8.33033e-05	0.000417941	0.000148931		0.00170839	0.00172875	0.00343446	0.00370079		0.00395087	0.00219863	0.00125455	0.00082458			0.000243473	0.000243473	7.14615e-05	7.14615e-05
C17H28NO+	262.217	2	0	0	0	0		0.000902977	0.000147237	0.000845041	8.51246e-05		0.000156622	5.85743e-05	0.000272757	7.14946e-05		0.000845512	0.000847755	0.00168263	0.00176891		0.00229041	0.000197747	0.000688972	0.000128328			0.000272773	0.000272773	7.81826e-05	7.81826e-05
C18H32N+	262.253	2	0	0	0	0		0.000117261	3.63799e-05	0.000109316	2.5295e-05		3.66712e-05	1.33437e-05	6.62635e-05	2.47588e-05		0.000613935	0.00061402	0.00120814	0.00124196		0.000689826	0.000240565	0.00019953	5.16569e-05			0.000109063	0.000109063	3.26091e-05	3.26091e-05
C13H11O6+	263.055	2	0.00014666	6.3471e-05	0.000176503	4.24519e-05		0.000235822	7.82535e-05	0.000208127	5.21759e-05		7.60435e-05	3.58161e-05	0.000135683	5.13746e-05		0.00013708	0.000137739	0.000274547	0.000290719		0.000159369	0.000120778	4.65381e-05	3.03645e-05			0.000152144	0.000152144	4.18832e-05	4.18832e-05
C10H15O8+	263.076	2	0.000520298	0.000348846	0.000635921	0.000367387		0.000418167	9.64217e-05	0.000375086	5.70245e-05		0.00012619	5.44055e-05	0.000237379	0.000140573		0.00040903	0.000435889	0.000847089	0.000985638		0.000147715	0.000182511	3.8337e-05	4.72052e-05			0.000326642	0.000326642	9.14806e-05	9.14806e-05
C14H15O5+	263.091	2	0.00117892	0.00044377	0.00150253	0.000383448		0.00122462	0.000249029	0.00109202	0.000137139		0.000409813	0.000253895	0.000656407	0.00015106		0.00150611	0.00151015	0.00300747	0.0031621		0.00119684	0.000772539	0.000351353	0.00023252			0.000563878	0.000563878	0.000158644	0.000158644
C11H19O7+	263.113	2	0.000815168	0.000537651	0.000950562	0.000378238		0.000566673	0.00016961	0.00051062	0.00011127		0.000234866	7.82964e-05	0.000466067	0.000276205		0.000850515	0.000851408	0.00167297	0.00170941		0.000393987	0.000485021	0.000102565	0.000125083			0.000448765	0.000448765	0.000128458	0.000128458
C15H19O4+	263.128	2	0.000847302	0.00115841	0.00073826	0.000982829		0.00428351	0.000664776	0.00390196	0.00030309		0.00152078	0.00104089	0.00240558	0.000708509		0.00645678	0.00656927	0.0130805	0.014247		0.00373378	0.00292965	0.00116196	0.00103687			0.001488	0.001488	0.000424975	0.000424975
C12H23O6+	263.149	2	0.000382231	0.000391854	0.000355293	0.000334292		0.000902694	0.000161869	0.000812122	8.22199e-05		0.000160393	7.77604e-05	0.000280753	0.000118207		0.00115481	0.00115524	0.00229308	0.00238169		0.00102373	0.000782821	0.000322509	0.00029548			0.000367669	0.000367669	0.000103415	0.000103415
C16H23O3+	263.164	2	0.000119694	0.000239388	0.000101567	0.000203133		0.00112748	0.000176223	0.00104926	9.26125e-05		0.000422193	0.000232414	0.000701198	0.000191619		0.00101127	0.00103429	0.00205588	0.00226003		0.000334937	0.000208652	0.000101527	7.33364e-05			0.00036311	0.00036311	0.000106147	0.000106147
C20H23+	263.179	2	0.000491815	0.000603639	0.0004339	0.000515105		0.00176938	0.000299051	0.00160006	0.000145525		0.000273777	0.000141963	0.000447694	9.52745e-05		0.00163335	0.00164354	0.0032785	0.00348577		0.00126584	0.00102012	0.000394229	0.000357009			0.000570102	0.000570102	0.000160373	0.000160373
C17H27O2+	263.201	2	7.74493e-05	0.000154899	6.57289e-05	0.000131458		0.00113903	0.000183154	0.00106274	0.000100077		0.000173735	6.15855e-05	0.00031086	9.77794e-05		0.000590741	0.0005955	0.00118812	0.00126915		0.000717973	0.000271695	0.000212696	7.04712e-05			0.000347025	0.000347025	0.000102624	0.000102624
C18H31O+	263.237	2	0.000140585	0.00028117	0.000119327	0.000238654		0.00317918	0.000663248	0.00292288	0.000391376		0.000716766	0.00026944	0.00125944	0.000366098		0.00315572	0.00317263	0.00632911	0.00671285		0.00234458	0.001185	0.000687315	0.000344211			0.00102013	0.00102013	0.000304975	0.000304975
C19H35+	263.273	2	0	0	0	0		0.000486625	7.91194e-05	0.000467771	5.50807e-05		1.06784e-05	1.12937e-05	2.9395e-05	3.60306e-05		0.000215501	0.00021574	0.000429198	0.000448069		0.000898682	0.000343827	0.000265923	8.27353e-05			0.000397516	0.000397516	0.000123305	0.000123305
C10H18NO7+	264.108	2	0.000340883	0.000681767	0.000290299	0.000580598		0.00137365	0.000249971	0.00126034	0.000133825		0.00028538	0.000197973	0.000455555	0.000125962		0.00507099	0.00507133	0.0100863	0.0104364		0.0102254	0.0106863	0.00330794	0.00372392			0.000358962	0.000358962	0.000105377	0.000105377
C14H18NO4+	264.123	2	0.000210441	0.000420881	0.000179223	0.000358446		0.00125345	0.000122024	0.00115562	2.16798e-05		0.000337323	0.000220068	0.00054454	0.000156244		0.00297039	0.00297707	0.00595011	0.00624528		0.0096033	0.00842902	0.00310358	0.00319003			0.000290983	0.000290983	8.36198e-05	8.36198e-05
C11H22NO6+	264.144	2	0.000128678	0.000257356	0.000109598	0.000219197		0.000519929	0.00013855	0.000473075	8.84472e-05		0.000109934	5.56613e-05	0.000184221	4.99618e-05		0.00147063	0.00150802	0.0030055	0.00331819		0.00169814	0.00129389	0.000469151	0.000326454			0.000152095	0.000152095	4.47911e-05	4.47911e-05
C15H22NO3+	264.159	2	3.38177e-05	6.76354e-05	2.8805e-05	5.76101e-05		0.000486748	7.22196e-05	0.000446327	3.17334e-05		0.000117799	6.146e-05	0.00019534	4.32313e-05		0.00113313	0.00114045	0.00221831	0.00224077		0.00319721	0.00363233	0.0010514	0.00127847			9.27608e-05	9.27608e-05	2.61482e-05	2.61482e-05
C12H26NO5+	264.181	2	0.000116216	0.00022291	9.9208e-05	0.000189793		0.000339261	4.81939e-05	0.00031398	2.1376e-05		8.42596e-05	2.88083e-05	0.000153104	5.40137e-05		0.000651868	0.000672881	0.00133718	0.00149162		0.00101045	0.00061193	0.000326089	0.000249395			8.16113e-05	8.16113e-05	2.27006e-05	2.27006e-05
C16H26NO2+	264.196	2	0	0	0	0		0.000411395	3.13063e-05	0.000390799	1.21779e-05		8.57069e-05	4.90364e-05	0.000137906	2.92932e-05		0.00045058	0.000451861	0.000903772	0.000950796		0.00101571	0.00047522	0.000320883	0.000187044			6.38459e-05	6.38459e-05	1.9597e-05	1.9597e-05
C17H30NO+	264.232	2	6.86897e-05	0.000137379	5.85243e-05	0.000117049		0.000434524	9.29169e-05	0.000403973	5.70205e-05		0.000111095	3.255e-05	0.000203098	6.68133e-05		0.00057757	0.000585194	0.00117143	0.00126562		0.00159797	0.000707165	0.00045982	0.000160703			0.000122294	0.000122294	3.66061e-05	3.66061e-05
C18H34N+	264.269	2	4.15019e-05	8.30039e-05	3.5365e-05	7.07299e-05		0.000345279	7.87608e-05	0.000320529	4.93745e-05		4.68216e-05	1.58856e-05	8.72192e-05	3.48291e-05		0.00228044	0.00234338	0.00466825	0.00517148		0.00149892	0.000653383	0.000449586	0.000196761			0.000218794	0.000218794	6.41508e-05	6.41508e-05
C12H9O7+	265.034	2	5.40032e-05	6.96506e-05	4.72727e-05	6.02477e-05		0.000196528	1.704e-05	0.000185773	4.62723e-06		7.09346e-05	1.81778e-05	0.000136198	5.43973e-05		0.000135179	0.000135213	0.00027019	0.000280303		4.27417e-05	4.32055e-05	1.30699e-05	1.2116e-05			0.000155923	0.000155923	4.36799e-05	4.36799e-05
C13H13O6+	265.071	2	0.000217788	0.000180237	0.00026252	0.000146256		0.000527312	0.000126827	0.000465929	7.66473e-05		0.000171238	9.33087e-05	0.000293881	0.00010831		0.000406799	0.000298985	0.000742715	0.000758761		3.64702e-05	4.23327e-05	1.06585e-05	1.13886e-05			0.000308927	0.000308927	8.59853e-05	8.59853e-05
C17H13O3+	265.086	2	0.000616688	0.000285417	0.000784279	0.00026523		0.000491506	0.000102645	0.000450691	5.94506e-05		0.000131481	5.88629e-05	0.000245873	0.000112282		0.000514116	0.000515724	0.00101454	0.00103032		0.000831399	0.00108667	0.000231876	0.000281356			0.000555393	0.000555393	0.000158761	0.000158761
C14H17O5+	265.107	2	0.00204487	0.00106734	0.00248976	0.000837952		0.00224536	0.000543746	0.00202017	0.000330176		0.000820786	0.000522217	0.00135933	0.000476278		0.00274947	0.00278871	0.0055996	0.00606275		0.00167762	0.00114105	0.000471759	0.00029058			0.000926473	0.000926473	0.000268004	0.000268004
C18H17O2+	265.122	2	0.00257253	0.00120555	0.00323417	0.000958173		0.00230998	0.000408717	0.00206913	0.00020781		0.000485026	0.000296709	0.000776054	0.000183511		0.00486902	0.00489146	0.00982618	0.0103988		0.00249992	0.0025853	0.000813333	0.000907088			0.000523473	0.000523473	0.000147456	0.000147456
C15H21O4+	265.143	2	0.000281317	0.000443718	0.000243366	0.000379275		0.00137528	0.000274074	0.0012624	0.000154831		0.000533723	0.000265545	0.000928212	0.000319242		0.00160343	0.00164667	0.00329214	0.00364348		0.001076	0.00061303	0.000329572	0.000222392			0.000551656	0.000551656	0.000157605	0.000157605
C19H21O+	265.159	2	0.000345957	0.000472717	0.000308795	0.000400294		0.00148218	0.000237644	0.00135322	0.0001112		0.000243765	0.000184093	0.000358342	6.82584e-05		0.00180034	0.00180049	0.00359587	0.00372199		0.00100268	0.00110138	0.000333532	0.000401029			0.000472445	0.000472445	0.000135223	0.000135223
C16H25O3+	265.18	2	0.000196039	0.000392078	0.000167628	0.000335257		0.00106604	0.000167281	0.000999341	8.85948e-05		0.000309421	0.000119237	0.000560259	0.000192928		0.000680073	0.000723919	0.00141912	0.00164901		0.000752864	0.000257335	0.000228802	8.32889e-05			0.00044189	0.00044189	0.000128476	0.000128476
C20H25+	265.195	2	0.000183998	0.000367995	0.000157341	0.000314683		0.00193464	0.000290693	0.00181017	0.000146247		0.000385349	0.000184344	0.00064374	0.000180912		0.000801406	0.000807631	0.00162361	0.00173311		0.000623897	0.000517461	0.000196591	0.000177683			0.000468848	0.000468848	0.0001354	0.0001354
C17H29O2+	265.216	2	8.02205e-05	0.000160441	6.86042e-05	0.000137208		0.00100531	0.00011441	0.000948822	4.79557e-05		8.95959e-05	3.42748e-05	0.000155759	4.28498e-05		0.000416434	0.000427598	0.00085518	0.000946206		0.000771182	0.000423916	0.000230239	0.000108224			0.000342978	0.000342978	0.000101263	0.000101263
C18H33O+	265.253	2	0.000157767	0.000315534	0.00013494	0.00026988		0.00306168	0.000574327	0.00283445	0.000320745		0.000531232	0.000285261	0.000860524	0.000132055		0.0039475	0.00396912	0.00797909	0.00846572		0.00419531	0.00228086	0.00124513	0.000631464			0.000659406	0.000659406	0.000197245	0.000197245
C19H37+	265.289	2	0	0	0	0		0.000980764	0.000142255	0.000948552	9.73997e-05		2.53517e-05	1.35952e-05	4.92616e-05	3.37357e-05		0.000301612	0.000303107	0.00060934	0.000645522		0.000871264	0.000405759	0.00025999	0.000101647			0.00102022	0.00102022	0.000318131	0.000318131
C10H20NO7+	266.123	2	0.000143952	0.000162511	0.000143226	0.000132191		0.000439154	0.000120678	0.000404939	7.90744e-05		0.000177472	0.000123082	0.000297444	0.000126793		0.00146691	0.00150139	0.00301716	0.0033208		0.00107079	0.0011671	0.000287815	0.000306467			9.27576e-05	9.27576e-05	2.73204e-05	2.73204e-05
C14H20NO4+	266.139	2	0.000169409	0.000338819	0.000145384	0.000290768		0.000756446	0.000108994	0.000698205	4.62409e-05		0.000210307	0.000127788	0.000351709	0.000118276		0.00165964	0.00166765	0.00336317	0.00356152		0.00539835	0.00453309	0.00174245	0.00167545			0.000151348	0.000151348	4.45914e-05	4.45914e-05
C11H24NO6+	266.16	2	3.21885e-05	6.4377e-05	2.76258e-05	5.52515e-05		0.000225858	3.99651e-05	0.000209146	2.12336e-05		6.55826e-05	4.13771e-05	0.000109941	3.33133e-05		0.000676737	0.0006836	0.00137913	0.00148037		0.00106311	0.00051146	0.000324015	0.000164038			4.86455e-05	4.86455e-05	1.38814e-05	1.38814e-05
C15H24NO3+	266.175	2	2.27087e-05	4.54173e-05	1.94908e-05	3.89816e-05		0.000112619	1.65313e-05	0.000101774	7.26481e-06		2.53718e-05	1.19631e-05	4.43291e-05	1.5008e-05		0.000254401	0.000254924	0.00050507	0.000514284		0.000851874	0.000483224	0.000260579	0.000161287			3.20736e-05	3.20736e-05	9.41158e-06	9.41158e-06
C19H24N+	266.19	2	5.86802e-05	0.00011736	5.0368e-05	0.000100736		0.000380225	6.79506e-05	0.000362748	4.26758e-05		5.30916e-05	2.44223e-05	9.09348e-05	2.53925e-05		0.000343855	0.000347521	0.000701145	0.000753488		0.00118873	0.000770775	0.000385897	0.000308252			4.57095e-05	4.57095e-05	1.33677e-05	1.33677e-05
C16H28NO2+	266.211	2	0	0	0	0		0.000593212	1.8765e-05	0.000578951	3.29331e-05		9.35563e-07	2.09198e-06	2.79585e-06	6.25172e-06		0.000470071	0.000481425	0.000967528	0.00106602		0.00411088	0.0014111	0.00132246	0.000605621			0.000113516	0.000113516	3.55814e-05	3.55814e-05
C17H32NO+	266.248	2	4.24333e-05	8.48667e-05	3.64305e-05	7.28609e-05		0.000393798	0.00010339	0.000370388	6.93635e-05		0.000108263	4.43409e-05	0.000193923	6.44627e-05		0.000799861	0.000814543	0.00164071	0.00179004		0.00165921	0.000483201	0.000503185	0.000153871			0.000222532	0.000222532	6.53782e-05	6.53782e-05
C18H36N+	266.284	2	1.63502e-05	3.27003e-05	1.40391e-05	2.80782e-05		0.000275608	3.81112e-05	0.000269608	2.83199e-05		7.4955e-05	1.53496e-05	0.000147335	6.1994e-05		0.000514954	0.00051859	0.00104681	0.00111541		0.0027106	0.000787486	0.000815874	0.000168881			0.000255486	0.000255486	8.06512e-05	8.06512e-05
C13H15O6+	267.086	2	0.00114701	0.000591784	0.00144465	0.000488371		0.00163472	0.000372638	0.0014736	0.000221177		0.000511051	0.000279466	0.000879513	0.000297566		0.00195894	0.00196576	0.00397642	0.00419285		0.00137756	0.00103499	0.000402965	0.00028077			0.000793336	0.000793336	0.000228319	0.000228319
C14H19O5+	267.123	2	0.00128248	0.0011175	0.00129326	0.000949275		0.00242679	0.000474827	0.00223673	0.000264938		0.000870081	0.000536267	0.00149739	0.000640552		0.00318179	0.00320514	0.00649033	0.00692055		0.00131367	0.00102098	0.000375739	0.000266435			0.000875626	0.000875626	0.000255673	0.000255673
C18H19O2+	267.138	2	0.00194009	0.000887653	0.00260137	0.00106782		0.00122568	0.000213021	0.00108954	0.000114205		0.000209645	0.000194867	0.000280033	7.59088e-05		0.00291068	0.00293316	0.00594	0.00633988		0.00214524	0.00260069	0.00072234	0.00091383			0.00016629	0.00016629	4.58314e-05	4.58314e-05
C19H23O+	267.174	2	0.000548161	0.000891745	0.000477124	0.000767752		0.00289332	0.000493816	0.00265372	0.000245691		0.000566582	0.00033565	0.000923667	0.000220481		0.00336727	0.00339873	0.00688348	0.0073754		0.00207748	0.00168277	0.000669594	0.000616142			0.000794098	0.000794098	0.000229339	0.000229339
C16H27O3+	267.195	2	0.000111494	0.000222988	9.60636e-05	0.000192127		0.000760671	0.000177328	0.000734278	0.000124286		0.000114747	4.40959e-05	0.000245113	0.000122022		0.00019558	0.000198578	0.00040178	0.000435901		0.000549347	0.000231137	0.000169255	6.58742e-05			0.000417525	0.000417525	0.0001239	0.0001239
C20H27+	267.211	2	0.00027462	0.00054924	0.000236627	0.000473253		0.00558171	0.000801784	0.00529264	0.000413328		0.000892342	0.000423764	0.0015117	0.000476757		0.00147258	0.00149195	0.00302039	0.00326292		0.00147429	0.000915024	0.00047083	0.000316917			0.000909507	0.000909507	0.000272109	0.000272109
C17H31O2+	267.232	2	0.000142292	0.000284583	0.000122615	0.000245231		0.00190555	0.000267732	0.00179077	0.000122874		0.000124562	5.58881e-05	0.000208624	6.04782e-05		0.000587075	0.000587523	0.00118568	0.00123523		0.000985425	0.000130734	0.000308549	7.08605e-05			0.000537859	0.000537859	0.000160876	0.000160876
C18H35O+	267.268	2	3.65939e-05	7.31879e-05	3.1538e-05	6.3076e-05		0.00151385	0.000316082	0.00140934	0.000187922		0.000258936	9.30809e-05	0.00047225	0.000156811		0.00224086	0.00225897	0.00457695	0.00488937		0.00202796	0.000598114	0.000606795	0.000109496			0.00131266	0.00131266	0.000393156	0.000393156
C19H39+	267.305	2	3.20323e-06	6.40645e-06	2.76104e-06	5.52207e-06		0.00174135	0.00034553	0.00167395	0.000229387		0.000209043	8.37658e-05	0.000383029	0.000158065		0.000653021	0.000654101	0.00132231	0.00138428		0.0014061	0.000531045	0.000422863	0.000121597			0.00275697	0.00275697	0.000858284	0.000858284
C16H14NO3+	268.097	2	0.00105158	0.000442035	0.00146771	0.000678405		0.00101175	0.000388875	0.000917044	0.000274249		0.000383705	0.000201405	0.000673477	0.000269042		0.00152861	0.00152862	0.00308084	0.00317696		0.00120826	0.00199106	0.000325361	0.000534435			0.000552663	0.000552663	0.000162787	0.000162787
C17H18NO2+	268.133	2	0.000251715	0.000329707	0.000236719	0.000279325		0.00060644	9.31953e-05	0.000567379	4.45699e-05		0.000247866	0.000133235	0.000422795	0.000129491		0.00200338	0.00200804	0.00407476	0.00427812		0.00227274	0.00128688	0.000702686	0.000447701			0.000171947	0.000171947	4.89334e-05	4.89334e-05
C15H26NO3+	268.191	2	6.73766e-06	1.34753e-05	5.82688e-06	1.16538e-05		7.72121e-05	5.87566e-06	8.17151e-05	1.34002e-05		3.3862e-05	1.85746e-05	6.09417e-05	2.83878e-05		0.000280803	0.00028671	0.000581204	0.000637072		0.00150952	0.000945423	0.000493362	0.000379669			9.90154e-05	9.90154e-05	2.98951e-05	2.98951e-05
C19H26N+	268.206	2	6.41868e-05	0.000128374	5.55133e-05	0.000111027		0.00138418	0.000214511	0.00132369	0.000122433		0.000209545	8.46577e-05	0.000382025	0.000140736		0.000507942	0.000509507	0.00103476	0.00108955		0.00110315	0.000259984	0.000355758	0.000125702			0.000134779	0.000134779	4.02567e-05	4.02567e-05
C16H30NO2+	268.227	2	3.25377e-06	6.50755e-06	2.81432e-06	5.62864e-06		0.00106592	0.000123429	0.00102858	6.67728e-05		0.000114442	4.85837e-05	0.000196117	6.06796e-05		0.000633943	0.000664082	0.00132952	0.00151404		0.0018149	0.00069025	0.000584227	0.000290179			0.000129587	0.000129587	3.92826e-05	3.92826e-05
C17H34NO+	268.263	2	0	0	0	0		0.00040891	7.22054e-05	0.000387515	4.16148e-05		0.000118835	5.11423e-05	0.000210478	5.84939e-05		0.000754627	0.00076842	0.00155961	0.00170132		0.00367557	0.000845087	0.00113009	0.000186618			0.000289387	0.000289387	8.84636e-05	8.84636e-05
C18H38N+	268.3	2	9.78352e-06	1.9567e-05	8.46447e-06	1.69289e-05		0.000220449	4.15748e-05	0.000215166	2.92309e-05		4.62581e-05	1.96198e-05	8.80356e-05	4.55704e-05		0.000190992	0.000192148	0.000390768	0.000415265		0.00331519	0.000957365	0.00101226	0.000227367			0.000446305	0.000446305	0.000137973	0.000137973
C12H13O7+	269.066	2	0.000323729	0.000238166	0.000360942	0.000181994		0.000721945	0.000172325	0.000667098	0.000106828		0.000177669	7.73039e-05	0.000313006	8.90462e-05		0.000334121	0.000338693	0.000690368	0.000746602		0.000201268	0.000267822	5.97399e-05	7.29886e-05			0.000388707	0.000388707	0.000112396	0.000112396
C20H13O+	269.096	2	0.000767474	0.000363648	0.00096924	0.000251691		0.00108726	0.000241077	0.000998653	0.000143181		0.000337837	0.000147331	0.000629029	0.000276388		0.00127053	0.00127228	0.0025884	0.00270615		0.00042709	0.000584461	0.000115969	0.000158196			0.000447355	0.000447355	0.000128621	0.000128621
C17H17O3+	269.117	2	0.00239308	0.000946698	0.00316492	0.000996279		0.00226847	0.000449274	0.00205401	0.000249848		0.000396881	0.00029568	0.000604743	0.00011737		0.00481663	0.00485548	0.00990611	0.010582		0.0029008	0.00189642	0.000923366	0.000695119			0.000665996	0.000665996	0.000191362	0.000191362
C14H21O5+	269.138	2	0.0008229	0.000770936	0.000812793	0.000660532		0.00117138	0.000288892	0.0011036	0.000188124		0.000551206	0.000207179	0.00103624	0.000442083		0.00144299	0.00144404	0.00293484	0.00305673		0.000243934	0.00022048	7.31166e-05	6.14844e-05			0.000528953	0.000528953	0.000155504	0.000155504
C18H21O2+	269.154	2	0.000803877	0.000785996	0.000778759	0.000690738		0.00298783	0.000484829	0.00272574	0.000233699		0.000444142	0.000443651	0.000588286	0.000191159		0.00403797	0.00408949	0.00834009	0.00900258		0.0035915	0.00260849	0.00115673	0.00096276			0.000636709	0.000636709	0.000184849	0.000184849
C15H25O4+	269.175	2	0.000525822	0.000809853	0.000462382	0.00070315		0.00105119	0.000283548	0.00101231	0.000199656		0.000477122	9.93061e-05	0.000978578	0.000435012		0.000924539	0.00073126	0.00174498	0.0017484		0.000720296	0.000869687	0.000199344	0.000233893			0.000533724	0.000533724	0.000157262	0.000157262
C19H25O+	269.19	2	0.00180215	0.00353766	0.00156585	0.0030702		0.0135407	0.00204626	0.01258	0.000915781		0.00209486	0.00126421	0.0033269	0.000756506		0.0109561	0.0110407	0.0225312	0.0240481		0.00694926	0.00760277	0.00237084	0.00281749			0.00340681	0.00340681	0.00100083	0.00100083
C16H29O3+	269.211	2	0.000354253	0.000708507	0.000307536	0.000615072		0.0020481	0.000525514	0.0020104	0.000388247		0.000389016	0.000106874	0.000840841	0.000419393		0.000554265	0.000569238	0.00115556	0.00127897		0.00150223	0.000671255	0.000464838	0.000172367			0.000747101	0.000747101	0.000222914	0.000222914
C20H29+	269.226	2	0.000409673	0.000819346	0.000355668	0.000711336		0.0102409	0.00133	0.00991206	0.000758874		0.00155806	0.000710526	0.00268869	0.000981717		0.00166752	0.00168218	0.00343332	0.00367396		0.00253269	0.00111354	0.000816706	0.000392383			0.00121022	0.00121022	0.00036571	0.00036571
C17H33O2+	269.248	2	0.000101169	0.000202338	8.78391e-05	0.000175678		0.00278287	0.000456816	0.00263373	0.000244074		0.000193866	8.82445e-05	0.000336016	0.000104578		0.00121181	0.00122734	0.00250389	0.00270309		0.00142801	0.000138057	0.000447837	5.48929e-05			0.000588068	0.000588068	0.000176422	0.000176422
C18H37O+	269.284	2	2.11994e-06	4.23989e-06	1.84088e-06	3.68175e-06		0.00216259	0.000554071	0.00200334	0.000354765		0.000395718	0.000182429	0.000717532	0.000346649		0.00202731	0.00145344	0.00368202	0.00352517		0.00183093	0.00066837	0.000551831	0.000137205			0.000689581	0.000689581	0.000208076	0.000208076
C16H16NO3+	270.112	2	0.000235668	0.000183696	0.000264146	0.000152341		0.000803289	0.00019338	0.000750731	0.000122243		0.000269974	0.000135436	0.000470719	0.000145215		0.00192817	0.00194533	0.00398349	0.00426378		0.00207703	0.00188903	0.000608264	0.000507333			0.000257794	0.000257794	7.73049e-05	7.73049e-05
C13H20NO5+	270.134	2	5.48868e-05	7.58937e-05	5.67203e-05	7.14245e-05		0.000236813	3.7483e-05	0.000217653	1.76102e-05		7.27755e-05	4.33024e-05	0.000130222	6.09126e-05		0.000793246	0.000803022	0.0016438	0.00177279		0.00156187	0.00129019	0.000506636	0.000451971			5.61681e-05	5.61681e-05	1.61075e-05	1.61075e-05
C17H20NO2+	270.149	2	5.13027e-05	9.89728e-05	4.47746e-05	8.6185e-05		0.000121745	3.31381e-05	0.000116902	2.30911e-05		4.74239e-05	2.4019e-05	8.21501e-05	2.52375e-05		0.000314111	0.000317937	0.000650878	0.000701737		0.000532349	0.000362487	0.00017217	0.000136792			3.12035e-05	3.12035e-05	9.02664e-06	9.02664e-06
C14H24NO4+	270.17	2	6.82042e-06	1.36408e-05	5.94214e-06	1.18843e-05		2.52424e-05	2.62871e-06	2.37105e-05	1.83503e-06		9.09868e-06	4.83861e-06	1.57703e-05	5.12549e-06		6.08409e-05	6.11336e-05	0.000125162	0.000132537		0.000229538	0.000152367	7.52607e-05	6.18126e-05			8.07917e-06	8.07917e-06	2.45453e-06	2.45453e-06
C18H24NO+	270.185	2	6.44123e-05	0.000128825	5.6121e-05	0.000112242		0.000228519	5.36503e-05	0.000220982	3.68174e-05		4.59649e-05	2.31932e-05	8.2254e-05	2.90918e-05		0.000243866	0.000247079	0.000505788	0.000546429		0.000355581	0.000307839	0.00011633	0.000108867			3.39341e-05	3.39341e-05	1.02052e-05	1.02052e-05
C15H28NO3+	270.206	2	3.28403e-05	6.56807e-05	2.86153e-05	5.72306e-05		8.30222e-05	1.98477e-05	7.76917e-05	1.25367e-05		1.9973e-05	5.36866e-06	4.17963e-05	2.05073e-05		5.31841e-05	5.3185e-05	0.000108155	0.000111752		0.00022934	0.000177913	8.00106e-05	7.37323e-05			4.64736e-05	4.64736e-05	1.34953e-05	1.34953e-05
C19H28N+	270.222	2	1.44694e-05	2.89388e-05	1.26086e-05	2.52171e-05		0.00214116	0.000324669	0.00208588	0.000204593		0.000211274	7.60143e-05	0.000397729	0.000148843		0.000659052	0.000663005	0.00135802	0.00144294		0.00164995	0.000331019	0.000526129	0.000129265			0.00016655	0.00016655	5.10714e-05	5.10714e-05
C17H36NO+	270.279	2	0	0	0	0		0.000333411	0.000119203	0.000315199	8.57361e-05		8.11492e-05	3.61237e-05	0.000142615	4.11556e-05		0.000678795	0.000690063	0.00141187	0.00153545		0.00204781	0.000936585	0.000624072	0.000232945			0.000157732	0.000157732	4.74109e-05	4.74109e-05
C15H11O5+	271.06	2	0.000274116	0.000105851	0.000394455	0.000189805		0.000322733	4.8569e-05	0.000306641	2.36978e-05		9.3443e-05	3.57267e-05	0.000173786	5.90798e-05		0.000149191	0.000145369	0.000303136	0.000314212		0.0002672	0.000113017	8.23209e-05	2.63477e-05			9.04698e-05	9.04698e-05	2.55719e-05	2.55719e-05
C12H15O7+	271.081	2	0.000369344	0.000272447	0.000413681	0.000238278		0.000741431	0.000177503	0.000678691	0.000109386		0.000184042	0.000113038	0.000318618	0.000120955		0.000722521	0.000733637	0.00150601	0.00163409		0.00010888	9.08362e-05	3.59004e-05	3.32151e-05			0.000225792	0.000225792	6.64178e-05	6.64178e-05
C9H19O9+	271.102	2	0.000417685	0.000188876	0.000572378	0.000212217		0.0009033	0.000179596	0.000839755	0.000101536		7.63311e-05	4.87086e-05	0.000117273	2.98054e-05		0.000881719	0.000883825	0.00181352	0.00190455		0.00120116	0.00108009	0.000355469	0.000292319			0.000341283	0.000341283	9.61246e-05	9.61246e-05
C13H19O6+	271.118	2	0.00025722	0.000322568	0.000230841	0.00028732		0.000714149	0.00014551	0.000681402	8.9724e-05		0.000416284	0.00019314	0.00078984	0.000396143		0.00116474	0.00106797	0.0023479	0.00254667		0.000210587	0.000307632	5.8431e-05	8.56127e-05			0.000379415	0.000379415	0.000114658	0.000114658
C17H19O3+	271.133	2	0.0019507	0.000991241	0.0023713	0.00073376		0.00315021	0.000606994	0.00287409	0.000334786		0.000393348	0.000400025	0.000501575	0.00019665		0.00614173	0.00617337	0.0126855	0.0134465		0.003922	0.00337489	0.00131709	0.00129161			0.000971553	0.000971553	0.000285221	0.000285221
C14H23O5+	271.154	2	0.000771723	0.000945372	0.000695994	0.000852568		0.00126194	0.000291106	0.0012118	0.000192622		0.000710246	0.000218852	0.00138983	0.000593646		0.00158705	0.00160027	0.00328965	0.00351636		0.000934501	0.000503347	0.000283797	0.000142657			0.000558578	0.000558578	0.000162624	0.000162624
C18H23O2+	271.169	2	0.000456315	0.00091263	0.000399031	0.000798062		0.0029759	0.000433795	0.00275516	0.000187817		0.000475911	0.000417892	0.000656591	0.000188645		0.0026061	0.00262471	0.00539575	0.00575055		0.00193711	0.00153465	0.000630015	0.000544085			0.000634436	0.000634436	0.000189161	0.000189161
C15H27O4+	271.19	2	0.00081528	0.00163056	0.000712989	0.00142598		0.00224242	0.000859571	0.00219914	0.000654199		0.000820894	0.000156275	0.00178051	0.000873191		0.00140435	0.000960005	0.00255256	0.00248259		0.0014404	0.00120425	0.000418511	0.000329764			0.000998651	0.000998651	0.000297564	0.000297564
C19H27O+	271.206	2	0.00402773	0.00805546	0.00352258	0.00704515		0.0375658	0.00527294	0.0355697	0.00229473		0.00632136	0.00327206	0.0105843	0.00299746		0.0184238	0.0186017	0.0382439	0.0410064		0.0142695	0.0130298	0.00485974	0.00508096			0.00675558	0.00675558	0.0020338	0.0020338
C16H31O3+	271.227	2	0.00062116	0.00124232	0.000543297	0.00108659		0.003857	0.000779938	0.00377323	0.000535607		0.000180265	4.61131e-05	0.000429757	0.000270002		0.000888935	0.000896815	0.00184403	0.00197362		0.00291238	0.00162653	0.000915224	0.000433408			0.00126951	0.00126951	0.000382537	0.000382537
C20H31+	271.242	2	0.000458574	0.000917148	0.000401114	0.000802228		0.0137069	0.00130832	0.01364	0.00102274		0.00118078	0.000398983	0.00217107	0.00067811		0.00445641	0.00448772	0.00922803	0.00983191		0.00510369	0.00353673	0.00163887	0.00112554			0.00191574	0.00191574	0.00059667	0.00059667
C17H35O2+	271.263	2	0.000102281	0.000204562	8.94719e-05	0.000178944		0.00193081	0.00022276	0.00186567	9.91349e-05		8.40677e-05	5.27706e-05	0.000133655	2.64525e-05		0.000327478	0.000387453	0.000721825	0.000933813		0.00109705	0.000283606	0.000361412	0.00014498			0.000492908	0.000492908	0.000150459	0.000150459
C16H18NO3+	272.128	2	0.000159877	0.000319754	0.000140303	0.000280606		0.00143625	0.000287837	0.00134076	0.000164266		0.000491664	0.000239629	0.000879489	0.000313993		0.00422346	0.00429267	0.00884364	0.00961393		0.00555757	0.00332694	0.00176021	0.00113652			0.000376809	0.000376809	0.000111593	0.000111593
C17H22NO2+	272.164	2	0.000158871	0.000317741	0.000139438	0.000278877		0.000777013	0.000135965	0.000737234	7.3838e-05		0.000222944	8.51467e-05	0.000415087	0.00015109		0.00187628	0.00189755	0.00391429	0.00421261		0.00355001	0.00283571	0.00118849	0.00108773			0.000177034	0.000177034	5.30622e-05	5.30622e-05
C18H26NO+	272.201	2	0.000370373	0.000740747	0.000325115	0.000650229		0.000905155	0.000171161	0.000852957	9.59369e-05		0.000250968	8.68435e-05	0.000472402	0.00016829		0.00112497	0.00116349	0.00238032	0.00266288		0.00168231	0.000963709	0.000550117	0.000360464			0.000348431	0.000348431	0.000104011	0.000104011
C15H30NO3+	272.222	2	0	0	0	0		0.00303736	0.000483625	0.00303403	0.000361949		0.000191339	5.76095e-05	0.000382374	0.000162699		0.000291151	0.000292672	0.000588318	0.000595265		0.00247849	0.00222101	0.000778683	0.000607673			0.00014249	0.00014249	4.3986e-05	4.3986e-05
C16H34NO2+	272.258	2	9.616e-06	1.9232e-05	8.44274e-06	1.68855e-05		9.86496e-05	8.70987e-06	9.95951e-05	1.19069e-05		6.89804e-07	1.10587e-06	8.80161e-07	1.28672e-06		0.000860778	0.000875704	0.00180446	0.00196508		0.00240416	0.00195196	0.000791633	0.00069763			9.34117e-05	9.34117e-05	2.9135e-05	2.9135e-05
C7H13O11+	273.045	2	3.53147e-05	5.31864e-05	3.69847e-05	5.07217e-05		0.000405991	7.00292e-05	0.000390999	4.01215e-05		0.00013925	6.18739e-05	0.000258836	0.00010093		6.63471e-05	7.09356e-05	0.000142803	0.000166806		0.000359303	8.53213e-05	0.000114947	2.56517e-05			0.000115515	0.000115515	3.44386e-05	3.44386e-05
C8H17O10+	273.082	2	0.000243349	0.000268543	0.000245034	0.000239948		0.000632072	0.000111915	0.000600678	6.10818e-05		0.000117622	6.3105e-05	0.00020603	5.45608e-05		0.000318803	0.000335696	0.000682234	0.000782173		0.00082239	0.000745506	0.000247641	0.0001989			0.000259447	0.000259447	7.54548e-05	7.54548e-05
C12H17O7+	273.097	2	0.00131378	0.000555468	0.00170363	0.000439057		0.00105495	0.000222894	0.000982938	0.000130828		0.000379326	0.000199125	0.000705089	0.000390679		0.0023123	0.00228138	0.00477225	0.00501139		0.000766998	0.000500058	0.000240668	0.000155635			0.000764985	0.000764985	0.00022319	0.00022319
C16H17O4+	273.112	2	0.00254412	0.00102397	0.00338115	0.000984906		0.00291817	0.000562291	0.00271564	0.000311453		0.000412036	0.000298781	0.000644832	0.000106383		0.00518941	0.00522131	0.0108098	0.0114905		0.00252092	0.0019315	0.000840048	0.000729877			0.00097833	0.00097833	0.000290965	0.000290965
C17H21O3+	273.149	2	0.000895852	0.000602605	0.00100426	0.000540255		0.00218399	0.000407535	0.00199532	0.000225117		0.000224306	0.000270651	0.000272401	0.00014552		0.00442753	0.0044619	0.00923997	0.00986299		0.00271524	0.00279532	0.000942541	0.00106041			0.000670231	0.000670231	0.000197615	0.000197615
C14H25O5+	273.17	2	0.000396207	0.000792415	0.000349034	0.000698068		0.00118419	0.000416281	0.00115621	0.000310461		0.000683949	0.000113675	0.00142555	0.000648189		0.0012077	0.00120824	0.00249064	0.00258869		0.000507799	0.000346599	0.000165896	0.000125693			0.000433417	0.000433417	0.000128487	0.000128487
C18H25O2+	273.185	2	0.000804963	0.00160993	0.000709162	0.00141832		0.00938605	0.00113004	0.00890186	0.000359527		0.00219871	0.00146392	0.00340553	0.000782969		0.00350792	0.0035442	0.00733953	0.00788185		0.0031284	0.00168603	0.00103944	0.00066487			0.00102737	0.00102737	0.000309047	0.000309047
C15H29O4+	273.206	2	0.000675422	0.00135084	0.000595084	0.00119017		0.00319788	0.00120761	0.00318723	0.00093705		0.000894438	0.000202277	0.00200511	0.0010278		0.00133056	0.00115612	0.002647	0.00277353		0.00077315	0.000704349	0.000237059	0.000210155			0.000948812	0.000948812	0.000288126	0.000288126
C19H29O+	273.221	2	0.00333941	0.00667882	0.00294237	0.00588474		0.0432532	0.00539835	0.0414598	0.00206172		0.00682794	0.00390636	0.0111724	0.00498907		0.0135578	0.013688	0.0283518	0.0303965		0.0151116	0.00849242	0.00502289	0.003248			0.00611255	0.00611255	0.00186193	0.00186193
C16H33O3+	273.242	2	0.000210524	0.000421047	0.000185508	0.000371016		0.00460244	0.00140002	0.00462739	0.00109056		0.000492327	0.000116172	0.00119184	0.000772896		0.00218713	0.00223077	0.00460938	0.00504305		0.00297248	0.00242491	0.000945187	0.000821245			0.00243326	0.00243326	0.000750802	0.000750802
C20H33+	273.258	2	7.39538e-06	1.47908e-05	6.51698e-06	1.3034e-05		0.00910017	0.00126838	0.0090913	0.000917865		0.000629088	0.00018765	0.00118007	0.000368187		0.00284408	0.00286571	0.00593684	0.00633469		0.00358845	0.00131227	0.00117748	0.000440857			0.00278205	0.00278205	0.000870946	0.000870946
C19H16NO+	274.123	2	0.000632136	0.000682782	0.000612367	0.000610682		0.001964	0.000419945	0.00181014	0.000247969		0.000443683	0.000238033	0.000800576	0.000354376		0.00520903	0.00527725	0.0109611	0.0118399		0.00643734	0.00379782	0.00199791	0.00112478			0.000559338	0.000559338	0.000167455	0.000167455
C19H32N+	274.253	2	4.71098e-06	9.42196e-06	4.1666e-06	8.3332e-06		0.00388096	0.00044854	0.00397544	0.000431302		0.000111663	5.7647e-05	0.000274461	0.000175791		0.000155017	0.000122321	0.000297905	0.000301443		0.0029794	0.00400741	0.000907838	0.00113721			0.000191145	0.000191145	5.99385e-05	5.99385e-05
C11H15O8+	275.076	2	0.000251014	0.000292581	0.000272333	0.0002571		0.000697733	0.000165718	0.000646086	0.000103199		0.000344189	0.000211935	0.000600238	0.000235524		0.00042134	0.000423461	0.000860551	0.000870956		0.000213713	0.000162718	6.666e-05	4.74661e-05			0.000528522	0.000528522	0.000158663	0.000158663
C8H19O10+	275.097	2	0.00154112	0.000656048	0.00204456	0.000694324		0.0013332	0.000356386	0.00125971	0.000236331		0.000271233	0.000147014	0.000501928	0.000250731		0.0015757	0.00166655	0.00340302	0.00392334		0.00167574	0.00154129	0.000506389	0.000427735			0.000731651	0.000731651	0.000215457	0.000215457
C16H19O4+	275.128	2	0.00594684	0.0025965	0.00803347	0.00264278		0.00622068	0.00173048	0.00569256	0.00114494		0.00107069	0.000625794	0.00181772	0.000460153		0.0131814	0.013233	0.0275828	0.0291258		0.0046099	0.00312343	0.00152371	0.00114369			0.00205822	0.00205822	0.000610689	0.000610689
C13H23O6+	275.149	2	0.000631555	0.000602863	0.000633684	0.000514747		0.00100976	0.00023159	0.000946127	0.00014272		0.0002469	9.33992e-05	0.000470802	0.000172147		0.000952526	0.000954025	0.00198524	0.00207749		0.00153565	0.000848869	0.000508195	0.000342213			0.000502043	0.000502043	0.000149475	0.000149475
C17H23O3+	275.164	2	0.000683998	0.000947046	0.000618437	0.000844669		0.00326402	0.000455552	0.00309805	0.00018758		0.000814387	0.000523387	0.00136961	0.000411332		0.00459155	0.00462935	0.00965777	0.0103209		0.0022605	0.00239316	0.000798507	0.000916524			0.000926167	0.000926167	0.000276932	0.000276932
C14H27O5+	275.185	2	0.000298394	0.000596788	0.000264813	0.000529627		0.00121109	0.000346713	0.00115008	0.000236646		0.000330514	0.000133694	0.000602856	0.000175923		0.00134102	0.00142275	0.00290064	0.00335699		0.00118978	0.00091628	0.0003978	0.000334344			0.000564686	0.000564686	0.00016641	0.00016641
C18H27O2+	275.201	2	0.000239134	0.000478269	0.000212235	0.000424469		0.00389207	0.000542585	0.00374474	0.000240018		0.000620387	0.000301052	0.00107237	0.000290247		0.00264888	0.00266025	0.00554733	0.00586486		0.00127327	0.000906144	0.000442457	0.000398767			0.000708176	0.000708176	0.00021641	0.00021641
C15H31O4+	275.222	2	0.000210367	0.000420733	0.000186717	0.000373434		0.00121659	0.000210587	0.00120099	0.000135803		0.000203879	9.58175e-05	0.000366181	0.000119352		0.00077288	0.000807352	0.00166129	0.00188477		0.000851593	0.000273135	0.000293539	0.000149392			0.000491462	0.000491462	0.00014948	0.00014948
C19H31O+	275.237	2	0.000511191	0.00102238	0.000453748	0.000907496		0.00629195	0.00103477	0.00612395	0.000588849		0.000809928	0.000321746	0.00154196	0.000634341		0.00218914	0.00174097	0.00426259	0.00451412		0.00320437	0.00163403	0.00101134	0.0004116			0.00157593	0.00157593	0.000481596	0.000481596
C16H35O3+	275.258	2	0.00342215	0.00126423	0.00496378	0.00218489		0.00261816	0.000713281	0.00241753	0.000468884		0.000442214	0.000257416	0.000761605	0.000215869		0.00889477	0.00893476	0.0186366	0.0197158		0.000685889	0.000519804	0.00022454	0.000174923			0.00100017	0.00100017	0.000300215	0.000300215
C20H35+	275.273	2	0	0	0	0		0.000718648	7.42941e-05	0.00071388	4.14682e-05		4.99255e-06	5.39057e-06	8.16084e-06	6.93589e-06		0.000286602	0.000294069	0.00061071	0.000674918		0.00134179	0.00100478	0.000430954	0.000310595			0.000551273	0.000551273	0.000175527	0.000175527
C15H18NO4+	276.123	2	7.88556e-05	0.000157711	7.02207e-05	0.000140441		0.000772096	0.000164073	0.000730193	9.81369e-05		0.000209742	0.000111252	0.00038035	0.000131537		0.00154686	0.00157597	0.00329212	0.00359473		0.00302672	0.00190874	0.000996688	0.000689554			0.000264216	0.000264216	8.18574e-05	8.18574e-05
C12H22NO6+	276.144	2	0.000148722	0.000144315	0.000148206	0.000130469		0.000355283	7.9351e-05	0.000330305	4.82185e-05		7.94814e-05	5.15031e-05	0.000135562	4.72081e-05		0.000787429	0.000795494	0.00166528	0.00178793		0.00164266	0.000846043	0.000537321	0.000319087			0.000117439	0.000117439	3.57056e-05	3.57056e-05
C16H22NO3+	276.159	2	6.15941e-05	0.000123188	5.48567e-05	0.000109713		0.000332029	5.00632e-05	0.000319359	2.38672e-05		0.000112815	4.86629e-05	0.000204131	5.83514e-05		0.00110384	0.0011156	0.00233541	0.00250967		0.00273387	0.00246053	0.000948672	0.000943287			0.000122079	0.000122079	3.72612e-05	3.72612e-05
C20H22N+	276.175	2	9.61467e-05	0.000192293	8.56344e-05	0.000171269		0.000285577	6.75553e-05	0.00027343	4.35046e-05		0.000111926	5.01185e-05	0.000201717	6.07675e-05		0.000848041	0.000860493	0.00172296	0.00172907		0.00258862	0.00140005	0.000870355	0.000592564			0.000146561	0.000146561	4.37988e-05	4.37988e-05
C17H26NO2+	276.196	2	6.78385e-05	0.000135677	6.04259e-05	0.000120852		0.000631465	9.3128e-05	0.000609387	4.4193e-05		0.000129042	6.70391e-05	0.000237508	8.85747e-05		0.0012829	0.0012858	0.00268778	0.00282119		0.00176355	0.00158238	0.00061383	0.000612165			0.00018254	0.00018254	5.80606e-05	5.80606e-05
C14H30NO4+	276.217	2	0	0	0	0		0.000268257	7.80914e-05	0.00024909	5.26955e-05		6.15337e-05	1.76455e-05	0.000122678	5.08683e-05		0.000579738	0.000583507	0.00122189	0.00130006		0.000458496	0.000436284	0.000164635	0.000182934			0.000153308	0.000153308	4.59955e-05	4.59955e-05
C18H30NO+	276.232	2	2.67473e-05	5.34945e-05	2.38278e-05	4.76556e-05		0.000442822	7.25111e-05	0.00043089	4.0212e-05		6.37853e-05	2.20519e-05	0.000124367	4.7904e-05		0.000652334	0.000665091	0.00138954	0.00151923		0.00142565	0.0004478	0.000475049	0.000175839			0.0001036	0.0001036	3.2657e-05	3.2657e-05
C19H34N+	276.269	2	8.55154e-07	1.71031e-06	7.61915e-07	1.52383e-06		6.00999e-05	1.79131e-05	7.30703e-05	2.40295e-05		2.4456e-06	3.62314e-06	7.0539e-06	1.08508e-05		7.21481e-05	7.40945e-05	0.000154374	0.00017085		0.000277128	0.000146179	9.24495e-05	5.75033e-05			5.76827e-05	5.76827e-05	1.90773e-05	1.90773e-05
C13H9O7+	277.034	2	2.7251e-05	4.76037e-05	2.59677e-05	4.22182e-05		0.000237425	9.59799e-05	0.000231999	7.28534e-05		7.03916e-05	1.85406e-05	0.000147137	6.92491e-05		0.000163694	0.000126685	0.000123568	7.91678e-05		0.000275613	0.000282413	8.80658e-05	8.289e-05			0	0	0	0
C14H13O6+	277.071	2	3.69578e-05	7.39156e-05	3.30242e-05	6.60484e-05		1.1582e-05	5.45982e-06	1.64675e-05	7.76283e-06		0.00011263	3.1143e-05	0.000270046	0.000165597		0.000795729	0.000797511	0.000401144	0.000413243		4.94905e-05	4.14453e-05	1.61645e-05	1.44859e-05			9.80745e-05	9.80745e-05	2.84581e-05	2.84581e-05
C18H13O3+	277.086	2	0.000399719	0.000247613	0.000504633	0.000209235		0	0	0	0		8.23764e-05	7.42331e-05	0.000117885	6.50425e-05		0	0	0	0		1.57575e-06	3.1515e-06	4.54317e-07	9.08635e-07			0.000256816	0.000256816	7.82669e-05	7.82669e-05
C15H17O5+	277.107	2	0.000575437	0.000182245	0.000781988	0.000240787		0.000755962	0.000139454	0.000713694	7.60222e-05		0.000170052	0.00011609	0.000287632	9.71596e-05		0.00119932	0.00121415	0.00254977	0.00275008		0.000619603	0.000348417	0.000205585	0.000133047			0.000283379	0.000283379	8.34724e-05	8.34724e-05
C12H21O7+	277.128	2	0.000155481	0.000184967	0.000147019	0.000167823		0.000246499	7.2979e-05	0.000236462	5.08604e-05		7.80968e-05	2.99711e-05	0.000153846	6.9916e-05		0.000405379	0.000408526	0.000831532	0.000838714		0.000205531	0.000149185	6.40409e-05	4.25803e-05			0.000171313	0.000171313	5.13747e-05	5.13747e-05
C16H21O4+	277.143	2	0.000370779	0.000429813	0.000348821	0.000387225		0.00142228	0.000221414	0.00135184	0.000104387		0.000443861	0.000304218	0.000743789	0.000255727		0.00255557	0.00262412	0.00548501	0.00606899		0.00126182	0.00106516	0.000439952	0.000419571			0.000491915	0.000491915	0.000148502	0.000148502
C13H25O6+	277.165	2	0.000263262	0.000254583	0.000265039	0.000232263		0.000343545	9.375e-05	0.000332252	6.4564e-05		9.3109e-05	5.06061e-05	0.000162567	3.83211e-05		0.000586279	0.000586286	0.00122291	0.00126327		0.000492467	0.000319741	0.000169394	0.000135938			0.000162625	0.000162625	4.90928e-05	4.90928e-05
C17H25O3+	277.18	2	0.000124295	0.000237631	0.000111363	0.000212314		0.000897262	0.00015768	0.000854461	8.35613e-05		0.000158545	8.47433e-05	0.000280322	9.33847e-05		0.000930856	0.00094344	0.00198132	0.002142		0.000395558	0.000220202	0.000131178	8.39109e-05			0.000275382	0.000275382	8.32096e-05	8.32096e-05
C14H29O5+	277.201	2	0.000101991	0.000203981	9.11783e-05	0.000182357		0.000471496	0.000108861	0.000449168	6.85473e-05		0.0001131	4.42696e-05	0.000207592	5.74129e-05		0.000634414	0.000646319	0.00135544	0.00147988		0.000317251	0.00020822	0.000107841	8.30326e-05			0.000215892	0.000215892	6.47027e-05	6.47027e-05
C18H29O2+	277.216	2	6.16906e-05	0.000123381	5.51536e-05	0.000110307		0.00128117	0.000211175	0.00124103	0.000112512		0.000185066	8.91299e-05	0.00032624	0.000111838		0.000978189	0.000979414	0.00205252	0.00214443		0.000544349	0.000261701	0.000182136	0.00010058			0.000289223	0.000289223	8.97684e-05	8.97684e-05
C19H33O+	277.253	2	4.20548e-05	8.41096e-05	3.76034e-05	7.52069e-05		0.0009957	0.000150317	0.000976272	8.0916e-05		0.000154839	6.82539e-05	0.000277242	7.95154e-05		0.000808107	0.000821432	0.00172423	0.00187477		0.000710618	0.000213435	0.000237752	7.70831e-05			0.000488272	0.000488272	0.000152295	0.000152295
C20H37+	277.289	2	0	0	0	0		0.000491689	3.29959e-05	0.000508515	4.33369e-05		1.86737e-05	1.06006e-05	4.77297e-05	4.08378e-05		0.00026978	0.00027219	0.000572231	0.000612543		0.000757559	0.000243433	0.000247501	6.09123e-05			0.000386204	0.000386204	0.000126323	0.000126323
C16H8NO4+	278.045	2	0	0	0	0		0.000328486	0.000107274	0.000300726	7.51908e-05		0.000114987	7.70434e-05	0.000195154	9.21989e-05		0.000426301	0.000479113	0.000833328	0.000864606		0.000324298	0.000141827	0.000115444	6.54446e-05			0.000175196	0.000175196	5.48938e-05	5.48938e-05
C17H12NO3+	278.081	2	0.000287733	0.000237347	0.000336291	0.000196116		0.000347946	9.42141e-05	0.000335641	6.43079e-05		0.000192522	0.000107006	0.000338723	0.000104325		0.000235049	0.000240014	0.000124053	0.000138821		0.000237043	0.000230398	7.43478e-05	6.40721e-05			9.62955e-05	9.62955e-05	2.87094e-05	2.87094e-05
C14H16NO5+	278.102	2	4.40776e-05	5.60588e-05	4.10689e-05	5.27764e-05		0.000341325	9.87964e-05	0.00030765	6.78278e-05		9.94052e-05	2.72461e-05	0.00020846	0.000110186		0.000206643	0.000206665	0.000433031	0.000448358		0.00197905	0.0025371	0.000607036	0.000719083			0.000169763	0.000169763	5.24267e-05	5.24267e-05
C18H16NO2+	278.118	2	0.000115772	0.000143568	0.000106749	0.000131668		0.000291209	2.09836e-05	0.000291203	8.24027e-06		9.22911e-05	5.15091e-05	0.000161751	4.7574e-05		0.00104223	0.00107967	0.00225516	0.0025289		0.00105001	0.000954597	0.00032713	0.000272699			0.000120753	0.000120753	3.74105e-05	3.74105e-05
C19H20NO+	278.154	2	0.000100611	0.000136735	0.000115327	0.000120624		0.000278682	5.05053e-05	0.000273469	3.03934e-05		4.94685e-05	2.81183e-05	8.96238e-05	3.31233e-05		0.00086668	0.000875435	0.00184604	0.00198139		0.00245071	0.00135553	0.000806456	0.000481921			0.000106673	0.000106673	3.19115e-05	3.19115e-05
C20H24N+	278.19	2	3.9051e-05	7.8102e-05	3.50361e-05	7.00722e-05		0.000198755	2.3209e-05	0.000192087	7.01354e-06		5.18655e-05	3.12767e-05	9.08303e-05	3.63233e-05		0.000670194	0.000687427	0.00144301	0.00159387		0.00119896	0.00100342	0.000420186	0.000395931			0.000113853	0.000113853	3.41791e-05	3.41791e-05
C18H32NO+	278.248	2	3.66261e-05	7.32522e-05	3.28673e-05	6.57346e-05		0.000603405	0.000144523	0.000591974	9.80574e-05		0.000103484	4.67708e-05	0.000188203	5.24602e-05		0.000909836	0.000910175	0.00189748	0.00194615		0.00159306	0.000449676	0.000523013	0.000124613			0.000166988	0.000166988	5.28437e-05	5.28437e-05
C19H36N+	278.284	2	0	0	0	0		0.000186704	3.49577e-05	0.000198638	3.43218e-05		3.179e-05	1.24297e-05	6.20524e-05	2.44376e-05		0.000619952	0.000666939	0.00136309	0.00160368		0.00146133	0.000399439	0.000478145	9.01809e-05			0.000118611	0.000118611	3.82985e-05	3.82985e-05
C9H11O10+	279.035	2	1.80284e-06	2.3639e-06	1.68954e-06	2.2431e-06		0.000168567	4.62705e-05	0.000163922	3.2069e-05		6.00251e-05	1.49702e-05	0.000129082	6.92408e-05		0	0	0	0		0.000447582	0.00046216	0.000142451	0.000133183			0.000106924	0.000106924	3.1753e-05	3.1753e-05
C14H15O6+	279.086	2	6.08204e-05	0.000121641	5.47438e-05	0.000109488		2.21122e-05	1.04238e-05	3.16688e-05	1.49288e-05		0.000272617	5.37949e-05	0.000657848	0.000424489		0.00386005	0.00386581	0.00196394	0.00202894		0.000117644	0.00010201	3.91878e-05	3.65068e-05			0.000108158	0.000108158	3.21583e-05	3.21583e-05
C18H15O3+	279.102	2	0	0	0	0		0	0	0	0		0	0	0	0		0	0	0	0		0.000743509	0.000764105	0.000279258	0.000305205			0.000183001	0.000183001	5.54106e-05	5.54106e-05
C15H19O5+	279.123	2	0.000712649	0.000833321	0.00067273	0.000767669		0.00182454	0.000189403	0.00180036	5.63551e-05		0.000551187	0.000233354	0.00112695	0.00065885		0.00357164	0.00360732	0.00763349	0.00819111		0.0014606	0.00100853	0.000459706	0.000289412			0.000696632	0.000696632	0.0002093	0.0002093
C19H19O2+	279.138	2	0.0012494	0.000536111	0.00165113	0.000381664		0.00091763	0.000181067	0.000863941	0.000104051		0.00020782	0.000142866	0.000336248	8.21441e-05		0.0021304	0.00213045	0.00446882	0.00460382		0.00153116	0.00126259	0.000545048	0.000522836			0.000384694	0.000384694	0.000117061	0.000117061
C16H23O4+	279.159	2	1.19875e-05	2.3975e-05	1.07926e-05	2.15853e-05		0.00013793	1.54758e-05	0.000136409	5.95182e-06		2.32762e-05	1.47158e-05	4.3761e-05	2.65079e-05		0.000188997	0.000205326	0.000418268	0.00049755		0.000151467	7.61875e-05	5.16408e-05	2.98359e-05			9.25059e-05	9.25059e-05	2.87497e-05	2.87497e-05
C20H23O+	279.174	2	0.000100919	0.000136634	9.29291e-05	0.000123591		0.000349983	5.46288e-05	0.000333277	2.60816e-05		4.94278e-05	3.04147e-05	8.20444e-05	1.39578e-05		0.000601124	0.000602631	0.00127361	0.00133817		0.000401023	0.000295673	0.000139406	0.000117462			0.000147506	0.000147506	4.42047e-05	4.42047e-05
C17H27O3+	279.195	2	3.16977e-05	6.33954e-05	2.85419e-05	5.70839e-05		0.000215693	3.41832e-05	0.000208491	1.6909e-05		4.83654e-05	2.53366e-05	8.94839e-05	3.508e-05		0.000227807	0.000236455	0.000495312	0.000557001		0.000284576	0.000203082	9.49823e-05	6.4215e-05			0.000103822	0.000103822	3.21366e-05	3.21366e-05
C21H27+	279.211	2	0.000145226	0.000210349	0.000132907	0.000189874		0.000594667	0.000113652	0.000574661	6.57586e-05		0.000130487	4.64244e-05	0.000250485	8.91279e-05		0.000493762	0.000504896	0.00106511	0.00117046		0.000432485	0.000222692	0.000137834	6.39218e-05			0.000247857	0.000247857	7.57347e-05	7.57347e-05
C18H31O2+	279.232	2	0.000417519	0.000719382	0.000378804	0.000647193		0.0025543	0.000653906	0.00239162	0.000426211		0.000486738	0.000281893	0.000814195	0.000167991		0.00546419	0.00549502	0.0116314	0.0123465		0.00191848	0.00151988	0.000669	0.000590355			0.000635856	0.000635856	0.00019727	0.00019727
C19H35O+	279.268	2	9.64775e-05	0.000192955	8.68951e-05	0.00017379		0.00112113	0.000295505	0.00107308	0.000197419		0.000191462	7.90739e-05	0.000348212	8.79045e-05		0.00183616	0.00184811	0.00391292	0.0041633		0.00133686	0.000503849	0.000451693	0.000177657			0.000656876	0.000656876	0.000206032	0.000206032
C20H39+	279.305	2	0	0	0	0		0.00121841	0.000283896	0.0011893	0.000187035		8.33607e-05	2.57173e-05	0.00016374	5.64265e-05		0.000887786	0.000893529	0.00189207	0.00201295		0.00105981	0.000413725	0.00034805	0.000104184			0.0011524	0.0011524	0.000366216	0.000366216
[truncated: 154 more rows]

## Sheet: functional group
	Group	Ion formula	Protonated mass (m/z)	Most probable compounds/Unidentified peak
	carbonyl
[truncated: 1,533 more rows]

## Sheet: potential markers
Burning types	Vocus	Formula	p_max	log2FC_mean	log2FC_std
[truncated: 667 more rows]
