# Supplementary material for: Chemical characterization of organic vapors from wood, straw, cow dung, and coal burning
Source: Copernicus journal article supplement (doi:10.5194/acp-25-2707-2025), 2025-03-03
Supplement: Supplementary file 2 [file acp-25-2707-2025-supplement.zip]

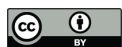

*Supplement of*

## **Chemical characterization of organic vapors from wood, straw, cow dung, and coal burning**

**Tiantian Wang et al.**

*Correspondence to:* Andre S. H. Prevot ([andre.prevot@psi.ch](mailto:andre.prevot@psi.ch)) and David M. Bell ([david.bell@psi.ch](mailto:david.bell@psi.ch))

- [acp-25-2707-2025-supplement-title-page.pdf](#)
- [Supplement.pdf](#)
- [Table S3.xlsx](#)

The copyright of individual parts of the supplement might differ from the article licence.
